# Supplementary material
Source: PubMed Central journal article supplement (PMC7756242)
Supplement: jama-e2023130-s001.pdf [file jama-e2023130-s001.pdf]

## Supplemental Online Content

Sung H, Hyun N, Leach CR, Yabroff KR, Jemal A. Association of first primary cancer with risk of subsequent primary cancer among survivors of adult-onset cancers in the United States. *JAMA*. doi:10.1001/jama.2020.23130

**eFigure 1A.** Excess Absolute Risk of Developing Subsequent Primary Cancers Among 5-Year Cancer Survivors by Sex

**eFigure 1B.** Excess Absolute Risk of Dying From Subsequent Primary Cancers Among 5-Year Cancer Survivors by Sex

**eFigure 2.** Standardized Incidence Ratios for the Risk of Subsequent Primary Cancer (A, B) and Standardized Mortality Ratios for the Risk of Dying From a Subsequent Primary Cancer (C, D) With Statistically Significant Lower-Than-Expected Values by Sex

**eFigure 3.** Risk of Developing Any Alcohol- or Infection-Related Subsequent Primary Cancers Among Survivors of Prior Alcohol- or Infection-Related Cancers

**eFigure 4.** Ratios of Standardized Incidence Ratios for Select Subsequent Primary Cancer Types Among 5-Year Cancer Survivors by First Primary Cancer Diagnosis Year (1975-1989, 1990-1999, 2000-2011) in 9 SEER Registries

**eTable 1.** Characteristics Of The Survivors Who Were Diagnosed With An Invasive First Primary Cancer From 1975-2011 At Ages 20-84 And Who Survived For 5 Years Or Longer in 9 SEER registries

**eTable 2.** Classification Of Cancer Types Based on ICD-O-3 Site and Type Code and Definitions of The Same-Type Cancers

**eTable 3.** Definitions and Classification of Smoking-, Obesity-, Alcohol-, and Infection-Related Cancers

**eTable 4.** Number of Survivors and Person-Years of Follow-Up Included in the Mortality Analysis by First Primary Cancer Sites and Sex

**eTable 5.** Risks of Developing or Dying from Subsequent Primary Cancers Among 5-Year Survivors of Other and Unspecified Primary Cancer Sites by Sex

**eTable 6.** Risks of Developing Specific Type of Subsequent Primary Cancer Among 5-Year Cancer Survivors in 12 SEER Registries: Incidence, Percent Contribution to the Total Incidence, Standardized Incidence Ratio by First Primary Cancer Types and Sex

**eTable 7.** Risks of Dying from a Specific Type of Subsequent Primary Cancer Among 5-Year Cancer Survivors in 12 SEER Registries: Mortality, Percent Contribution to the Total Mortality, Standardized Mortality Ratio by First Primary Cancer Types and Sex

**eTable 8.** Percentage Contribution of Each Subsequent Primary Cancer Types to the Total Incidence of Subsequent Primary Cancer and to the Total Subsequent Primary Cancer Mortality Among All 5-Year Cancer Survivors by Sex in 12 SEER Registries

**eTable 9.** Risk of Developing Any Smoking- or Any Obesity-Related Subsequent Primary Cancers Among Smoking or Obesity-Related Cancer Survivors

**eTable 10.** Standardized Incidence Ratios and Ratios of Standardized Ratios by Diagnosis Year (1975-1989, 1990-1999, 2000-2011) for the Risk of Select 6 Subsequent Primary Cancers Among 5-Year Survivors of 16 First Primary Cancer Types in 9 SEER Registries

**eTable 11.** Results Based on a Single Outcome Analysis for the Risk of Developing Subsequent Primary Cancer Overall Among 5-Year Cancer Survivors in 12 SEER Program Registries

**eTable 12.** Results Based on the Earlier Start of Follow-Up (Since 1 Year From First Primary Cancer Diagnosis) for the Risk of Developing Subsequent Primary Cancer Overall Among 1-Year Cancer Survivors in the 12 SEER Registries

#### **eReferences.**

This supplemental material has been provided by the authors to give readers additional information about their work.

## **eMethods**

### **The National Cancer Institute's Surveillance, Epidemiology, and End Results (SEER) Program<sup>1</sup>**

Data for cancer incidence and mortality were obtained from the National Cancer Institute's Surveillance, Epidemiology, and End Results (SEER) Program, which includes population-based cancer registries that capture information by law on all cancer diagnoses occurring among residents within a geographically defined area. The SEER Program registries routinely collect data on patient demographics, primary tumor site, tumor morphology and stage at diagnosis, first course of treatment, and follow-up for vital status. The mortality data reported by SEER are provided by the National Center for Health Statistics. The population data used in calculating cancer rates is obtained periodically from the Census Bureau.

### **Race determination in the SEER Program**

Race determination in the SEER Program is based on all resources in the facility, including the medical record, face sheet, physician and nursing notes, photographs, electronic data, and any other sources. When race is not stated but other information is provided in the medical record, Race Coding is based on Appendix D, Race And Nationality Descriptions From the 2000 U.S. Census Bureau and National Center for Health Statistics.<sup>2</sup> SEER race fields makes it possible to code multiple races for one person, consistent with the 2000 Census.<sup>3</sup> In this study, race was classified as 5 groups: White, Black, American Indian/Alaska Native (AI/AN), Asian/Pacific Islander (API), and unknown. For incidence analysis, persons with AI/AN and API were combined as a group, and persons with unknown race were combined with White so this group can be matched with racial groups in the incidence reference file. For mortality analysis, AI/AN and API were combined as a group, and persons with unknown race (n=14,947; 1%) were excluded from the analysis for the compatibility in the race matching with the reference mortality file.

### **Study population**

To examine the recent pattern of the risk for developing and dying from new malignancies among cancer survivors, we identified survivors who were diagnosed with an invasive first primary cancer at ages 20-84, excluding non-melanoma skin cancer, during 1992-2011 and who survived 5 years or more, from the 12 SEER registries (Atlanta (Metropolitan), Connecticut, Detroit (Metropolitan), Hawaii, Iowa, Los Angeles, New Mexico, Rural Georgia, San Francisco-Oakland SMSA, San Jose-Monterey, Seattle (Puget Sound), Utah, covering approximately 13%

of the US population.<sup>4,5</sup> Alaska registry, in the SEER 13 Program, was excluded because of incompatibility of the reference file in the race matching. We excluded survivors with cancer diagnosis based only on autopsy reports or death certificates. Cancers were classified according to the tenth *International Classification of Diseases for Oncology 3<sup>rd</sup> edition* (ICD-O-3) (30 types in men and 31 types in women; **eTable 2**) and categorized according to SEER site groups.<sup>6</sup> Chronic lymphocytic leukemia was classified into a subtype of non-Hodgkin lymphoma according to the 2001 WHO classification of lymphoid neoplasms.<sup>7</sup>

To examine long-term temporal trend in the risk of developing new malignancies, we identified 5-year survivors whose first primary cancers were diagnosed during 1975-2011 from the 9 SEER registries (Atlanta (Metropolitan), Connecticut, Detroit (Metropolitan), Hawaii, Iowa, New Mexico, San Francisco-Oakland SMSA, Seattle (Puget Sound), Utah), using the aforementioned method.<sup>8</sup>

### **Primary outcomes**

The primary outcomes were incidence (per 10,000 person-years) and relative risk of developing SPCs among 5-year survivors of FPCs (standardized incidence ratio [SIR]). The secondary outcomes were mortality and relative risk of dying from a SPC (death from non-index cancer) among survivors (standardized mortality ratios [SMR]).

### **Follow-up and ascertainment of subsequent primary cancers**

Survivors were followed from 5 years since FPC diagnosis until death, loss to follow-up (n=61,153, 4.0% in the 12 SEER registries; 22,472, 3.0% in the 9 SEER registries), attaining age at 89 (due to concerns regarding under-ascertainment in elderly population)<sup>9</sup>, or December 31, 2017, whichever came first. SPCs were ascertained following the SEER rules for Determining Multiple Primaries, considering the type of organ, date of diagnosis, histology, tumor behavior, and laterality of paired organ.<sup>10</sup> “Overall SPCs” included all new primary cancers except same-type cancer (to minimize bias due to misclassification of recurrence) and non-melanoma skin cancer (definitions of same-type cancer in **eTable 2**). Further, for some organs, we extended definitions of same-type cancers to the anatomical types close to FPCs to reduce bias due to heightened medical surveillance of adjacent regions as well as artifactually decreased risks when surgery for the initial tumor often removes one or more closely located organs from risk. To take into account SPCs that take years of latency (e.g., radiotherapy-induced cancer)<sup>11</sup> and/or occur relatively in older ages, multiple events in a survivor were

allowed; therefore, survivors remained in the study after experiencing prior SPCs before censoring.

Cause of death was based on death certificate information reported to state vital statistics offices and compiled into a national file through CDC's National Center for Health Statistics' National Vital Statistics System.<sup>12</sup> The underlying causes of death were selected according to ICD-10 and then categorized according to SEER site groups.

### **Statistical analysis**

We quantified the risk of developing SPCs among cancer survivors using incidence per 10,000 person-years and SIRs for overall and type-specific (organ-specific) SPCs in each of survivor groups of FPC and all survivors combined. For type-specific risks, analyses were limited to SPCs with 5 or more observed number of cases. The risk of dying from any type of SPCs (non-index cancers) among cancer survivors were measured using mortality per 10,000 person-years and standardized mortality ratios (SMR) in each of survivor groups of FPCs, using the same approach for incidence delineated below.

We define the following notation:

- (1)  $PY_i$  denotes the person-years at risk since the development of FPC  $i$ .
- (2)  $O_{ij}$  denotes the observed number of cases for SPC  $j$  during  $PY_i$ .
- (3)  $E_{ij}$  denotes the expected number of SPC  $j$  among survivors of FPC  $i$  and is calculated by  $\sum_{s \in S} PY_{is} \times \lambda_{js}$ , where  $S$  is the list of strata determined by race (white/unknown, Black, AI/AN/API), sex, age (5-year) and calendar year (1992-1994, 1995-1999, 2000-2004, 2005-2009, 2010-2014, 2015-2017) and  $\lambda_{js}$  is the incidence rate for cancer  $j$  in the general population within stratum  $s$ .

### ***Incidence per 10,000 person-years and percentage contribution to the total incidence***

Incidence of SPCs per 10,000 person-years among each survivor group of FPCs and all survivors combined were obtained by  $O_{ij} \times 10,000/PY_i$  and  $\sum_i O_{ij} \times 10,000/PY$ , respectively. Note that  $PY = \sum_i PY_i$ . The confidence intervals were calculated under the assumption that the occurrence of subsequent cancers follows a Poisson distribution with the calculated incidence as a mean. The percentage contribution of each FPC-SPC combination to the overall absolute

risk of all SPCs among all survivors was calculated by  $(O_{ij}/PY)/(\sum_{ij} O_{ij}/PY)$ , that is  $O_{ij}/\sum_{ij} O_{ij}$ .

### **Standardized incidence ratio (SIR) and excess absolute incidence per 10,000 person-years**

The SIR was calculated as the ratio of the observed-to-expected number of SPCs, that is,  $O_{ij}/E_{ij}$  and  $\sum_j O_{ij}/\sum_j E_{ij}$  for type-specific SIR and SIR for all types of SPCs by FPCs, respectively.<sup>9</sup> The corresponding excess absolute incidence per 10,000 person-years for type-specific SIR was obtained by  $(O_{ij} - E_{ij}) \times 10,000/PY_i$ .

### **Risk of developing any type of smoking-, obesity-, alcohol-, or infection-related cancer among survivors of first primary cancers associated with each of risk factors**

Among each of survivor groups of 12 smoking-related cancers<sup>13</sup>, incidence per 10,000 person-years and SIRs (95% CIs) were estimated to quantify the risk of developing any types of smoking-related SPCs except for SPCs that occurred at the same site as the FPC. The same approach was used to quantify the risk of developing any types of obesity-<sup>14</sup>, alcohol-<sup>15</sup>, and infection-related<sup>16</sup> cancers. The definitions of cancer groups according to risk factors were presented in **eTable3**.

### **Temporal trend analysis**

For the select 6 SPCs for EAR, SIRs were calculated for each of the 16 top FPC survivors in men and women combined by diagnosis years (1975-1989, 1990-1999, 2000-2011) based on data from the 9 SEER registries. We used a multi-covariate Poisson regression model to test the trend in SIRs (ratio of SIR, RR) over diagnosis years. The model included the observed number of cases as the outcome, the log of expected number of cases as an offset to indirectly adjust for attained age and attained year of SPCs, and age at first cancer diagnosis (20-39, 40-64, 65-84 years), sex, and time since first cancer diagnosis (60-119, 120-179, 180+ months) as covariables.<sup>17,18</sup>

We tested the linear term for the three periods in the regression model by using likelihood ratio test. It was assessed the goodness-of-fit of the model by using Chi-square test based on deviance. The model reasonably explained most the select FPC-SPC combinations (lack-of-fit results in 10 p-values<0.05 in total and 4 p-values<0.05 in men/women). The goodness-of-fit

test is sensitive to observed number of cases. Thus, we reported p-values as those were unless point estimates for the regression coefficients and standard errors seem reliable according to the empirical distributions for point estimates and standard errors. To quantify change rates in SIRs, we calculated the ratio of SIRs by using the fitted model and letting 1975-1989 SIR be the reference.

### ***Sensitivity analyses***

Sensitivity analyses were performed to determine whether the overall risks of developing SPCs are affected by restricting the risk of SPCs to only the first SPC (disallowing multiple events in an individual) or by starting follow-up for occurrence of SPCs 1 year since FPC diagnosis (without change in allowing multiple events in an individual). In the analysis restricted to the first SPC, survivors were censored at diagnosis of the first SPC, death, loss to follow-up, attaining age at 89, or December 31, 2017, whichever came first.

All analyses were stratified by sex except the trend analysis. Statistical significances were two-sided, p-values less than  $<0.05$ . The tests, however, did not consider multiple comparison correction as this analysis was exploratory. All analyses were performed using the “MP-SIR” session of SEER\*Stat 8.3.6,<sup>19</sup> SAS 9.4, and Microsoft Excel Office 365 ProPlus.

**eFigure 1A.** Excess absolute incidence per 10,000 person-years for subsequent primary cancers (A, C) and corresponding percentage contributions of any given first primary cancer-subsequent primary cancer combination to the total excess absolute incidence (B, D) by sex among 5-year cancer survivors

(A) Men, Excess Absolute Incidence per 10,000 Person-years

(B) Men, Percentage Contribution to the Total Excess Absolute Incidence

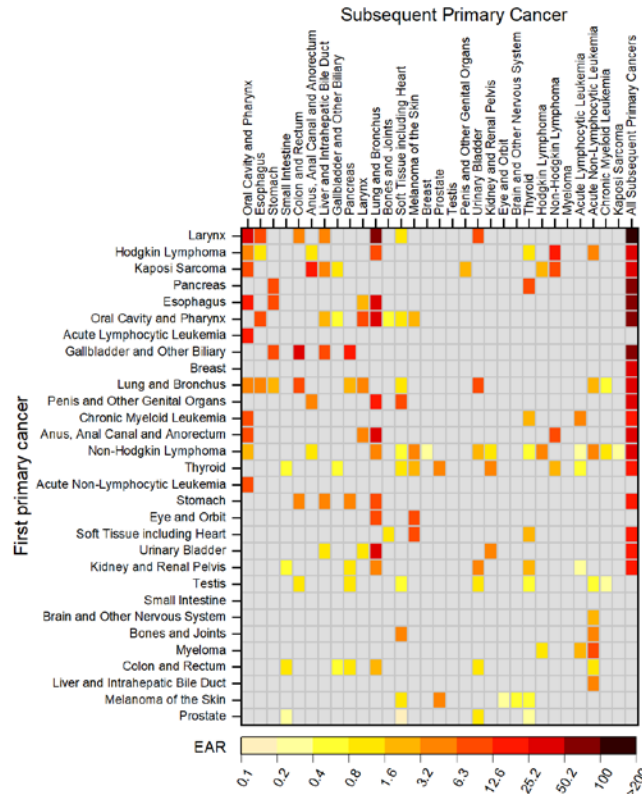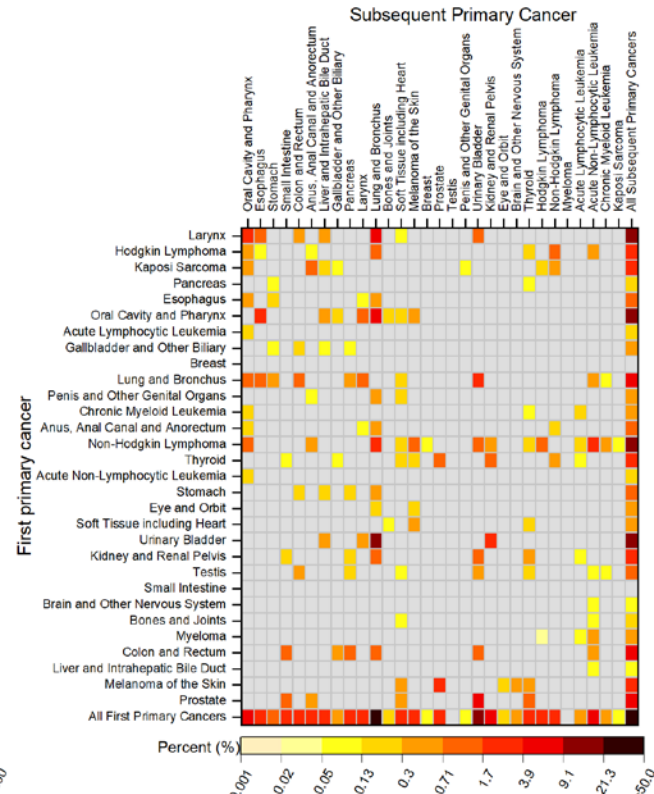

(C) Women, Excess Absolute Incidence per 10,000 Person-years

(D) Women, Percentage Contribution to the Total Excess Absolute Incidence

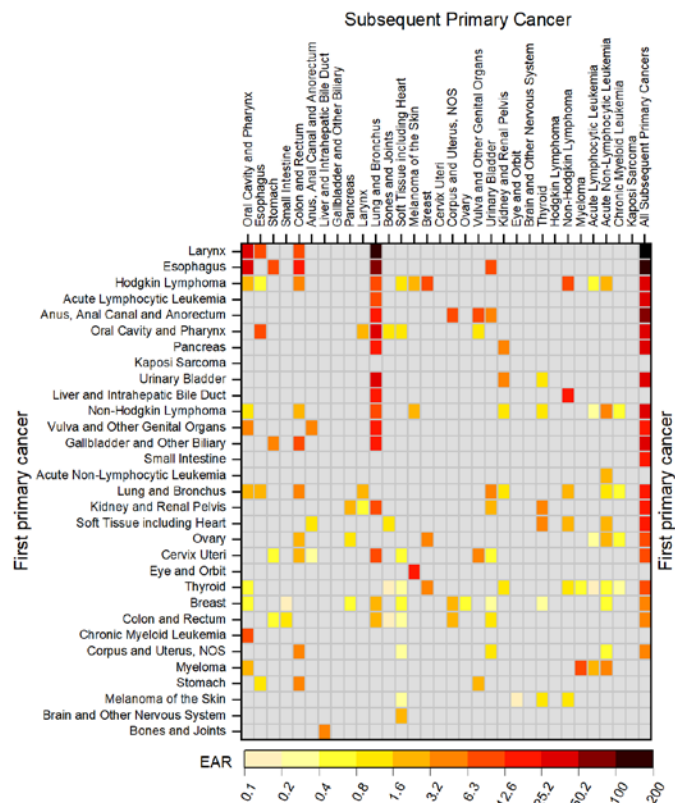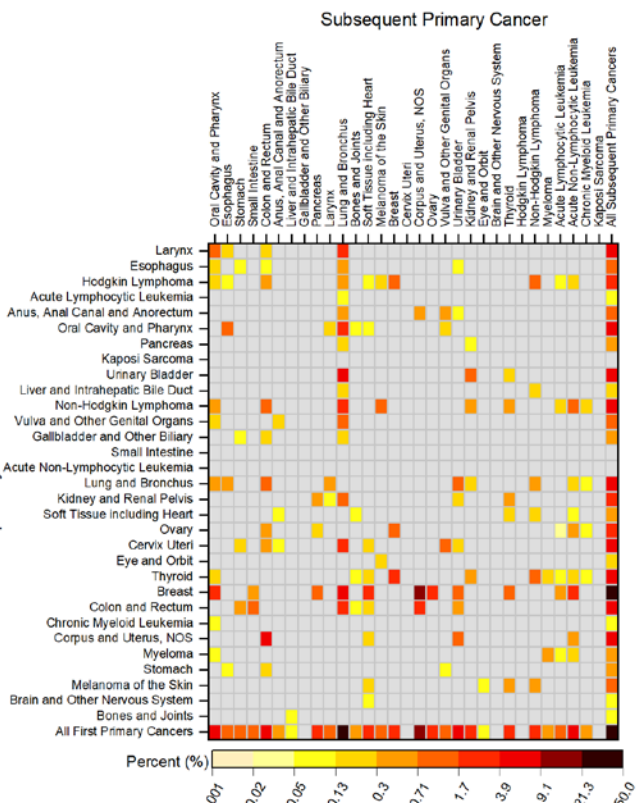



**eFigure 1B.** Excess absolute mortality per 10,000 person-years for subsequent primary cancers (A, C) and corresponding percentage contributions of any given first primary cancer-subsequent primary cancer combination to the total excess absolute mortality (B, D) by sex among 5-year cancer survivors

(A) Men, Excess Absolute Mortality per 10,000 Person-years

(B) Men, Percentage Contribution to the Total Excess Absolute Mortality

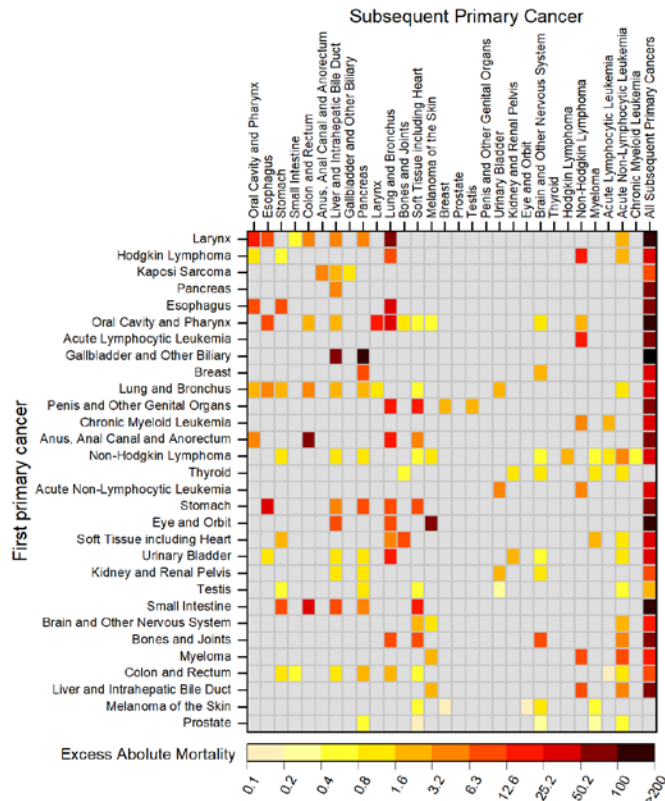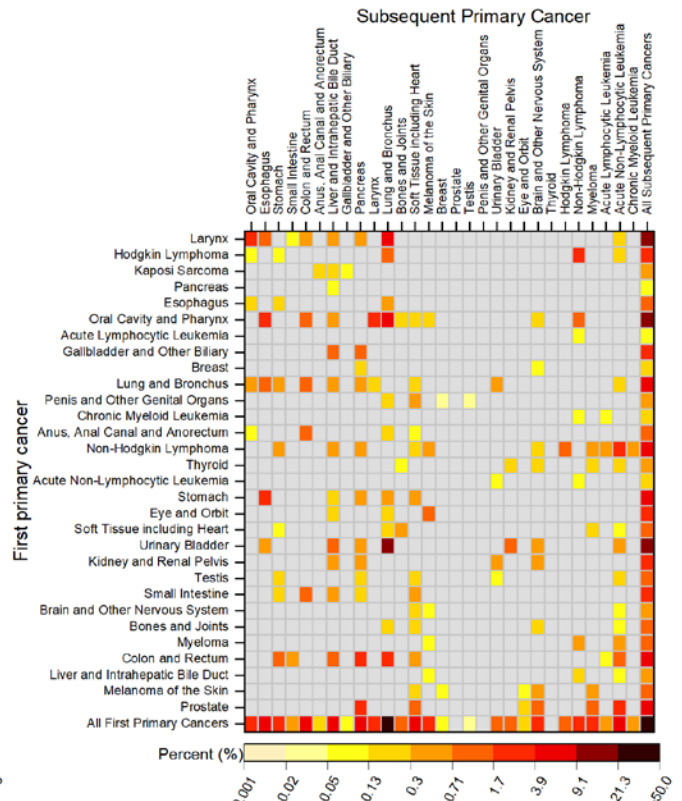

(C) Women, Excess Absolute Mortality per 10,000 Person-years

(D) Women, Percentage Contribution to the Total Excess Absolute Mortality

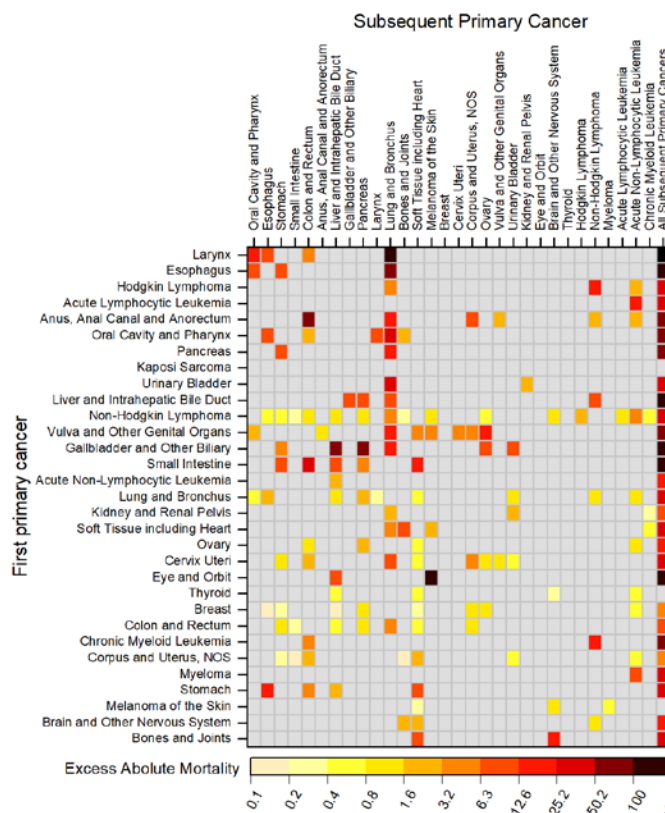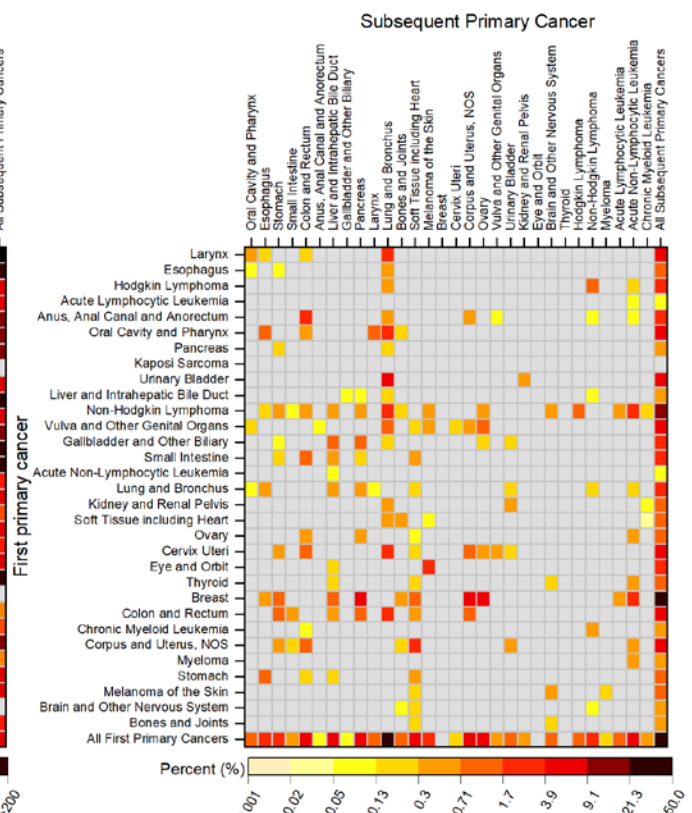

**eFigure 2.** Standardized incidence ratios for the risk of subsequent primary cancer (A, B) and standardized mortality ratios for the risk of dying from a subsequent primary cancer (C, D) with statistically significant lower-than-expected values by sex

(A) Men, Standardized Incidence Ratio

(B) Women, Standardized Incidence Ratio

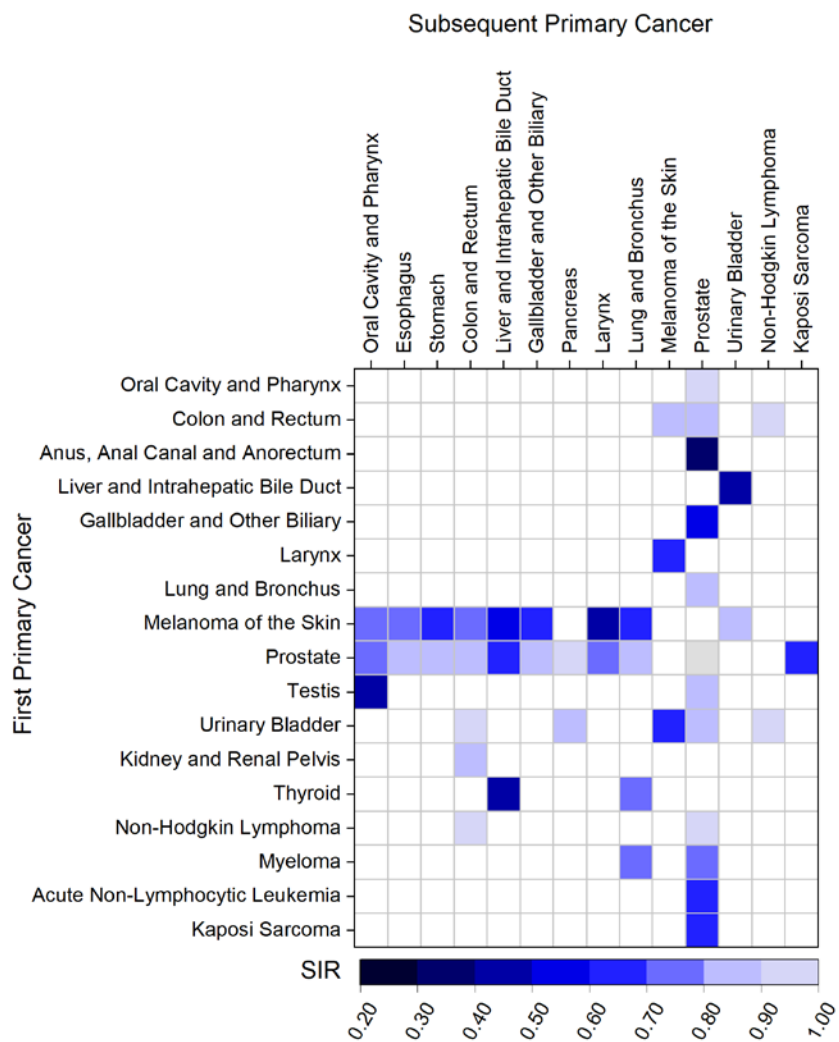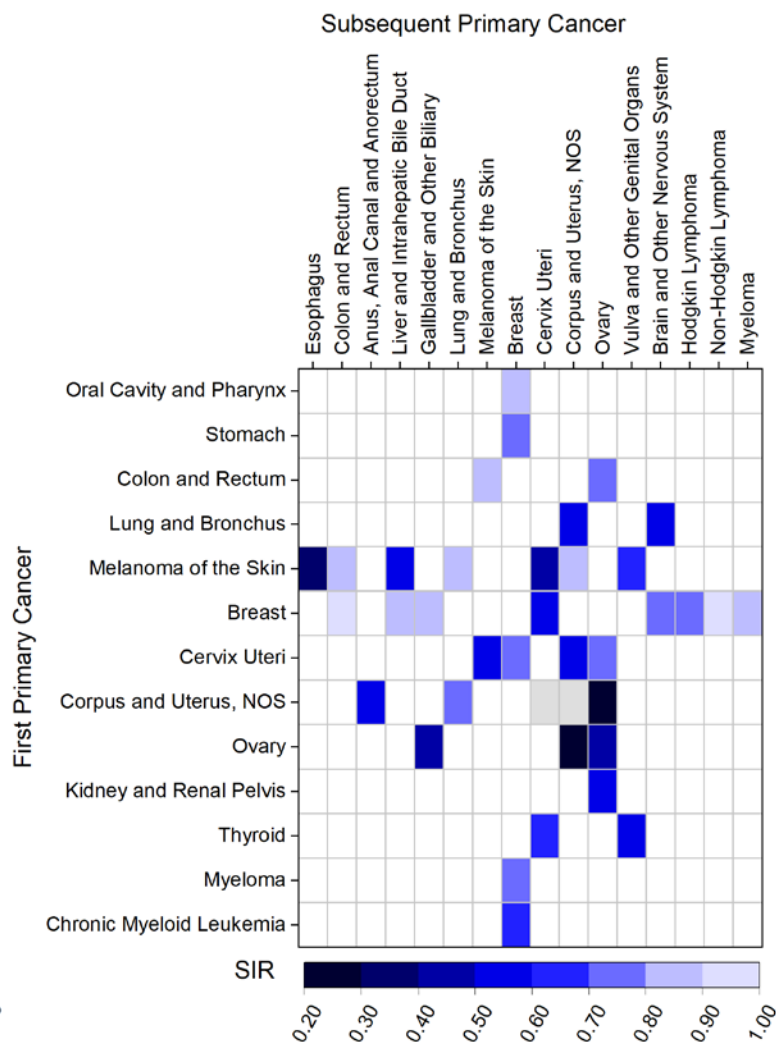

(C) Men, Standardized Mortality Ratio

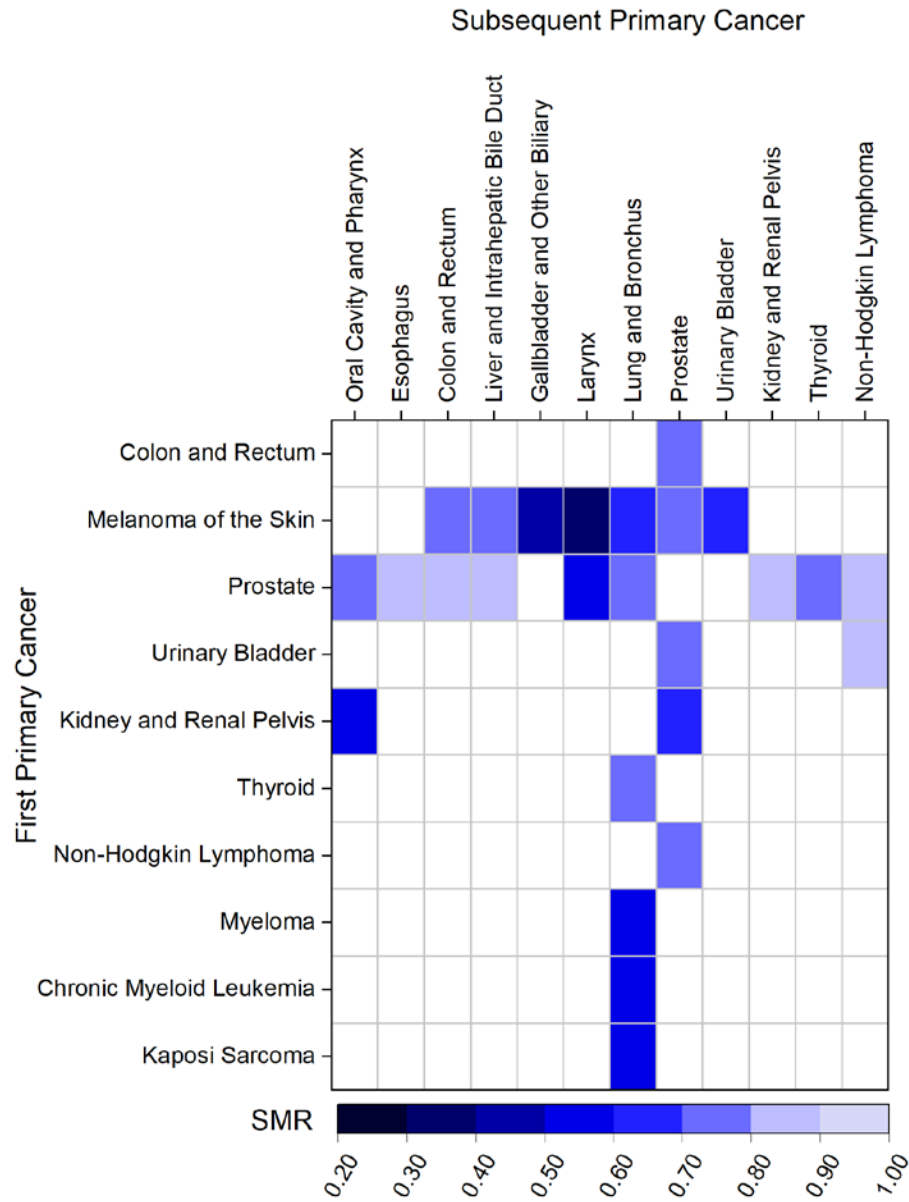

(D) Women, Standardized Mortality Ratio

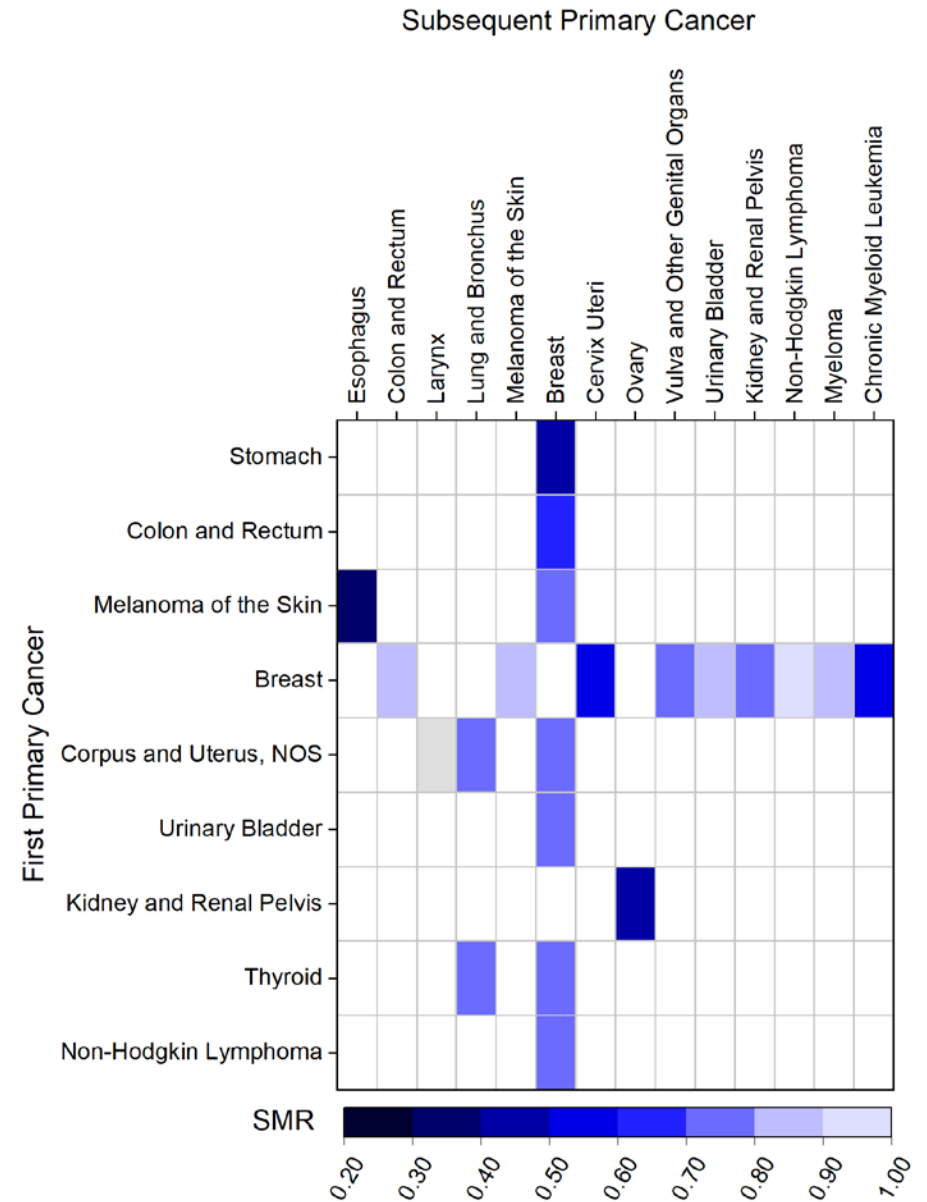

**eFigure 3.** Risk of developing any alcohol- or infection-related subsequent primary cancers among survivors of prior alcohol- or infection-related cancers

(A) The risk of developing any subsequent alcohol-related cancers among survivors of alcohol-related first primary cancers

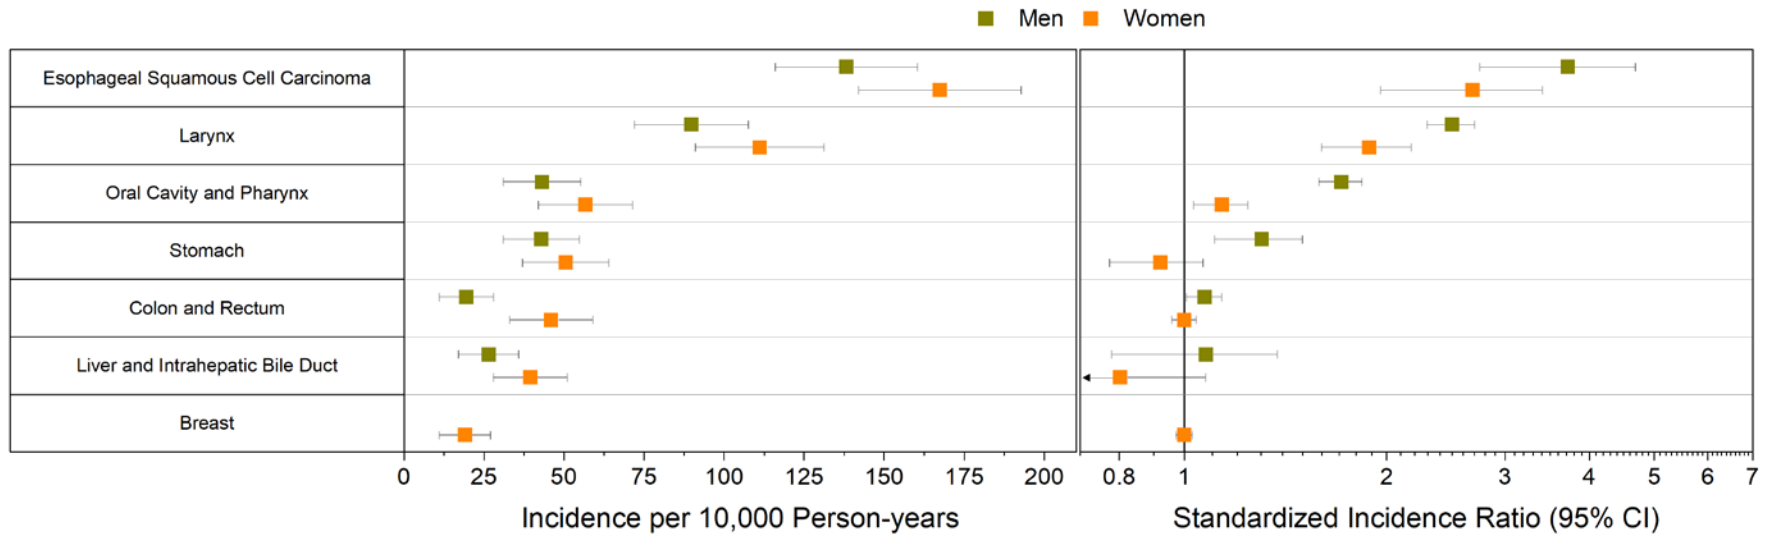

(B) The risk of developing any subsequent infection-related cancers among survivors of infection-related first primary cancers

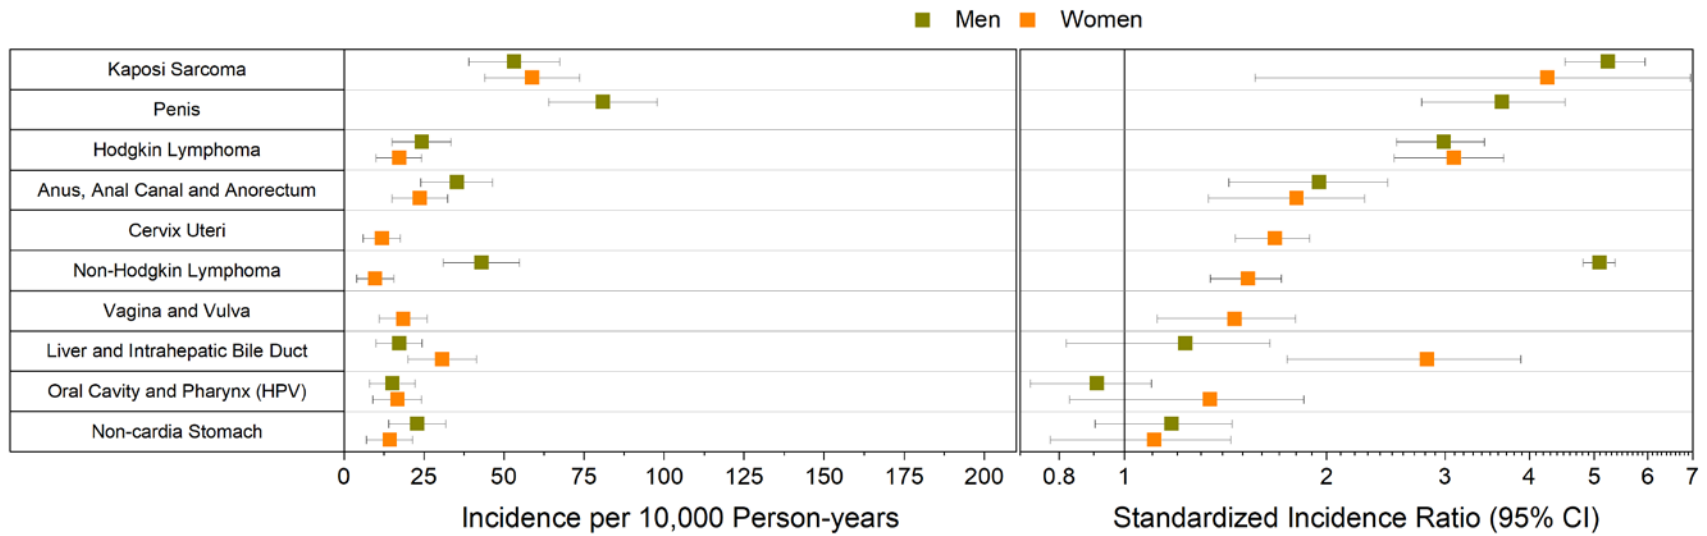

NOTE: Among each group of survivors of 7 alcohol-related cancers<sup>15</sup>, incidence per 10,000 person-years and SIRs were estimated to quantify the risk of developing any alcohol-related SPCs (except for SPCs that occurred at the same site as the FPC). Similarly, among each group of survivors of 10 infection-related cancers<sup>16</sup>, incidence per 10,000 person-years and SIRs were estimated for the risk of developing any infection-related SPCs. The risk of developing subsequent alcohol- or infection-related cancer after each of FPCs cannot be entirely attributable to alcohol or infection because of other risk factors. Refer to **eTable3** for definitions and classifications of alcohol- and infection-related cancers.

**eFigure 4.** Ratios of standardized incidence ratios for select subsequent primary cancer types among 5-year cancer survivors by first primary cancer diagnosis year (1975-1989, 1990-1999, 2000-2011) in 9 SEER registries

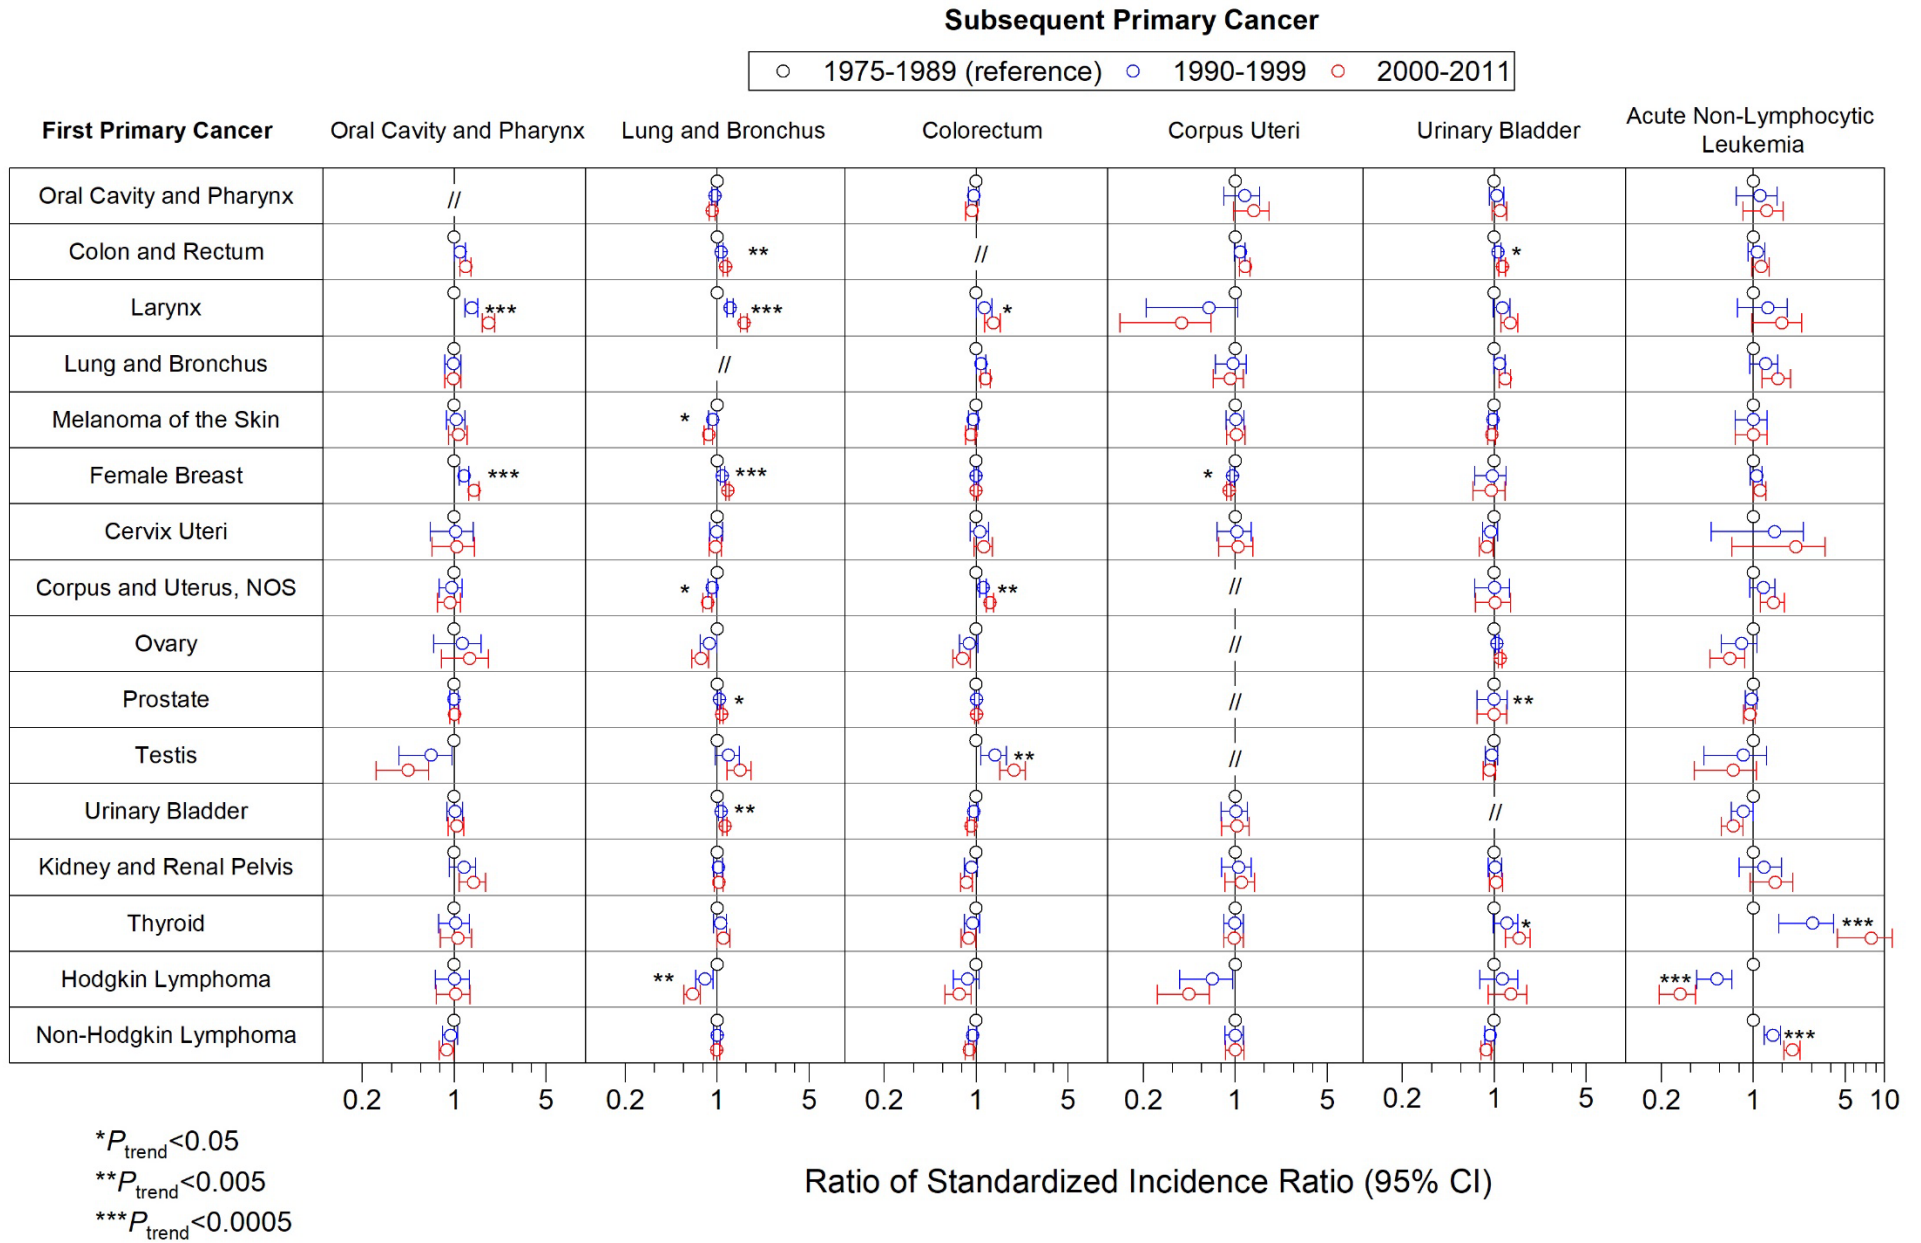

Abbreviations: CI, confidence interval; NOS, not otherwise specified; SEER, Surveillance, Epidemiology and End Results

Note:  $P_{\text{trend}}$  in the SIRs were tested using the likelihood ratio test for the linear diagnosis year term in a multi-covariate Poisson regression model. The model included the observed number of cases as an outcome, calendar year of (1975-1989 [reference], 1990-1999, 2000-2011), age at (20-39, 40-64, 66-84 years), and time since first cancer diagnosis (60-119, 120-179, 180+ months) and sex as covariables, and the log of the expected number of cases as an offset to indirectly adjust for attained age and attained year of SPCs. The linear trend for same-site subsequent primary cancer among survivors were not tested. All point estimates (95% CI) can be found in **eTable10**.

**eTable 1.** Characteristics of the survivors who were diagnosed with an invasive first primary cancer from 1975-2011 at ages 20-84 and who survived for 5 years or longer in 9 SEER registries

|                                                 | Survivors |       | Person-years of follow-up since 5 years from first primary cancer |      |
|-------------------------------------------------|-----------|-------|-------------------------------------------------------------------|------|
|                                                 | N         | %     | Total                                                             | Mean |
| Total                                           | 1669351   | 100   | 15030109                                                          | 9.0  |
| Sex                                             |           |       |                                                                   |      |
| Male                                            | 819,290   | 49.1  | 6612348                                                           | 8.1  |
| Female                                          | 850,061   | 50.9  | 8417762                                                           | 9.9  |
| Age at first primary cancer diagnosis           |           |       |                                                                   |      |
| 20-39 years                                     | 152,374   | 9.1   | 2232405                                                           | 14.7 |
| 40-64 years                                     | 820,822   | 49.2  | 8558360                                                           | 10.4 |
| 65-84 years                                     | 696,155   | 41.7  | 4239344                                                           | 6.1  |
| Calendar year of first primary cancer diagnosis |           |       |                                                                   |      |
| 1975-1989                                       | 448,868   | 26.9  | 5776238                                                           | 12.9 |
| 1990-1999                                       | 483,349   | 29.0  | 5186392                                                           | 10.7 |
| 2000-2011                                       | 737,134   | 44.2  | 4067479                                                           | 5.5  |
| Survivors entering follow-up interval           |           |       |                                                                   |      |
| 60-119 months                                   | 1,669,351 | 100.0 | 6776988                                                           | 4.1  |
| 120-179 months                                  | 1,045,405 | 62.6  | 4019931                                                           | 3.8  |
| 180+ months                                     | 599,016   | 35.9  | 4233190                                                           | 7.1  |
| Race                                            |           |       |                                                                   |      |
| White                                           | 1,418,216 | 85.0  | 12950609                                                          | 9.1  |
| Black                                           | 134,445   | 8.1   | 1070739                                                           | 8.0  |
| Asian or Pacific Islander                       | 98,589    | 5.9   | 855902                                                            | 8.7  |
| Unknown                                         | 10,250    | 0.6   | 86490                                                             | 8.4  |
| American Indian/Alaska Native                   | 7,851     | 0.5   | 66368                                                             | 8.5  |
| SEER registry recoded for first primary cancer  |           |       |                                                                   |      |
| Detroit (Metropolitan)                          | 277,604   | 16.6  | 2484292                                                           | 8.9  |
| Seattle (Puget Sound)                           | 262,233   | 15.7  | 2348222                                                           | 9.0  |
| San Francisco-Oakland SMSA                      | 259,800   | 15.6  | 2403567                                                           | 9.3  |
| Connecticut                                     | 255,991   | 15.3  | 2316091                                                           | 9.0  |
| Iowa                                            | 207,143   | 12.4  | 1839226                                                           | 8.9  |
| Atlanta (Metropolitan)                          | 139,871   | 8.4   | 1268111                                                           | 9.1  |
| Utah                                            | 101,270   | 6.1   | 898511                                                            | 8.9  |
| New Mexico                                      | 93,741    | 5.6   | 812214                                                            | 8.7  |
| Hawaii                                          | 71,698    | 4.3   | 659877                                                            | 9.2  |
| SEER Historic Stage                             |           |       |                                                                   |      |
| Localized                                       | 761,926   | 45.6  | 7738233                                                           | 10.2 |
| Localized/regional (Prostate cases)             | 241,012   | 14.4  | 1602269                                                           | 6.6  |
| Regional                                        | 296,621   | 17.8  | 2634122                                                           | 8.9  |
| Distant                                         | 88,703    | 5.3   | 592378                                                            | 6.7  |
| Unstaged                                        | 143,041   | 8.6   | 1316253                                                           | 9.2  |
| Blank(s)                                        | 138,048   | 8.3   | 1146854                                                           | 8.3  |
| Reasons for exit of the current study           |           |       |                                                                   |      |
| End of Study                                    | 538,898   | 73.1  | -                                                                 | -    |
| Death                                           | 175,764   | 23.8  | -                                                                 | -    |
| Lost to Follow-up                               | 22,472    | 3.0   | -                                                                 | -    |



**eTable 2.** Classification of cancer types based on ICD-O-3 Site and Type code and definitions of the same-type cancers

| Cancer Types                                                                                                          | ICD-O-3 Site                                                                                                                                                         | ICD-O-3 Histology                                    | Definitions of same-site subsequent cancer <sup>a</sup>                          |
|-----------------------------------------------------------------------------------------------------------------------|----------------------------------------------------------------------------------------------------------------------------------------------------------------------|------------------------------------------------------|----------------------------------------------------------------------------------|
| Oral Cavity and Pharynx                                                                                               | C000-C009, C019-C029, C079-C089, C040-C049, C030-C039, C050-C059, C060-C069, C110-C119, C090-C099, C100-C109, C129, C130-C139, C140, C142, C148                      | Any histologies excluding 9050-9055, 9140, 9590-9992 | -                                                                                |
| Esophagus                                                                                                             | C150-C159                                                                                                                                                            |                                                      | -                                                                                |
| Stomach                                                                                                               | C160-C169                                                                                                                                                            |                                                      | -                                                                                |
| Small Intestine                                                                                                       | C170-C179                                                                                                                                                            |                                                      | -                                                                                |
| Colon and Rectum                                                                                                      | C180, C181, C182, C183, C184, C185, C186, C187, C188-C189, C260, C199, C209                                                                                          |                                                      | Colon and Rectum, Anus, Anal Canal and Anorectum                                 |
| Anus (and Anal Canal and Anorectum)                                                                                   | C210-C212, C218                                                                                                                                                      |                                                      | -                                                                                |
| Liver (and Intrahepatic Bile Duct)                                                                                    | C220, C221, C239                                                                                                                                                     |                                                      | -                                                                                |
| Gallbladder (and Other Biliary)                                                                                       | C239, C240-C249                                                                                                                                                      |                                                      | -                                                                                |
| Pancreas                                                                                                              | C250-C259                                                                                                                                                            |                                                      | -                                                                                |
| Other Digestive Organs (including Retroperitoneum, Peritoneum, Omentum and Mesentery) <sup>b</sup>                    | C480, C481-C482, C268-C269, C488                                                                                                                                     |                                                      | -                                                                                |
| Larynx                                                                                                                | C320-C329                                                                                                                                                            |                                                      | -                                                                                |
| Lung (and Bronchus)                                                                                                   | C340-C349                                                                                                                                                            |                                                      | -                                                                                |
| Other Respiratory Organs (including Nose, Nasal Cavity and Middle Ear, Pleura, Trachea, and Mediastinum) <sup>b</sup> | C300-C301, C310-C319 (Nose, Nasal Cavity and Middle Ear), C384 (Pleura), C339, C381-C383, C388, C390, C398, C399 (Trachea, Mediastinum and Other Respiratory Organs) |                                                      | -                                                                                |
| Bones and Joints                                                                                                      | C400-C419                                                                                                                                                            |                                                      | -                                                                                |
| Soft Tissue including Heart                                                                                           | C380, C470-C479, C490-C499                                                                                                                                           |                                                      | -                                                                                |
| Melanoma of the Skin                                                                                                  | C440-C449                                                                                                                                                            | 8720-8790                                            | -                                                                                |
| Breast                                                                                                                | C500-C509                                                                                                                                                            | Any histologies excluding 9050-9055, 9140, 9590-9992 | -                                                                                |
| Cervix Uteri                                                                                                          | C530-C539                                                                                                                                                            |                                                      | -                                                                                |
| Corpus and Uterus, Not Otherwise Specified                                                                            | C540-C549, C559                                                                                                                                                      |                                                      | Corpus and Uterus, NOS, Cervix Uteri, Ovary, and all Other Female Genital Organs |
| Ovary                                                                                                                 | C569                                                                                                                                                                 |                                                      | Corpus and Uterus, NOS, Cervix Uteri, Ovary, and all Other Female Genital Organs |

| Cancer Types                                           | ICD-O-3 Site                                                                   | ICD-O-3 Histology                                                                                                                                                        | Definitions of same-site subsequent cancer <sup>a</sup> |
|--------------------------------------------------------|--------------------------------------------------------------------------------|--------------------------------------------------------------------------------------------------------------------------------------------------------------------------|---------------------------------------------------------|
| Vulva and Other Genital Organs                         | C529, C510-C519, C570-C579, C589                                               |                                                                                                                                                                          | -                                                       |
| Prostate                                               | C619                                                                           |                                                                                                                                                                          | -                                                       |
| Testis                                                 | C620-C629                                                                      |                                                                                                                                                                          | -                                                       |
| Penis and Other Genital Organs                         | C600-C609, C630-C639                                                           |                                                                                                                                                                          | -                                                       |
| Kidney and Renal Pelvis                                | C649, C659                                                                     |                                                                                                                                                                          | -                                                       |
| Urinary Bladder                                        | C670-C679                                                                      |                                                                                                                                                                          | Urinary Bladder, Ureter, and Other Urinary Organs       |
| Other Urinary Organs (including Ureter) <sup>b</sup>   | C669, C680-C689                                                                |                                                                                                                                                                          | Urinary Bladder, Ureter, and Other Urinary Organs       |
| Eye and Orbit                                          | C690-C699                                                                      |                                                                                                                                                                          | -                                                       |
| Brain and Other Nervous System                         | C710-C719, C700-C709, C720-C729                                                |                                                                                                                                                                          | -                                                       |
| Thyroid                                                | C739                                                                           |                                                                                                                                                                          | -                                                       |
| Other Endocrine Organs (including Thymus) <sup>b</sup> | C379, C740-C749, C750-C759                                                     |                                                                                                                                                                          | -                                                       |
| Hodgkin Lymphoma                                       |                                                                                |                                                                                                                                                                          | -                                                       |
| <i>Hodgkin – Nodal</i>                                 | C024, C098-C099, C111, C142, C379, C422, C770-C779                             | 9650-9667                                                                                                                                                                |                                                         |
| <i>Hodgkin - Extranodal</i>                            | Any sites                                                                      |                                                                                                                                                                          |                                                         |
| Non-Hodgkin Lymphoma                                   |                                                                                |                                                                                                                                                                          | -                                                       |
| <i>Non-Hodgkin Lymphoma – Nodal</i>                    | C024, C098, C099, C111, C142, C379, C422, C770-C779                            | 9590-9597, 9670-9671, 9673, 9675, 9678-9680, 9684, 9687-9691, 9695, 9698-9702, 9705, 9708-9709, 9712, 9714-9719, 9724-9729, 9735, 9737-9738, 9811-9818, 9823, 9827, 9837 |                                                         |
| <i>Non-Hodgkin Lymphoma – Extranodal</i>               | All sites except C024, C098-C099, C111, C142, C379, C422, C770-C779            | 9590-9597, 9670-9671, 9673, 9675, 9678-9680, 9684, 9687, 9688, 9689-9691, 9695, 9698-9702, 9705, 9708-9709, 9712, 9714-9719, 9724-9729, 9735, 9737, 9738                 |                                                         |
|                                                        | All sites except C024, C098-C099, C111, C142, C379, C420-C422, C424, C770-C779 | 9811-9818, 9823, 9827, 9837                                                                                                                                              |                                                         |
| <i>Chronic Lymphocytic Leukemia</i>                    | C420, C421, C424                                                               | 9823                                                                                                                                                                     |                                                         |
| Myeloma                                                | Any sites                                                                      | 9731-9732, 9734                                                                                                                                                          | -                                                       |
| Acute Non-Lymphocytic Leukemia                         |                                                                                |                                                                                                                                                                          | -                                                       |

| Cancer Types                                              | ICD-O-3 Site                          | ICD-O-3 Histology                                                                                   | Definitions of same-site subsequent cancer <sup>a</sup>          |
|-----------------------------------------------------------|---------------------------------------|-----------------------------------------------------------------------------------------------------|------------------------------------------------------------------|
| <i>Acute Myeloid Leukemia</i>                             | Any sites                             | 9840, 9861, 9865-9867, 9869, 9871-9874, 9895-9897, 9898, 9910-9911, 9920                            | Acute Non-Lymphocytic Leukemia; <i>Chronic Myeloid Leukemia</i>  |
| <i>Acute Monocytic Leukemia</i>                           | Any sites                             | 9891                                                                                                |                                                                  |
| <i>Other Acute Leukemia</i>                               | Any sites                             | 9801, 9805-9809, 9931                                                                               |                                                                  |
| <i>Acute Lymphocytic Leukemia</i>                         | Any sites                             | 9826, 9835-9836                                                                                     | -                                                                |
|                                                           | C420, C421, C424                      | 9811-9818, 9837                                                                                     | -                                                                |
| <i>Chronic Myeloid Leukemia</i>                           | Any sites                             | 9863, 9875-9876, 9945-9946                                                                          | <i>Chronic Myeloid Leukemia</i> ; Acute Non-Lymphocytic Leukemia |
| Other Leukemia <sup>b</sup>                               |                                       |                                                                                                     | -                                                                |
| <i>Other Lymphocytic Leukemia</i>                         | Any sites                             | 9820, 9832-9834, 9940                                                                               | -                                                                |
| <i>Other Myeloid/Monocytic Leukemia</i>                   | Any sites                             | 9860, 9930                                                                                          | -                                                                |
| <i>Aleukemic, subleukemic and Not Otherwise Specified</i> | Any sites                             | 9733, 9742, 9800, 9831, 9870, 9948, 9963-9964                                                       | -                                                                |
|                                                           | C420, C421, C424                      | 9827                                                                                                | -                                                                |
| Mesothelioma <sup>b</sup>                                 |                                       | 9050-9055                                                                                           | -                                                                |
| Kaposi Sarcoma                                            |                                       | 9140                                                                                                |                                                                  |
| Miscellaneous <sup>b</sup>                                |                                       | 9740-9741, 9750-9769, 9950, 9960-9962, 9965-9967, 9970-9971, 9975, 9980, 9982-9987, 9989, 9991-9992 | -                                                                |
|                                                           | C760-C768, C809, C420-C424, C770-C779 | All histologies excluding 9050-9055, 9140, 9590-9992                                                | -                                                                |

NOTE Modified from the Site Recode ICD-O-3/WHO 2008 Definition by SEER program ([https://seer.cancer.gov/siterecode/icdo3\\_dwhohome/index.html](https://seer.cancer.gov/siterecode/icdo3_dwhohome/index.html)).

<sup>a</sup>Indicated only when it is different from the first primary cancer

<sup>b</sup>Combined as a group, "Other and unspecified primary sites", in the main analysis.

**eTable3. Cancers grouped by risk factors including smoking, obesity, infection, and alcohol consumption**

| <i>Smoking-associated cancers</i> <sup>13</sup>   | <i>Classification</i>                                                                                                                                                                                                                                                                                                                                                                                                                                                                                                                                                                                                                                                                                                                                                                                                                                                                                                                                                                                                                                                                                                                                                                                                                                                                                                                                                                                                                                                                                                                                                                                                              |
|---------------------------------------------------|------------------------------------------------------------------------------------------------------------------------------------------------------------------------------------------------------------------------------------------------------------------------------------------------------------------------------------------------------------------------------------------------------------------------------------------------------------------------------------------------------------------------------------------------------------------------------------------------------------------------------------------------------------------------------------------------------------------------------------------------------------------------------------------------------------------------------------------------------------------------------------------------------------------------------------------------------------------------------------------------------------------------------------------------------------------------------------------------------------------------------------------------------------------------------------------------------------------------------------------------------------------------------------------------------------------------------------------------------------------------------------------------------------------------------------------------------------------------------------------------------------------------------------------------------------------------------------------------------------------------------------|
| Oral Cavity and Pharynx                           | eTable2                                                                                                                                                                                                                                                                                                                                                                                                                                                                                                                                                                                                                                                                                                                                                                                                                                                                                                                                                                                                                                                                                                                                                                                                                                                                                                                                                                                                                                                                                                                                                                                                                            |
| Esophagus                                         | eTable2                                                                                                                                                                                                                                                                                                                                                                                                                                                                                                                                                                                                                                                                                                                                                                                                                                                                                                                                                                                                                                                                                                                                                                                                                                                                                                                                                                                                                                                                                                                                                                                                                            |
| Stomach                                           | eTable2                                                                                                                                                                                                                                                                                                                                                                                                                                                                                                                                                                                                                                                                                                                                                                                                                                                                                                                                                                                                                                                                                                                                                                                                                                                                                                                                                                                                                                                                                                                                                                                                                            |
| Colon and Rectum                                  | eTable2                                                                                                                                                                                                                                                                                                                                                                                                                                                                                                                                                                                                                                                                                                                                                                                                                                                                                                                                                                                                                                                                                                                                                                                                                                                                                                                                                                                                                                                                                                                                                                                                                            |
| Liver and Intrahepatic Bile Duct                  | eTable2                                                                                                                                                                                                                                                                                                                                                                                                                                                                                                                                                                                                                                                                                                                                                                                                                                                                                                                                                                                                                                                                                                                                                                                                                                                                                                                                                                                                                                                                                                                                                                                                                            |
| Pancreas                                          | eTable2                                                                                                                                                                                                                                                                                                                                                                                                                                                                                                                                                                                                                                                                                                                                                                                                                                                                                                                                                                                                                                                                                                                                                                                                                                                                                                                                                                                                                                                                                                                                                                                                                            |
| Larynx                                            | eTable2                                                                                                                                                                                                                                                                                                                                                                                                                                                                                                                                                                                                                                                                                                                                                                                                                                                                                                                                                                                                                                                                                                                                                                                                                                                                                                                                                                                                                                                                                                                                                                                                                            |
| Lung and Bronchus                                 | eTable2                                                                                                                                                                                                                                                                                                                                                                                                                                                                                                                                                                                                                                                                                                                                                                                                                                                                                                                                                                                                                                                                                                                                                                                                                                                                                                                                                                                                                                                                                                                                                                                                                            |
| Cervix Uteri                                      | eTable2                                                                                                                                                                                                                                                                                                                                                                                                                                                                                                                                                                                                                                                                                                                                                                                                                                                                                                                                                                                                                                                                                                                                                                                                                                                                                                                                                                                                                                                                                                                                                                                                                            |
| Kidney and Renal Pelvis                           | eTable2                                                                                                                                                                                                                                                                                                                                                                                                                                                                                                                                                                                                                                                                                                                                                                                                                                                                                                                                                                                                                                                                                                                                                                                                                                                                                                                                                                                                                                                                                                                                                                                                                            |
| Urinary Bladder                                   | eTable2                                                                                                                                                                                                                                                                                                                                                                                                                                                                                                                                                                                                                                                                                                                                                                                                                                                                                                                                                                                                                                                                                                                                                                                                                                                                                                                                                                                                                                                                                                                                                                                                                            |
| Acute Non-Lymphocytic Leukemia                    | eTable2                                                                                                                                                                                                                                                                                                                                                                                                                                                                                                                                                                                                                                                                                                                                                                                                                                                                                                                                                                                                                                                                                                                                                                                                                                                                                                                                                                                                                                                                                                                                                                                                                            |
| <i>Obesity-associated cancers</i> <sup>14</sup>   | <i>Classification</i>                                                                                                                                                                                                                                                                                                                                                                                                                                                                                                                                                                                                                                                                                                                                                                                                                                                                                                                                                                                                                                                                                                                                                                                                                                                                                                                                                                                                                                                                                                                                                                                                              |
| Gallbladder and Other Biliary                     | eTable2                                                                                                                                                                                                                                                                                                                                                                                                                                                                                                                                                                                                                                                                                                                                                                                                                                                                                                                                                                                                                                                                                                                                                                                                                                                                                                                                                                                                                                                                                                                                                                                                                            |
| Pancreas                                          | eTable2                                                                                                                                                                                                                                                                                                                                                                                                                                                                                                                                                                                                                                                                                                                                                                                                                                                                                                                                                                                                                                                                                                                                                                                                                                                                                                                                                                                                                                                                                                                                                                                                                            |
| Stomach Cardia                                    | {Site and Morphology.Site recode ICD-O-3/WHO 2008} = ' Stomach'<br>AND {Site and Morphology.Primary Site - labeled} = 'C16.0-Cardia, NOS'                                                                                                                                                                                                                                                                                                                                                                                                                                                                                                                                                                                                                                                                                                                                                                                                                                                                                                                                                                                                                                                                                                                                                                                                                                                                                                                                                                                                                                                                                          |
| Thyroid                                           | eTable2                                                                                                                                                                                                                                                                                                                                                                                                                                                                                                                                                                                                                                                                                                                                                                                                                                                                                                                                                                                                                                                                                                                                                                                                                                                                                                                                                                                                                                                                                                                                                                                                                            |
| Kidney and Renal Pelvis                           | eTable2                                                                                                                                                                                                                                                                                                                                                                                                                                                                                                                                                                                                                                                                                                                                                                                                                                                                                                                                                                                                                                                                                                                                                                                                                                                                                                                                                                                                                                                                                                                                                                                                                            |
| Esophageal Adenocarcinoma                         | {Site and Morphology.Site recode ICD-O-3/WHO 2008} = ' Esophagus' AND {Site and Morphology.ICD-O-3 Hist/behav, malignant} = '8140/3: Adenocarcinoma, NOS','8141/3: Scirrhus adenocarcinoma','8143/3: Superficial spreading adenocarcinoma','8144/3: Adenocarcinoma, intestinal type','8145/3: Carcinoma, diffuse type','8190/3: Trabecular adenocarcinoma','8200/3: Adenoid cystic carcinoma','8201/3: Cribriform carcinoma, NOS','8210/3: Adenocarcinoma in adenomatous polyp','8211/3: Tubular adenocarcinoma','8213/3: Serrated adenocarcinoma','8214/3: Parietal cell carcinoma','8215/3: Adenocarcinoma of anal glands','8220/3: Adenocarcinoma in adenomatous polyposis coli','8221/3: Adenocarcinoma in multiple adenomatous polyps','8230/3: Solid carcinoma, NOS','8231/3: Carcinoma simplex','8260/3: Papillary adenocarcinoma, NOS','8261/3: Adenocarcinoma in villous adenoma','8262/3: Villous adenocarcinoma','8263/3: Adenocarcinoma in tubulovillous adenoma','8310/3: Clear cell adenocarcinoma, NOS','8401/3: Apocrine adenocarcinoma','8480/3: Mucinous adenocarcinoma','8481/3: Mucin-producing adenocarcinoma','8482/3: Mucinous adenocarcinoma, endocervical type','8490/3: Signet ring cell carcinoma','8550/3: Acinar cell carcinoma','8551/3: Acinar cell cystadenocarcinoma','8570/3: Adenocarcinoma with squamous metaplasia','8571/3: Adenocarcinoma with cartilaginous and osseous metaplasia','8572/3: Adenocarcinoma with spindle cell metaplasia','8573/3: Adenocarcinoma with apocrine metaplasia','8574/3: Adenocarcinoma with neuroendocrine differentiation','8576/3: Hepatoid adenocarcinoma' |
| Colon and Rectum                                  | eTable2                                                                                                                                                                                                                                                                                                                                                                                                                                                                                                                                                                                                                                                                                                                                                                                                                                                                                                                                                                                                                                                                                                                                                                                                                                                                                                                                                                                                                                                                                                                                                                                                                            |
| Corpus and Uterus, NOS                            | eTable2                                                                                                                                                                                                                                                                                                                                                                                                                                                                                                                                                                                                                                                                                                                                                                                                                                                                                                                                                                                                                                                                                                                                                                                                                                                                                                                                                                                                                                                                                                                                                                                                                            |
| Breast                                            | eTable2                                                                                                                                                                                                                                                                                                                                                                                                                                                                                                                                                                                                                                                                                                                                                                                                                                                                                                                                                                                                                                                                                                                                                                                                                                                                                                                                                                                                                                                                                                                                                                                                                            |
| Ovary                                             | eTable2                                                                                                                                                                                                                                                                                                                                                                                                                                                                                                                                                                                                                                                                                                                                                                                                                                                                                                                                                                                                                                                                                                                                                                                                                                                                                                                                                                                                                                                                                                                                                                                                                            |
| Multiple Myeloma                                  | {Site and Morphology.Site recode ICD-O-3/WHO 2008} = ' Myeloma'<br>AND {Site and Morphology.ICD-O-3 Hist/behavior, labeled} = '9732/3: Plasma cell (multiple) myeloma'                                                                                                                                                                                                                                                                                                                                                                                                                                                                                                                                                                                                                                                                                                                                                                                                                                                                                                                                                                                                                                                                                                                                                                                                                                                                                                                                                                                                                                                             |
| Liver and Intrahepatic Bile Duct                  | eTable2                                                                                                                                                                                                                                                                                                                                                                                                                                                                                                                                                                                                                                                                                                                                                                                                                                                                                                                                                                                                                                                                                                                                                                                                                                                                                                                                                                                                                                                                                                                                                                                                                            |
| <i>Infection-associated cancers</i> <sup>16</sup> | <i>Classification</i>                                                                                                                                                                                                                                                                                                                                                                                                                                                                                                                                                                                                                                                                                                                                                                                                                                                                                                                                                                                                                                                                                                                                                                                                                                                                                                                                                                                                                                                                                                                                                                                                              |
| Oral Cavity and Pharynx (only HPV associated)     | {Site and Morphology.Site recode ICD-O-3/WHO 2008} = ' Oral Cavity and Pharynx'<br>AND {Site and Morphology.Primary Site - labeled} = 'C01.9-Base of tongue, NOS','C02.4-Lingual tonsil','C09.0-Tonsillar fossa','C09.1-Tonsillar pillar','C09.8-Overlapping lesion of tonsil','C09.9-Tonsil, NOS','C10.0-Vallecula','C10.1-Anterior                                                                                                                                                                                                                                                                                                                                                                                                                                                                                                                                                                                                                                                                                                                                                                                                                                                                                                                                                                                                                                                                                                                                                                                                                                                                                               |

|                                                |                                                                                                                                                                                                                                                                                                                                                                                                                                                                                                                                                                                                                                                                                                                                                                                                                                                                                          |
|------------------------------------------------|------------------------------------------------------------------------------------------------------------------------------------------------------------------------------------------------------------------------------------------------------------------------------------------------------------------------------------------------------------------------------------------------------------------------------------------------------------------------------------------------------------------------------------------------------------------------------------------------------------------------------------------------------------------------------------------------------------------------------------------------------------------------------------------------------------------------------------------------------------------------------------------|
| Stomach Non-cardia                             | surface of epiglottis','C10.2-Lateral wall of oropharynx','C10.3-Posterior wall of oropharynx','C10.4-Branchial cleft','C10.8-Overlapping lesion of oropharynx','C10.9-Oropharynx, NOS','C14.2-Waldeyers ring'<br>{Site and Morphology.Site recode ICD-O-3/WHO 2008} = ' Stomach'<br>AND {Site and Morphology.Primary Site - labeled} = 'C16.1-Fundus of stomach','C16.2-Body of stomach','C16.3-Gastric antrum','C16.4-Pylorus','C16.5-Lesser curvature of stomach NOS','C16.6-Greater curvature of stomach NOS','C16.8-Overlapping lesion of stomach','C16.9-Stomach, NOS'                                                                                                                                                                                                                                                                                                             |
| Liver and Intrahepatic Bile Duct               | eTable2                                                                                                                                                                                                                                                                                                                                                                                                                                                                                                                                                                                                                                                                                                                                                                                                                                                                                  |
| Anus, Anal Canal and Anorectum                 | eTable2                                                                                                                                                                                                                                                                                                                                                                                                                                                                                                                                                                                                                                                                                                                                                                                                                                                                                  |
| Cervix                                         | eTable2                                                                                                                                                                                                                                                                                                                                                                                                                                                                                                                                                                                                                                                                                                                                                                                                                                                                                  |
| Vulva and vagina                               | C529, C510-C519                                                                                                                                                                                                                                                                                                                                                                                                                                                                                                                                                                                                                                                                                                                                                                                                                                                                          |
| Penis                                          | C600-C609                                                                                                                                                                                                                                                                                                                                                                                                                                                                                                                                                                                                                                                                                                                                                                                                                                                                                |
| Hodgkin Lymphoma                               | eTable2                                                                                                                                                                                                                                                                                                                                                                                                                                                                                                                                                                                                                                                                                                                                                                                                                                                                                  |
| Non-Hodgkin Lymphoma                           | eTable2                                                                                                                                                                                                                                                                                                                                                                                                                                                                                                                                                                                                                                                                                                                                                                                                                                                                                  |
| Kaposi Sarcoma                                 | eTable2                                                                                                                                                                                                                                                                                                                                                                                                                                                                                                                                                                                                                                                                                                                                                                                                                                                                                  |
| <hr/>                                          |                                                                                                                                                                                                                                                                                                                                                                                                                                                                                                                                                                                                                                                                                                                                                                                                                                                                                          |
| <i>Alcohol-associated cancers<sup>15</sup></i> | <i>Classification</i>                                                                                                                                                                                                                                                                                                                                                                                                                                                                                                                                                                                                                                                                                                                                                                                                                                                                    |
| Oral Cavity and Pharynx                        | eTable2                                                                                                                                                                                                                                                                                                                                                                                                                                                                                                                                                                                                                                                                                                                                                                                                                                                                                  |
| Esophageal Squamous Cell Carcinoma             | {Site and Morphology.Site recode ICD-O-3/WHO 2008} = ' Esophagus' AND {Site and Morphology.ICD-O-3 Hist/behavior, malig, labeled}2 = '8050/3: Papillary carcinoma, NOS','8051/3: Verrucous carcinoma, NOS','8052/3: Papillary squamous cell carcinoma','8053/3: Papillary squamous cell carcinoma, inverted','8070/3: Squamous cell carcinoma, NOS','8071/3: Squamous cell carcinoma, keratinizing, NOS','8072/3: Squamous cell ca., large cell, nonkeratinizing','8073/3: Squamous cell ca., small cell, nonkeratinizing','8074/3: Squamous cell carcinoma, spindle cell','8075/3: Squamous cell carcinoma, adenoid','8076/3: Squamous cell carcinoma, micro-invasive','8077/3: Squamous cell ca. & Grade III','8078/3: Squamous cell carcinoma with horn formation','8080/3: Queyrat erythroplasia, malignant','8081/3: Bowen disease, malignant','8082/3: Lymphoepithelial carcinoma' |
| Stomach                                        | eTable2                                                                                                                                                                                                                                                                                                                                                                                                                                                                                                                                                                                                                                                                                                                                                                                                                                                                                  |
| Colon and Rectum                               | eTable2                                                                                                                                                                                                                                                                                                                                                                                                                                                                                                                                                                                                                                                                                                                                                                                                                                                                                  |
| Liver and Intrahepatic Bile Duct               | eTable2                                                                                                                                                                                                                                                                                                                                                                                                                                                                                                                                                                                                                                                                                                                                                                                                                                                                                  |
| Larynx                                         | eTable2                                                                                                                                                                                                                                                                                                                                                                                                                                                                                                                                                                                                                                                                                                                                                                                                                                                                                  |
| Female Breast                                  | eTable2                                                                                                                                                                                                                                                                                                                                                                                                                                                                                                                                                                                                                                                                                                                                                                                                                                                                                  |
| <hr/>                                          |                                                                                                                                                                                                                                                                                                                                                                                                                                                                                                                                                                                                                                                                                                                                                                                                                                                                                          |

**eTable 4.** Number of survivors and person-years of follow-up included in the mortality analysis by first primary cancer sites and sex

| Sex          | First Primary Cancer                     | Survivors, n (%)     | Follow-up Years since 5 years from First Primary Cancer, Total (Mean) |
|--------------|------------------------------------------|----------------------|-----------------------------------------------------------------------|
| <b>Men</b>   | <b>Total</b>                             | <b>776604 (100)</b>  | <b>5436148 (7)</b>                                                    |
| <b>Men</b>   | <b>Total (excluding prostate cancer)</b> | <b>391951 (50.5)</b> | <b>2736027 (7)</b>                                                    |
| Men          | Larynx                                   | 9081 (1.2)           | 60506 (6.7)                                                           |
| Men          | Hodgkin Lymphoma                         | 7211 (0.9)           | 64585 (9)                                                             |
| Men          | Kaposi Sarcoma                           | 3836 (0.5)           | 34522 (9)                                                             |
| Men          | Pancreas                                 | 1667 (0.2)           | 7811 (4.7)                                                            |
| Men          | Esophagus                                | 2736 (0.4)           | 15162 (5.5)                                                           |
| Men          | Oral Cavity and Pharynx                  | 22743 (2.9)          | 153869 (6.8)                                                          |
| Men          | Acute Lymphocytic Leukemia               | 608 (0.1)            | 4663 (7.7)                                                            |
| Men          | Gallbladder and Other Biliary            | 1005 (0.1)           | 5784 (5.8)                                                            |
| Men          | Breast                                   | 1861 (0.2)           | 12005 (6.5)                                                           |
| Men          | Lung and Bronchus                        | 20842 (2.7)          | 109376 (5.2)                                                          |
| Men          | Penis and Other Genital Organs           | 1566 (0.2)           | 10744 (6.9)                                                           |
| Men          | Chronic Myeloid Leukemia                 | 2726 (0.4)           | 17187 (6.3)                                                           |
| Men          | Anus, Anal Canal and Anorectum           | 1945 (0.3)           | 13265 (6.8)                                                           |
| Men          | Non-Hodgkin Lymphoma                     | 44041 (5.7)          | 289499 (6.6)                                                          |
| Men          | Thyroid                                  | 12333 (1.6)          | 97849 (7.9)                                                           |
| Men          | Acute Non-Lymphocytic Leukemia           | 1900 (0.2)           | 14037 (7.4)                                                           |
| Men          | Stomach                                  | 6114 (0.8)           | 37157 (6.1)                                                           |
| Men          | Eye and Orbit                            | 1609 (0.2)           | 11679 (7.3)                                                           |
| Men          | Soft Tissue including Heart              | 5080 (0.7)           | 39141 (7.7)                                                           |
| Men          | Urinary Bladder                          | 51094 (6.6)          | 346728 (6.8)                                                          |
| Men          | Kidney and Renal Pelvis                  | 25791 (3.3)          | 167127 (6.5)                                                          |
| Men          | Testis                                   | 17695 (2.3)          | 177622 (10)                                                           |
| Men          | Small Intestine                          | 2755 (0.4)           | 16957 (6.2)                                                           |
| Men          | Brain and Other Nervous System           | 4776 (0.6)           | 34058 (7.1)                                                           |
| Men          | Bones and Joints                         | 1382 (0.2)           | 11644 (8.4)                                                           |
| Men          | Myeloma                                  | 6683 (0.9)           | 29865 (4.5)                                                           |
| Men          | Colon and Rectum                         | 74184 (9.6)          | 507279 (6.8)                                                          |
| Men          | Liver and Intrahepatic Bile Duct         | 3613 (0.5)           | 16194 (4.5)                                                           |
| Men          | Melanoma of the Skin                     | 44828 (5.8)          | 358549 (8)                                                            |
| Men          | Prostate                                 | 384653 (49.5)        | 2700121 (7)                                                           |
| Men          | Remaining values                         | 10246 (1.3)          | 71166 (6.9)                                                           |
| <b>Women</b> | <b>Total</b>                             | <b>745550 (100)</b>  | <b>5658681 (7.6)</b>                                                  |
| Women        | Larynx                                   | 2087 (0.3)           | 13691 (6.6)                                                           |
| Women        | Esophagus                                | 845 (0.1)            | 4615 (5.5)                                                            |
| Women        | Hodgkin Lymphoma                         | 6223 (0.8)           | 58530 (9.4)                                                           |
| Women        | Acute Lymphocytic Leukemia               | 483 (0.1)            | 3566 (7.4)                                                            |
| Women        | Anus, Anal Canal and Anorectum           | 3027 (0.4)           | 20608 (6.8)                                                           |
| Women        | Oral Cavity and Pharynx                  | 10680 (1.4)          | 76049 (7.1)                                                           |
| Women        | Pancreas                                 | 1665 (0.2)           | 8728 (5.2)                                                            |
| Women        | Kaposi Sarcoma                           | 164 (0)              | 1012 (6.2)                                                            |

|       |                                  |               |               |
|-------|----------------------------------|---------------|---------------|
| Women | Urinary Bladder                  | 15578 (2.1)   | 109135 (7)    |
| Women | Liver and Intrahepatic Bile Duct | 1454 (0.2)    | 6823 (4.7)    |
| Women | Non-Hodgkin Lymphoma             | 36978 (5)     | 247631 (6.7)  |
| Women | Vulva and Other Genital Organs   | 6035 (0.8)    | 43476 (7.2)   |
| Women | Gallbladder and Other Biliary    | 1308 (0.2)    | 8126 (6.2)    |
| Women | Small Intestine                  | 2493 (0.3)    | 15123 (6.1)   |
| Women | Acute Non-Lymphocytic Leukemia   | 1850 (0.2)    | 14578 (7.9)   |
| Women | Lung and Bronchus                | 24018 (3.2)   | 131531 (5.5)  |
| Women | Kidney and Renal Pelvis          | 15880 (2.1)   | 105282 (6.6)  |
| Women | Soft Tissue including Heart      | 4197 (0.6)    | 33529 (8)     |
| Women | Ovary                            | 18095 (2.4)   | 130615 (7.2)  |
| Women | Cervix Uteri                     | 19943 (2.7)   | 187717 (9.4)  |
| Women | Eye and Orbit                    | 1349 (0.2)    | 9970 (7.4)    |
| Women | Thyroid                          | 43042 (5.8)   | 348802 (8.1)  |
| Women | Breast                           | 332998 (44.7) | 2628867 (7.9) |
| Women | Colon and Rectum                 | 68385 (9.2)   | 467675 (6.8)  |
| Women | Chronic Myeloid Leukemia         | 1930 (0.3)    | 12403 (6.4)   |
| Women | Corpus and Uterus, NOS           | 62541 (8.4)   | 492687 (7.9)  |
| Women | Myeloma                          | 5549 (0.7)    | 24066 (4.3)   |
| Women | Stomach                          | 4496 (0.6)    | 27637 (6.1)   |
| Women | Melanoma of the Skin             | 39213 (5.3)   | 334637 (8.5)  |
| Women | Brain and Other Nervous System   | 4105 (0.6)    | 30842 (7.5)   |
| Women | Bones and Joints                 | 1237 (0.2)    | 10830 (8.8)   |
| Women | Remaining values                 | 7702 (1)      | 49899 (6.5)   |

---

**eTable 5.** Risks of developing or dying from subsequent primary cancers among 5-year survivors of other and unspecified primary cancer sites by sex

| Outcome   | Sex   | First Primary Cancer                  | Survivors, No. | Observed number of subsequent primary cancer cases or deaths | Incidence or Mortality per 10,000 person-years | Expected number of Subsequent Primary Cancer Cases or Deaths | Standardized Incidence Ratio or Standardized Mortality Ratio (95% CI) | Mean Age at First Primary Cancer | Mean Age at Subsequent Primary Cancer Diagnosis or Death from Subsequent Primary Cancer | Total Person-years at Risk | Mean Person-Years at Risk |
|-----------|-------|---------------------------------------|----------------|--------------------------------------------------------------|------------------------------------------------|--------------------------------------------------------------|-----------------------------------------------------------------------|----------------------------------|-----------------------------------------------------------------------------------------|----------------------------|---------------------------|
| Incidence | Men   | Mesothelioma                          | 213            | 16                                                           | 169                                            | 18                                                           | 0.9 (0.52 to 1.47)                                                    | 61.8                             | 74.4                                                                                    | 944                        | 4.4                       |
| Mortality | Men   | Mesothelioma                          | 213            | 99                                                           | 1048                                           | 8                                                            | 12.26 (9.97 to 14.93)                                                 | 61.8                             | 72.2                                                                                    | 944                        | 4.4                       |
| Incidence | Men   | Miscellaneous                         | 4126           | 623                                                          | 233                                            | 476                                                          | 1.31 (1.21 to 1.42)                                                   | 60.2                             | 72.0                                                                                    | 26684                      | 6.5                       |
| Mortality | Men   | Miscellaneous                         | 4078           | 501                                                          | 190                                            | 190                                                          | 2.64 (2.42 to 2.89)                                                   | 60.2                             | 72.2                                                                                    | 26406                      | 6.5                       |
| Incidence | Men   | Nose and Other Respiratory Organs     | 1438           | 198                                                          | 185                                            | 147                                                          | 1.35 (1.17 to 1.56)                                                   | 53.2                             | 70.5                                                                                    | 10693                      | 7.4                       |
| Mortality | Men   | Nose and Other Respiratory Organs     | 1424           | 224                                                          | 211                                            | 60                                                           | 3.73 (3.26 to 4.26)                                                   | 53.2                             | 69.1                                                                                    | 10605                      | 7.4                       |
| Incidence | Men   | Other Leukemia                        | 1951           | 301                                                          | 192                                            | 247                                                          | 1.22 (1.09 to 1.37)                                                   | 55.9                             | 70.3                                                                                    | 15716                      | 8.1                       |
| Mortality | Men   | Other Leukemia                        | 1915           | 190                                                          | 123                                            | 99                                                           | 1.91 (1.65 to 2.21)                                                   | 56.0                             | 72.0                                                                                    | 15483                      | 8.1                       |
| Incidence | Men   | Peritoneum and Other Digestive Organs | 667            | 75                                                           | 176                                            | 59                                                           | 1.26 (1 to 1.59)                                                      | 55.4                             | 68.9                                                                                    | 4256                       | 6.4                       |
| Mortality | Men   | Peritoneum and Other Digestive Organs | 666            | 156                                                          | 367                                            | 25                                                           | 6.31 (5.36 to 7.39)                                                   | 55.4                             | 65.6                                                                                    | 4255                       | 6.4                       |
| Incidence | Men   | Thymus and Other Endocrine Organs     | 1064           | 126                                                          | 169                                            | 89                                                           | 1.42 (1.18 to 1.69)                                                   | 51.2                             | 68.1                                                                                    | 7471                       | 7.0                       |
| Mortality | Men   | Thymus and Other Endocrine Organs     | 1058           | 85                                                           | 115                                            | 35                                                           | 2.4 (1.92 to 2.98)                                                    | 51.2                             | 67.3                                                                                    | 7415                       | 7.0                       |
| Incidence | Men   | Ureter and Other Urinary Organs       | 904            | 149                                                          | 241                                            | 124                                                          | 1.2 (1.02 to 1.41)                                                    | 65.1                             | 74.5                                                                                    | 6174                       | 6.8                       |
| Mortality | Men   | Ureter and Other Urinary Organs       | 892            | 103                                                          | 170                                            | 62                                                           | 1.67 (1.37 to 2.03)                                                   | 65.2                             | 77.4                                                                                    | 6058                       | 6.8                       |
| Incidence | Women | Mesothelioma                          | 178            | 7                                                            | 63                                             | 12                                                           | 0.59 (0.24 to 1.22)                                                   | 56.9                             | 64.0                                                                                    | 1115                       | 6.3                       |
| Mortality | Women | Mesothelioma                          | 175            | 71                                                           | 662                                            | 5                                                            | 15.0 (11.8 to 19.0)                                                   | 57.1                             | 70.1                                                                                    | 1072                       | 6.1                       |
| Incidence | Women | Miscellaneous                         | 2931           | 356                                                          | 187                                            | 243                                                          | 1.47 (1.32 to 1.63)                                                   | 61.4                             | 71.9                                                                                    | 19036                      | 6.5                       |
| Mortality | Women | Miscellaneous                         | 2895           | 384                                                          | 204                                            | 101                                                          | 3.79 (3.43 to 4.2)                                                    | 61.5                             | 72.6                                                                                    | 18783                      | 6.5                       |
| Incidence | Women | Nose and Other Respiratory Organs     | 902            | 103                                                          | 159                                            | 75                                                           | 1.38 (1.13 to 1.68)                                                   | 57.4                             | 67.5                                                                                    | 6472                       | 7.2                       |
| Mortality | Women | Nose and Other Respiratory Organs     | 894            | 134                                                          | 208                                            | 31                                                           | 4.26 (3.58 to 5.05)                                                   | 57.5                             | 67.6                                                                                    | 6430                       | 7.2                       |
| Incidence | Women | Other Leukemia                        | 789            | 80                                                           | 132                                            | 71                                                           | 1.12 (0.89 to 1.4)                                                    | 57.2                             | 70.8                                                                                    | 6072                       | 7.7                       |
| Mortality | Women | Other Leukemia                        | 778            | 81                                                           | 135                                            | 30                                                           | 2.74 (2.18 to 3.41)                                                   | 57.4                             | 74.4                                                                                    | 5995                       | 7.7                       |
| Incidence | Women | Peritoneum and Other Digestive Organs | 1506           | 102                                                          | 124                                            | 99                                                           | 1.03 (0.84 to 1.25)                                                   | 59.6                             | 70.6                                                                                    | 8249                       | 5.5                       |
| Mortality | Women | Peritoneum and Other Digestive Organs | 1502           | 486                                                          | 590                                            | 42                                                           | 11.71 (10.69 to 12.8)                                                 | 59.6                             | 69.3                                                                                    | 8238                       | 5.5                       |
| Incidence | Women | Thymus and Other Endocrine Organs     | 915            | 76                                                           | 124                                            | 60                                                           | 1.26 (1 to 1.58)                                                      | 53.1                             | 66.4                                                                                    | 6119                       | 6.7                       |
| Mortality | Women | Thymus and Other Endocrine Organs     | 911            | 58                                                           | 95                                             | 22                                                           | 2.59 (1.97 to 3.35)                                                   | 53.1                             | 67.5                                                                                    | 6091                       | 6.7                       |
| Incidence | Women | Ureter and Other Urinary Organs       | 552            | 71                                                           | 212                                            | 48                                                           | 1.47 (1.15 to 1.85)                                                   | 67.7                             | 77.1                                                                                    | 3342                       | 6.1                       |
| Mortality | Women | Ureter and Other Urinary Organs       | 547            | 52                                                           | 158                                            | 24                                                           | 2.2 (1.65 to 2.89)                                                    | 67.8                             | 78.8                                                                                    | 3289                       | 6.0                       |



**eTable 6.** Risks of developing specific type of subsequent primary cancer among 5-year cancer survivors in 12 SEER registries: incidence, percent contribution to the total incidence, standardized incidence ratio by first primary cancer types and sex

| Sex | First Primary Cancer (FPC)     | Subsequent Primary Cancer (SPC)  | Survivors, No. | Observed Number of SPC | Incidence per 10,000 Person-years | % Contribution to the Total Incidence | Expected Number of SPC | SIR (95% CI)         | Mean Age at FPC | Mean Age at SPC |
|-----|--------------------------------|----------------------------------|----------------|------------------------|-----------------------------------|---------------------------------------|------------------------|----------------------|-----------------|-----------------|
| M   | Acute Lymphocytic Leukemia     | Oral Cavity and Pharynx          | 612            | 10                     | 21.2                              | 0.01                                  | 1.0                    | 9.71 (4.66 to 17.85) | 38.7            | 58.7            |
| M   | Acute Non-Lymphocytic Leukemia | Colon and Rectum                 | 1907           | 13                     | 9.2                               | 0.01                                  | 12.7                   | 1.02 (0.54 to 1.75)  | 47.5            | 70.0            |
| M   | Acute Non-Lymphocytic Leukemia | Kidney and Renal Pelvis          | 1907           | 6                      | 4.3                               | 0.01                                  | 5.9                    | 1.02 (0.37 to 2.22)  | 47.5            | 63.9            |
| M   | Acute Non-Lymphocytic Leukemia | Lung and Bronchus                | 1907           | 19                     | 13.5                              | 0.02                                  | 17.2                   | 1.11 (0.67 to 1.73)  | 47.5            | 70.4            |
| M   | Acute Non-Lymphocytic Leukemia | Melanoma of the Skin             | 1907           | 7                      | 5.0                               | 0.01                                  | 7.9                    | 0.88 (0.36 to 1.82)  | 47.5            | 67.8            |
| M   | Acute Non-Lymphocytic Leukemia | Non-Hodgkin Lymphoma             | 1907           | 5                      | 3.5                               | 0.01                                  | 8.4                    | 0.6 (0.19 to 1.39)   | 47.5            | 72.5            |
| M   | Acute Non-Lymphocytic Leukemia | Oral Cavity and Pharynx          | 1907           | 21                     | 14.9                              | 0.02                                  | 4.8                    | 4.35 (2.69 to 6.65)  | 47.5            | 53.0            |
| M   | Acute Non-Lymphocytic Leukemia | Prostate                         | 1907           | 28                     | 19.9                              | 0.03                                  | 41.1                   | 0.68 (0.45 to 0.98)  | 47.5            | 64.9            |
| M   | Acute Non-Lymphocytic Leukemia | Urinary Bladder                  | 1907           | 15                     | 10.6                              | 0.02                                  | 9.3                    | 1.61 (0.9 to 2.65)   | 47.5            | 74.4            |
| M   | Anus, Anal Canal and Anorectum | Colon and Rectum                 | 1956           | 21                     | 15.7                              | 0.02                                  | 19.2                   | 1.09 (0.68 to 1.67)  | 55.8            | 67.8            |
| M   | Anus, Anal Canal and Anorectum | Esophagus                        | 1956           | 5                      | 3.7                               | 0.01                                  | 3.2                    | 1.54 (0.5 to 3.6)    | 55.8            | 64.6            |
| M   | Anus, Anal Canal and Anorectum | Larynx                           | 1956           | 7                      | 5.2                               | 0.01                                  | 2.3                    | 3.03 (1.22 to 6.23)  | 55.8            | 71.0            |
| M   | Anus, Anal Canal and Anorectum | Liver and Intrahepatic Bile Duct | 1956           | 7                      | 5.2                               | 0.01                                  | 5.3                    | 1.33 (0.53 to 2.73)  | 55.8            | 66.8            |
| M   | Anus, Anal Canal and Anorectum | Lung and Bronchus                | 1956           | 65                     | 48.7                              | 0.07                                  | 28.4                   | 2.29 (1.77 to 2.92)  | 55.8            | 67.0            |
| M   | Anus, Anal Canal and Anorectum | Melanoma of the Skin             | 1956           | 9                      | 6.7                               | 0.01                                  | 11.3                   | 0.8 (0.37 to 1.52)   | 55.8            | 72.1            |
| M   | Anus, Anal Canal and Anorectum | Non-Hodgkin Lymphoma             | 1956           | 24                     | 18.0                              | 0.03                                  | 12.5                   | 1.93 (1.23 to 2.87)  | 55.8            | 70.2            |
| M   | Anus, Anal Canal and Anorectum | Oral Cavity and Pharynx          | 1956           | 17                     | 12.7                              | 0.02                                  | 6.4                    | 2.64 (1.54 to 4.23)  | 55.8            | 65.2            |
| M   | Anus, Anal Canal and Anorectum | Pancreas                         | 1956           | 6                      | 4.5                               | 0.01                                  | 6.2                    | 0.97 (0.36 to 2.12)  | 55.8            | 65.0            |
| M   | Anus, Anal Canal and Anorectum | Prostate                         | 1956           | 25                     | 18.7                              | 0.03                                  | 63.6                   | 0.39 (0.25 to 0.58)  | 55.8            | 74.5            |
| M   | Anus, Anal Canal and Anorectum | Stomach                          | 1956           | 5                      | 3.7                               | 0.01                                  | 4.1                    | 1.21 (0.39 to 2.82)  | 55.8            | 75.1            |
| M   | Anus, Anal Canal and Anorectum | Urinary Bladder                  | 1956           | 23                     | 17.2                              | 0.03                                  | 15.7                   | 1.47 (0.93 to 2.2)   | 55.8            | 68.9            |
| M   | Bones and Joints               | Acute Non-Lymphocytic Leukemia   | 1402           | 7                      | 5.9                               | 0.01                                  | 1.1                    | 6.61 (2.66 to 13.61) | 44.5            | 60.6            |
| M   | Bones and Joints               | Colon and Rectum                 | 1402           | 9                      | 7.6                               | 0.01                                  | 10.1                   | 0.89 (0.41 to 1.69)  | 44.5            | 61.1            |
| M   | Bones and Joints               | Lung and Bronchus                | 1402           | 11                     | 9.3                               | 0.01                                  | 13.5                   | 0.81 (0.41 to 1.45)  | 44.5            | 71.0            |
| M   | Bones and Joints               | Non-Hodgkin Lymphoma             | 1402           | 5                      | 4.2                               | 0.01                                  | 6.5                    | 0.76 (0.25 to 1.78)  | 44.5            | 70.0            |
| M   | Bones and Joints               | Oral Cavity and Pharynx          | 1402           | 5                      | 4.2                               | 0.01                                  | 3.6                    | 1.39 (0.45 to 3.24)  | 44.5            | 50.8            |
| M   | Bones and Joints               | Prostate                         | 1402           | 29                     | 24.5                              | 0.03                                  | 31.2                   | 0.93 (0.62 to 1.33)  | 44.5            | 68.2            |
| M   | Bones and Joints               | Soft Tissue including Heart      | 1402           | 5                      | 4.2                               | 0.01                                  | 0.7                    | 6.76 (2.19 to 15.77) | 44.5            | 57.5            |
| M   | Brain and Other Nervous System | Acute Non-Lymphocytic Leukemia   | 4817           | 11                     | 3.2                               | 0.01                                  | 2.3                    | 4.87 (2.43 to 8.71)  | 42.0            | 51.1            |

| Sex | First Primary Cancer (FPC)     | Subsequent Primary Cancer (SPC)  | Survivors, No. | Observed Number of SPC | Incidence per 10,000 Person-years | % Contribution to the Total Incidence | Expected Number of SPC | SIR (95% CI)           | Mean Age at FPC | Mean Age at SPC |
|-----|--------------------------------|----------------------------------|----------------|------------------------|-----------------------------------|---------------------------------------|------------------------|------------------------|-----------------|-----------------|
| M   | Brain and Other Nervous System | Colon and Rectum                 | 4817           | 25                     | 7.3                               | 0.03                                  | 22.6                   | 1.11 (0.72 to 1.63)    | 42.0            | 60.6            |
| M   | Brain and Other Nervous System | Esophagus                        | 4817           | 7                      | 2.0                               | 0.01                                  | 3.7                    | 1.91 (0.77 to 3.94)    | 42.0            | 61.3            |
| M   | Brain and Other Nervous System | Kidney and Renal Pelvis          | 4817           | 15                     | 4.4                               | 0.02                                  | 10.8                   | 1.38 (0.78 to 2.28)    | 42.0            | 60.7            |
| M   | Brain and Other Nervous System | Lung and Bronchus                | 4817           | 27                     | 7.9                               | 0.03                                  | 27.2                   | 0.99 (0.66 to 1.45)    | 42.0            | 63.0            |
| M   | Brain and Other Nervous System | Melanoma of the Skin             | 4817           | 18                     | 5.2                               | 0.02                                  | 15.3                   | 1.18 (0.7 to 1.86)     | 42.0            | 61.8            |
| M   | Brain and Other Nervous System | Non-Hodgkin Lymphoma             | 4817           | 20                     | 5.8                               | 0.02                                  | 15.0                   | 1.33 (0.81 to 2.06)    | 42.0            | 64.1            |
| M   | Brain and Other Nervous System | Oral Cavity and Pharynx          | 4817           | 8                      | 2.3                               | 0.01                                  | 9.3                    | 0.86 (0.37 to 1.69)    | 42.0            | 51.1            |
| M   | Brain and Other Nervous System | Prostate                         | 4817           | 64                     | 18.6                              | 0.07                                  | 69.4                   | 0.92 (0.71 to 1.18)    | 42.0            | 62.9            |
| M   | Brain and Other Nervous System | Stomach                          | 4817           | 5                      | 1.5                               | 0.01                                  | 4.6                    | 1.1 (0.36 to 2.56)     | 42.0            | 62.8            |
| M   | Brain and Other Nervous System | Thyroid                          | 4817           | 8                      | 2.3                               | 0.01                                  | 3.8                    | 2.13 (0.92 to 4.19)    | 42.0            | 56.1            |
| M   | Brain and Other Nervous System | Urinary Bladder                  | 4817           | 9                      | 2.6                               | 0.01                                  | 15.0                   | 0.6 (0.27 to 1.14)     | 42.0            | 68.5            |
| M   | Breast                         | Acute Non-Lymphocytic Leukemia   | 1878           | 5                      | 4.1                               | 0.01                                  | 2.8                    | 1.8 (0.58 to 4.19)     | 63.1            | 69.7            |
| M   | Breast                         | Brain and Other Nervous System   | 1878           | 5                      | 4.1                               | 0.01                                  | 2.6                    | 1.95 (0.64 to 4.56)    | 63.1            | 72.4            |
| M   | Breast                         | Colon and Rectum                 | 1878           | 27                     | 22.2                              | 0.03                                  | 24.4                   | 1.11 (0.73 to 1.61)    | 63.1            | 75.0            |
| M   | Breast                         | Kidney and Renal Pelvis          | 1878           | 7                      | 5.7                               | 0.01                                  | 9.3                    | 0.75 (0.3 to 1.55)     | 63.1            | 77.9            |
| M   | Breast                         | Larynx                           | 1878           | 5                      | 4.1                               | 0.01                                  | 2.7                    | 1.86 (0.61 to 4.35)    | 63.1            | 74.6            |
| M   | Breast                         | Liver and Intrahepatic Bile Duct | 1878           | 10                     | 8.2                               | 0.01                                  | 5.6                    | 1.78 (0.86 to 3.28)    | 63.1            | 75.8            |
| M   | Breast                         | Lung and Bronchus                | 1878           | 45                     | 37.0                              | 0.05                                  | 37.6                   | 1.2 (0.87 to 1.6)      | 63.1            | 76.3            |
| M   | Breast                         | Melanoma of the Skin             | 1878           | 12                     | 9.9                               | 0.01                                  | 13.5                   | 0.89 (0.46 to 1.55)    | 63.1            | 77.9            |
| M   | Breast                         | Non-Hodgkin Lymphoma             | 1878           | 22                     | 18.1                              | 0.02                                  | 15.6                   | 1.41 (0.88 to 2.13)    | 63.1            | 77.9            |
| M   | Breast                         | Oral Cavity and Pharynx          | 1878           | 11                     | 9.0                               | 0.01                                  | 6.8                    | 1.61 (0.81 to 2.89)    | 63.1            | 74.4            |
| M   | Breast                         | Pancreas                         | 1878           | 14                     | 11.5                              | 0.02                                  | 7.8                    | 1.78 (0.98 to 2.99)    | 63.1            | 76.7            |
| M   | Breast                         | Prostate                         | 1878           | 88                     | 72.3                              | 0.10                                  | 73.8                   | 1.19 (0.96 to 1.47)    | 63.1            | 72.6            |
| M   | Breast                         | Stomach                          | 1878           | 6                      | 4.9                               | 0.01                                  | 5.5                    | 1.1 (0.4 to 2.39)      | 63.1            | 80.0            |
| M   | Breast                         | Urinary Bladder                  | 1878           | 21                     | 17.2                              | 0.02                                  | 21.7                   | 0.97 (0.6 to 1.48)     | 63.1            | 77.4            |
| M   | Chronic Myeloid Leukemia       | Acute Lymphocytic Leukemia       | 2772           | 10                     | 5.7                               | 0.01                                  | 0.2                    | 45.56 (21.85 to 83.79) | 51.6            | 54.9            |
| M   | Chronic Myeloid Leukemia       | Colon and Rectum                 | 2772           | 20                     | 11.4                              | 0.02                                  | 18.2                   | 1.1 (0.67 to 1.69)     | 51.6            | 65.4            |
| M   | Chronic Myeloid Leukemia       | Kidney and Renal Pelvis          | 2772           | 6                      | 3.4                               | 0.01                                  | 8.2                    | 0.74 (0.27 to 1.6)     | 51.6            | 55.8            |
| M   | Chronic Myeloid Leukemia       | Lung and Bronchus                | 2772           | 26                     | 14.9                              | 0.03                                  | 25.4                   | 1.03 (0.67 to 1.5)     | 51.6            | 69.4            |
| M   | Chronic Myeloid Leukemia       | Melanoma of the Skin             | 2772           | 11                     | 6.3                               | 0.01                                  | 11.0                   | 1 (0.5 to 1.79)        | 51.6            | 60.0            |
| M   | Chronic Myeloid Leukemia       | Non-Hodgkin Lymphoma             | 2772           | 17                     | 9.7                               | 0.02                                  | 11.9                   | 1.43 (0.84 to 2.3)     | 51.6            | 65.6            |
| M   | Chronic Myeloid Leukemia       | Oral Cavity and Pharynx          | 2772           | 27                     | 15.4                              | 0.03                                  | 6.5                    | 4.13 (2.73 to 6.02)    | 51.6            | 56.6            |

| Sex | First Primary Cancer (FPC) | Subsequent Primary Cancer (SPC)  | Survivors, No. | Observed Number of SPC | Incidence per 10,000 Person-years | % Contribution to the Total Incidence | Expected Number of SPC | SIR (95% CI)        | Mean Age at FPC | Mean Age at SPC |
|-----|----------------------------|----------------------------------|----------------|------------------------|-----------------------------------|---------------------------------------|------------------------|---------------------|-----------------|-----------------|
| M   | Chronic Myeloid Leukemia   | Prostate                         | 2772           | 51                     | 29.2                              | 0.06                                  | 57.3                   | 0.89 (0.66 to 1.17) | 51.6            | 65.9            |
| M   | Chronic Myeloid Leukemia   | Thyroid                          | 2772           | 7                      | 4.0                               | 0.01                                  | 2.2                    | 3.21 (1.29 to 6.61) | 51.6            | 60.2            |
| M   | Chronic Myeloid Leukemia   | Urinary Bladder                  | 2772           | 12                     | 6.9                               | 0.01                                  | 13.9                   | 0.86 (0.45 to 1.51) | 51.6            | 70.7            |
| M   | Colon and Rectum           | Acute Lymphocytic Leukemia       | 74722          | 13                     | 0.3                               | 0.01                                  | 8.6                    | 1.52 (0.81 to 2.6)  | 63.3            | 68.9            |
| M   | Colon and Rectum           | Acute Non-Lymphocytic Leukemia   | 74722          | 163                    | 3.2                               | 0.18                                  | 119.5                  | 1.36 (1.16 to 1.59) | 63.3            | 76.4            |
| M   | Colon and Rectum           | Bones and Joints                 | 74722          | 11                     | 0.2                               | 0.01                                  | 9.9                    | 1.11 (0.56 to 1.99) | 63.3            | 63.2            |
| M   | Colon and Rectum           | Brain and Other Nervous System   | 74722          | 98                     | 1.9                               | 0.11                                  | 106.4                  | 0.92 (0.75 to 1.12) | 63.3            | 72.1            |
| M   | Colon and Rectum           | Breast                           | 74722          | 33                     | 0.6                               | 0.04                                  | 26.5                   | 1.25 (0.86 to 1.75) | 63.3            | 75.2            |
| M   | Colon and Rectum           | Chronic Myeloid Leukemia         | 74722          | 54                     | 1.1                               | 0.06                                  | 45.2                   | 1.2 (0.9 to 1.56)   | 63.3            | 77.0            |
| M   | Colon and Rectum           | Esophagus                        | 74722          | 177                    | 3.5                               | 0.20                                  | 165.3                  | 1.07 (0.92 to 1.24) | 63.3            | 75.6            |
| M   | Colon and Rectum           | Eye and Orbit                    | 74722          | 14                     | 0.3                               | 0.02                                  | 16.8                   | 0.83 (0.46 to 1.4)  | 63.3            | 75.2            |
| M   | Colon and Rectum           | Gallbladder and Other Biliary    | 74722          | 102                    | 2.0                               | 0.11                                  | 78.9                   | 1.29 (1.06 to 1.57) | 63.3            | 73.6            |
| M   | Colon and Rectum           | Hodgkin Lymphoma                 | 74722          | 15                     | 0.3                               | 0.02                                  | 22.8                   | 0.66 (0.37 to 1.09) | 63.3            | 72.9            |
| M   | Colon and Rectum           | Kaposi Sarcoma                   | 74722          | 10                     | 0.2                               | 0.01                                  | 9.1                    | 1.1 (0.53 to 2.02)  | 63.3            | 72.5            |
| M   | Colon and Rectum           | Kidney and Renal Pelvis          | 74722          | 412                    | 8.1                               | 0.46                                  | 383.7                  | 1.07 (0.97 to 1.18) | 63.3            | 73.7            |
| M   | Colon and Rectum           | Larynx                           | 74722          | 110                    | 2.2                               | 0.12                                  | 110.3                  | 1 (0.82 to 1.2)     | 63.3            | 75.4            |
| M   | Colon and Rectum           | Liver and Intrahepatic Bile Duct | 74722          | 233                    | 4.6                               | 0.26                                  | 244.2                  | 0.95 (0.84 to 1.09) | 63.3            | 72.6            |
| M   | Colon and Rectum           | Lung and Bronchus                | 74722          | 1706                   | 33.4                              | 1.92                                  | 1610.9                 | 1.06 (1.01 to 1.11) | 63.3            | 76.1            |
| M   | Colon and Rectum           | Melanoma of the Skin             | 74722          | 449                    | 8.8                               | 0.51                                  | 550.3                  | 0.82 (0.74 to 0.9)  | 63.3            | 76.5            |
| M   | Colon and Rectum           | Myeloma                          | 74722          | 183                    | 3.6                               | 0.21                                  | 190.9                  | 0.96 (0.83 to 1.11) | 63.3            | 75.8            |
| M   | Colon and Rectum           | Non-Hodgkin Lymphoma             | 74722          | 603                    | 11.8                              | 0.68                                  | 659.8                  | 0.91 (0.84 to 0.99) | 63.3            | 76.0            |
| M   | Colon and Rectum           | Oral Cavity and Pharynx          | 74722          | 309                    | 6.1                               | 0.35                                  | 281.4                  | 1.1 (0.98 to 1.23)  | 63.3            | 72.9            |
| M   | Colon and Rectum           | Pancreas                         | 74722          | 400                    | 7.8                               | 0.45                                  | 334.4                  | 1.2 (1.08 to 1.32)  | 63.3            | 74.9            |
| M   | Colon and Rectum           | Penis and Other Genital Organs   | 74722          | 33                     | 0.6                               | 0.04                                  | 25.8                   | 1.28 (0.88 to 1.8)  | 63.3            | 76.0            |
| M   | Colon and Rectum           | Prostate                         | 74722          | 2688                   | 52.6                              | 3.03                                  | 3042.2                 | 0.88 (0.85 to 0.92) | 63.3            | 73.5            |
| M   | Colon and Rectum           | Small Intestine                  | 74722          | 121                    | 2.4                               | 0.14                                  | 53.2                   | 2.27 (1.89 to 2.72) | 63.3            | 70.1            |
| M   | Colon and Rectum           | Soft Tissue including Heart      | 74722          | 72                     | 1.4                               | 0.08                                  | 65.7                   | 1.1 (0.86 to 1.38)  | 63.3            | 73.3            |
| M   | Colon and Rectum           | Stomach                          | 74722          | 273                    | 5.3                               | 0.31                                  | 245.4                  | 1.11 (0.99 to 1.25) | 63.3            | 75.2            |
| M   | Colon and Rectum           | Thyroid                          | 74722          | 71                     | 1.4                               | 0.08                                  | 72.2                   | 0.98 (0.77 to 1.24) | 63.3            | 69.2            |
| M   | Colon and Rectum           | Urinary Bladder                  | 74722          | 991                    | 19.4                              | 1.12                                  | 925.3                  | 1.07 (1.01 to 1.14) | 63.3            | 77.1            |
| M   | Esophagus                  | Acute Non-Lymphocytic Leukemia   | 2746           | 6                      | 3.9                               | 0.01                                  | 3.3                    | 1.8 (0.66 to 3.92)  | 62.8            | 68.9            |
| M   | Esophagus                  | Colon and Rectum                 | 2746           | 25                     | 16.4                              | 0.03                                  | 28.4                   | 0.88 (0.57 to 1.3)  | 62.8            | 74.9            |

| Sex | First Primary Cancer (FPC)    | Subsequent Primary Cancer (SPC)  | Survivors, No. | Observed Number of SPC | Incidence per 10,000 Person-years | % Contribution to the Total Incidence | Expected Number of SPC | SIR (95% CI)         | Mean Age at FPC | Mean Age at SPC |
|-----|-------------------------------|----------------------------------|----------------|------------------------|-----------------------------------|---------------------------------------|------------------------|----------------------|-----------------|-----------------|
| M   | Esophagus                     | Kidney and Renal Pelvis          | 2746           | 12                     | 7.9                               | 0.01                                  | 11.5                   | 1.04 (0.54 to 1.82)  | 62.8            | 69.1            |
| M   | Esophagus                     | Larynx                           | 2746           | 8                      | 5.3                               | 0.01                                  | 3.2                    | 2.47 (1.06 to 4.86)  | 62.8            | 64.0            |
| M   | Esophagus                     | Liver and Intrahepatic Bile Duct | 2746           | 8                      | 5.3                               | 0.01                                  | 7.0                    | 1.15 (0.5 to 2.26)   | 62.8            | 74.8            |
| M   | Esophagus                     | Lung and Bronchus                | 2746           | 86                     | 56.5                              | 0.10                                  | 44.7                   | 1.93 (1.54 to 2.38)  | 62.8            | 71.9            |
| M   | Esophagus                     | Melanoma of the Skin             | 2746           | 15                     | 9.9                               | 0.02                                  | 17.3                   | 0.87 (0.49 to 1.43)  | 62.8            | 71.2            |
| M   | Esophagus                     | Non-Hodgkin Lymphoma             | 2746           | 22                     | 14.4                              | 0.02                                  | 19.0                   | 1.16 (0.73 to 1.75)  | 62.8            | 75.2            |
| M   | Esophagus                     | Oral Cavity and Pharynx          | 2746           | 41                     | 26.9                              | 0.05                                  | 8.6                    | 4.75 (3.41 to 6.44)  | 62.8            | 68.9            |
| M   | Esophagus                     | Pancreas                         | 2746           | 12                     | 7.9                               | 0.01                                  | 9.4                    | 1.27 (0.66 to 2.22)  | 62.8            | 72.6            |
| M   | Esophagus                     | Prostate                         | 2746           | 96                     | 63.0                              | 0.11                                  | 90.4                   | 1.06 (0.86 to 1.3)   | 62.8            | 72.2            |
| M   | Esophagus                     | Stomach                          | 2746           | 20                     | 13.1                              | 0.02                                  | 6.4                    | 3.12 (1.9 to 4.81)   | 62.8            | 71.7            |
| M   | Esophagus                     | Urinary Bladder                  | 2746           | 33                     | 21.7                              | 0.04                                  | 25.8                   | 1.28 (0.88 to 1.79)  | 62.8            | 76.4            |
| M   | Eye and Orbit                 | Colon and Rectum                 | 1645           | 25                     | 20.8                              | 0.03                                  | 18.7                   | 1.34 (0.87 to 1.98)  | 57.9            | 77.0            |
| M   | Eye and Orbit                 | Kidney and Renal Pelvis          | 1645           | 9                      | 7.5                               | 0.01                                  | 7.7                    | 1.17 (0.54 to 2.23)  | 57.9            | 65.4            |
| M   | Eye and Orbit                 | Lung and Bronchus                | 1645           | 39                     | 32.5                              | 0.04                                  | 27.6                   | 1.41 (1 to 1.93)     | 57.9            | 73.8            |
| M   | Eye and Orbit                 | Melanoma of the Skin             | 1645           | 23                     | 19.2                              | 0.03                                  | 12.3                   | 1.87 (1.18 to 2.8)   | 57.9            | 73.1            |
| M   | Eye and Orbit                 | Non-Hodgkin Lymphoma             | 1645           | 17                     | 14.2                              | 0.02                                  | 12.8                   | 1.33 (0.78 to 2.13)  | 57.9            | 75.0            |
| M   | Eye and Orbit                 | Pancreas                         | 1645           | 8                      | 6.7                               | 0.01                                  | 6.0                    | 1.34 (0.58 to 2.65)  | 57.9            | 75.0            |
| M   | Eye and Orbit                 | Prostate                         | 1645           | 47                     | 39.1                              | 0.05                                  | 58.0                   | 0.81 (0.6 to 1.08)   | 57.9            | 71.8            |
| M   | Eye and Orbit                 | Urinary Bladder                  | 1645           | 20                     | 16.7                              | 0.02                                  | 17.0                   | 1.18 (0.72 to 1.82)  | 57.9            | 75.9            |
| M   | Gallbladder and Other Biliary | Colon and Rectum                 | 1010           | 27                     | 46.5                              | 0.03                                  | 11.0                   | 2.46 (1.62 to 3.57)  | 62.6            | 72.2            |
| M   | Gallbladder and Other Biliary | Liver and Intrahepatic Bile Duct | 1010           | 9                      | 15.5                              | 0.01                                  | 2.8                    | 3.24 (1.48 to 6.14)  | 62.6            | 68.1            |
| M   | Gallbladder and Other Biliary | Lung and Bronchus                | 1010           | 17                     | 29.2                              | 0.02                                  | 16.6                   | 1.02 (0.6 to 1.64)   | 62.6            | 76.2            |
| M   | Gallbladder and Other Biliary | Melanoma of the Skin             | 1010           | 5                      | 8.6                               | 0.01                                  | 5.7                    | 0.87 (0.28 to 2.03)  | 62.6            | 74.5            |
| M   | Gallbladder and Other Biliary | Non-Hodgkin Lymphoma             | 1010           | 6                      | 10.3                              | 0.01                                  | 6.9                    | 0.87 (0.32 to 1.9)   | 62.6            | 71.8            |
| M   | Gallbladder and Other Biliary | Pancreas                         | 1010           | 12                     | 20.6                              | 0.01                                  | 3.5                    | 3.44 (1.78 to 6)     | 62.6            | 68.9            |
| M   | Gallbladder and Other Biliary | Prostate                         | 1010           | 18                     | 31.0                              | 0.02                                  | 31.6                   | 0.57 (0.34 to 0.9)   | 62.6            | 72.8            |
| M   | Gallbladder and Other Biliary | Stomach                          | 1010           | 8                      | 13.8                              | 0.01                                  | 2.6                    | 3.04 (1.31 to 5.98)  | 62.6            | 72.4            |
| M   | Gallbladder and Other Biliary | Urinary Bladder                  | 1010           | 14                     | 24.1                              | 0.02                                  | 9.4                    | 1.48 (0.81 to 2.49)  | 62.6            | 72.8            |
| M   | Hodgkin Lymphoma              | Acute Non-Lymphocytic Leukemia   | 7278           | 28                     | 4.3                               | 0.03                                  | 4.0                    | 7.04 (4.68 to 10.17) | 40.1            | 53.8            |
| M   | Hodgkin Lymphoma              | Anus, Anal Canal and Anorectum   | 7278           | 10                     | 1.5                               | 0.01                                  | 1.6                    | 6.11 (2.93 to 11.24) | 40.1            | 50.4            |
| M   | Hodgkin Lymphoma              | Brain and Other Nervous System   | 7278           | 5                      | 0.8                               | 0.01                                  | 6.3                    | 0.8 (0.26 to 1.86)   | 40.1            | 53.7            |
| M   | Hodgkin Lymphoma              | Chronic Myeloid Leukemia         | 7278           | 5                      | 0.8                               | 0.01                                  | 1.9                    | 2.63 (0.85 to 6.13)  | 40.1            | 59.4            |

| Sex | First Primary Cancer (FPC) | Subsequent Primary Cancer (SPC)  | Survivors, No. | Observed Number of SPC | Incidence per 10,000 Person-years | % Contribution to the Total Incidence | Expected Number of SPC | SIR (95% CI)           | Mean Age at FPC | Mean Age at SPC |
|-----|----------------------------|----------------------------------|----------------|------------------------|-----------------------------------|---------------------------------------|------------------------|------------------------|-----------------|-----------------|
| M   | Hodgkin Lymphoma           | Colon and Rectum                 | 7278           | 45                     | 6.9                               | 0.05                                  | 39.2                   | 1.15 (0.84 to 1.54)    | 40.1            | 60.4            |
| M   | Hodgkin Lymphoma           | Esophagus                        | 7278           | 12                     | 1.8                               | 0.01                                  | 6.2                    | 1.94 (1 to 3.39)       | 40.1            | 61.0            |
| M   | Hodgkin Lymphoma           | Kidney and Renal Pelvis          | 7278           | 17                     | 2.6                               | 0.02                                  | 18.9                   | 0.9 (0.53 to 1.44)     | 40.1            | 63.3            |
| M   | Hodgkin Lymphoma           | Larynx                           | 7278           | 8                      | 1.2                               | 0.01                                  | 4.6                    | 1.75 (0.75 to 3.44)    | 40.1            | 70.6            |
| M   | Hodgkin Lymphoma           | Liver and Intrahepatic Bile Duct | 7278           | 10                     | 1.5                               | 0.01                                  | 11.2                   | 0.89 (0.43 to 1.64)    | 40.1            | 64.7            |
| M   | Hodgkin Lymphoma           | Lung and Bronchus                | 7278           | 104                    | 16.0                              | 0.12                                  | 46.8                   | 2.22 (1.82 to 2.69)    | 40.1            | 63.8            |
| M   | Hodgkin Lymphoma           | Melanoma of the Skin             | 7278           | 36                     | 5.5                               | 0.04                                  | 26.1                   | 1.38 (0.97 to 1.91)    | 40.1            | 57.9            |
| M   | Hodgkin Lymphoma           | Myeloma                          | 7278           | 5                      | 0.8                               | 0.01                                  | 6.7                    | 0.74 (0.24 to 1.74)    | 40.1            | 64.8            |
| M   | Hodgkin Lymphoma           | Non-Hodgkin Lymphoma             | 7278           | 110                    | 16.9                              | 0.12                                  | 26.0                   | 4.24 (3.48 to 5.11)    | 40.1            | 59.9            |
| M   | Hodgkin Lymphoma           | Oral Cavity and Pharynx          | 7278           | 43                     | 6.6                               | 0.05                                  | 15.7                   | 2.74 (1.99 to 3.7)     | 40.1            | 56.7            |
| M   | Hodgkin Lymphoma           | Pancreas                         | 7278           | 10                     | 1.5                               | 0.01                                  | 11.1                   | 0.9 (0.43 to 1.65)     | 40.1            | 69.7            |
| M   | Hodgkin Lymphoma           | Prostate                         | 7278           | 99                     | 15.2                              | 0.11                                  | 117.8                  | 0.84 (0.68 to 1.02)    | 40.1            | 63.0            |
| M   | Hodgkin Lymphoma           | Small Intestine                  | 7278           | 5                      | 0.8                               | 0.01                                  | 2.3                    | 2.17 (0.7 to 5.06)     | 40.1            | 63.1            |
| M   | Hodgkin Lymphoma           | Soft Tissue including Heart      | 7278           | 6                      | 0.9                               | 0.01                                  | 3.2                    | 1.86 (0.68 to 4.04)    | 40.1            | 59.5            |
| M   | Hodgkin Lymphoma           | Stomach                          | 7278           | 8                      | 1.2                               | 0.01                                  | 7.9                    | 1.02 (0.44 to 2.01)    | 40.1            | 69.5            |
| M   | Hodgkin Lymphoma           | Thyroid                          | 7278           | 17                     | 2.6                               | 0.02                                  | 6.7                    | 2.54 (1.48 to 4.06)    | 40.1            | 47.8            |
| M   | Hodgkin Lymphoma           | Urinary Bladder                  | 7278           | 35                     | 5.4                               | 0.04                                  | 25.6                   | 1.37 (0.95 to 1.9)     | 40.1            | 67.8            |
| M   | Kaposi Sarcoma             | Anus, Anal Canal and Anorectum   | 3962           | 83                     | 23.2                              | 0.09                                  | 1.2                    | 71.33 (56.81 to 88.42) | 43.4            | 52.0            |
| M   | Kaposi Sarcoma             | Colon and Rectum                 | 3962           | 24                     | 6.7                               | 0.03                                  | 26.7                   | 0.9 (0.58 to 1.34)     | 43.4            | 61.7            |
| M   | Kaposi Sarcoma             | Esophagus                        | 3962           | 6                      | 1.7                               | 0.01                                  | 4.1                    | 1.46 (0.54 to 3.17)    | 43.4            | 62.4            |
| M   | Kaposi Sarcoma             | Gallbladder and Other Biliary    | 3962           | 6                      | 1.7                               | 0.01                                  | 1.5                    | 3.89 (1.43 to 8.46)    | 43.4            | 64.2            |
| M   | Kaposi Sarcoma             | Hodgkin Lymphoma                 | 3962           | 12                     | 3.4                               | 0.01                                  | 1.3                    | 9.15 (4.73 to 15.99)   | 43.4            | 51.7            |
| M   | Kaposi Sarcoma             | Kidney and Renal Pelvis          | 3962           | 7                      | 2.0                               | 0.01                                  | 12.5                   | 0.56 (0.23 to 1.16)    | 43.4            | 57.3            |
| M   | Kaposi Sarcoma             | Liver and Intrahepatic Bile Duct | 3962           | 22                     | 6.2                               | 0.02                                  | 8.0                    | 2.74 (1.72 to 4.15)    | 43.4            | 55.7            |
| M   | Kaposi Sarcoma             | Lung and Bronchus                | 3962           | 23                     | 6.4                               | 0.03                                  | 31.3                   | 0.74 (0.47 to 1.1)     | 43.4            | 63.4            |
| M   | Kaposi Sarcoma             | Melanoma of the Skin             | 3962           | 14                     | 3.9                               | 0.02                                  | 16.3                   | 0.86 (0.47 to 1.45)    | 43.4            | 65.6            |
| M   | Kaposi Sarcoma             | Non-Hodgkin Lymphoma             | 3962           | 62                     | 17.3                              | 0.07                                  | 17.0                   | 3.65 (2.8 to 4.68)     | 43.4            | 52.8            |
| M   | Kaposi Sarcoma             | Oral Cavity and Pharynx          | 3962           | 36                     | 10.1                              | 0.04                                  | 10.7                   | 3.36 (2.35 to 4.65)    | 43.4            | 56.8            |
| M   | Kaposi Sarcoma             | Pancreas                         | 3962           | 9                      | 2.5                               | 0.01                                  | 7.5                    | 1.2 (0.55 to 2.27)     | 43.4            | 59.2            |
| M   | Kaposi Sarcoma             | Penis and Other Genital Organs   | 3962           | 9                      | 2.5                               | 0.01                                  | 0.6                    | 14.72 (6.73 to 27.95)  | 43.4            | 52.3            |
| M   | Kaposi Sarcoma             | Prostate                         | 3962           | 52                     | 14.5                              | 0.06                                  | 79.0                   | 0.66 (0.49 to 0.86)    | 43.4            | 67.4            |
| M   | Kaposi Sarcoma             | Urinary Bladder                  | 3962           | 20                     | 5.6                               | 0.02                                  | 17.0                   | 1.18 (0.72 to 1.82)    | 43.4            | 69.2            |

| Sex | First Primary Cancer (FPC) | Subsequent Primary Cancer (SPC)  | Survivors, No. | Observed Number of SPC | Incidence per 10,000 Person-years | % Contribution to the Total Incidence | Expected Number of SPC | SIR (95% CI)        | Mean Age at FPC | Mean Age at SPC |
|-----|----------------------------|----------------------------------|----------------|------------------------|-----------------------------------|---------------------------------------|------------------------|---------------------|-----------------|-----------------|
| M   | Kidney and Renal Pelvis    | Acute Lymphocytic Leukemia       | 25977          | 7                      | 0.4                               | 0.01                                  | 2.6                    | 2.71 (1.09 to 5.57) | 59.5            | 68.5            |
| M   | Kidney and Renal Pelvis    | Acute Non-Lymphocytic Leukemia   | 25977          | 32                     | 1.9                               | 0.04                                  | 31.9                   | 1 (0.69 to 1.42)    | 59.5            | 73.4            |
| M   | Kidney and Renal Pelvis    | Brain and Other Nervous System   | 25977          | 38                     | 2.3                               | 0.04                                  | 32.1                   | 1.19 (0.84 to 1.63) | 59.5            | 68.7            |
| M   | Kidney and Renal Pelvis    | Breast                           | 25977          | 9                      | 0.5                               | 0.01                                  | 7.5                    | 1.2 (0.55 to 2.28)  | 59.5            | 70.5            |
| M   | Kidney and Renal Pelvis    | Chronic Myeloid Leukemia         | 25977          | 17                     | 1.0                               | 0.02                                  | 12.3                   | 1.38 (0.81 to 2.22) | 59.5            | 68.0            |
| M   | Kidney and Renal Pelvis    | Colon and Rectum                 | 25977          | 239                    | 14.2                              | 0.27                                  | 282.0                  | 0.85 (0.74 to 0.96) | 59.5            | 72.1            |
| M   | Kidney and Renal Pelvis    | Esophagus                        | 25977          | 45                     | 2.7                               | 0.05                                  | 47.5                   | 0.95 (0.69 to 1.27) | 59.5            | 73.9            |
| M   | Kidney and Renal Pelvis    | Gallbladder and Other Biliary    | 25977          | 15                     | 0.9                               | 0.02                                  | 20.5                   | 0.73 (0.41 to 1.21) | 59.5            | 73.1            |
| M   | Kidney and Renal Pelvis    | Kaposi Sarcoma                   | 25977          | 6                      | 0.4                               | 0.01                                  | 2.8                    | 2.16 (0.79 to 4.7)  | 59.5            | 73.0            |
| M   | Kidney and Renal Pelvis    | Larynx                           | 25977          | 32                     | 1.9                               | 0.04                                  | 32.5                   | 0.98 (0.67 to 1.39) | 59.5            | 68.9            |
| M   | Kidney and Renal Pelvis    | Liver and Intrahepatic Bile Duct | 25977          | 89                     | 5.3                               | 0.10                                  | 74.0                   | 1.2 (0.97 to 1.48)  | 59.5            | 67.6            |
| M   | Kidney and Renal Pelvis    | Lung and Bronchus                | 25977          | 487                    | 28.9                              | 0.55                                  | 430.6                  | 1.13 (1.03 to 1.24) | 59.5            | 73.8            |
| M   | Kidney and Renal Pelvis    | Melanoma of the Skin             | 25977          | 161                    | 9.6                               | 0.18                                  | 164.1                  | 0.98 (0.84 to 1.15) | 59.5            | 71.1            |
| M   | Kidney and Renal Pelvis    | Myeloma                          | 25977          | 59                     | 3.5                               | 0.07                                  | 53.8                   | 1.1 (0.84 to 1.42)  | 59.5            | 73.3            |
| M   | Kidney and Renal Pelvis    | Non-Hodgkin Lymphoma             | 25977          | 178                    | 10.6                              | 0.20                                  | 183.9                  | 0.97 (0.83 to 1.12) | 59.5            | 73.9            |
| M   | Kidney and Renal Pelvis    | Oral Cavity and Pharynx          | 25977          | 82                     | 4.9                               | 0.09                                  | 88.0                   | 0.93 (0.74 to 1.16) | 59.5            | 68.0            |
| M   | Kidney and Renal Pelvis    | Pancreas                         | 25977          | 113                    | 6.7                               | 0.13                                  | 92.2                   | 1.23 (1.01 to 1.47) | 59.5            | 73.1            |
| M   | Kidney and Renal Pelvis    | Prostate                         | 25977          | 943                    | 56.1                              | 1.06                                  | 899.1                  | 1.05 (0.98 to 1.12) | 59.5            | 70.5            |
| M   | Kidney and Renal Pelvis    | Small Intestine                  | 25977          | 27                     | 1.6                               | 0.03                                  | 15.6                   | 1.73 (1.14 to 2.52) | 59.5            | 75.0            |
| M   | Kidney and Renal Pelvis    | Soft Tissue including Heart      | 25977          | 25                     | 1.5                               | 0.03                                  | 18.4                   | 1.36 (0.88 to 2)    | 59.5            | 65.8            |
| M   | Kidney and Renal Pelvis    | Stomach                          | 25977          | 73                     | 4.3                               | 0.08                                  | 63.2                   | 1.15 (0.91 to 1.45) | 59.5            | 73.0            |
| M   | Kidney and Renal Pelvis    | Thyroid                          | 25977          | 56                     | 3.3                               | 0.06                                  | 24.3                   | 2.31 (1.74 to 3)    | 59.5            | 67.6            |
| M   | Kidney and Renal Pelvis    | Urinary Bladder                  | 25977          | 316                    | 18.8                              | 0.36                                  | 242.6                  | 1.3 (1.16 to 1.46)  | 59.5            | 74.4            |
| M   | Larynx                     | Acute Non-Lymphocytic Leukemia   | 9107           | 19                     | 3.1                               | 0.02                                  | 13.3                   | 1.43 (0.86 to 2.24) | 62.5            | 75.3            |
| M   | Larynx                     | Anus, Anal Canal and Anorectum   | 9107           | 6                      | 1.0                               | 0.01                                  | 2.9                    | 2.11 (0.77 to 4.58) | 62.5            | 67.2            |
| M   | Larynx                     | Brain and Other Nervous System   | 9107           | 7                      | 1.2                               | 0.01                                  | 12.7                   | 0.55 (0.22 to 1.13) | 62.5            | 76.4            |
| M   | Larynx                     | Breast                           | 9107           | 5                      | 0.8                               | 0.01                                  | 3.1                    | 1.59 (0.52 to 3.72) | 62.5            | 72.2            |
| M   | Larynx                     | Chronic Myeloid Leukemia         | 9107           | 7                      | 1.2                               | 0.01                                  | 5.1                    | 1.38 (0.55 to 2.84) | 62.5            | 79.0            |
| M   | Larynx                     | Colon and Rectum                 | 9107           | 153                    | 25.2                              | 0.17                                  | 123.2                  | 1.24 (1.05 to 1.46) | 62.5            | 73.6            |
| M   | Larynx                     | Esophagus                        | 9107           | 79                     | 13.0                              | 0.09                                  | 19.8                   | 3.99 (3.16 to 4.97) | 62.5            | 70.6            |
| M   | Larynx                     | Gallbladder and Other Biliary    | 9107           | 10                     | 1.6                               | 0.01                                  | 8.6                    | 1.17 (0.56 to 2.15) | 62.5            | 71.8            |
| M   | Larynx                     | Kidney and Renal Pelvis          | 9107           | 48                     | 7.9                               | 0.05                                  | 46.5                   | 1.03 (0.76 to 1.37) | 62.5            | 72.2            |

| Sex | First Primary Cancer (FPC)       | Subsequent Primary Cancer (SPC)  | Survivors, No. | Observed Number of SPC | Incidence per 10,000 Person-years | % Contribution to the Total Incidence | Expected Number of SPC | SIR (95% CI)        | Mean Age at FPC | Mean Age at SPC |
|-----|----------------------------------|----------------------------------|----------------|------------------------|-----------------------------------|---------------------------------------|------------------------|---------------------|-----------------|-----------------|
| M   | Larynx                           | Liver and Intrahepatic Bile Duct | 9107           | 55                     | 9.1                               | 0.06                                  | 27.8                   | 1.98 (1.49 to 2.57) | 62.5            | 71.0            |
| M   | Larynx                           | Lung and Bronchus                | 9107           | 757                    | 124.7                             | 0.85                                  | 190.5                  | 3.97 (3.7 to 4.27)  | 62.5            | 72.5            |
| M   | Larynx                           | Melanoma of the Skin             | 9107           | 44                     | 7.2                               | 0.05                                  | 63.6                   | 0.69 (0.5 to 0.93)  | 62.5            | 74.8            |
| M   | Larynx                           | Myeloma                          | 9107           | 22                     | 3.6                               | 0.02                                  | 22.8                   | 0.97 (0.61 to 1.46) | 62.5            | 78.7            |
| M   | Larynx                           | Non-Hodgkin Lymphoma             | 9107           | 86                     | 14.2                              | 0.10                                  | 75.7                   | 1.14 (0.91 to 1.4)  | 62.5            | 74.9            |
| M   | Larynx                           | Oral Cavity and Pharynx          | 9107           | 247                    | 40.7                              | 0.28                                  | 34.1                   | 7.24 (6.36 to 8.2)  | 62.5            | 69.1            |
| M   | Larynx                           | Pancreas                         | 9107           | 36                     | 5.9                               | 0.04                                  | 38.4                   | 0.94 (0.66 to 1.3)  | 62.5            | 73.9            |
| M   | Larynx                           | Prostate                         | 9107           | 356                    | 58.7                              | 0.40                                  | 393.5                  | 0.91 (0.81 to 1)    | 62.5            | 73.0            |
| M   | Larynx                           | Small Intestine                  | 9107           | 8                      | 1.3                               | 0.01                                  | 6.4                    | 1.25 (0.54 to 2.47) | 62.5            | 71.1            |
| M   | Larynx                           | Soft Tissue including Heart      | 9107           | 16                     | 2.6                               | 0.02                                  | 7.4                    | 2.17 (1.24 to 3.52) | 62.5            | 74.3            |
| M   | Larynx                           | Stomach                          | 9107           | 35                     | 5.8                               | 0.04                                  | 27.3                   | 1.28 (0.89 to 1.78) | 62.5            | 74.7            |
| M   | Larynx                           | Thyroid                          | 9107           | 11                     | 1.8                               | 0.01                                  | 8.6                    | 1.27 (0.64 to 2.28) | 62.5            | 70.9            |
| M   | Larynx                           | Urinary Bladder                  | 9107           | 174                    | 28.7                              | 0.20                                  | 103.7                  | 1.68 (1.44 to 1.95) | 62.5            | 75.6            |
| M   | Liver and Intrahepatic Bile Duct | Acute Non-Lymphocytic Leukemia   | 3629           | 8                      | 4.9                               | 0.01                                  | 2.4                    | 3.31 (1.43 to 6.52) | 58.9            | 72.8            |
| M   | Liver and Intrahepatic Bile Duct | Colon and Rectum                 | 3629           | 18                     | 11.1                              | 0.02                                  | 22.6                   | 0.8 (0.47 to 1.26)  | 58.9            | 67.9            |
| M   | Liver and Intrahepatic Bile Duct | Esophagus                        | 3629           | 5                      | 3.1                               | 0.01                                  | 3.6                    | 1.4 (0.45 to 3.26)  | 58.9            | 65.3            |
| M   | Liver and Intrahepatic Bile Duct | Kidney and Renal Pelvis          | 3629           | 9                      | 5.5                               | 0.01                                  | 9.7                    | 0.93 (0.43 to 1.77) | 58.9            | 61.2            |
| M   | Liver and Intrahepatic Bile Duct | Lung and Bronchus                | 3629           | 37                     | 22.7                              | 0.04                                  | 33.0                   | 1.12 (0.79 to 1.55) | 58.9            | 67.5            |
| M   | Liver and Intrahepatic Bile Duct | Melanoma of the Skin             | 3629           | 7                      | 4.3                               | 0.01                                  | 10.3                   | 0.68 (0.27 to 1.4)  | 58.9            | 66.4            |
| M   | Liver and Intrahepatic Bile Duct | Non-Hodgkin Lymphoma             | 3629           | 19                     | 11.7                              | 0.02                                  | 13.6                   | 1.4 (0.84 to 2.18)  | 58.9            | 64.1            |
| M   | Liver and Intrahepatic Bile Duct | Oral Cavity and Pharynx          | 3629           | 12                     | 7.4                               | 0.01                                  | 7.6                    | 1.58 (0.82 to 2.76) | 58.9            | 63.4            |
| M   | Liver and Intrahepatic Bile Duct | Pancreas                         | 3629           | 5                      | 3.1                               | 0.01                                  | 7.5                    | 0.67 (0.22 to 1.56) | 58.9            | 76.2            |
| M   | Liver and Intrahepatic Bile Duct | Prostate                         | 3629           | 52                     | 31.9                              | 0.06                                  | 70.7                   | 0.74 (0.55 to 0.97) | 58.9            | 70.3            |
| M   | Liver and Intrahepatic Bile Duct | Stomach                          | 3629           | 5                      | 3.1                               | 0.01                                  | 6.1                    | 0.81 (0.26 to 1.9)  | 58.9            | 69.0            |
| M   | Liver and Intrahepatic Bile Duct | Thyroid                          | 3629           | 5                      | 3.1                               | 0.01                                  | 2.4                    | 2.09 (0.68 to 4.88) | 58.9            | 66.3            |
| M   | Liver and Intrahepatic Bile Duct | Urinary Bladder                  | 3629           | 7                      | 4.3                               | 0.01                                  | 15.8                   | 0.44 (0.18 to 0.91) | 58.9            | 72.6            |
| M   | Lung and Bronchus                | Acute Non-Lymphocytic Leukemia   | 20874          | 47                     | 4.3                               | 0.05                                  | 25.1                   | 1.87 (1.38 to 2.49) | 64.3            | 74.5            |
| M   | Lung and Bronchus                | Anus, Anal Canal and Anorectum   | 20874          | 9                      | 0.8                               | 0.01                                  | 5.1                    | 1.76 (0.81 to 3.34) | 64.3            | 68.9            |
| M   | Lung and Bronchus                | Bones and Joints                 | 20874          | 5                      | 0.5                               | 0.01                                  | 2.1                    | 2.37 (0.77 to 5.52) | 64.3            | 71.9            |
| M   | Lung and Bronchus                | Brain and Other Nervous System   | 20874          | 19                     | 1.7                               | 0.02                                  | 23.2                   | 0.82 (0.49 to 1.28) | 64.3            | 73.6            |
| M   | Lung and Bronchus                | Breast                           | 20874          | 7                      | 0.6                               | 0.01                                  | 5.7                    | 1.22 (0.49 to 2.52) | 64.3            | 70.7            |
| M   | Lung and Bronchus                | Chronic Myeloid Leukemia         | 20874          | 17                     | 1.6                               | 0.02                                  | 9.5                    | 1.78 (1.04 to 2.86) | 64.3            | 71.2            |

| Sex | First Primary Cancer (FPC) | Subsequent Primary Cancer (SPC)  | Survivors, No. | Observed Number of SPC | Incidence per 10,000 Person-years | % Contribution to the Total Incidence | Expected Number of SPC | SIR (95% CI)        | Mean Age at FPC | Mean Age at SPC |
|-----|----------------------------|----------------------------------|----------------|------------------------|-----------------------------------|---------------------------------------|------------------------|---------------------|-----------------|-----------------|
| M   | Lung and Bronchus          | Colon and Rectum                 | 20874          | 301                    | 27.5                              | 0.34                                  | 228.3                  | 1.32 (1.17 to 1.48) | 64.3            | 74.3            |
| M   | Lung and Bronchus          | Esophagus                        | 20874          | 103                    | 9.4                               | 0.12                                  | 36.1                   | 2.85 (2.33 to 3.46) | 64.3            | 70.9            |
| M   | Lung and Bronchus          | Eye and Orbit                    | 20874          | 5                      | 0.5                               | 0.01                                  | 3.6                    | 1.39 (0.45 to 3.24) | 64.3            | 73.6            |
| M   | Lung and Bronchus          | Gallbladder and Other Biliary    | 20874          | 18                     | 1.6                               | 0.02                                  | 16.4                   | 1.1 (0.65 to 1.73)  | 64.3            | 75.4            |
| M   | Lung and Bronchus          | Kidney and Renal Pelvis          | 20874          | 89                     | 8.1                               | 0.10                                  | 83.9                   | 1.06 (0.85 to 1.31) | 64.3            | 73.9            |
| M   | Lung and Bronchus          | Larynx                           | 20874          | 81                     | 7.4                               | 0.09                                  | 24.9                   | 3.25 (2.58 to 4.04) | 64.3            | 72.6            |
| M   | Lung and Bronchus          | Liver and Intrahepatic Bile Duct | 20874          | 57                     | 5.2                               | 0.06                                  | 51.7                   | 1.1 (0.84 to 1.43)  | 64.3            | 73.7            |
| M   | Lung and Bronchus          | Melanoma of the Skin             | 20874          | 103                    | 9.4                               | 0.12                                  | 116.6                  | 0.88 (0.72 to 1.07) | 64.3            | 74.8            |
| M   | Lung and Bronchus          | Myeloma                          | 20874          | 30                     | 2.7                               | 0.03                                  | 41.4                   | 0.72 (0.49 to 1.03) | 64.3            | 75.4            |
| M   | Lung and Bronchus          | Non-Hodgkin Lymphoma             | 20874          | 156                    | 14.2                              | 0.18                                  | 140.6                  | 1.11 (0.94 to 1.3)  | 64.3            | 74.9            |
| M   | Lung and Bronchus          | Oral Cavity and Pharynx          | 20874          | 124                    | 11.3                              | 0.14                                  | 61.2                   | 2.03 (1.69 to 2.42) | 64.3            | 71.6            |
| M   | Lung and Bronchus          | Pancreas                         | 20874          | 97                     | 8.9                               | 0.11                                  | 71.3                   | 1.36 (1.1 to 1.66)  | 64.3            | 74.0            |
| M   | Lung and Bronchus          | Penis and Other Genital Organs   | 20874          | 6                      | 0.5                               | 0.01                                  | 5.4                    | 1.11 (0.41 to 2.41) | 64.3            | 73.7            |
| M   | Lung and Bronchus          | Prostate                         | 20874          | 588                    | 53.7                              | 0.66                                  | 700.6                  | 0.84 (0.77 to 0.91) | 64.3            | 72.8            |
| M   | Lung and Bronchus          | Small Intestine                  | 20874          | 10                     | 0.9                               | 0.01                                  | 11.6                   | 0.87 (0.42 to 1.59) | 64.3            | 74.1            |
| M   | Lung and Bronchus          | Soft Tissue including Heart      | 20874          | 23                     | 2.1                               | 0.03                                  | 13.8                   | 1.67 (1.06 to 2.51) | 64.3            | 72.8            |
| M   | Lung and Bronchus          | Stomach                          | 20874          | 81                     | 7.4                               | 0.09                                  | 52.1                   | 1.56 (1.24 to 1.93) | 64.3            | 73.5            |
| M   | Lung and Bronchus          | Thyroid                          | 20874          | 23                     | 2.1                               | 0.03                                  | 15.5                   | 1.48 (0.94 to 2.22) | 64.3            | 70.8            |
| M   | Lung and Bronchus          | Urinary Bladder                  | 20874          | 329                    | 30.0                              | 0.37                                  | 194.9                  | 1.69 (1.51 to 1.88) | 64.3            | 75.5            |
| M   | Melanoma of the Skin       | Acute Lymphocytic Leukemia       | 46007          | 6                      | 0.2                               | 0.01                                  | 5.6                    | 1.08 (0.4 to 2.35)  | 56.3            | 64.5            |
| M   | Melanoma of the Skin       | Acute Non-Lymphocytic Leukemia   | 46007          | 64                     | 1.7                               | 0.07                                  | 62.7                   | 1.02 (0.79 to 1.3)  | 56.3            | 72.4            |
| M   | Melanoma of the Skin       | Anus, Anal Canal and Anorectum   | 46007          | 8                      | 0.2                               | 0.01                                  | 15.7                   | 0.51 (0.22 to 1)    | 56.3            | 74.7            |
| M   | Melanoma of the Skin       | Bones and Joints                 | 46007          | 7                      | 0.2                               | 0.01                                  | 6.4                    | 1.09 (0.44 to 2.25) | 56.3            | 71.8            |
| M   | Melanoma of the Skin       | Brain and Other Nervous System   | 46007          | 90                     | 2.4                               | 0.10                                  | 68.7                   | 1.31 (1.05 to 1.61) | 56.3            | 69.6            |
| M   | Melanoma of the Skin       | Breast                           | 46007          | 19                     | 0.5                               | 0.02                                  | 14.1                   | 1.34 (0.81 to 2.1)  | 56.3            | 71.1            |
| M   | Melanoma of the Skin       | Chronic Myeloid Leukemia         | 46007          | 23                     | 0.6                               | 0.03                                  | 24.6                   | 0.94 (0.59 to 1.4)  | 56.3            | 72.8            |
| M   | Melanoma of the Skin       | Colon and Rectum                 | 46007          | 412                    | 11.2                              | 0.46                                  | 531.0                  | 0.78 (0.7 to 0.86)  | 56.3            | 72.2            |
| M   | Melanoma of the Skin       | Esophagus                        | 46007          | 73                     | 2.0                               | 0.08                                  | 94.4                   | 0.77 (0.61 to 0.97) | 56.3            | 72.2            |
| M   | Melanoma of the Skin       | Eye and Orbit                    | 46007          | 23                     | 0.6                               | 0.03                                  | 11.1                   | 2.08 (1.32 to 3.12) | 56.3            | 65.1            |
| M   | Melanoma of the Skin       | Gallbladder and Other Biliary    | 46007          | 23                     | 0.6                               | 0.03                                  | 37.5                   | 0.61 (0.39 to 0.92) | 56.3            | 76.1            |
| M   | Melanoma of the Skin       | Hodgkin Lymphoma                 | 46007          | 10                     | 0.3                               | 0.01                                  | 15.9                   | 0.63 (0.3 to 1.16)  | 56.3            | 63.6            |
| M   | Melanoma of the Skin       | Kidney and Renal Pelvis          | 46007          | 256                    | 6.9                               | 0.29                                  | 228.2                  | 1.12 (0.99 to 1.27) | 56.3            | 70.0            |



| Sex | First Primary Cancer (FPC) | Subsequent Primary Cancer (SPC)  | Survivors, No. | Observed Number of SPC | Incidence per 10,000 Person-years | % Contribution to the Total Incidence | Expected Number of SPC | SIR (95% CI)          | Mean Age at FPC | Mean Age at SPC |
|-----|----------------------------|----------------------------------|----------------|------------------------|-----------------------------------|---------------------------------------|------------------------|-----------------------|-----------------|-----------------|
| M   | Melanoma of the Skin       | Larynx                           | 46007          | 27                     | 0.7                               | 0.03                                  | 61.2                   | 0.44 (0.29 to 0.64)   | 56.3            | 74.1            |
| M   | Melanoma of the Skin       | Liver and Intrahepatic Bile Duct | 46007          | 70                     | 1.9                               | 0.08                                  | 129.4                  | 0.54 (0.42 to 0.68)   | 56.3            | 70.5            |
| M   | Melanoma of the Skin       | Lung and Bronchus                | 46007          | 533                    | 14.4                              | 0.60                                  | 793.8                  | 0.67 (0.62 to 0.73)   | 56.3            | 74.4            |
| M   | Melanoma of the Skin       | Myeloma                          | 46007          | 86                     | 2.3                               | 0.10                                  | 96.5                   | 0.89 (0.71 to 1.1)    | 56.3            | 72.8            |
| M   | Melanoma of the Skin       | Non-Hodgkin Lymphoma             | 46007          | 414                    | 11.2                              | 0.47                                  | 375.2                  | 1.1 (1 to 1.22)       | 56.3            | 73.1            |
| M   | Melanoma of the Skin       | Oral Cavity and Pharynx          | 46007          | 137                    | 3.7                               | 0.15                                  | 180.5                  | 0.76 (0.64 to 0.9)    | 56.3            | 69.8            |
| M   | Melanoma of the Skin       | Pancreas                         | 46007          | 155                    | 4.2                               | 0.17                                  | 174.1                  | 0.89 (0.76 to 1.04)   | 56.3            | 73.6            |
| M   | Melanoma of the Skin       | Penis and Other Genital Organs   | 46007          | 16                     | 0.4                               | 0.02                                  | 13.5                   | 1.18 (0.68 to 1.92)   | 56.3            | 73.8            |
| M   | Melanoma of the Skin       | Prostate                         | 46007          | 1794                   | 48.6                              | 2.02                                  | 1674.9                 | 1.07 (1.02 to 1.12)   | 56.3            | 70.1            |
| M   | Melanoma of the Skin       | Small Intestine                  | 46007          | 28                     | 0.8                               | 0.03                                  | 29.3                   | 0.96 (0.64 to 1.38)   | 56.3            | 68.0            |
| M   | Melanoma of the Skin       | Soft Tissue including Heart      | 46007          | 75                     | 2.0                               | 0.08                                  | 37.7                   | 1.99 (1.57 to 2.5)    | 56.3            | 70.8            |
| M   | Melanoma of the Skin       | Stomach                          | 46007          | 69                     | 1.9                               | 0.08                                  | 110.1                  | 0.63 (0.49 to 0.79)   | 56.3            | 72.2            |
| M   | Melanoma of the Skin       | Testis                           | 46007          | 11                     | 0.3                               | 0.01                                  | 13.3                   | 0.83 (0.41 to 1.48)   | 56.3            | 52.5            |
| M   | Melanoma of the Skin       | Thyroid                          | 46007          | 75                     | 2.0                               | 0.08                                  | 52.8                   | 1.42 (1.12 to 1.78)   | 56.3            | 62.6            |
| M   | Melanoma of the Skin       | Urinary Bladder                  | 46007          | 400                    | 10.8                              | 0.45                                  | 491.8                  | 0.81 (0.74 to 0.9)    | 56.3            | 75.0            |
| M   | Myeloma                    | Acute Lymphocytic Leukemia       | 6728           | 9                      | 3.0                               | 0.01                                  | 0.4                    | 20.07 (9.18 to 38.09) | 61.1            | 65.7            |
| M   | Myeloma                    | Acute Non-Lymphocytic Leukemia   | 6728           | 41                     | 13.6                              | 0.05                                  | 5.6                    | 7.36 (5.28 to 9.99)   | 61.1            | 67.7            |
| M   | Myeloma                    | Colon and Rectum                 | 6728           | 55                     | 18.3                              | 0.06                                  | 51.4                   | 1.07 (0.81 to 1.39)   | 61.1            | 71.6            |
| M   | Myeloma                    | Esophagus                        | 6728           | 8                      | 2.7                               | 0.01                                  | 8.5                    | 0.94 (0.41 to 1.85)   | 61.1            | 75.7            |
| M   | Myeloma                    | Hodgkin Lymphoma                 | 6728           | 5                      | 1.7                               | 0.01                                  | 1.3                    | 3.94 (1.28 to 9.2)    | 61.1            | 69.5            |
| M   | Myeloma                    | Kidney and Renal Pelvis          | 6728           | 26                     | 8.6                               | 0.03                                  | 21.2                   | 1.22 (0.8 to 1.79)    | 61.1            | 67.1            |
| M   | Myeloma                    | Liver and Intrahepatic Bile Duct | 6728           | 8                      | 2.7                               | 0.01                                  | 13.7                   | 0.59 (0.25 to 1.15)   | 61.1            | 71.8            |
| M   | Myeloma                    | Lung and Bronchus                | 6728           | 61                     | 20.3                              | 0.07                                  | 79.3                   | 0.77 (0.59 to 0.99)   | 61.1            | 72.7            |
| M   | Myeloma                    | Melanoma of the Skin             | 6728           | 34                     | 11.3                              | 0.04                                  | 27.2                   | 1.25 (0.87 to 1.75)   | 61.1            | 73.5            |
| M   | Myeloma                    | Non-Hodgkin Lymphoma             | 6728           | 38                     | 12.6                              | 0.04                                  | 32.0                   | 1.19 (0.84 to 1.63)   | 61.1            | 71.1            |
| M   | Myeloma                    | Oral Cavity and Pharynx          | 6728           | 20                     | 6.6                               | 0.02                                  | 15.7                   | 1.27 (0.78 to 1.96)   | 61.1            | 69.3            |
| M   | Myeloma                    | Pancreas                         | 6728           | 13                     | 4.3                               | 0.01                                  | 16.7                   | 0.78 (0.42 to 1.33)   | 61.1            | 71.8            |
| M   | Myeloma                    | Prostate                         | 6728           | 130                    | 43.2                              | 0.15                                  | 171.2                  | 0.76 (0.64 to 0.9)    | 61.1            | 70.1            |
| M   | Myeloma                    | Soft Tissue including Heart      | 6728           | 6                      | 2.0                               | 0.01                                  | 3.2                    | 1.87 (0.69 to 4.07)   | 61.1            | 64.9            |
| M   | Myeloma                    | Stomach                          | 6728           | 13                     | 4.3                               | 0.01                                  | 11.7                   | 1.11 (0.59 to 1.9)    | 61.1            | 65.9            |
| M   | Myeloma                    | Thyroid                          | 6728           | 6                      | 2.0                               | 0.01                                  | 4.3                    | 1.41 (0.52 to 3.07)   | 61.1            | 55.6            |
| M   | Myeloma                    | Urinary Bladder                  | 6728           | 39                     | 13.0                              | 0.04                                  | 41.7                   | 0.94 (0.67 to 1.28)   | 61.1            | 72.7            |

| Sex | First Primary Cancer (FPC) | Subsequent Primary Cancer (SPC)  | Survivors, No. | Observed Number of SPC | Incidence per 10,000 Person-years | % Contribution to the Total Incidence | Expected Number of SPC | SIR (95% CI)         | Mean Age at FPC | Mean Age at SPC |
|-----|----------------------------|----------------------------------|----------------|------------------------|-----------------------------------|---------------------------------------|------------------------|----------------------|-----------------|-----------------|
| M   | Non-Hodgkin Lymphoma       | Acute Lymphocytic Leukemia       | 44576          | 14                     | 0.5                               | 0.02                                  | 4.5                    | 3.14 (1.72 to 5.27)  | 59.1            | 72.3            |
| M   | Non-Hodgkin Lymphoma       | Acute Non-Lymphocytic Leukemia   | 44576          | 223                    | 7.6                               | 0.25                                  | 53.9                   | 4.14 (3.62 to 4.72)  | 59.1            | 70.4            |
| M   | Non-Hodgkin Lymphoma       | Anus, Anal Canal and Anorectum   | 44576          | 56                     | 1.9                               | 0.06                                  | 12.6                   | 4.44 (3.35 to 5.76)  | 59.1            | 60.6            |
| M   | Non-Hodgkin Lymphoma       | Bones and Joints                 | 44576          | 7                      | 0.2                               | 0.01                                  | 5.1                    | 1.37 (0.55 to 2.82)  | 59.1            | 66.5            |
| M   | Non-Hodgkin Lymphoma       | Brain and Other Nervous System   | 44576          | 49                     | 1.7                               | 0.06                                  | 54.5                   | 0.9 (0.67 to 1.19)   | 59.1            | 67.5            |
| M   | Non-Hodgkin Lymphoma       | Breast                           | 44576          | 21                     | 0.7                               | 0.02                                  | 12.2                   | 1.72 (1.06 to 2.62)  | 59.1            | 70.0            |
| M   | Non-Hodgkin Lymphoma       | Chronic Myeloid Leukemia         | 44576          | 45                     | 1.5                               | 0.05                                  | 20.8                   | 2.16 (1.57 to 2.89)  | 59.1            | 68.9            |
| M   | Non-Hodgkin Lymphoma       | Colon and Rectum                 | 44576          | 424                    | 14.5                              | 0.48                                  | 468.0                  | 0.91 (0.82 to 1)     | 59.1            | 74.8            |
| M   | Non-Hodgkin Lymphoma       | Esophagus                        | 44576          | 82                     | 2.8                               | 0.09                                  | 78.7                   | 1.04 (0.83 to 1.29)  | 59.1            | 72.3            |
| M   | Non-Hodgkin Lymphoma       | Eye and Orbit                    | 44576          | 13                     | 0.4                               | 0.01                                  | 8.6                    | 1.52 (0.81 to 2.6)   | 59.1            | 72.4            |
| M   | Non-Hodgkin Lymphoma       | Gallbladder and Other Biliary    | 44576          | 41                     | 1.4                               | 0.05                                  | 33.9                   | 1.21 (0.87 to 1.64)  | 59.1            | 72.2            |
| M   | Non-Hodgkin Lymphoma       | Hodgkin Lymphoma                 | 44576          | 126                    | 4.3                               | 0.14                                  | 12.5                   | 10.09 (8.4 to 12.01) | 59.1            | 63.3            |
| M   | Non-Hodgkin Lymphoma       | Kaposi Sarcoma                   | 44576          | 13                     | 0.4                               | 0.01                                  | 5.2                    | 2.51 (1.33 to 4.28)  | 59.1            | 52.1            |
| M   | Non-Hodgkin Lymphoma       | Kidney and Renal Pelvis          | 44576          | 219                    | 7.5                               | 0.25                                  | 190.4                  | 1.15 (1 to 1.31)     | 59.1            | 69.2            |
| M   | Non-Hodgkin Lymphoma       | Larynx                           | 44576          | 63                     | 2.2                               | 0.07                                  | 52.4                   | 1.2 (0.92 to 1.54)   | 59.1            | 71.3            |
| M   | Non-Hodgkin Lymphoma       | Liver and Intrahepatic Bile Duct | 44576          | 107                    | 3.7                               | 0.12                                  | 116.9                  | 0.92 (0.75 to 1.11)  | 59.1            | 68.5            |
| M   | Non-Hodgkin Lymphoma       | Lung and Bronchus                | 44576          | 854                    | 29.2                              | 0.96                                  | 706.0                  | 1.21 (1.13 to 1.29)  | 59.1            | 73.1            |
| M   | Non-Hodgkin Lymphoma       | Melanoma of the Skin             | 44576          | 386                    | 13.2                              | 0.44                                  | 285.0                  | 1.35 (1.22 to 1.5)   | 59.1            | 73.1            |
| M   | Non-Hodgkin Lymphoma       | Myeloma                          | 44576          | 71                     | 2.4                               | 0.08                                  | 86.1                   | 0.82 (0.64 to 1.04)  | 59.1            | 72.1            |
| M   | Non-Hodgkin Lymphoma       | Oral Cavity and Pharynx          | 44576          | 219                    | 7.5                               | 0.25                                  | 145.6                  | 1.5 (1.31 to 1.72)   | 59.1            | 69.2            |
| M   | Non-Hodgkin Lymphoma       | Pancreas                         | 44576          | 158                    | 5.4                               | 0.18                                  | 151.6                  | 1.04 (0.89 to 1.22)  | 59.1            | 74.3            |
| M   | Non-Hodgkin Lymphoma       | Penis and Other Genital Organs   | 44576          | 18                     | 0.6                               | 0.02                                  | 11.6                   | 1.55 (0.92 to 2.45)  | 59.1            | 70.0            |
| M   | Non-Hodgkin Lymphoma       | Prostate                         | 44576          | 1352                   | 46.2                              | 1.52                                  | 1439.5                 | 0.94 (0.89 to 0.99)  | 59.1            | 71.8            |
| M   | Non-Hodgkin Lymphoma       | Small Intestine                  | 44576          | 29                     | 1.0                               | 0.03                                  | 25.2                   | 1.15 (0.77 to 1.65)  | 59.1            | 69.4            |
| M   | Non-Hodgkin Lymphoma       | Soft Tissue including Heart      | 44576          | 48                     | 1.6                               | 0.05                                  | 31.4                   | 1.53 (1.13 to 2.03)  | 59.1            | 72.3            |
| M   | Non-Hodgkin Lymphoma       | Stomach                          | 44576          | 113                    | 3.9                               | 0.13                                  | 103.0                  | 1.1 (0.9 to 1.32)    | 59.1            | 73.6            |
| M   | Non-Hodgkin Lymphoma       | Testis                           | 44576          | 7                      | 0.2                               | 0.01                                  | 8.6                    | 0.82 (0.33 to 1.68)  | 59.1            | 55.9            |
| M   | Non-Hodgkin Lymphoma       | Thyroid                          | 44576          | 59                     | 2.0                               | 0.07                                  | 40.9                   | 1.44 (1.1 to 1.86)   | 59.1            | 65.1            |
| M   | Non-Hodgkin Lymphoma       | Urinary Bladder                  | 44576          | 487                    | 16.6                              | 0.55                                  | 414.3                  | 1.18 (1.07 to 1.29)  | 59.1            | 75.0            |
| M   | Oral Cavity and Pharynx    | Acute Non-Lymphocytic Leukemia   | 22937          | 31                     | 2.0                               | 0.03                                  | 25.6                   | 1.21 (0.82 to 1.72)  | 57.5            | 69.5            |
| M   | Oral Cavity and Pharynx    | Anus, Anal Canal and Anorectum   | 22937          | 7                      | 0.5                               | 0.01                                  | 6.5                    | 1.08 (0.44 to 2.23)  | 57.5            | 64.7            |
| M   | Oral Cavity and Pharynx    | Bones and Joints                 | 22937          | 13                     | 0.8                               | 0.01                                  | 2.6                    | 5.05 (2.69 to 8.64)  | 57.5            | 61.4            |

| Sex | First Primary Cancer (FPC) | Subsequent Primary Cancer (SPC)  | Survivors, No. | Observed Number of SPC | Incidence per 10,000 Person-years | % Contribution to the Total Incidence | Expected Number of SPC | SIR (95% CI)         | Mean Age at FPC | Mean Age at SPC |
|-----|----------------------------|----------------------------------|----------------|------------------------|-----------------------------------|---------------------------------------|------------------------|----------------------|-----------------|-----------------|
| M   | Oral Cavity and Pharynx    | Brain and Other Nervous System   | 22937          | 28                     | 1.8                               | 0.03                                  | 27.8                   | 1.01 (0.67 to 1.45)  | 57.5            | 67.7            |
| M   | Oral Cavity and Pharynx    | Chronic Myeloid Leukemia         | 22937          | 13                     | 0.8                               | 0.01                                  | 10.0                   | 1.3 (0.69 to 2.22)   | 57.5            | 68.7            |
| M   | Oral Cavity and Pharynx    | Colon and Rectum                 | 22937          | 254                    | 16.4                              | 0.29                                  | 236.9                  | 1.07 (0.94 to 1.21)  | 57.5            | 72.4            |
| M   | Oral Cavity and Pharynx    | Esophagus                        | 22937          | 168                    | 10.8                              | 0.19                                  | 39.9                   | 4.21 (3.6 to 4.9)    | 57.5            | 67.1            |
| M   | Oral Cavity and Pharynx    | Gallbladder and Other Biliary    | 22937          | 27                     | 1.7                               | 0.03                                  | 16.6                   | 1.63 (1.07 to 2.37)  | 57.5            | 74.5            |
| M   | Oral Cavity and Pharynx    | Hodgkin Lymphoma                 | 22937          | 6                      | 0.4                               | 0.01                                  | 6.3                    | 0.95 (0.35 to 2.07)  | 57.5            | 69.4            |
| M   | Oral Cavity and Pharynx    | Kidney and Renal Pelvis          | 22937          | 99                     | 6.4                               | 0.11                                  | 98.6                   | 1 (0.82 to 1.22)     | 57.5            | 68.7            |
| M   | Oral Cavity and Pharynx    | Larynx                           | 22937          | 138                    | 8.9                               | 0.16                                  | 27.4                   | 5.03 (4.23 to 5.95)  | 57.5            | 66.5            |
| M   | Oral Cavity and Pharynx    | Liver and Intrahepatic Bile Duct | 22937          | 98                     | 6.3                               | 0.11                                  | 64.4                   | 1.52 (1.24 to 1.86)  | 57.5            | 67.6            |
| M   | Oral Cavity and Pharynx    | Lung and Bronchus                | 22937          | 866                    | 55.8                              | 0.98                                  | 351.0                  | 2.47 (2.31 to 2.64)  | 57.5            | 70.4            |
| M   | Oral Cavity and Pharynx    | Melanoma of the Skin             | 22937          | 170                    | 11.0                              | 0.19                                  | 138.0                  | 1.23 (1.05 to 1.43)  | 57.5            | 71.9            |
| M   | Oral Cavity and Pharynx    | Myeloma                          | 22937          | 38                     | 2.4                               | 0.04                                  | 42.5                   | 0.89 (0.63 to 1.23)  | 57.5            | 69.7            |
| M   | Oral Cavity and Pharynx    | Non-Hodgkin Lymphoma             | 22937          | 144                    | 9.3                               | 0.16                                  | 153.0                  | 0.94 (0.79 to 1.11)  | 57.5            | 71.5            |
| M   | Oral Cavity and Pharynx    | Pancreas                         | 22937          | 75                     | 4.8                               | 0.08                                  | 75.0                   | 1 (0.79 to 1.25)     | 57.5            | 71.9            |
| M   | Oral Cavity and Pharynx    | Penis and Other Genital Organs   | 22937          | 8                      | 0.5                               | 0.01                                  | 5.6                    | 1.42 (0.61 to 2.8)   | 57.5            | 74.4            |
| M   | Oral Cavity and Pharynx    | Prostate                         | 22937          | 706                    | 45.5                              | 0.80                                  | 776.2                  | 0.91 (0.84 to 0.98)  | 57.5            | 69.3            |
| M   | Oral Cavity and Pharynx    | Small Intestine                  | 22937          | 12                     | 0.8                               | 0.01                                  | 12.7                   | 0.94 (0.49 to 1.65)  | 57.5            | 70.7            |
| M   | Oral Cavity and Pharynx    | Soft Tissue including Heart      | 22937          | 33                     | 2.1                               | 0.04                                  | 15.4                   | 2.15 (1.48 to 3.02)  | 57.5            | 67.3            |
| M   | Oral Cavity and Pharynx    | Stomach                          | 22937          | 65                     | 4.2                               | 0.07                                  | 52.2                   | 1.25 (0.96 to 1.59)  | 57.5            | 71.7            |
| M   | Oral Cavity and Pharynx    | Thyroid                          | 22937          | 24                     | 1.5                               | 0.03                                  | 22.0                   | 1.09 (0.7 to 1.62)   | 57.5            | 64.2            |
| M   | Oral Cavity and Pharynx    | Urinary Bladder                  | 22937          | 208                    | 13.4                              | 0.23                                  | 195.5                  | 1.06 (0.92 to 1.22)  | 57.5            | 73.5            |
| M   | Pancreas                   | Colon and Rectum                 | 1674           | 20                     | 25.5                              | 0.02                                  | 13.1                   | 1.53 (0.93 to 2.36)  | 60.0            | 74.0            |
| M   | Pancreas                   | Kidney and Renal Pelvis          | 1674           | 5                      | 6.4                               | 0.01                                  | 5.3                    | 0.95 (0.31 to 2.21)  | 60.0            | 71.2            |
| M   | Pancreas                   | Liver and Intrahepatic Bile Duct | 1674           | 5                      | 6.4                               | 0.01                                  | 3.4                    | 1.45 (0.47 to 3.38)  | 60.0            | 65.8            |
| M   | Pancreas                   | Lung and Bronchus                | 1674           | 28                     | 35.7                              | 0.03                                  | 19.9                   | 1.41 (0.94 to 2.04)  | 60.0            | 70.1            |
| M   | Pancreas                   | Melanoma of the Skin             | 1674           | 11                     | 14.0                              | 0.01                                  | 7.4                    | 1.48 (0.74 to 2.65)  | 60.0            | 71.1            |
| M   | Pancreas                   | Myeloma                          | 1674           | 5                      | 6.4                               | 0.01                                  | 2.4                    | 2.06 (0.67 to 4.82)  | 60.0            | 69.0            |
| M   | Pancreas                   | Non-Hodgkin Lymphoma             | 1674           | 13                     | 16.6                              | 0.01                                  | 8.5                    | 1.54 (0.82 to 2.63)  | 60.0            | 72.1            |
| M   | Pancreas                   | Oral Cavity and Pharynx          | 1674           | 7                      | 8.9                               | 0.01                                  | 4.0                    | 1.75 (0.7 to 3.61)   | 60.0            | 64.1            |
| M   | Pancreas                   | Prostate                         | 1674           | 38                     | 48.4                              | 0.04                                  | 40.5                   | 0.94 (0.67 to 1.29)  | 60.0            | 73.6            |
| M   | Pancreas                   | Stomach                          | 1674           | 11                     | 14.0                              | 0.01                                  | 3.0                    | 3.63 (1.81 to 6.49)  | 60.0            | 68.6            |
| M   | Pancreas                   | Thyroid                          | 1674           | 7                      | 8.9                               | 0.01                                  | 1.1                    | 6.28 (2.52 to 12.94) | 60.0            | 62.6            |

| Sex | First Primary Cancer (FPC)     | Subsequent Primary Cancer (SPC)  | Survivors, No. | Observed Number of SPC | Incidence per 10,000 Person-years | % Contribution to the Total Incidence | Expected Number of SPC | SIR (95% CI)          | Mean Age at FPC | Mean Age at SPC |
|-----|--------------------------------|----------------------------------|----------------|------------------------|-----------------------------------|---------------------------------------|------------------------|-----------------------|-----------------|-----------------|
| M   | Pancreas                       | Urinary Bladder                  | 1674           | 13                     | 16.6                              | 0.01                                  | 11.2                   | 1.16 (0.62 to 1.99)   | 60.0            | 70.8            |
| M   | Penis and Other Genital Organs | Anus, Anal Canal and Anorectum   | 1592           | 5                      | 4.6                               | 0.01                                  | 0.5                    | 10.31 (3.35 to 24.05) | 61.5            | 67.5            |
| M   | Penis and Other Genital Organs | Colon and Rectum                 | 1592           | 24                     | 21.9                              | 0.03                                  | 20.7                   | 1.16 (0.74 to 1.73)   | 61.5            | 75.0            |
| M   | Penis and Other Genital Organs | Kidney and Renal Pelvis          | 1592           | 5                      | 4.6                               | 0.01                                  | 7.6                    | 0.66 (0.21 to 1.54)   | 61.5            | 71.6            |
| M   | Penis and Other Genital Organs | Lung and Bronchus                | 1592           | 53                     | 48.4                              | 0.06                                  | 31.0                   | 1.71 (1.28 to 2.23)   | 61.5            | 71.5            |
| M   | Penis and Other Genital Organs | Melanoma of the Skin             | 1592           | 6                      | 5.5                               | 0.01                                  | 11.0                   | 0.55 (0.2 to 1.19)    | 61.5            | 72.6            |
| M   | Penis and Other Genital Organs | Non-Hodgkin Lymphoma             | 1592           | 18                     | 16.5                              | 0.02                                  | 13.0                   | 1.39 (0.82 to 2.2)    | 61.5            | 71.4            |
| M   | Penis and Other Genital Organs | Oral Cavity and Pharynx          | 1592           | 8                      | 7.3                               | 0.01                                  | 5.7                    | 1.41 (0.61 to 2.77)   | 61.5            | 67.4            |
| M   | Penis and Other Genital Organs | Pancreas                         | 1592           | 6                      | 5.5                               | 0.01                                  | 6.5                    | 0.93 (0.34 to 2.02)   | 61.5            | 74.0            |
| M   | Penis and Other Genital Organs | Prostate                         | 1592           | 54                     | 49.4                              | 0.06                                  | 60.1                   | 0.9 (0.68 to 1.17)    | 61.5            | 73.2            |
| M   | Penis and Other Genital Organs | Soft Tissue including Heart      | 1592           | 11                     | 10.1                              | 0.01                                  | 1.3                    | 8.49 (4.24 to 15.19)  | 61.5            | 70.0            |
| M   | Penis and Other Genital Organs | Stomach                          | 1592           | 7                      | 6.4                               | 0.01                                  | 4.8                    | 1.45 (0.59 to 3)      | 61.5            | 80.2            |
| M   | Penis and Other Genital Organs | Urinary Bladder                  | 1592           | 24                     | 21.9                              | 0.03                                  | 17.8                   | 1.35 (0.86 to 2)      | 61.5            | 76.6            |
| M   | Prostate                       | Acute Lymphocytic Leukemia       | 390274         | 53                     | 0.2                               | 0.06                                  | 49.4                   | 1.07 (0.8 to 1.4)     | 66.4            | 74.5            |
| M   | Prostate                       | Acute Non-Lymphocytic Leukemia   | 390274         | 779                    | 2.9                               | 0.88                                  | 762.3                  | 1.02 (0.95 to 1.1)    | 66.4            | 78.5            |
| M   | Prostate                       | Anus, Anal Canal and Anorectum   | 390274         | 167                    | 0.6                               | 0.19                                  | 141.7                  | 1.18 (1.01 to 1.37)   | 66.4            | 77.4            |
| M   | Prostate                       | Bones and Joints                 | 390274         | 68                     | 0.2                               | 0.08                                  | 59.3                   | 1.15 (0.89 to 1.45)   | 66.4            | 75.4            |
| M   | Prostate                       | Brain and Other Nervous System   | 390274         | 604                    | 2.2                               | 0.68                                  | 641.1                  | 0.94 (0.87 to 1.02)   | 66.4            | 76.2            |
| M   | Prostate                       | Breast                           | 390274         | 168                    | 0.6                               | 0.19                                  | 171.8                  | 0.98 (0.84 to 1.14)   | 66.4            | 76.8            |
| M   | Prostate                       | Chronic Myeloid Leukemia         | 390274         | 258                    | 0.9                               | 0.29                                  | 285.8                  | 0.9 (0.8 to 1.02)     | 66.4            | 78.3            |
| M   | Prostate                       | Colon and Rectum                 | 390274         | 5799                   | 21.2                              | 6.54                                  | 6598.5                 | 0.88 (0.86 to 0.9)    | 66.4            | 78.0            |
| M   | Prostate                       | Esophagus                        | 390274         | 881                    | 3.2                               | 0.99                                  | 1036.5                 | 0.85 (0.8 to 0.91)    | 66.4            | 77.0            |
| M   | Prostate                       | Eye and Orbit                    | 390274         | 102                    | 0.4                               | 0.11                                  | 102.5                  | 1 (0.81 to 1.21)      | 66.4            | 76.0            |
| M   | Prostate                       | Gallbladder and Other Biliary    | 390274         | 434                    | 1.6                               | 0.49                                  | 489.4                  | 0.89 (0.81 to 0.97)   | 66.4            | 78.2            |
| M   | Prostate                       | Hodgkin Lymphoma                 | 390274         | 111                    | 0.4                               | 0.13                                  | 132.3                  | 0.84 (0.69 to 1.01)   | 66.4            | 76.3            |
| M   | Prostate                       | Kaposi Sarcoma                   | 390274         | 31                     | 0.1                               | 0.03                                  | 51.0                   | 0.61 (0.41 to 0.86)   | 66.4            | 77.3            |
| M   | Prostate                       | Kidney and Renal Pelvis          | 390274         | 2414                   | 8.8                               | 2.72                                  | 2360.7                 | 1.02 (0.98 to 1.06)   | 66.4            | 75.4            |
| M   | Prostate                       | Larynx                           | 390274         | 517                    | 1.9                               | 0.58                                  | 698.0                  | 0.74 (0.68 to 0.81)   | 66.4            | 76.8            |
| M   | Prostate                       | Liver and Intrahepatic Bile Duct | 390274         | 844                    | 3.1                               | 0.95                                  | 1378.2                 | 0.61 (0.57 to 0.66)   | 66.4            | 76.2            |
| M   | Prostate                       | Lung and Bronchus                | 390274         | 8539                   | 31.3                              | 9.63                                  | 10380.0                | 0.82 (0.81 to 0.84)   | 66.4            | 77.5            |
| M   | Prostate                       | Melanoma of the Skin             | 390274         | 3476                   | 12.7                              | 3.92                                  | 3429.4                 | 1.01 (0.98 to 1.05)   | 66.4            | 76.9            |
| M   | Prostate                       | Myeloma                          | 390274         | 1306                   | 4.8                               | 1.47                                  | 1261.6                 | 1.04 (0.98 to 1.09)   | 66.4            | 77.1            |

| Sex | First Primary Cancer (FPC)  | Subsequent Primary Cancer (SPC)  | Survivors, No. | Observed Number of SPC | Incidence per 10,000 Person-years | % Contribution to the Total Incidence | Expected Number of SPC | SIR (95% CI)          | Mean Age at FPC | Mean Age at SPC |
|-----|-----------------------------|----------------------------------|----------------|------------------------|-----------------------------------|---------------------------------------|------------------------|-----------------------|-----------------|-----------------|
| M   | Prostate                    | Non-Hodgkin Lymphoma             | 390274         | 4026                   | 14.7                              | 4.54                                  | 4119.7                 | 0.98 (0.95 to 1.01)   | 66.4            | 77.5            |
| M   | Prostate                    | Oral Cavity and Pharynx          | 390274         | 1284                   | 4.7                               | 1.45                                  | 1654.8                 | 0.78 (0.73 to 0.82)   | 66.4            | 75.5            |
| M   | Prostate                    | Pancreas                         | 390274         | 1918                   | 7.0                               | 2.16                                  | 2121.6                 | 0.9 (0.86 to 0.95)    | 66.4            | 77.2            |
| M   | Prostate                    | Penis and Other Genital Organs   | 390274         | 141                    | 0.5                               | 0.16                                  | 163.3                  | 0.86 (0.73 to 1.02)   | 66.4            | 77.6            |
| M   | Prostate                    | Small Intestine                  | 390274         | 406                    | 1.5                               | 0.46                                  | 341.7                  | 1.19 (1.08 to 1.31)   | 66.4            | 76.8            |
| M   | Prostate                    | Soft Tissue including Heart      | 390274         | 445                    | 1.6                               | 0.50                                  | 404.0                  | 1.1 (1 to 1.21)       | 66.4            | 77.7            |
| M   | Prostate                    | Stomach                          | 390274         | 1290                   | 4.7                               | 1.45                                  | 1509.4                 | 0.86 (0.81 to 0.9)    | 66.4            | 78.1            |
| M   | Prostate                    | Testis                           | 390274         | 33                     | 0.1                               | 0.04                                  | 34.3                   | 0.96 (0.66 to 1.35)   | 66.4            | 71.5            |
| M   | Prostate                    | Thyroid                          | 390274         | 472                    | 1.7                               | 0.53                                  | 397.0                  | 1.19 (1.08 to 1.3)    | 66.4            | 72.8            |
| M   | Prostate                    | Urinary Bladder                  | 390274         | 6330                   | 23.2                              | 7.14                                  | 5964.0                 | 1.06 (1.04 to 1.09)   | 66.4            | 78.6            |
| M   | Small Intestine             | Colon and Rectum                 | 2771           | 27                     | 15.8                              | 0.03                                  | 27.3                   | 0.99 (0.65 to 1.44)   | 59.0            | 66.2            |
| M   | Small Intestine             | Kidney and Renal Pelvis          | 2771           | 11                     | 6.4                               | 0.01                                  | 11.5                   | 0.96 (0.48 to 1.71)   | 59.0            | 68.3            |
| M   | Small Intestine             | Liver and Intrahepatic Bile Duct | 2771           | 12                     | 7.0                               | 0.01                                  | 7.4                    | 1.62 (0.84 to 2.83)   | 59.0            | 72.6            |
| M   | Small Intestine             | Lung and Bronchus                | 2771           | 35                     | 20.5                              | 0.04                                  | 41.5                   | 0.84 (0.59 to 1.17)   | 59.0            | 72.4            |
| M   | Small Intestine             | Melanoma of the Skin             | 2771           | 15                     | 8.8                               | 0.02                                  | 15.7                   | 0.96 (0.54 to 1.58)   | 59.0            | 71.8            |
| M   | Small Intestine             | Myeloma                          | 2771           | 5                      | 2.9                               | 0.01                                  | 5.3                    | 0.94 (0.3 to 2.18)    | 59.0            | 72.2            |
| M   | Small Intestine             | Non-Hodgkin Lymphoma             | 2771           | 25                     | 14.7                              | 0.03                                  | 17.7                   | 1.42 (0.92 to 2.09)   | 59.0            | 75.0            |
| M   | Small Intestine             | Oral Cavity and Pharynx          | 2771           | 10                     | 5.9                               | 0.01                                  | 8.7                    | 1.15 (0.55 to 2.11)   | 59.0            | 71.1            |
| M   | Small Intestine             | Pancreas                         | 2771           | 15                     | 8.8                               | 0.02                                  | 9.0                    | 1.67 (0.94 to 2.76)   | 59.0            | 68.6            |
| M   | Small Intestine             | Prostate                         | 2771           | 94                     | 55.1                              | 0.11                                  | 88.8                   | 1.06 (0.86 to 1.3)    | 59.0            | 69.5            |
| M   | Small Intestine             | Stomach                          | 2771           | 8                      | 4.7                               | 0.01                                  | 6.1                    | 1.3 (0.56 to 2.57)    | 59.0            | 70.9            |
| M   | Small Intestine             | Thyroid                          | 2771           | 5                      | 2.9                               | 0.01                                  | 2.4                    | 2.07 (0.67 to 4.83)   | 59.0            | 70.8            |
| M   | Small Intestine             | Urinary Bladder                  | 2771           | 22                     | 12.9                              | 0.02                                  | 22.9                   | 0.96 (0.6 to 1.45)    | 59.0            | 77.0            |
| M   | Soft Tissue including Heart | Acute Non-Lymphocytic Leukemia   | 5151           | 7                      | 1.8                               | 0.01                                  | 5.6                    | 1.25 (0.5 to 2.57)    | 52.9            | 68.2            |
| M   | Soft Tissue including Heart | Bones and Joints                 | 5151           | 6                      | 1.5                               | 0.01                                  | 0.6                    | 10.02 (3.68 to 21.81) | 52.9            | 55.1            |
| M   | Soft Tissue including Heart | Brain and Other Nervous System   | 5151           | 6                      | 1.5                               | 0.01                                  | 6.1                    | 0.99 (0.36 to 2.15)   | 52.9            | 65.7            |
| M   | Soft Tissue including Heart | Colon and Rectum                 | 5151           | 41                     | 10.3                              | 0.05                                  | 51.0                   | 0.8 (0.58 to 1.09)    | 52.9            | 67.4            |
| M   | Soft Tissue including Heart | Esophagus                        | 5151           | 6                      | 1.5                               | 0.01                                  | 8.3                    | 0.72 (0.27 to 1.58)   | 52.9            | 78.5            |
| M   | Soft Tissue including Heart | Kidney and Renal Pelvis          | 5151           | 28                     | 7.0                               | 0.03                                  | 21.0                   | 1.33 (0.89 to 1.93)   | 52.9            | 69.0            |
| M   | Soft Tissue including Heart | Liver and Intrahepatic Bile Duct | 5151           | 9                      | 2.3                               | 0.01                                  | 13.4                   | 0.67 (0.31 to 1.28)   | 52.9            | 65.8            |
| M   | Soft Tissue including Heart | Lung and Bronchus                | 5151           | 72                     | 18.1                              | 0.08                                  | 73.5                   | 0.98 (0.77 to 1.23)   | 52.9            | 71.9            |
| M   | Soft Tissue including Heart | Melanoma of the Skin             | 5151           | 56                     | 14.1                              | 0.06                                  | 29.6                   | 1.89 (1.43 to 2.46)   | 52.9            | 71.1            |

| Sex | First Primary Cancer (FPC)  | Subsequent Primary Cancer (SPC)  | Survivors, No. | Observed Number of SPC | Incidence per 10,000 Person-years | % Contribution to the Total Incidence | Expected Number of SPC | SIR (95% CI)        | Mean Age at FPC | Mean Age at SPC |
|-----|-----------------------------|----------------------------------|----------------|------------------------|-----------------------------------|---------------------------------------|------------------------|---------------------|-----------------|-----------------|
| M   | Soft Tissue including Heart | Myeloma                          | 5151           | 13                     | 3.3                               | 0.01                                  | 9.3                    | 1.41 (0.75 to 2.4)  | 52.9            | 77.7            |
| M   | Soft Tissue including Heart | Non-Hodgkin Lymphoma             | 5151           | 30                     | 7.5                               | 0.03                                  | 32.9                   | 0.91 (0.62 to 1.3)  | 52.9            | 71.8            |
| M   | Soft Tissue including Heart | Oral Cavity and Pharynx          | 5151           | 20                     | 5.0                               | 0.02                                  | 16.4                   | 1.22 (0.75 to 1.89) | 52.9            | 67.3            |
| M   | Soft Tissue including Heart | Pancreas                         | 5151           | 19                     | 4.8                               | 0.02                                  | 16.0                   | 1.19 (0.72 to 1.86) | 52.9            | 73.1            |
| M   | Soft Tissue including Heart | Prostate                         | 5151           | 160                    | 40.2                              | 0.18                                  | 154.9                  | 1.03 (0.88 to 1.21) | 52.9            | 70.5            |
| M   | Soft Tissue including Heart | Small Intestine                  | 5151           | 6                      | 1.5                               | 0.01                                  | 2.8                    | 2.17 (0.8 to 4.73)  | 52.9            | 67.6            |
| M   | Soft Tissue including Heart | Stomach                          | 5151           | 11                     | 2.8                               | 0.01                                  | 11.2                   | 0.98 (0.49 to 1.76) | 52.9            | 69.8            |
| M   | Soft Tissue including Heart | Thyroid                          | 5151           | 14                     | 3.5                               | 0.02                                  | 5.0                    | 2.79 (1.53 to 4.69) | 52.9            | 61.0            |
| M   | Soft Tissue including Heart | Urinary Bladder                  | 5151           | 44                     | 11.1                              | 0.05                                  | 41.7                   | 1.06 (0.77 to 1.42) | 52.9            | 74.6            |
| M   | Stomach                     | Acute Non-Lymphocytic Leukemia   | 6149           | 13                     | 3.5                               | 0.01                                  | 8.0                    | 1.63 (0.87 to 2.78) | 63.1            | 75.3            |
| M   | Stomach                     | Brain and Other Nervous System   | 6149           | 7                      | 1.9                               | 0.01                                  | 6.8                    | 1.03 (0.41 to 2.12) | 63.1            | 71.6            |
| M   | Stomach                     | Chronic Myeloid Leukemia         | 6149           | 5                      | 1.3                               | 0.01                                  | 3.0                    | 1.68 (0.55 to 3.93) | 63.1            | 71.6            |
| M   | Stomach                     | Colon and Rectum                 | 6149           | 92                     | 24.6                              | 0.10                                  | 73.0                   | 1.26 (1.02 to 1.55) | 63.1            | 73.9            |
| M   | Stomach                     | Esophagus                        | 6149           | 18                     | 4.8                               | 0.02                                  | 10.7                   | 1.68 (1 to 2.66)    | 63.1            | 72.8            |
| M   | Stomach                     | Gallbladder and Other Biliary    | 6149           | 8                      | 2.1                               | 0.01                                  | 5.9                    | 1.36 (0.59 to 2.68) | 63.1            | 73.4            |
| M   | Stomach                     | Kidney and Renal Pelvis          | 6149           | 24                     | 6.4                               | 0.03                                  | 25.7                   | 0.94 (0.6 to 1.39)  | 63.1            | 71.6            |
| M   | Stomach                     | Larynx                           | 6149           | 7                      | 1.9                               | 0.01                                  | 7.2                    | 0.97 (0.39 to 2)    | 63.1            | 69.9            |
| M   | Stomach                     | Liver and Intrahepatic Bile Duct | 6149           | 33                     | 8.8                               | 0.04                                  | 20.1                   | 1.65 (1.13 to 2.31) | 63.1            | 72.6            |
| M   | Stomach                     | Lung and Bronchus                | 6149           | 149                    | 39.9                              | 0.17                                  | 109.9                  | 1.36 (1.15 to 1.59) | 63.1            | 75.7            |
| M   | Stomach                     | Melanoma of the Skin             | 6149           | 27                     | 7.2                               | 0.03                                  | 31.1                   | 0.87 (0.57 to 1.26) | 63.1            | 72.5            |
| M   | Stomach                     | Myeloma                          | 6149           | 14                     | 3.7                               | 0.02                                  | 12.8                   | 1.1 (0.6 to 1.84)   | 63.1            | 78.4            |
| M   | Stomach                     | Non-Hodgkin Lymphoma             | 6149           | 42                     | 11.2                              | 0.05                                  | 42.4                   | 0.99 (0.71 to 1.34) | 63.1            | 74.0            |
| M   | Stomach                     | Oral Cavity and Pharynx          | 6149           | 16                     | 4.3                               | 0.02                                  | 18.9                   | 0.85 (0.49 to 1.38) | 63.1            | 70.6            |
| M   | Stomach                     | Pancreas                         | 6149           | 36                     | 9.6                               | 0.04                                  | 23.0                   | 1.56 (1.1 to 2.16)  | 63.1            | 74.4            |
| M   | Stomach                     | Prostate                         | 6149           | 187                    | 50.1                              | 0.21                                  | 202.2                  | 0.93 (0.8 to 1.07)  | 63.1            | 73.7            |
| M   | Stomach                     | Small Intestine                  | 6149           | 5                      | 1.3                               | 0.01                                  | 3.5                    | 1.41 (0.46 to 3.29) | 63.1            | 71.9            |
| M   | Stomach                     | Soft Tissue including Heart      | 6149           | 5                      | 1.3                               | 0.01                                  | 4.4                    | 1.14 (0.37 to 2.67) | 63.1            | 78.5            |
| M   | Stomach                     | Thyroid                          | 6149           | 9                      | 2.4                               | 0.01                                  | 5.1                    | 1.76 (0.81 to 3.35) | 63.1            | 65.0            |
| M   | Stomach                     | Urinary Bladder                  | 6149           | 64                     | 17.1                              | 0.07                                  | 57.4                   | 1.11 (0.86 to 1.42) | 63.1            | 75.6            |
| M   | Testis                      | Acute Non-Lymphocytic Leukemia   | 17913          | 16                     | 0.9                               | 0.02                                  | 7.5                    | 2.12 (1.21 to 3.44) | 35.8            | 60.9            |
| M   | Testis                      | Brain and Other Nervous System   | 17913          | 12                     | 0.7                               | 0.01                                  | 15.2                   | 0.79 (0.41 to 1.38) | 35.8            | 47.4            |
| M   | Testis                      | Chronic Myeloid Leukemia         | 17913          | 9                      | 0.5                               | 0.01                                  | 4.1                    | 2.22 (1.01 to 4.21) | 35.8            | 40.6            |

| Sex | First Primary Cancer (FPC) | Subsequent Primary Cancer (SPC)  | Survivors, No. | Observed Number of SPC | Incidence per 10,000 Person-years | % Contribution to the Total Incidence | Expected Number of SPC | SIR (95% CI)         | Mean Age at FPC | Mean Age at SPC |
|-----|----------------------------|----------------------------------|----------------|------------------------|-----------------------------------|---------------------------------------|------------------------|----------------------|-----------------|-----------------|
| M   | Testis                     | Colon and Rectum                 | 17913          | 101                    | 5.6                               | 0.11                                  | 78.7                   | 1.28 (1.05 to 1.56)  | 35.8            | 57.7            |
| M   | Testis                     | Esophagus                        | 17913          | 8                      | 0.4                               | 0.01                                  | 11.9                   | 0.67 (0.29 to 1.33)  | 35.8            | 56.6            |
| M   | Testis                     | Gallbladder and Other Biliary    | 17913          | 5                      | 0.3                               | 0.01                                  | 4.1                    | 1.21 (0.39 to 2.83)  | 35.8            | 57.9            |
| M   | Testis                     | Hodgkin Lymphoma                 | 17913          | 6                      | 0.3                               | 0.01                                  | 6.2                    | 0.97 (0.36 to 2.12)  | 35.8            | 43.9            |
| M   | Testis                     | Kidney and Renal Pelvis          | 17913          | 40                     | 2.2                               | 0.05                                  | 41.0                   | 0.98 (0.7 to 1.33)   | 35.8            | 55.2            |
| M   | Testis                     | Liver and Intrahepatic Bile Duct | 17913          | 15                     | 0.8                               | 0.02                                  | 24.5                   | 0.61 (0.34 to 1.01)  | 35.8            | 60.1            |
| M   | Testis                     | Lung and Bronchus                | 17913          | 79                     | 4.4                               | 0.09                                  | 74.3                   | 1.06 (0.84 to 1.33)  | 35.8            | 62.0            |
| M   | Testis                     | Melanoma of the Skin             | 17913          | 68                     | 3.8                               | 0.08                                  | 60.4                   | 1.13 (0.87 to 1.43)  | 35.8            | 54.8            |
| M   | Testis                     | Myeloma                          | 17913          | 12                     | 0.7                               | 0.01                                  | 11.8                   | 1.01 (0.52 to 1.77)  | 35.8            | 55.9            |
| M   | Testis                     | Non-Hodgkin Lymphoma             | 17913          | 50                     | 2.8                               | 0.06                                  | 53.3                   | 0.94 (0.7 to 1.24)   | 35.8            | 58.5            |
| M   | Testis                     | Oral Cavity and Pharynx          | 17913          | 18                     | 1.0                               | 0.02                                  | 37.0                   | 0.49 (0.29 to 0.77)  | 35.8            | 56.6            |
| M   | Testis                     | Pancreas                         | 17913          | 36                     | 2.0                               | 0.04                                  | 20.3                   | 1.77 (1.24 to 2.46)  | 35.8            | 59.5            |
| M   | Testis                     | Prostate                         | 17913          | 170                    | 9.5                               | 0.19                                  | 207.7                  | 0.82 (0.7 to 0.95)   | 35.8            | 59.6            |
| M   | Testis                     | Small Intestine                  | 17913          | 8                      | 0.4                               | 0.01                                  | 4.7                    | 1.72 (0.74 to 3.39)  | 35.8            | 57.9            |
| M   | Testis                     | Soft Tissue including Heart      | 17913          | 16                     | 0.9                               | 0.02                                  | 7.3                    | 2.19 (1.25 to 3.55)  | 35.8            | 50.2            |
| M   | Testis                     | Stomach                          | 17913          | 21                     | 1.2                               | 0.02                                  | 14.9                   | 1.41 (0.87 to 2.16)  | 35.8            | 59.9            |
| M   | Testis                     | Thyroid                          | 17913          | 31                     | 1.7                               | 0.03                                  | 18.5                   | 1.68 (1.14 to 2.38)  | 35.8            | 45.3            |
| M   | Testis                     | Urinary Bladder                  | 17913          | 69                     | 3.8                               | 0.08                                  | 42.2                   | 1.64 (1.27 to 2.07)  | 35.8            | 59.0            |
| M   | Thyroid                    | Acute Lymphocytic Leukemia       | 12442          | 9                      | 0.9                               | 0.01                                  | 1.3                    | 7.12 (3.26 to 13.52) | 49.8            | 60.5            |
| M   | Thyroid                    | Acute Non-Lymphocytic Leukemia   | 12442          | 16                     | 1.6                               | 0.02                                  | 11.1                   | 1.44 (0.82 to 2.33)  | 49.8            | 68.5            |
| M   | Thyroid                    | Brain and Other Nervous System   | 12442          | 14                     | 1.4                               | 0.02                                  | 13.9                   | 1.01 (0.55 to 1.7)   | 49.8            | 60.7            |
| M   | Thyroid                    | Chronic Myeloid Leukemia         | 12442          | 7                      | 0.7                               | 0.01                                  | 4.6                    | 1.52 (0.61 to 3.14)  | 49.8            | 66.7            |
| M   | Thyroid                    | Colon and Rectum                 | 12442          | 97                     | 9.8                               | 0.11                                  | 103.2                  | 0.94 (0.76 to 1.15)  | 49.8            | 69.0            |
| M   | Thyroid                    | Esophagus                        | 12442          | 21                     | 2.1                               | 0.02                                  | 17.5                   | 1.2 (0.74 to 1.83)   | 49.8            | 69.6            |
| M   | Thyroid                    | Gallbladder and Other Biliary    | 12442          | 14                     | 1.4                               | 0.02                                  | 7.1                    | 1.97 (1.08 to 3.3)   | 49.8            | 72.8            |
| M   | Thyroid                    | Kidney and Renal Pelvis          | 12442          | 102                    | 10.3                              | 0.11                                  | 46.9                   | 2.18 (1.77 to 2.64)  | 49.8            | 64.6            |
| M   | Thyroid                    | Larynx                           | 12442          | 7                      | 0.7                               | 0.01                                  | 12.0                   | 0.58 (0.23 to 1.2)   | 49.8            | 71.3            |
| M   | Thyroid                    | Liver and Intrahepatic Bile Duct | 12442          | 14                     | 1.4                               | 0.02                                  | 31.2                   | 0.45 (0.25 to 0.75)  | 49.8            | 69.3            |
| M   | Thyroid                    | Lung and Bronchus                | 12442          | 113                    | 11.5                              | 0.13                                  | 143.2                  | 0.79 (0.65 to 0.95)  | 49.8            | 69.4            |
| M   | Thyroid                    | Melanoma of the Skin             | 12442          | 86                     | 8.7                               | 0.10                                  | 65.8                   | 1.31 (1.05 to 1.62)  | 49.8            | 67.2            |
| M   | Thyroid                    | Myeloma                          | 12442          | 22                     | 2.2                               | 0.02                                  | 18.5                   | 1.19 (0.75 to 1.8)   | 49.8            | 72.9            |
| M   | Thyroid                    | Non-Hodgkin Lymphoma             | 12442          | 92                     | 9.3                               | 0.10                                  | 68.6                   | 1.34 (1.08 to 1.65)  | 49.8            | 66.4            |

| Sex | First Primary Cancer (FPC) | Subsequent Primary Cancer (SPC)  | Survivors, No. | Observed Number of SPC | Incidence per 10,000 Person-years | % Contribution to the Total Incidence | Expected Number of SPC | SIR (95% CI)        | Mean Age at FPC | Mean Age at SPC |
|-----|----------------------------|----------------------------------|----------------|------------------------|-----------------------------------|---------------------------------------|------------------------|---------------------|-----------------|-----------------|
| M   | Thyroid                    | Oral Cavity and Pharynx          | 12442          | 29                     | 2.9                               | 0.03                                  | 38.3                   | 0.76 (0.51 to 1.09) | 49.8            | 61.4            |
| M   | Thyroid                    | Pancreas                         | 12442          | 37                     | 3.8                               | 0.04                                  | 32.6                   | 1.14 (0.8 to 1.57)  | 49.8            | 67.8            |
| M   | Thyroid                    | Penis and Other Genital Organs   | 12442          | 5                      | 0.5                               | 0.01                                  | 2.5                    | 2 (0.65 to 4.68)    | 49.8            | 69.4            |
| M   | Thyroid                    | Prostate                         | 12442          | 385                    | 39.0                              | 0.43                                  | 329.6                  | 1.17 (1.05 to 1.29) | 49.8            | 66.6            |
| M   | Thyroid                    | Small Intestine                  | 12442          | 12                     | 1.2                               | 0.01                                  | 5.8                    | 2.06 (1.06 to 3.59) | 49.8            | 71.3            |
| M   | Thyroid                    | Soft Tissue including Heart      | 12442          | 19                     | 1.9                               | 0.02                                  | 7.4                    | 2.57 (1.55 to 4.02) | 49.8            | 64.9            |
| M   | Thyroid                    | Stomach                          | 12442          | 25                     | 2.5                               | 0.03                                  | 22.6                   | 1.11 (0.72 to 1.63) | 49.8            | 67.8            |
| M   | Thyroid                    | Urinary Bladder                  | 12442          | 83                     | 8.4                               | 0.09                                  | 79.9                   | 1.04 (0.83 to 1.29) | 49.8            | 73.4            |
| M   | Urinary Bladder            | Acute Lymphocytic Leukemia       | 51513          | 11                     | 0.3                               | 0.01                                  | 6.2                    | 1.79 (0.89 to 3.2)  | 65.6            | 69.7            |
| M   | Urinary Bladder            | Acute Non-Lymphocytic Leukemia   | 51513          | 101                    | 2.9                               | 0.11                                  | 89.5                   | 1.13 (0.92 to 1.37) | 65.6            | 77.5            |
| M   | Urinary Bladder            | Anus, Anal Canal and Anorectum   | 51513          | 16                     | 0.5                               | 0.02                                  | 17.4                   | 0.92 (0.53 to 1.5)  | 65.6            | 72.4            |
| M   | Urinary Bladder            | Bones and Joints                 | 51513          | 8                      | 0.2                               | 0.01                                  | 7.3                    | 1.1 (0.47 to 2.16)  | 65.6            | 76.5            |
| M   | Urinary Bladder            | Brain and Other Nervous System   | 51513          | 81                     | 2.3                               | 0.09                                  | 79.7                   | 1.02 (0.81 to 1.26) | 65.6            | 73.9            |
| M   | Urinary Bladder            | Breast                           | 51513          | 20                     | 0.6                               | 0.02                                  | 19.4                   | 1.03 (0.63 to 1.59) | 65.6            | 72.0            |
| M   | Urinary Bladder            | Chronic Myeloid Leukemia         | 51513          | 32                     | 0.9                               | 0.04                                  | 33.8                   | 0.95 (0.65 to 1.34) | 65.6            | 76.7            |
| M   | Urinary Bladder            | Colon and Rectum                 | 51513          | 688                    | 19.7                              | 0.78                                  | 762.0                  | 0.9 (0.84 to 0.97)  | 65.6            | 76.6            |
| M   | Urinary Bladder            | Esophagus                        | 51513          | 142                    | 4.1                               | 0.16                                  | 122.7                  | 1.16 (0.98 to 1.36) | 65.6            | 75.2            |
| M   | Urinary Bladder            | Eye and Orbit                    | 51513          | 11                     | 0.3                               | 0.01                                  | 13.2                   | 0.84 (0.42 to 1.5)  | 65.6            | 76.0            |
| M   | Urinary Bladder            | Gallbladder and Other Biliary    | 51513          | 48                     | 1.4                               | 0.05                                  | 55.9                   | 0.86 (0.63 to 1.14) | 65.6            | 78.3            |
| M   | Urinary Bladder            | Hodgkin Lymphoma                 | 51513          | 13                     | 0.4                               | 0.01                                  | 16.7                   | 0.78 (0.41 to 1.33) | 65.6            | 70.0            |
| M   | Urinary Bladder            | Kidney and Renal Pelvis          | 51513          | 487                    | 13.9                              | 0.55                                  | 275.6                  | 1.77 (1.61 to 1.93) | 65.6            | 73.7            |
| M   | Urinary Bladder            | Larynx                           | 51513          | 111                    | 3.2                               | 0.13                                  | 78.7                   | 1.41 (1.16 to 1.7)  | 65.6            | 73.7            |
| M   | Urinary Bladder            | Liver and Intrahepatic Bile Duct | 51513          | 187                    | 5.3                               | 0.21                                  | 157.0                  | 1.19 (1.03 to 1.38) | 65.6            | 74.7            |
| M   | Urinary Bladder            | Lung and Bronchus                | 51513          | 2078                   | 59.4                              | 2.34                                  | 1166.1                 | 1.78 (1.71 to 1.86) | 65.6            | 76.4            |
| M   | Urinary Bladder            | Melanoma of the Skin             | 51513          | 306                    | 8.8                               | 0.34                                  | 442.7                  | 0.69 (0.62 to 0.77) | 65.6            | 76.4            |
| M   | Urinary Bladder            | Myeloma                          | 51513          | 121                    | 3.5                               | 0.14                                  | 135.3                  | 0.89 (0.74 to 1.07) | 65.6            | 77.8            |
| M   | Urinary Bladder            | Non-Hodgkin Lymphoma             | 51513          | 449                    | 12.8                              | 0.51                                  | 498.4                  | 0.9 (0.82 to 0.99)  | 65.6            | 76.8            |
| M   | Urinary Bladder            | Oral Cavity and Pharynx          | 51513          | 187                    | 5.3                               | 0.21                                  | 202.8                  | 0.92 (0.8 to 1.06)  | 65.6            | 74.3            |
| M   | Urinary Bladder            | Pancreas                         | 51513          | 210                    | 6.0                               | 0.24                                  | 242.3                  | 0.87 (0.75 to 0.99) | 65.6            | 77.3            |
| M   | Urinary Bladder            | Penis and Other Genital Organs   | 51513          | 20                     | 0.6                               | 0.02                                  | 18.9                   | 1.06 (0.65 to 1.63) | 65.6            | 75.4            |
| M   | Urinary Bladder            | Prostate                         | 51513          | 1818                   | 52.0                              | 2.05                                  | 2154.9                 | 0.84 (0.81 to 0.88) | 65.6            | 74.2            |
| M   | Urinary Bladder            | Small Intestine                  | 51513          | 48                     | 1.4                               | 0.05                                  | 37.9                   | 1.27 (0.93 to 1.68) | 65.6            | 76.3            |



| Sex | First Primary Cancer (FPC)     | Subsequent Primary Cancer (SPC)  | Survivors, No. | Observed Number of SPC | Incidence per 10,000 Person-years | % Contribution to the Total Incidence | Expected Number of SPC | SIR (95% CI)         | Mean Age at FPC | Mean Age at SPC |
|-----|--------------------------------|----------------------------------|----------------|------------------------|-----------------------------------|---------------------------------------|------------------------|----------------------|-----------------|-----------------|
| M   | Urinary Bladder                | Soft Tissue including Heart      | 51513          | 44                     | 1.3                               | 0.05                                  | 48.9                   | 0.9 (0.65 to 1.21)   | 65.6            | 73.8            |
| M   | Urinary Bladder                | Stomach                          | 51513          | 168                    | 4.8                               | 0.19                                  | 166.1                  | 1.01 (0.86 to 1.18)  | 65.6            | 76.7            |
| M   | Urinary Bladder                | Testis                           | 51513          | 8                      | 0.2                               | 0.01                                  | 6.3                    | 1.28 (0.55 to 2.52)  | 65.6            | 70.5            |
| M   | Urinary Bladder                | Thyroid                          | 51513          | 64                     | 1.8                               | 0.07                                  | 50.4                   | 1.27 (0.98 to 1.62)  | 65.6            | 70.6            |
| W   | Acute Lymphocytic Leukemia     | Breast                           | 486            | 8                      | 22.4                              | 0.01                                  | 7.1                    | 1.13 (0.49 to 2.23)  | 41.3            | 65.0            |
| W   | Acute Lymphocytic Leukemia     | Lung and Bronchus                | 486            | 6                      | 16.8                              | 0.01                                  | 2.1                    | 2.85 (1.05 to 6.21)  | 41.3            | 67.8            |
| W   | Acute Non-Lymphocytic Leukemia | Breast                           | 1861           | 46                     | 31.4                              | 0.08                                  | 37.8                   | 1.22 (0.89 to 1.62)  | 46.9            | 60.0            |
| W   | Acute Non-Lymphocytic Leukemia | Colon and Rectum                 | 1861           | 7                      | 4.8                               | 0.01                                  | 10.0                   | 0.7 (0.28 to 1.44)   | 46.9            | 76.3            |
| W   | Acute Non-Lymphocytic Leukemia | Corpus and Uterus, NOS           | 1861           | 8                      | 5.5                               | 0.01                                  | 8.5                    | 0.95 (0.41 to 1.86)  | 46.9            | 67.0            |
| W   | Acute Non-Lymphocytic Leukemia | Lung and Bronchus                | 1861           | 14                     | 9.6                               | 0.02                                  | 13.9                   | 1.01 (0.55 to 1.69)  | 46.9            | 67.7            |
| W   | Acute Non-Lymphocytic Leukemia | Melanoma of the Skin             | 1861           | 5                      | 3.4                               | 0.01                                  | 4.7                    | 1.07 (0.35 to 2.49)  | 46.9            | 78.3            |
| W   | Acute Non-Lymphocytic Leukemia | Non-Hodgkin Lymphoma             | 1861           | 7                      | 4.8                               | 0.01                                  | 5.7                    | 1.23 (0.49 to 2.52)  | 46.9            | 65.9            |
| W   | Acute Non-Lymphocytic Leukemia | Thyroid                          | 1861           | 7                      | 4.8                               | 0.01                                  | 4.4                    | 1.59 (0.64 to 3.27)  | 46.9            | 61.3            |
| W   | Acute Non-Lymphocytic Leukemia | Urinary Bladder                  | 1861           | 6                      | 4.1                               | 0.01                                  | 2.4                    | 2.46 (0.9 to 5.35)   | 46.9            | 73.9            |
| W   | Anus, Anal Canal and Anorectum | Acute Non-Lymphocytic Leukemia   | 3042           | 6                      | 2.9                               | 0.01                                  | 2.4                    | 2.51 (0.92 to 5.46)  | 59.8            | 66.3            |
| W   | Anus, Anal Canal and Anorectum | Breast                           | 3042           | 77                     | 37.2                              | 0.13                                  | 76.8                   | 1 (0.79 to 1.25)     | 59.8            | 68.1            |
| W   | Anus, Anal Canal and Anorectum | Colon and Rectum                 | 3042           | 38                     | 18.4                              | 0.06                                  | 26.9                   | 1.41 (1 to 1.94)     | 59.8            | 73.9            |
| W   | Anus, Anal Canal and Anorectum | Corpus and Uterus, NOS           | 3042           | 39                     | 18.8                              | 0.07                                  | 17.6                   | 2.21 (1.57 to 3.03)  | 59.8            | 68.7            |
| W   | Anus, Anal Canal and Anorectum | Lung and Bronchus                | 3042           | 80                     | 38.6                              | 0.14                                  | 37.9                   | 2.11 (1.67 to 2.63)  | 59.8            | 70.3            |
| W   | Anus, Anal Canal and Anorectum | Melanoma of the Skin             | 3042           | 13                     | 6.3                               | 0.02                                  | 9.4                    | 1.39 (0.74 to 2.37)  | 59.8            | 71.2            |
| W   | Anus, Anal Canal and Anorectum | Non-Hodgkin Lymphoma             | 3042           | 13                     | 6.3                               | 0.02                                  | 14.8                   | 0.88 (0.47 to 1.51)  | 59.8            | 71.6            |
| W   | Anus, Anal Canal and Anorectum | Oral Cavity and Pharynx          | 3042           | 9                      | 4.3                               | 0.02                                  | 4.2                    | 2.17 (0.99 to 4.12)  | 59.8            | 64.8            |
| W   | Anus, Anal Canal and Anorectum | Pancreas                         | 3042           | 10                     | 4.8                               | 0.02                                  | 9.0                    | 1.11 (0.53 to 2.04)  | 59.8            | 73.3            |
| W   | Anus, Anal Canal and Anorectum | Urinary Bladder                  | 3042           | 14                     | 6.8                               | 0.02                                  | 7.2                    | 1.94 (1.06 to 3.25)  | 59.8            | 65.8            |
| W   | Anus, Anal Canal and Anorectum | Vulva and Other Genital Organs   | 3042           | 24                     | 11.6                              | 0.04                                  | 3.2                    | 7.55 (4.84 to 11.24) | 59.8            | 65.5            |
| W   | Bones and Joints               | Breast                           | 1252           | 19                     | 17.3                              | 0.03                                  | 27.9                   | 0.68 (0.41 to 1.06)  | 45.6            | 64.4            |
| W   | Bones and Joints               | Liver and Intrahepatic Bile Duct | 1252           | 5                      | 4.6                               | 0.01                                  | 0.9                    | 5.36 (1.74 to 12.52) | 45.6            | 53.9            |
| W   | Bones and Joints               | Lung and Bronchus                | 1252           | 13                     | 11.8                              | 0.02                                  | 10.3                   | 1.27 (0.67 to 2.16)  | 45.6            | 66.3            |
| W   | Bones and Joints               | Melanoma of the Skin             | 1252           | 5                      | 4.6                               | 0.01                                  | 3.7                    | 1.35 (0.44 to 3.14)  | 45.6            | 59.8            |
| W   | Bones and Joints               | Non-Hodgkin Lymphoma             | 1252           | 5                      | 4.6                               | 0.01                                  | 4.3                    | 1.15 (0.37 to 2.69)  | 45.6            | 68.8            |
| W   | Brain and Other Nervous System | Breast                           | 4123           | 62                     | 20.0                              | 0.11                                  | 69.3                   | 0.89 (0.69 to 1.15)  | 42.8            | 58.5            |
| W   | Brain and Other Nervous System | Colon and Rectum                 | 4123           | 13                     | 4.2                               | 0.02                                  | 16.7                   | 0.78 (0.42 to 1.33)  | 42.8            | 64.4            |

| Sex | First Primary Cancer (FPC)     | Subsequent Primary Cancer (SPC)  | Survivors, No. | Observed Number of SPC | Incidence per 10,000 Person-years | % Contribution to the Total Incidence | Expected Number of SPC | SIR (95% CI)         | Mean Age at FPC | Mean Age at SPC |
|-----|--------------------------------|----------------------------------|----------------|------------------------|-----------------------------------|---------------------------------------|------------------------|----------------------|-----------------|-----------------|
| W   | Brain and Other Nervous System | Corpus and Uterus, NOS           | 4123           | 12                     | 3.9                               | 0.02                                  | 14.9                   | 0.8 (0.42 to 1.4)    | 42.8            | 55.9            |
| W   | Brain and Other Nervous System | Kidney and Renal Pelvis          | 4123           | 6                      | 1.9                               | 0.01                                  | 5.0                    | 1.2 (0.44 to 2.61)   | 42.8            | 60.8            |
| W   | Brain and Other Nervous System | Lung and Bronchus                | 4123           | 18                     | 5.8                               | 0.03                                  | 21.4                   | 0.84 (0.5 to 1.33)   | 42.8            | 62.5            |
| W   | Brain and Other Nervous System | Melanoma of the Skin             | 4123           | 13                     | 4.2                               | 0.02                                  | 9.4                    | 1.38 (0.73 to 2.36)  | 42.8            | 61.7            |
| W   | Brain and Other Nervous System | Non-Hodgkin Lymphoma             | 4123           | 9                      | 2.9                               | 0.02                                  | 9.5                    | 0.95 (0.44 to 1.81)  | 42.8            | 67.0            |
| W   | Brain and Other Nervous System | Pancreas                         | 4123           | 7                      | 2.3                               | 0.01                                  | 4.9                    | 1.44 (0.58 to 2.96)  | 42.8            | 75.2            |
| W   | Brain and Other Nervous System | Soft Tissue including Heart      | 4123           | 7                      | 2.3                               | 0.01                                  | 1.2                    | 5.79 (2.33 to 11.93) | 42.8            | 56.3            |
| W   | Brain and Other Nervous System | Thyroid                          | 4123           | 14                     | 4.5                               | 0.02                                  | 9.4                    | 1.49 (0.81 to 2.49)  | 42.8            | 52.3            |
| W   | Breast                         | Acute Lymphocytic Leukemia       | 334273         | 57                     | 0.2                               | 0.10                                  | 30.9                   | 1.85 (1.4 to 2.39)   | 58.8            | 69.0            |
| W   | Breast                         | Acute Non-Lymphocytic Leukemia   | 334273         | 455                    | 1.7                               | 0.77                                  | 301.9                  | 1.51 (1.37 to 1.65)  | 58.8            | 71.9            |
| W   | Breast                         | Anus, Anal Canal and Anorectum   | 334273         | 156                    | 0.6                               | 0.26                                  | 158.0                  | 0.99 (0.84 to 1.16)  | 58.8            | 68.2            |
| W   | Breast                         | Bones and Joints                 | 334273         | 33                     | 0.1                               | 0.06                                  | 29.9                   | 1.11 (0.76 to 1.55)  | 58.8            | 66.3            |
| W   | Breast                         | Brain and Other Nervous System   | 334273         | 258                    | 1.0                               | 0.44                                  | 327.9                  | 0.79 (0.69 to 0.89)  | 58.8            | 70.9            |
| W   | Breast                         | Cervix Uteri                     | 334273         | 150                    | 0.6                               | 0.25                                  | 293.5                  | 0.51 (0.43 to 0.6)   | 58.8            | 67.4            |
| W   | Breast                         | Chronic Myeloid Leukemia         | 334273         | 119                    | 0.5                               | 0.20                                  | 106.9                  | 1.11 (0.92 to 1.33)  | 58.8            | 72.1            |
| W   | Breast                         | Colon and Rectum                 | 334273         | 3241                   | 12.3                              | 5.49                                  | 3401.6                 | 0.95 (0.92 to 0.99)  | 58.8            | 74.8            |
| W   | Breast                         | Corpus and Uterus, NOS           | 334273         | 2782                   | 10.5                              | 4.71                                  | 2153.8                 | 1.29 (1.24 to 1.34)  | 58.8            | 69.9            |
| W   | Breast                         | Esophagus                        | 334273         | 194                    | 0.7                               | 0.33                                  | 181.8                  | 1.07 (0.92 to 1.23)  | 58.8            | 74.2            |
| W   | Breast                         | Eye and Orbit                    | 334273         | 47                     | 0.2                               | 0.08                                  | 52.8                   | 0.89 (0.66 to 1.19)  | 58.8            | 69.5            |
| W   | Breast                         | Gallbladder and Other Biliary    | 334273         | 268                    | 1.0                               | 0.45                                  | 304.7                  | 0.88 (0.78 to 0.99)  | 58.8            | 75.2            |
| W   | Breast                         | Hodgkin Lymphoma                 | 334273         | 51                     | 0.2                               | 0.09                                  | 69.6                   | 0.73 (0.55 to 0.96)  | 58.8            | 70.5            |
| W   | Breast                         | Kaposi Sarcoma                   | 334273         | 7                      | 0.0                               | 0.01                                  | 8.5                    | 0.82 (0.33 to 1.69)  | 58.8            | 77.4            |
| W   | Breast                         | Kidney and Renal Pelvis          | 334273         | 813                    | 3.1                               | 1.38                                  | 838.9                  | 0.97 (0.9 to 1.04)   | 58.8            | 72.0            |
| W   | Breast                         | Larynx                           | 334273         | 81                     | 0.3                               | 0.14                                  | 88.8                   | 0.91 (0.72 to 1.13)  | 58.8            | 71.0            |
| W   | Breast                         | Liver and Intrahepatic Bile Duct | 334273         | 373                    | 1.4                               | 0.63                                  | 425.0                  | 0.88 (0.79 to 0.97)  | 58.8            | 73.5            |
| W   | Breast                         | Lung and Bronchus                | 334273         | 5409                   | 20.5                              | 9.16                                  | 4811.9                 | 1.12 (1.09 to 1.15)  | 58.8            | 73.1            |
| W   | Breast                         | Melanoma of the Skin             | 334273         | 1167                   | 4.4                               | 1.98                                  | 1126.3                 | 1.04 (0.98 to 1.1)   | 58.8            | 69.7            |
| W   | Breast                         | Myeloma                          | 334273         | 406                    | 1.5                               | 0.69                                  | 497.9                  | 0.82 (0.74 to 0.9)   | 58.8            | 73.1            |
| W   | Breast                         | Non-Hodgkin Lymphoma             | 334273         | 1710                   | 6.5                               | 2.90                                  | 1850.0                 | 0.92 (0.88 to 0.97)  | 58.8            | 73.7            |
| W   | Breast                         | Oral Cavity and Pharynx          | 334273         | 702                    | 2.7                               | 1.19                                  | 519.9                  | 1.35 (1.25 to 1.45)  | 58.8            | 69.6            |
| W   | Breast                         | Ovary                            | 334273         | 1097                   | 4.2                               | 1.86                                  | 958.4                  | 1.15 (1.08 to 1.21)  | 58.8            | 68.2            |
| W   | Breast                         | Pancreas                         | 334273         | 1240                   | 4.7                               | 2.10                                  | 1134.3                 | 1.09 (1.03 to 1.16)  | 58.8            | 74.4            |

| Sex | First Primary Cancer (FPC) | Subsequent Primary Cancer (SPC)  | Survivors, No. | Observed Number of SPC | Incidence per 10,000 Person-years | % Contribution to the Total Incidence | Expected Number of SPC | SIR (95% CI)        | Mean Age at FPC | Mean Age at SPC |
|-----|----------------------------|----------------------------------|----------------|------------------------|-----------------------------------|---------------------------------------|------------------------|---------------------|-----------------|-----------------|
| W   | Breast                     | Small Intestine                  | 334273         | 201                    | 0.8                               | 0.34                                  | 163.1                  | 1.23 (1.07 to 1.42) | 58.8            | 70.1            |
| W   | Breast                     | Soft Tissue including Heart      | 334273         | 322                    | 1.2                               | 0.55                                  | 178.4                  | 1.81 (1.61 to 2.01) | 58.8            | 68.5            |
| W   | Breast                     | Stomach                          | 334273         | 507                    | 1.9                               | 0.86                                  | 488.7                  | 1.04 (0.95 to 1.13) | 58.8            | 72.9            |
| W   | Breast                     | Thyroid                          | 334273         | 811                    | 3.1                               | 1.37                                  | 723.5                  | 1.12 (1.05 to 1.2)  | 58.8            | 64.8            |
| W   | Breast                     | Urinary Bladder                  | 334273         | 982                    | 3.7                               | 1.66                                  | 904.6                  | 1.09 (1.02 to 1.16) | 58.8            | 74.2            |
| W   | Breast                     | Vulva and Other Genital Organs   | 334273         | 413                    | 1.6                               | 0.70                                  | 389.5                  | 1.06 (0.96 to 1.17) | 58.8            | 71.5            |
| W   | Cervix Uteri               | Acute Non-Lymphocytic Leukemia   | 20153          | 12                     | 0.6                               | 0.02                                  | 11.6                   | 1.04 (0.54 to 1.81) | 46.4            | 62.3            |
| W   | Cervix Uteri               | Anus, Anal Canal and Anorectum   | 20153          | 14                     | 0.7                               | 0.02                                  | 7.6                    | 1.83 (1 to 3.08)    | 46.4            | 61.7            |
| W   | Cervix Uteri               | Brain and Other Nervous System   | 20153          | 14                     | 0.7                               | 0.02                                  | 15.1                   | 0.93 (0.51 to 1.56) | 46.4            | 61.1            |
| W   | Cervix Uteri               | Breast                           | 20153          | 380                    | 20.0                              | 0.64                                  | 493.4                  | 0.77 (0.7 to 0.85)  | 46.4            | 60.0            |
| W   | Cervix Uteri               | Chronic Myeloid Leukemia         | 20153          | 5                      | 0.3                               | 0.01                                  | 4.4                    | 1.14 (0.37 to 2.66) | 46.4            | 62.2            |
| W   | Cervix Uteri               | Colon and Rectum                 | 20153          | 176                    | 9.3                               | 0.30                                  | 132.2                  | 1.33 (1.14 to 1.54) | 46.4            | 65.7            |
| W   | Cervix Uteri               | Corpus and Uterus, NOS           | 20153          | 57                     | 3.0                               | 0.10                                  | 107.5                  | 0.53 (0.4 to 0.69)  | 46.4            | 63.1            |
| W   | Cervix Uteri               | Gallbladder and Other Biliary    | 20153          | 17                     | 0.9                               | 0.03                                  | 11.1                   | 1.53 (0.89 to 2.46) | 46.4            | 68.2            |
| W   | Cervix Uteri               | Hodgkin Lymphoma                 | 20153          | 8                      | 0.4                               | 0.01                                  | 4.3                    | 1.87 (0.81 to 3.69) | 46.4            | 55.6            |
| W   | Cervix Uteri               | Kidney and Renal Pelvis          | 20153          | 39                     | 2.1                               | 0.07                                  | 36.7                   | 1.06 (0.76 to 1.45) | 46.4            | 62.3            |
| W   | Cervix Uteri               | Larynx                           | 20153          | 8                      | 0.4                               | 0.01                                  | 4.0                    | 1.99 (0.86 to 3.91) | 46.4            | 60.3            |
| W   | Cervix Uteri               | Liver and Intrahepatic Bile Duct | 20153          | 21                     | 1.1                               | 0.04                                  | 18.3                   | 1.15 (0.71 to 1.76) | 46.4            | 71.4            |
| W   | Cervix Uteri               | Lung and Bronchus                | 20153          | 322                    | 17.0                              | 0.55                                  | 169.1                  | 1.9 (1.7 to 2.12)   | 46.4            | 66.7            |
| W   | Cervix Uteri               | Melanoma of the Skin             | 20153          | 33                     | 1.7                               | 0.06                                  | 57.2                   | 0.58 (0.4 to 0.81)  | 46.4            | 60.2            |
| W   | Cervix Uteri               | Myeloma                          | 20153          | 21                     | 1.1                               | 0.04                                  | 19.8                   | 1.06 (0.66 to 1.62) | 46.4            | 66.0            |
| W   | Cervix Uteri               | Non-Hodgkin Lymphoma             | 20153          | 71                     | 3.7                               | 0.12                                  | 69.7                   | 1.02 (0.8 to 1.29)  | 46.4            | 66.0            |
| W   | Cervix Uteri               | Oral Cavity and Pharynx          | 20153          | 30                     | 1.6                               | 0.05                                  | 22.7                   | 1.32 (0.89 to 1.89) | 46.4            | 65.6            |
| W   | Cervix Uteri               | Ovary                            | 20153          | 32                     | 1.7                               | 0.05                                  | 45.2                   | 0.71 (0.48 to 1)    | 46.4            | 60.8            |
| W   | Cervix Uteri               | Pancreas                         | 20153          | 35                     | 1.8                               | 0.06                                  | 39.8                   | 0.88 (0.61 to 1.22) | 46.4            | 66.8            |
| W   | Cervix Uteri               | Small Intestine                  | 20153          | 9                      | 0.5                               | 0.02                                  | 7.1                    | 1.27 (0.58 to 2.41) | 46.4            | 70.3            |
| W   | Cervix Uteri               | Soft Tissue including Heart      | 20153          | 20                     | 1.1                               | 0.03                                  | 8.5                    | 2.35 (1.44 to 3.63) | 46.4            | 63.6            |
| W   | Cervix Uteri               | Stomach                          | 20153          | 32                     | 1.7                               | 0.05                                  | 20.7                   | 1.55 (1.06 to 2.18) | 46.4            | 69.0            |
| W   | Cervix Uteri               | Thyroid                          | 20153          | 51                     | 2.7                               | 0.09                                  | 56.8                   | 0.9 (0.67 to 1.18)  | 46.4            | 55.7            |
| W   | Cervix Uteri               | Urinary Bladder                  | 20153          | 43                     | 2.3                               | 0.07                                  | 29.2                   | 1.48 (1.07 to 1.99) | 46.4            | 67.5            |
| W   | Cervix Uteri               | Vulva and Other Genital Organs   | 20153          | 85                     | 4.5                               | 0.14                                  | 15.7                   | 5.43 (4.34 to 6.71) | 46.4            | 64.1            |
| W   | Chronic Myeloid Leukemia   | Breast                           | 1969           | 25                     | 19.8                              | 0.04                                  | 37.3                   | 0.67 (0.43 to 0.99) | 53.4            | 67.6            |

| Sex | First Primary Cancer (FPC) | Subsequent Primary Cancer (SPC)  | Survivors, No. | Observed Number of SPC | Incidence per 10,000 Person-years | % Contribution to the Total Incidence | Expected Number of SPC | SIR (95% CI)        | Mean Age at FPC | Mean Age at SPC |
|-----|----------------------------|----------------------------------|----------------|------------------------|-----------------------------------|---------------------------------------|------------------------|---------------------|-----------------|-----------------|
| W   | Chronic Myeloid Leukemia   | Colon and Rectum                 | 1969           | 15                     | 11.9                              | 0.03                                  | 11.1                   | 1.36 (0.76 to 2.24) | 53.4            | 70.9            |
| W   | Chronic Myeloid Leukemia   | Corpus and Uterus, NOS           | 1969           | 8                      | 6.3                               | 0.01                                  | 8.4                    | 0.96 (0.41 to 1.88) | 53.4            | 61.3            |
| W   | Chronic Myeloid Leukemia   | Lung and Bronchus                | 1969           | 12                     | 9.5                               | 0.02                                  | 15.6                   | 0.77 (0.4 to 1.34)  | 53.4            | 71.3            |
| W   | Chronic Myeloid Leukemia   | Melanoma of the Skin             | 1969           | 7                      | 5.5                               | 0.01                                  | 4.6                    | 1.52 (0.61 to 3.14) | 53.4            | 66.3            |
| W   | Chronic Myeloid Leukemia   | Non-Hodgkin Lymphoma             | 1969           | 8                      | 6.3                               | 0.01                                  | 6.3                    | 1.28 (0.55 to 2.52) | 53.4            | 73.9            |
| W   | Chronic Myeloid Leukemia   | Oral Cavity and Pharynx          | 1969           | 10                     | 7.9                               | 0.02                                  | 1.9                    | 5.34 (2.56 to 9.82) | 53.4            | 65.4            |
| W   | Colon and Rectum           | Acute Lymphocytic Leukemia       | 68770          | 5                      | 0.1                               | 0.01                                  | 5.8                    | 0.86 (0.28 to 2.02) | 65.1            | 72.2            |
| W   | Colon and Rectum           | Acute Non-Lymphocytic Leukemia   | 68770          | 60                     | 1.3                               | 0.10                                  | 68.0                   | 0.88 (0.67 to 1.14) | 65.1            | 77.2            |
| W   | Colon and Rectum           | Bones and Joints                 | 68770          | 12                     | 0.3                               | 0.02                                  | 5.9                    | 2.04 (1.05 to 3.56) | 65.1            | 70.9            |
| W   | Colon and Rectum           | Brain and Other Nervous System   | 68770          | 61                     | 1.3                               | 0.10                                  | 64.9                   | 0.94 (0.72 to 1.21) | 65.1            | 76.8            |
| W   | Colon and Rectum           | Breast                           | 68770          | 1768                   | 37.6                              | 2.99                                  | 1801.4                 | 0.98 (0.94 to 1.03) | 65.1            | 74.1            |
| W   | Colon and Rectum           | Cervix Uteri                     | 68770          | 49                     | 1.0                               | 0.08                                  | 51.9                   | 0.94 (0.7 to 1.25)  | 65.1            | 71.3            |
| W   | Colon and Rectum           | Chronic Myeloid Leukemia         | 68770          | 30                     | 0.6                               | 0.05                                  | 23.7                   | 1.27 (0.86 to 1.81) | 65.1            | 75.9            |
| W   | Colon and Rectum           | Corpus and Uterus, NOS           | 68770          | 521                    | 11.1                              | 0.88                                  | 382.3                  | 1.36 (1.25 to 1.49) | 65.1            | 70.4            |
| W   | Colon and Rectum           | Esophagus                        | 68770          | 52                     | 1.1                               | 0.09                                  | 41.6                   | 1.25 (0.93 to 1.64) | 65.1            | 76.3            |
| W   | Colon and Rectum           | Eye and Orbit                    | 68770          | 12                     | 0.3                               | 0.02                                  | 10.0                   | 1.2 (0.62 to 2.09)  | 65.1            | 73.9            |
| W   | Colon and Rectum           | Gallbladder and Other Biliary    | 68770          | 66                     | 1.4                               | 0.11                                  | 71.6                   | 0.92 (0.71 to 1.17) | 65.1            | 75.9            |
| W   | Colon and Rectum           | Hodgkin Lymphoma                 | 68770          | 8                      | 0.2                               | 0.01                                  | 13.5                   | 0.6 (0.26 to 1.17)  | 65.1            | 71.8            |
| W   | Colon and Rectum           | Kidney and Renal Pelvis          | 68770          | 162                    | 3.4                               | 0.27                                  | 170.6                  | 0.95 (0.81 to 1.11) | 65.1            | 73.9            |
| W   | Colon and Rectum           | Larynx                           | 68770          | 18                     | 0.4                               | 0.03                                  | 17.1                   | 1.05 (0.62 to 1.67) | 65.1            | 77.6            |
| W   | Colon and Rectum           | Liver and Intrahepatic Bile Duct | 68770          | 90                     | 1.9                               | 0.15                                  | 94.2                   | 0.96 (0.77 to 1.18) | 65.1            | 75.5            |
| W   | Colon and Rectum           | Lung and Bronchus                | 68770          | 1185                   | 25.2                              | 2.01                                  | 1047.3                 | 1.13 (1.07 to 1.2)  | 65.1            | 76.6            |
| W   | Colon and Rectum           | Melanoma of the Skin             | 68770          | 169                    | 3.6                               | 0.29                                  | 205.2                  | 0.82 (0.7 to 0.96)  | 65.1            | 74.5            |
| W   | Colon and Rectum           | Myeloma                          | 68770          | 109                    | 2.3                               | 0.18                                  | 112.4                  | 0.97 (0.8 to 1.17)  | 65.1            | 76.1            |
| W   | Colon and Rectum           | Non-Hodgkin Lymphoma             | 68770          | 396                    | 8.4                               | 0.67                                  | 400.5                  | 0.99 (0.89 to 1.09) | 65.1            | 78.3            |
| W   | Colon and Rectum           | Oral Cavity and Pharynx          | 68770          | 105                    | 2.2                               | 0.18                                  | 107.2                  | 0.98 (0.8 to 1.19)  | 65.1            | 73.9            |
| W   | Colon and Rectum           | Ovary                            | 68770          | 151                    | 3.2                               | 0.26                                  | 190.5                  | 0.79 (0.67 to 0.93) | 65.1            | 74.5            |
| W   | Colon and Rectum           | Pancreas                         | 68770          | 271                    | 5.8                               | 0.46                                  | 267.4                  | 1.01 (0.9 to 1.14)  | 65.1            | 77.7            |
| W   | Colon and Rectum           | Small Intestine                  | 68770          | 81                     | 1.7                               | 0.14                                  | 34.2                   | 2.37 (1.88 to 2.94) | 65.1            | 73.0            |
| W   | Colon and Rectum           | Soft Tissue including Heart      | 68770          | 50                     | 1.1                               | 0.08                                  | 37.0                   | 1.35 (1 to 1.78)    | 65.1            | 72.1            |
| W   | Colon and Rectum           | Stomach                          | 68770          | 153                    | 3.3                               | 0.26                                  | 119.6                  | 1.28 (1.08 to 1.5)  | 65.1            | 76.1            |
| W   | Colon and Rectum           | Thyroid                          | 68770          | 134                    | 2.9                               | 0.23                                  | 113.2                  | 1.18 (0.99 to 1.4)  | 65.1            | 69.6            |

| Sex | First Primary Cancer (FPC) | Subsequent Primary Cancer (SPC)  | Survivors, No. | Observed Number of SPC | Incidence per 10,000 Person-years | % Contribution to the Total Incidence | Expected Number of SPC | SIR (95% CI)        | Mean Age at FPC | Mean Age at SPC |
|-----|----------------------------|----------------------------------|----------------|------------------------|-----------------------------------|---------------------------------------|------------------------|---------------------|-----------------|-----------------|
| W   | Colon and Rectum           | Urinary Bladder                  | 68770          | 253                    | 5.4                               | 0.43                                  | 209.8                  | 1.21 (1.06 to 1.36) | 65.1            | 77.1            |
| W   | Colon and Rectum           | Vulva and Other Genital Organs   | 68770          | 86                     | 1.8                               | 0.15                                  | 82.0                   | 1.05 (0.84 to 1.3)  | 65.1            | 75.5            |
| W   | Corpus and Uterus, NOS     | Acute Lymphocytic Leukemia       | 62859          | 9                      | 0.2                               | 0.02                                  | 6.0                    | 1.49 (0.68 to 2.83) | 60.3            | 69.2            |
| W   | Corpus and Uterus, NOS     | Acute Non-Lymphocytic Leukemia   | 62859          | 92                     | 1.9                               | 0.16                                  | 62.3                   | 1.48 (1.19 to 1.81) | 60.3            | 72.9            |
| W   | Corpus and Uterus, NOS     | Anus, Anal Canal and Anorectum   | 62859          | 17                     | 0.3                               | 0.03                                  | 31.1                   | 0.55 (0.32 to 0.88) | 60.3            | 69.9            |
| W   | Corpus and Uterus, NOS     | Bones and Joints                 | 62859          | 9                      | 0.2                               | 0.02                                  | 5.8                    | 1.55 (0.71 to 2.93) | 60.3            | 66.9            |
| W   | Corpus and Uterus, NOS     | Brain and Other Nervous System   | 62859          | 62                     | 1.3                               | 0.11                                  | 66.6                   | 0.93 (0.71 to 1.19) | 60.3            | 69.5            |
| W   | Corpus and Uterus, NOS     | Breast                           | 62859          | 1972                   | 39.8                              | 3.34                                  | 1904.0                 | 1.04 (0.99 to 1.08) | 60.3            | 72.1            |
| W   | Corpus and Uterus, NOS     | Chronic Myeloid Leukemia         | 62859          | 22                     | 0.4                               | 0.04                                  | 21.8                   | 1.01 (0.63 to 1.53) | 60.3            | 74.1            |
| W   | Corpus and Uterus, NOS     | Colon and Rectum                 | 62859          | 970                    | 19.6                              | 1.64                                  | 693.8                  | 1.4 (1.31 to 1.49)  | 60.3            | 71.9            |
| W   | Corpus and Uterus, NOS     | Esophagus                        | 62859          | 30                     | 0.6                               | 0.05                                  | 37.5                   | 0.8 (0.54 to 1.14)  | 60.3            | 74.3            |
| W   | Corpus and Uterus, NOS     | Eye and Orbit                    | 62859          | 11                     | 0.2                               | 0.02                                  | 10.9                   | 1.01 (0.51 to 1.81) | 60.3            | 68.9            |
| W   | Corpus and Uterus, NOS     | Gallbladder and Other Biliary    | 62859          | 59                     | 1.2                               | 0.10                                  | 62.7                   | 0.94 (0.72 to 1.22) | 60.3            | 73.2            |
| W   | Corpus and Uterus, NOS     | Hodgkin Lymphoma                 | 62859          | 21                     | 0.4                               | 0.04                                  | 13.8                   | 1.53 (0.95 to 2.34) | 60.3            | 71.2            |
| W   | Corpus and Uterus, NOS     | Kidney and Renal Pelvis          | 62859          | 194                    | 3.9                               | 0.33                                  | 169.1                  | 1.15 (0.99 to 1.32) | 60.3            | 70.9            |
| W   | Corpus and Uterus, NOS     | Larynx                           | 62859          | 13                     | 0.3                               | 0.02                                  | 17.6                   | 0.74 (0.39 to 1.26) | 60.3            | 69.4            |
| W   | Corpus and Uterus, NOS     | Liver and Intrahepatic Bile Duct | 62859          | 77                     | 1.6                               | 0.13                                  | 84.8                   | 0.91 (0.72 to 1.14) | 60.3            | 71.7            |
| W   | Corpus and Uterus, NOS     | Lung and Bronchus                | 62859          | 728                    | 14.7                              | 1.23                                  | 1005.7                 | 0.72 (0.67 to 0.78) | 60.3            | 74.1            |
| W   | Corpus and Uterus, NOS     | Melanoma of the Skin             | 62859          | 222                    | 4.5                               | 0.38                                  | 227.4                  | 0.98 (0.85 to 1.11) | 60.3            | 72.2            |
| W   | Corpus and Uterus, NOS     | Myeloma                          | 62859          | 100                    | 2.0                               | 0.17                                  | 99.8                   | 1 (0.82 to 1.22)    | 60.3            | 73.6            |
| W   | Corpus and Uterus, NOS     | Non-Hodgkin Lymphoma             | 62859          | 356                    | 7.2                               | 0.60                                  | 383.8                  | 0.93 (0.83 to 1.03) | 60.3            | 73.3            |
| W   | Corpus and Uterus, NOS     | Oral Cavity and Pharynx          | 62859          | 98                     | 2.0                               | 0.17                                  | 105.2                  | 0.93 (0.76 to 1.14) | 60.3            | 73.9            |
| W   | Corpus and Uterus, NOS     | Pancreas                         | 62859          | 236                    | 4.8                               | 0.40                                  | 233.2                  | 1.01 (0.89 to 1.15) | 60.3            | 74.5            |
| W   | Corpus and Uterus, NOS     | Small Intestine                  | 62859          | 41                     | 0.8                               | 0.07                                  | 32.5                   | 1.26 (0.91 to 1.71) | 60.3            | 67.4            |
| W   | Corpus and Uterus, NOS     | Soft Tissue including Heart      | 62859          | 52                     | 1.1                               | 0.09                                  | 35.6                   | 1.46 (1.09 to 1.92) | 60.3            | 69.4            |
| W   | Corpus and Uterus, NOS     | Stomach                          | 62859          | 89                     | 1.8                               | 0.15                                  | 97.3                   | 0.92 (0.74 to 1.13) | 60.3            | 72.6            |
| W   | Corpus and Uterus, NOS     | Thyroid                          | 62859          | 150                    | 3.0                               | 0.25                                  | 133.4                  | 1.13 (0.95 to 1.32) | 60.3            | 64.9            |
| W   | Corpus and Uterus, NOS     | Urinary Bladder                  | 62859          | 247                    | 5.0                               | 0.42                                  | 190.3                  | 1.3 (1.14 to 1.47)  | 60.3            | 75.0            |
| W   | Esophagus                  | Breast                           | 846            | 18                     | 39.0                              | 0.03                                  | 18.2                   | 0.99 (0.59 to 1.56) | 65.0            | 75.2            |
| W   | Esophagus                  | Colon and Rectum                 | 846            | 14                     | 30.3                              | 0.02                                  | 7.5                    | 1.87 (1.02 to 3.14) | 65.0            | 73.3            |
| W   | Esophagus                  | Corpus and Uterus, NOS           | 846            | 5                      | 10.8                              | 0.01                                  | 4.0                    | 1.26 (0.41 to 2.94) | 65.0            | 72.2            |
| W   | Esophagus                  | Lung and Bronchus                | 846            | 40                     | 86.7                              | 0.07                                  | 10.6                   | 3.78 (2.7 to 5.14)  | 65.0            | 71.5            |

| Sex | First Primary Cancer (FPC)    | Subsequent Primary Cancer (SPC) | Survivors, No. | Observed Number of SPC | Incidence per 10,000 Person-years | % Contribution to the Total Incidence | Expected Number of SPC | SIR (95% CI)          | Mean Age at FPC | Mean Age at SPC |
|-----|-------------------------------|---------------------------------|----------------|------------------------|-----------------------------------|---------------------------------------|------------------------|-----------------------|-----------------|-----------------|
| W   | Esophagus                     | Oral Cavity and Pharynx         | 846            | 18                     | 39.0                              | 0.03                                  | 1.0                    | 17.22 (10.2 to 27.21) | 65.0            | 68.5            |
| W   | Esophagus                     | Stomach                         | 846            | 6                      | 13.0                              | 0.01                                  | 1.1                    | 5.47 (2.01 to 11.92)  | 65.0            | 73.9            |
| W   | Esophagus                     | Urinary Bladder                 | 846            | 6                      | 13.0                              | 0.01                                  | 2.0                    | 3.01 (1.1 to 6.54)    | 65.0            | 80.8            |
| W   | Eye and Orbit                 | Breast                          | 1378           | 36                     | 35.2                              | 0.06                                  | 35.8                   | 1.01 (0.7 to 1.39)    | 57.9            | 67.4            |
| W   | Eye and Orbit                 | Colon and Rectum                | 1378           | 11                     | 10.8                              | 0.02                                  | 12.3                   | 0.9 (0.45 to 1.61)    | 57.9            | 74.4            |
| W   | Eye and Orbit                 | Corpus and Uterus, NOS          | 1378           | 5                      | 4.9                               | 0.01                                  | 7.9                    | 0.64 (0.21 to 1.48)   | 57.9            | 62.3            |
| W   | Eye and Orbit                 | Lung and Bronchus               | 1378           | 22                     | 21.5                              | 0.04                                  | 17.7                   | 1.24 (0.78 to 1.88)   | 57.9            | 70.7            |
| W   | Eye and Orbit                 | Melanoma of the Skin            | 1378           | 18                     | 17.6                              | 0.03                                  | 4.8                    | 3.75 (2.22 to 5.92)   | 57.9            | 69.7            |
| W   | Eye and Orbit                 | Non-Hodgkin Lymphoma            | 1378           | 9                      | 8.8                               | 0.02                                  | 7.0                    | 1.28 (0.58 to 2.43)   | 57.9            | 76.2            |
| W   | Eye and Orbit                 | Ovary                           | 1378           | 5                      | 4.9                               | 0.01                                  | 3.6                    | 1.38 (0.45 to 3.23)   | 57.9            | 64.9            |
| W   | Gallbladder and Other Biliary | Breast                          | 1314           | 30                     | 36.8                              | 0.05                                  | 30.4                   | 0.99 (0.67 to 1.41)   | 64.4            | 71.9            |
| W   | Gallbladder and Other Biliary | Colon and Rectum                | 1314           | 22                     | 27.0                              | 0.04                                  | 13.2                   | 1.66 (1.04 to 2.52)   | 64.4            | 77.0            |
| W   | Gallbladder and Other Biliary | Lung and Bronchus               | 1314           | 31                     | 38.0                              | 0.05                                  | 17.6                   | 1.76 (1.19 to 2.5)    | 64.4            | 75.5            |
| W   | Gallbladder and Other Biliary | Non-Hodgkin Lymphoma            | 1314           | 9                      | 11.0                              | 0.02                                  | 6.7                    | 1.34 (0.61 to 2.54)   | 64.4            | 78.4            |
| W   | Gallbladder and Other Biliary | Ovary                           | 1314           | 6                      | 7.4                               | 0.01                                  | 3.2                    | 1.88 (0.69 to 4.08)   | 64.4            | 80.3            |
| W   | Gallbladder and Other Biliary | Pancreas                        | 1314           | 9                      | 11.0                              | 0.02                                  | 4.4                    | 2.03 (0.93 to 3.84)   | 64.4            | 73.0            |
| W   | Gallbladder and Other Biliary | Stomach                         | 1314           | 7                      | 8.6                               | 0.01                                  | 2.1                    | 3.36 (1.35 to 6.93)   | 64.4            | 63.4            |
| W   | Hodgkin Lymphoma              | Acute Lymphocytic Leukemia      | 6263           | 5                      | 0.8                               | 0.01                                  | 0.5                    | 10.52 (3.42 to 24.56) | 38.5            | 47.7            |
| W   | Hodgkin Lymphoma              | Acute Non-Lymphocytic Leukemia  | 6263           | 14                     | 2.4                               | 0.02                                  | 2.5                    | 5.63 (3.08 to 9.45)   | 38.5            | 60.2            |
| W   | Hodgkin Lymphoma              | Anus, Anal Canal and Anorectum  | 6263           | 5                      | 0.8                               | 0.01                                  | 1.7                    | 2.99 (0.97 to 6.98)   | 38.5            | 54.3            |
| W   | Hodgkin Lymphoma              | Brain and Other Nervous System  | 6263           | 5                      | 0.8                               | 0.01                                  | 3.7                    | 1.36 (0.44 to 3.17)   | 38.5            | 56.2            |
| W   | Hodgkin Lymphoma              | Breast                          | 6263           | 157                    | 26.7                              | 0.27                                  | 109.0                  | 1.44 (1.22 to 1.69)   | 38.5            | 52.6            |
| W   | Hodgkin Lymphoma              | Cervix Uteri                    | 6263           | 8                      | 1.4                               | 0.01                                  | 7.0                    | 1.14 (0.49 to 2.25)   | 38.5            | 49.6            |
| W   | Hodgkin Lymphoma              | Colon and Rectum                | 6263           | 46                     | 7.8                               | 0.08                                  | 25.5                   | 1.8 (1.32 to 2.4)     | 38.5            | 62.6            |
| W   | Hodgkin Lymphoma              | Corpus and Uterus, NOS          | 6263           | 24                     | 4.1                               | 0.04                                  | 22.0                   | 1.09 (0.7 to 1.63)    | 38.5            | 60.4            |
| W   | Hodgkin Lymphoma              | Esophagus                       | 6263           | 5                      | 0.8                               | 0.01                                  | 1.2                    | 4.21 (1.37 to 9.83)   | 38.5            | 56.1            |
| W   | Hodgkin Lymphoma              | Kidney and Renal Pelvis         | 6263           | 6                      | 1.0                               | 0.01                                  | 7.8                    | 0.77 (0.28 to 1.69)   | 38.5            | 69.1            |
| W   | Hodgkin Lymphoma              | Lung and Bronchus               | 6263           | 77                     | 13.1                              | 0.13                                  | 31.0                   | 2.48 (1.96 to 3.1)    | 38.5            | 67.5            |
| W   | Hodgkin Lymphoma              | Melanoma of the Skin            | 6263           | 27                     | 4.6                               | 0.05                                  | 16.1                   | 1.67 (1.1 to 2.44)    | 38.5            | 53.4            |
| W   | Hodgkin Lymphoma              | Myeloma                         | 6263           | 5                      | 0.8                               | 0.01                                  | 3.7                    | 1.35 (0.44 to 3.16)   | 38.5            | 60.0            |
| W   | Hodgkin Lymphoma              | Non-Hodgkin Lymphoma            | 6263           | 73                     | 12.4                              | 0.12                                  | 14.5                   | 5.04 (3.95 to 6.34)   | 38.5            | 66.7            |
| W   | Hodgkin Lymphoma              | Oral Cavity and Pharynx         | 6263           | 19                     | 3.2                               | 0.03                                  | 4.7                    | 4 (2.41 to 6.25)      | 38.5            | 54.9            |

| Sex | First Primary Cancer (FPC) | Subsequent Primary Cancer (SPC)  | Survivors, No. | Observed Number of SPC | Incidence per 10,000 Person-years | % Contribution to the Total Incidence | Expected Number of SPC | SIR (95% CI)        | Mean Age at FPC | Mean Age at SPC |
|-----|----------------------------|----------------------------------|----------------|------------------------|-----------------------------------|---------------------------------------|------------------------|---------------------|-----------------|-----------------|
| W   | Hodgkin Lymphoma           | Ovary                            | 6263           | 8                      | 1.4                               | 0.01                                  | 9.7                    | 0.82 (0.36 to 1.62) | 38.5            | 60.4            |
| W   | Hodgkin Lymphoma           | Pancreas                         | 6263           | 8                      | 1.4                               | 0.01                                  | 7.2                    | 1.11 (0.48 to 2.18) | 38.5            | 65.7            |
| W   | Hodgkin Lymphoma           | Soft Tissue including Heart      | 6263           | 9                      | 1.5                               | 0.02                                  | 2.0                    | 4.46 (2.04 to 8.46) | 38.5            | 48.5            |
| W   | Hodgkin Lymphoma           | Stomach                          | 6263           | 7                      | 1.2                               | 0.01                                  | 3.6                    | 1.93 (0.78 to 3.97) | 38.5            | 61.1            |
| W   | Hodgkin Lymphoma           | Thyroid                          | 6263           | 35                     | 5.9                               | 0.06                                  | 17.4                   | 2.01 (1.4 to 2.79)  | 38.5            | 42.0            |
| W   | Hodgkin Lymphoma           | Urinary Bladder                  | 6263           | 11                     | 1.9                               | 0.02                                  | 5.6                    | 1.96 (0.98 to 3.52) | 38.5            | 67.5            |
| W   | Hodgkin Lymphoma           | Vulva and Other Genital Organs   | 6263           | 7                      | 1.2                               | 0.01                                  | 3.4                    | 2.06 (0.83 to 4.24) | 38.5            | 51.8            |
| W   | Kidney and Renal Pelvis    | Acute Non-Lymphocytic Leukemia   | 15980          | 17                     | 1.6                               | 0.03                                  | 12.7                   | 1.33 (0.78 to 2.14) | 60.5            | 75.1            |
| W   | Kidney and Renal Pelvis    | Anus, Anal Canal and Anorectum   | 15980          | 6                      | 0.6                               | 0.01                                  | 6.5                    | 0.93 (0.34 to 2.02) | 60.5            | 72.1            |
| W   | Kidney and Renal Pelvis    | Brain and Other Nervous System   | 15980          | 13                     | 1.2                               | 0.02                                  | 13.4                   | 0.97 (0.52 to 1.66) | 60.5            | 67.8            |
| W   | Kidney and Renal Pelvis    | Breast                           | 15980          | 407                    | 38.4                              | 0.69                                  | 389.0                  | 1.05 (0.95 to 1.15) | 60.5            | 71.3            |
| W   | Kidney and Renal Pelvis    | Cervix Uteri                     | 15980          | 7                      | 0.7                               | 0.01                                  | 11.7                   | 0.6 (0.24 to 1.23)  | 60.5            | 64.4            |
| W   | Kidney and Renal Pelvis    | Chronic Myeloid Leukemia         | 15980          | 5                      | 0.5                               | 0.01                                  | 4.5                    | 1.11 (0.36 to 2.6)  | 60.5            | 71.6            |
| W   | Kidney and Renal Pelvis    | Colon and Rectum                 | 15980          | 152                    | 14.4                              | 0.26                                  | 142.0                  | 1.07 (0.91 to 1.26) | 60.5            | 74.1            |
| W   | Kidney and Renal Pelvis    | Corpus and Uterus, NOS           | 15980          | 92                     | 8.7                               | 0.16                                  | 86.4                   | 1.06 (0.86 to 1.31) | 60.5            | 68.7            |
| W   | Kidney and Renal Pelvis    | Gallbladder and Other Biliary    | 15980          | 6                      | 0.6                               | 0.01                                  | 12.9                   | 0.47 (0.17 to 1.02) | 60.5            | 76.4            |
| W   | Kidney and Renal Pelvis    | Larynx                           | 15980          | 9                      | 0.8                               | 0.02                                  | 3.7                    | 2.46 (1.12 to 4.66) | 60.5            | 72.2            |
| W   | Kidney and Renal Pelvis    | Liver and Intrahepatic Bile Duct | 15980          | 21                     | 2.0                               | 0.04                                  | 17.7                   | 1.19 (0.73 to 1.81) | 60.5            | 71.8            |
| W   | Kidney and Renal Pelvis    | Lung and Bronchus                | 15980          | 281                    | 26.5                              | 0.48                                  | 202.2                  | 1.39 (1.23 to 1.56) | 60.5            | 73.3            |
| W   | Kidney and Renal Pelvis    | Melanoma of the Skin             | 15980          | 43                     | 4.1                               | 0.07                                  | 45.8                   | 0.94 (0.68 to 1.26) | 60.5            | 72.1            |
| W   | Kidney and Renal Pelvis    | Myeloma                          | 15980          | 30                     | 2.8                               | 0.05                                  | 21.7                   | 1.38 (0.93 to 1.98) | 60.5            | 72.3            |
| W   | Kidney and Renal Pelvis    | Non-Hodgkin Lymphoma             | 15980          | 82                     | 7.7                               | 0.14                                  | 76.7                   | 1.07 (0.85 to 1.33) | 60.5            | 72.9            |
| W   | Kidney and Renal Pelvis    | Oral Cavity and Pharynx          | 15980          | 24                     | 2.3                               | 0.04                                  | 21.3                   | 1.13 (0.72 to 1.68) | 60.5            | 74.1            |
| W   | Kidney and Renal Pelvis    | Ovary                            | 15980          | 20                     | 1.9                               | 0.03                                  | 38.6                   | 0.52 (0.32 to 0.8)  | 60.5            | 74.5            |
| W   | Kidney and Renal Pelvis    | Pancreas                         | 15980          | 72                     | 6.8                               | 0.12                                  | 48.5                   | 1.48 (1.16 to 1.87) | 60.5            | 74.4            |
| W   | Kidney and Renal Pelvis    | Small Intestine                  | 15980          | 9                      | 0.8                               | 0.02                                  | 7.0                    | 1.29 (0.59 to 2.45) | 60.5            | 71.2            |
| W   | Kidney and Renal Pelvis    | Soft Tissue including Heart      | 15980          | 6                      | 0.6                               | 0.01                                  | 7.4                    | 0.81 (0.3 to 1.76)  | 60.5            | 72.0            |
| W   | Kidney and Renal Pelvis    | Stomach                          | 15980          | 25                     | 2.4                               | 0.04                                  | 20.7                   | 1.21 (0.78 to 1.79) | 60.5            | 75.5            |
| W   | Kidney and Renal Pelvis    | Thyroid                          | 15980          | 73                     | 6.9                               | 0.12                                  | 28.7                   | 2.55 (2 to 3.2)     | 60.5            | 64.7            |
| W   | Kidney and Renal Pelvis    | Urinary Bladder                  | 15980          | 56                     | 5.3                               | 0.09                                  | 38.2                   | 1.47 (1.11 to 1.9)  | 60.5            | 76.3            |
| W   | Kidney and Renal Pelvis    | Vulva and Other Genital Organs   | 15980          | 16                     | 1.5                               | 0.03                                  | 16.3                   | 0.98 (0.56 to 1.59) | 60.5            | 74.9            |
| W   | Larynx                     | Breast                           | 2096           | 40                     | 29.1                              | 0.07                                  | 52.7                   | 0.76 (0.54 to 1.03) | 60.9            | 70.6            |

| Sex | First Primary Cancer (FPC)       | Subsequent Primary Cancer (SPC)  | Survivors, No. | Observed Number of SPC | Incidence per 10,000 Person-years | % Contribution to the Total Incidence | Expected Number of SPC | SIR (95% CI)           | Mean Age at FPC | Mean Age at SPC |
|-----|----------------------------------|----------------------------------|----------------|------------------------|-----------------------------------|---------------------------------------|------------------------|------------------------|-----------------|-----------------|
| W   | Larynx                           | Colon and Rectum                 | 2096           | 36                     | 26.1                              | 0.06                                  | 20.0                   | 1.8 (1.26 to 2.49)     | 60.9            | 74.6            |
| W   | Larynx                           | Corpus and Uterus, NOS           | 2096           | 7                      | 5.1                               | 0.01                                  | 11.7                   | 0.6 (0.24 to 1.23)     | 60.9            | 72.0            |
| W   | Larynx                           | Esophagus                        | 2096           | 13                     | 9.4                               | 0.02                                  | 1.1                    | 11.98 (6.38 to 20.48)  | 60.9            | 67.4            |
| W   | Larynx                           | Kidney and Renal Pelvis          | 2096           | 7                      | 5.1                               | 0.01                                  | 4.8                    | 1.47 (0.59 to 3.03)    | 60.9            | 73.8            |
| W   | Larynx                           | Liver and Intrahepatic Bile Duct | 2096           | 6                      | 4.4                               | 0.01                                  | 2.3                    | 2.66 (0.98 to 5.8)     | 60.9            | 64.9            |
| W   | Larynx                           | Lung and Bronchus                | 2096           | 231                    | 167.8                             | 0.39                                  | 28.6                   | 8.09 (7.08 to 9.2)     | 60.9            | 71.4            |
| W   | Larynx                           | Non-Hodgkin Lymphoma             | 2096           | 12                     | 8.7                               | 0.02                                  | 10.4                   | 1.15 (0.6 to 2.02)     | 60.9            | 71.7            |
| W   | Larynx                           | Oral Cavity and Pharynx          | 2096           | 55                     | 39.9                              | 0.09                                  | 2.9                    | 19.29 (14.53 to 25.11) | 60.9            | 69.4            |
| W   | Larynx                           | Ovary                            | 2096           | 6                      | 4.4                               | 0.01                                  | 5.3                    | 1.12 (0.41 to 2.44)    | 60.9            | 67.1            |
| W   | Larynx                           | Pancreas                         | 2096           | 6                      | 4.4                               | 0.01                                  | 6.5                    | 0.93 (0.34 to 2.02)    | 60.9            | 72.2            |
| W   | Larynx                           | Stomach                          | 2096           | 5                      | 3.6                               | 0.01                                  | 2.8                    | 1.82 (0.59 to 4.24)    | 60.9            | 72.3            |
| W   | Larynx                           | Urinary Bladder                  | 2096           | 7                      | 5.1                               | 0.01                                  | 5.2                    | 1.34 (0.54 to 2.76)    | 60.9            | 71.9            |
| W   | Liver and Intrahepatic Bile Duct | Breast                           | 1458           | 13                     | 19.0                              | 0.02                                  | 22.7                   | 0.57 (0.31 to 0.98)    | 60.4            | 69.2            |
| W   | Liver and Intrahepatic Bile Duct | Colon and Rectum                 | 1458           | 9                      | 13.1                              | 0.02                                  | 7.8                    | 1.15 (0.52 to 2.18)    | 60.4            | 69.9            |
| W   | Liver and Intrahepatic Bile Duct | Lung and Bronchus                | 1458           | 20                     | 29.2                              | 0.03                                  | 10.8                   | 1.85 (1.13 to 2.85)    | 60.4            | 68.1            |
| W   | Liver and Intrahepatic Bile Duct | Non-Hodgkin Lymphoma             | 1458           | 13                     | 19.0                              | 0.02                                  | 4.0                    | 3.22 (1.71 to 5.5)     | 60.4            | 69.0            |
| W   | Lung and Bronchus                | Acute Non-Lymphocytic Leukemia   | 24065          | 32                     | 2.4                               | 0.05                                  | 18.5                   | 1.73 (1.19 to 2.45)    | 64.8            | 75.5            |
| W   | Lung and Bronchus                | Anus, Anal Canal and Anorectum   | 24065          | 8                      | 0.6                               | 0.01                                  | 8.5                    | 0.94 (0.41 to 1.86)    | 64.8            | 71.2            |
| W   | Lung and Bronchus                | Brain and Other Nervous System   | 24065          | 10                     | 0.8                               | 0.02                                  | 18.7                   | 0.53 (0.26 to 0.98)    | 64.8            | 68.2            |
| W   | Lung and Bronchus                | Breast                           | 24065          | 533                    | 40.4                              | 0.90                                  | 523.5                  | 1.02 (0.93 to 1.11)    | 64.8            | 72.9            |
| W   | Lung and Bronchus                | Cervix Uteri                     | 24065          | 8                      | 0.6                               | 0.01                                  | 14.5                   | 0.55 (0.24 to 1.09)    | 64.8            | 68.1            |
| W   | Lung and Bronchus                | Chronic Myeloid Leukemia         | 24065          | 13                     | 1.0                               | 0.02                                  | 6.4                    | 2.02 (1.08 to 3.46)    | 64.8            | 69.4            |
| W   | Lung and Bronchus                | Colon and Rectum                 | 24065          | 278                    | 21.1                              | 0.47                                  | 210.9                  | 1.32 (1.17 to 1.48)    | 64.8            | 75.7            |
| W   | Lung and Bronchus                | Corpus and Uterus, NOS           | 24065          | 67                     | 5.1                               | 0.11                                  | 113.3                  | 0.59 (0.46 to 0.75)    | 64.8            | 72.0            |
| W   | Lung and Bronchus                | Esophagus                        | 24065          | 41                     | 3.1                               | 0.07                                  | 11.4                   | 3.6 (2.59 to 4.89)     | 64.8            | 72.8            |
| W   | Lung and Bronchus                | Eye and Orbit                    | 24065          | 6                      | 0.5                               | 0.01                                  | 3.0                    | 2.01 (0.74 to 4.38)    | 64.8            | 73.1            |
| W   | Lung and Bronchus                | Gallbladder and Other Biliary    | 24065          | 15                     | 1.1                               | 0.03                                  | 18.9                   | 0.79 (0.44 to 1.31)    | 64.8            | 74.9            |
| W   | Lung and Bronchus                | Kidney and Renal Pelvis          | 24065          | 68                     | 5.2                               | 0.12                                  | 48.6                   | 1.4 (1.09 to 1.77)     | 64.8            | 73.3            |
| W   | Lung and Bronchus                | Larynx                           | 24065          | 36                     | 2.7                               | 0.06                                  | 5.1                    | 7.03 (4.93 to 9.74)    | 64.8            | 70.6            |
| W   | Lung and Bronchus                | Liver and Intrahepatic Bile Duct | 24065          | 30                     | 2.3                               | 0.05                                  | 25.0                   | 1.2 (0.81 to 1.71)     | 64.8            | 74.0            |
| W   | Lung and Bronchus                | Melanoma of the Skin             | 24065          | 57                     | 4.3                               | 0.10                                  | 61.1                   | 0.93 (0.71 to 1.21)    | 64.8            | 74.6            |
| W   | Lung and Bronchus                | Myeloma                          | 24065          | 29                     | 2.2                               | 0.05                                  | 30.6                   | 0.95 (0.63 to 1.36)    | 64.8            | 75.4            |



| Sex | First Primary Cancer (FPC) | Subsequent Primary Cancer (SPC)  | Survivors, No. | Observed Number of SPC | Incidence per 10,000 Person-years | % Contribution to the Total Incidence | Expected Number of SPC | SIR (95% CI)        | Mean Age at FPC | Mean Age at SPC |
|-----|----------------------------|----------------------------------|----------------|------------------------|-----------------------------------|---------------------------------------|------------------------|---------------------|-----------------|-----------------|
| W   | Lung and Bronchus          | Non-Hodgkin Lymphoma             | 24065          | 147                    | 11.2                              | 0.25                                  | 112.0                  | 1.31 (1.11 to 1.54) | 64.8            | 76.3            |
| W   | Lung and Bronchus          | Oral Cavity and Pharynx          | 24065          | 60                     | 4.6                               | 0.10                                  | 30.0                   | 2 (1.53 to 2.58)    | 64.8            | 71.8            |
| W   | Lung and Bronchus          | Ovary                            | 24065          | 49                     | 3.7                               | 0.08                                  | 54.1                   | 0.91 (0.67 to 1.2)  | 64.8            | 73.4            |
| W   | Lung and Bronchus          | Pancreas                         | 24065          | 84                     | 6.4                               | 0.14                                  | 71.0                   | 1.18 (0.94 to 1.46) | 64.8            | 75.2            |
| W   | Lung and Bronchus          | Small Intestine                  | 24065          | 6                      | 0.5                               | 0.01                                  | 9.6                    | 0.63 (0.23 to 1.37) | 64.8            | 77.8            |
| W   | Lung and Bronchus          | Soft Tissue including Heart      | 24065          | 15                     | 1.1                               | 0.03                                  | 10.2                   | 1.47 (0.82 to 2.43) | 64.8            | 74.6            |
| W   | Lung and Bronchus          | Stomach                          | 24065          | 28                     | 2.1                               | 0.05                                  | 30.1                   | 0.93 (0.62 to 1.34) | 64.8            | 77.7            |
| W   | Lung and Bronchus          | Thyroid                          | 24065          | 44                     | 3.3                               | 0.07                                  | 33.1                   | 1.33 (0.97 to 1.79) | 64.8            | 66.9            |
| W   | Lung and Bronchus          | Urinary Bladder                  | 24065          | 124                    | 9.4                               | 0.21                                  | 57.3                   | 2.17 (1.8 to 2.58)  | 64.8            | 75.6            |
| W   | Lung and Bronchus          | Vulva and Other Genital Organs   | 24065          | 20                     | 1.5                               | 0.03                                  | 22.8                   | 0.88 (0.54 to 1.36) | 64.8            | 73.8            |
| W   | Melanoma of the Skin       | Acute Non-Lymphocytic Leukemia   | 40414          | 24                     | 0.7                               | 0.04                                  | 28.8                   | 0.83 (0.53 to 1.24) | 51.3            | 71.5            |
| W   | Melanoma of the Skin       | Anus, Anal Canal and Anorectum   | 40414          | 21                     | 0.6                               | 0.04                                  | 18.2                   | 1.16 (0.72 to 1.77) | 51.3            | 65.3            |
| W   | Melanoma of the Skin       | Bones and Joints                 | 40414          | 5                      | 0.1                               | 0.01                                  | 3.6                    | 1.41 (0.46 to 3.29) | 51.3            | 61.1            |
| W   | Melanoma of the Skin       | Brain and Other Nervous System   | 40414          | 45                     | 1.3                               | 0.08                                  | 36.5                   | 1.23 (0.9 to 1.65)  | 51.3            | 66.2            |
| W   | Melanoma of the Skin       | Breast                           | 40414          | 1067                   | 30.9                              | 1.81                                  | 1044.7                 | 1.02 (0.96 to 1.09) | 51.3            | 65.8            |
| W   | Melanoma of the Skin       | Cervix Uteri                     | 40414          | 17                     | 0.5                               | 0.03                                  | 38.8                   | 0.44 (0.26 to 0.7)  | 51.3            | 59.2            |
| W   | Melanoma of the Skin       | Chronic Myeloid Leukemia         | 40414          | 10                     | 0.3                               | 0.02                                  | 10.8                   | 0.93 (0.45 to 1.71) | 51.3            | 70.9            |
| W   | Melanoma of the Skin       | Colon and Rectum                 | 40414          | 252                    | 7.3                               | 0.43                                  | 305.0                  | 0.83 (0.73 to 0.94) | 51.3            | 72.0            |
| W   | Melanoma of the Skin       | Corpus and Uterus, NOS           | 40414          | 193                    | 5.6                               | 0.33                                  | 232.2                  | 0.83 (0.72 to 0.96) | 51.3            | 66.4            |
| W   | Melanoma of the Skin       | Esophagus                        | 40414          | 6                      | 0.2                               | 0.01                                  | 16.2                   | 0.37 (0.14 to 0.81) | 51.3            | 71.8            |
| W   | Melanoma of the Skin       | Eye and Orbit                    | 40414          | 13                     | 0.4                               | 0.02                                  | 6.1                    | 2.12 (1.13 to 3.63) | 51.3            | 64.5            |
| W   | Melanoma of the Skin       | Gallbladder and Other Biliary    | 40414          | 21                     | 0.6                               | 0.04                                  | 26.5                   | 0.79 (0.49 to 1.21) | 51.3            | 72.8            |
| W   | Melanoma of the Skin       | Hodgkin Lymphoma                 | 40414          | 9                      | 0.3                               | 0.02                                  | 9.0                    | 1.01 (0.46 to 1.91) | 51.3            | 50.0            |
| W   | Melanoma of the Skin       | Kidney and Renal Pelvis          | 40414          | 85                     | 2.5                               | 0.14                                  | 84.1                   | 1.01 (0.81 to 1.25) | 51.3            | 67.5            |
| W   | Melanoma of the Skin       | Liver and Intrahepatic Bile Duct | 40414          | 20                     | 0.6                               | 0.03                                  | 35.8                   | 0.56 (0.34 to 0.86) | 51.3            | 71.2            |
| W   | Melanoma of the Skin       | Lung and Bronchus                | 40414          | 372                    | 10.8                              | 0.63                                  | 435.0                  | 0.86 (0.77 to 0.95) | 51.3            | 72.2            |
| W   | Melanoma of the Skin       | Myeloma                          | 40414          | 53                     | 1.5                               | 0.09                                  | 42.6                   | 1.25 (0.93 to 1.63) | 51.3            | 69.9            |
| W   | Melanoma of the Skin       | Non-Hodgkin Lymphoma             | 40414          | 227                    | 6.6                               | 0.38                                  | 181.8                  | 1.25 (1.09 to 1.42) | 51.3            | 69.7            |
| W   | Melanoma of the Skin       | Oral Cavity and Pharynx          | 40414          | 50                     | 1.4                               | 0.08                                  | 52.7                   | 0.95 (0.7 to 1.25)  | 51.3            | 67.9            |
| W   | Melanoma of the Skin       | Ovary                            | 40414          | 90                     | 2.6                               | 0.15                                  | 101.2                  | 0.89 (0.72 to 1.09) | 51.3            | 63.6            |
| W   | Melanoma of the Skin       | Pancreas                         | 40414          | 87                     | 2.5                               | 0.15                                  | 99.0                   | 0.88 (0.7 to 1.08)  | 51.3            | 71.5            |
| W   | Melanoma of the Skin       | Small Intestine                  | 40414          | 21                     | 0.6                               | 0.04                                  | 15.7                   | 1.33 (0.83 to 2.04) | 51.3            | 63.5            |

| Sex | First Primary Cancer (FPC) | Subsequent Primary Cancer (SPC) | Survivors, No. | Observed Number of SPC | Incidence per 10,000 Person-years | % Contribution to the Total Incidence | Expected Number of SPC | SIR (95% CI)          | Mean Age at FPC | Mean Age at SPC |
|-----|----------------------------|---------------------------------|----------------|------------------------|-----------------------------------|---------------------------------------|------------------------|-----------------------|-----------------|-----------------|
| W   | Melanoma of the Skin       | Soft Tissue including Heart     | 40414          | 32                     | 0.9                               | 0.05                                  | 18.5                   | 1.73 (1.18 to 2.44)   | 51.3            | 67.8            |
| W   | Melanoma of the Skin       | Stomach                         | 40414          | 31                     | 0.9                               | 0.05                                  | 40.2                   | 0.77 (0.53 to 1.1)    | 51.3            | 74.8            |
| W   | Melanoma of the Skin       | Thyroid                         | 40414          | 139                    | 4.0                               | 0.24                                  | 105.0                  | 1.32 (1.11 to 1.56)   | 51.3            | 57.2            |
| W   | Melanoma of the Skin       | Urinary Bladder                 | 40414          | 93                     | 2.7                               | 0.16                                  | 83.3                   | 1.12 (0.9 to 1.37)    | 51.3            | 72.7            |
| W   | Melanoma of the Skin       | Vulva and Other Genital Organs  | 40414          | 25                     | 0.7                               | 0.04                                  | 40.2                   | 0.62 (0.4 to 0.92)    | 51.3            | 68.7            |
| W   | Myeloma                    | Acute Lymphocytic Leukemia      | 5578           | 5                      | 2.1                               | 0.01                                  | 0.3                    | 17.67 (5.74 to 41.24) | 63.0            | 62.4            |
| W   | Myeloma                    | Acute Non-Lymphocytic Leukemia  | 5578           | 16                     | 6.6                               | 0.03                                  | 2.9                    | 5.48 (3.14 to 8.91)   | 63.0            | 68.5            |
| W   | Myeloma                    | Breast                          | 5578           | 70                     | 28.9                              | 0.12                                  | 90.5                   | 0.77 (0.6 to 0.98)    | 63.0            | 70.8            |
| W   | Myeloma                    | Colon and Rectum                | 5578           | 46                     | 19.0                              | 0.08                                  | 33.8                   | 1.36 (1 to 1.82)      | 63.0            | 72.2            |
| W   | Myeloma                    | Corpus and Uterus, NOS          | 5578           | 22                     | 9.1                               | 0.04                                  | 20.6                   | 1.07 (0.67 to 1.62)   | 63.0            | 72.4            |
| W   | Myeloma                    | Kidney and Renal Pelvis         | 5578           | 5                      | 2.1                               | 0.01                                  | 8.3                    | 0.6 (0.2 to 1.4)      | 63.0            | 75.0            |
| W   | Myeloma                    | Lung and Bronchus               | 5578           | 43                     | 17.8                              | 0.07                                  | 47.2                   | 0.91 (0.66 to 1.23)   | 63.0            | 72.2            |
| W   | Myeloma                    | Melanoma of the Skin            | 5578           | 16                     | 6.6                               | 0.03                                  | 9.2                    | 1.74 (0.99 to 2.82)   | 63.0            | 72.9            |
| W   | Myeloma                    | Non-Hodgkin Lymphoma            | 5578           | 22                     | 9.1                               | 0.04                                  | 17.1                   | 1.29 (0.81 to 1.95)   | 63.0            | 76.1            |
| W   | Myeloma                    | Oral Cavity and Pharynx         | 5578           | 12                     | 5.0                               | 0.02                                  | 4.8                    | 2.48 (1.28 to 4.34)   | 63.0            | 61.3            |
| W   | Myeloma                    | Pancreas                        | 5578           | 9                      | 3.7                               | 0.02                                  | 11.6                   | 0.77 (0.35 to 1.47)   | 63.0            | 74.6            |
| W   | Myeloma                    | Thyroid                         | 5578           | 5                      | 2.1                               | 0.01                                  | 6.4                    | 0.78 (0.26 to 1.83)   | 63.0            | 57.8            |
| W   | Non-Hodgkin Lymphoma       | Acute Lymphocytic Leukemia      | 37467          | 12                     | 0.5                               | 0.02                                  | 3.0                    | 4.03 (2.08 to 7.04)   | 61.5            | 69.4            |
| W   | Non-Hodgkin Lymphoma       | Acute Non-Lymphocytic Leukemia  | 37467          | 124                    | 4.9                               | 0.21                                  | 31.0                   | 4 (3.33 to 4.77)      | 61.5            | 69.1            |
| W   | Non-Hodgkin Lymphoma       | Anus, Anal Canal and Anorectum  | 37467          | 18                     | 0.7                               | 0.03                                  | 15.2                   | 1.18 (0.7 to 1.87)    | 61.5            | 70.7            |
| W   | Non-Hodgkin Lymphoma       | Bones and Joints                | 37467          | 5                      | 0.2                               | 0.01                                  | 2.9                    | 1.71 (0.56 to 3.99)   | 61.5            | 70.5            |
| W   | Non-Hodgkin Lymphoma       | Brain and Other Nervous System  | 37467          | 43                     | 1.7                               | 0.07                                  | 32.4                   | 1.33 (0.96 to 1.79)   | 61.5            | 71.2            |
| W   | Non-Hodgkin Lymphoma       | Breast                          | 37467          | 892                    | 35.6                              | 1.51                                  | 912.6                  | 0.98 (0.91 to 1.04)   | 61.5            | 70.8            |
| W   | Non-Hodgkin Lymphoma       | Cervix Uteri                    | 37467          | 21                     | 0.8                               | 0.04                                  | 27.2                   | 0.77 (0.48 to 1.18)   | 61.5            | 62.6            |
| W   | Non-Hodgkin Lymphoma       | Chronic Myeloid Leukemia        | 37467          | 25                     | 1.0                               | 0.04                                  | 11.0                   | 2.28 (1.48 to 3.37)   | 61.5            | 72.3            |
| W   | Non-Hodgkin Lymphoma       | Colon and Rectum                | 37467          | 402                    | 16.0                              | 0.68                                  | 345.6                  | 1.16 (1.05 to 1.28)   | 61.5            | 76.3            |
| W   | Non-Hodgkin Lymphoma       | Corpus and Uterus, NOS          | 37467          | 184                    | 7.3                               | 0.31                                  | 198.6                  | 0.93 (0.8 to 1.07)    | 61.5            | 70.1            |
| W   | Non-Hodgkin Lymphoma       | Esophagus                       | 37467          | 22                     | 0.9                               | 0.04                                  | 18.5                   | 1.19 (0.75 to 1.8)    | 61.5            | 74.1            |
| W   | Non-Hodgkin Lymphoma       | Eye and Orbit                   | 37467          | 5                      | 0.2                               | 0.01                                  | 5.2                    | 0.95 (0.31 to 2.22)   | 61.5            | 72.9            |
| W   | Non-Hodgkin Lymphoma       | Gallbladder and Other Biliary   | 37467          | 33                     | 1.3                               | 0.06                                  | 31.1                   | 1.06 (0.73 to 1.49)   | 61.5            | 77.8            |
| W   | Non-Hodgkin Lymphoma       | Hodgkin Lymphoma                | 37467          | 66                     | 2.6                               | 0.11                                  | 7.0                    | 9.42 (7.29 to 11.99)  | 61.5            | 67.2            |
| W   | Non-Hodgkin Lymphoma       | Kidney and Renal Pelvis         | 37467          | 102                    | 4.1                               | 0.17                                  | 81.9                   | 1.25 (1.02 to 1.51)   | 61.5            | 74.9            |

| Sex | First Primary Cancer (FPC) | Subsequent Primary Cancer (SPC)  | Survivors, No. | Observed Number of SPC | Incidence per 10,000 Person-years | % Contribution to the Total Incidence | Expected Number of SPC | SIR (95% CI)         | Mean Age at FPC | Mean Age at SPC |
|-----|----------------------------|----------------------------------|----------------|------------------------|-----------------------------------|---------------------------------------|------------------------|----------------------|-----------------|-----------------|
| W   | Non-Hodgkin Lymphoma       | Larynx                           | 37467          | 11                     | 0.4                               | 0.02                                  | 8.4                    | 1.32 (0.66 to 2.35)  | 61.5            | 69.4            |
| W   | Non-Hodgkin Lymphoma       | Liver and Intrahepatic Bile Duct | 37467          | 51                     | 2.0                               | 0.09                                  | 41.3                   | 1.24 (0.92 to 1.62)  | 61.5            | 74.0            |
| W   | Non-Hodgkin Lymphoma       | Lung and Bronchus                | 37467          | 714                    | 28.5                              | 1.21                                  | 484.1                  | 1.48 (1.37 to 1.59)  | 61.5            | 74.1            |
| W   | Non-Hodgkin Lymphoma       | Melanoma of the Skin             | 37467          | 172                    | 6.9                               | 0.29                                  | 112.9                  | 1.52 (1.3 to 1.77)   | 61.5            | 72.9            |
| W   | Non-Hodgkin Lymphoma       | Myeloma                          | 37467          | 52                     | 2.1                               | 0.09                                  | 49.3                   | 1.05 (0.79 to 1.38)  | 61.5            | 75.5            |
| W   | Non-Hodgkin Lymphoma       | Oral Cavity and Pharynx          | 37467          | 88                     | 3.5                               | 0.15                                  | 51.3                   | 1.72 (1.38 to 2.11)  | 61.5            | 72.0            |
| W   | Non-Hodgkin Lymphoma       | Ovary                            | 37467          | 80                     | 3.2                               | 0.14                                  | 92.8                   | 0.86 (0.68 to 1.07)  | 61.5            | 72.9            |
| W   | Non-Hodgkin Lymphoma       | Pancreas                         | 37467          | 116                    | 4.6                               | 0.20                                  | 116.4                  | 1 (0.82 to 1.2)      | 61.5            | 76.6            |
| W   | Non-Hodgkin Lymphoma       | Small Intestine                  | 37467          | 13                     | 0.5                               | 0.02                                  | 16.0                   | 0.81 (0.43 to 1.39)  | 61.5            | 71.3            |
| W   | Non-Hodgkin Lymphoma       | Soft Tissue including Heart      | 37467          | 15                     | 0.6                               | 0.03                                  | 17.6                   | 0.85 (0.48 to 1.4)   | 61.5            | 78.1            |
| W   | Non-Hodgkin Lymphoma       | Stomach                          | 37467          | 61                     | 2.4                               | 0.10                                  | 48.8                   | 1.25 (0.96 to 1.61)  | 61.5            | 74.8            |
| W   | Non-Hodgkin Lymphoma       | Thyroid                          | 37467          | 97                     | 3.9                               | 0.16                                  | 66.5                   | 1.46 (1.18 to 1.78)  | 61.5            | 64.1            |
| W   | Non-Hodgkin Lymphoma       | Urinary Bladder                  | 37467          | 108                    | 4.3                               | 0.18                                  | 94.2                   | 1.15 (0.94 to 1.39)  | 61.5            | 75.0            |
| W   | Non-Hodgkin Lymphoma       | Vulva and Other Genital Organs   | 37467          | 40                     | 1.6                               | 0.07                                  | 39.6                   | 1.01 (0.72 to 1.38)  | 61.5            | 72.2            |
| W   | Oral Cavity and Pharynx    | Acute Non-Lymphocytic Leukemia   | 10788          | 9                      | 1.2                               | 0.02                                  | 8.1                    | 1.11 (0.51 to 2.11)  | 58.0            | 72.8            |
| W   | Oral Cavity and Pharynx    | Anus, Anal Canal and Anorectum   | 10788          | 9                      | 1.2                               | 0.02                                  | 4.1                    | 2.17 (0.99 to 4.12)  | 58.0            | 65.1            |
| W   | Oral Cavity and Pharynx    | Bones and Joints                 | 10788          | 9                      | 1.2                               | 0.02                                  | 0.8                    | 10.9 (4.98 to 20.69) | 58.0            | 64.0            |
| W   | Oral Cavity and Pharynx    | Brain and Other Nervous System   | 10788          | 5                      | 0.7                               | 0.01                                  | 8.8                    | 0.57 (0.18 to 1.33)  | 58.0            | 66.7            |
| W   | Oral Cavity and Pharynx    | Breast                           | 10788          | 227                    | 29.6                              | 0.38                                  | 260.0                  | 0.87 (0.76 to 0.99)  | 58.0            | 69.1            |
| W   | Oral Cavity and Pharynx    | Colon and Rectum                 | 10788          | 99                     | 12.9                              | 0.17                                  | 92.6                   | 1.07 (0.87 to 1.3)   | 58.0            | 73.4            |
| W   | Oral Cavity and Pharynx    | Corpus and Uterus, NOS           | 10788          | 51                     | 6.6                               | 0.09                                  | 57.4                   | 0.89 (0.66 to 1.17)  | 58.0            | 70.0            |
| W   | Oral Cavity and Pharynx    | Esophagus                        | 10788          | 58                     | 7.6                               | 0.10                                  | 4.8                    | 12 (9.11 to 15.51)   | 58.0            | 67.9            |
| W   | Oral Cavity and Pharynx    | Gallbladder and Other Biliary    | 10788          | 9                      | 1.2                               | 0.02                                  | 8.2                    | 1.1 (0.5 to 2.09)    | 58.0            | 77.5            |
| W   | Oral Cavity and Pharynx    | Kidney and Renal Pelvis          | 10788          | 20                     | 2.6                               | 0.03                                  | 22.3                   | 0.9 (0.55 to 1.39)   | 58.0            | 70.3            |
| W   | Oral Cavity and Pharynx    | Larynx                           | 10788          | 22                     | 2.9                               | 0.04                                  | 2.4                    | 9.34 (5.85 to 14.14) | 58.0            | 69.5            |
| W   | Oral Cavity and Pharynx    | Liver and Intrahepatic Bile Duct | 10788          | 14                     | 1.8                               | 0.02                                  | 11.6                   | 1.21 (0.66 to 2.03)  | 58.0            | 66.7            |
| W   | Oral Cavity and Pharynx    | Lung and Bronchus                | 10788          | 357                    | 46.5                              | 0.60                                  | 127.0                  | 2.81 (2.53 to 3.12)  | 58.0            | 71.7            |
| W   | Oral Cavity and Pharynx    | Melanoma of the Skin             | 10788          | 30                     | 3.9                               | 0.05                                  | 29.8                   | 1.01 (0.68 to 1.44)  | 58.0            | 69.7            |
| W   | Oral Cavity and Pharynx    | Myeloma                          | 10788          | 16                     | 2.1                               | 0.03                                  | 13.2                   | 1.21 (0.69 to 1.97)  | 58.0            | 75.6            |
| W   | Oral Cavity and Pharynx    | Non-Hodgkin Lymphoma             | 10788          | 57                     | 7.4                               | 0.10                                  | 49.1                   | 1.16 (0.88 to 1.5)   | 58.0            | 73.6            |
| W   | Oral Cavity and Pharynx    | Ovary                            | 10788          | 23                     | 3.0                               | 0.04                                  | 25.9                   | 0.89 (0.56 to 1.33)  | 58.0            | 71.2            |
| W   | Oral Cavity and Pharynx    | Pancreas                         | 10788          | 27                     | 3.5                               | 0.05                                  | 30.1                   | 0.9 (0.59 to 1.31)   | 58.0            | 70.0            |

| Sex | First Primary Cancer (FPC) | Subsequent Primary Cancer (SPC)  | Survivors, No. | Observed Number of SPC | Incidence per 10,000 Person-years | % Contribution to the Total Incidence | Expected Number of SPC | SIR (95% CI)        | Mean Age at FPC | Mean Age at SPC |
|-----|----------------------------|----------------------------------|----------------|------------------------|-----------------------------------|---------------------------------------|------------------------|---------------------|-----------------|-----------------|
| W   | Oral Cavity and Pharynx    | Small Intestine                  | 10788          | 6                      | 0.8                               | 0.01                                  | 4.3                    | 1.39 (0.51 to 3.03) | 58.0            | 68.4            |
| W   | Oral Cavity and Pharynx    | Soft Tissue including Heart      | 10788          | 12                     | 1.6                               | 0.02                                  | 4.8                    | 2.48 (1.28 to 4.34) | 58.0            | 69.0            |
| W   | Oral Cavity and Pharynx    | Stomach                          | 10788          | 19                     | 2.5                               | 0.03                                  | 13.5                   | 1.41 (0.85 to 2.2)  | 58.0            | 68.6            |
| W   | Oral Cavity and Pharynx    | Thyroid                          | 10788          | 19                     | 2.5                               | 0.03                                  | 20.9                   | 0.91 (0.55 to 1.42) | 58.0            | 58.2            |
| W   | Oral Cavity and Pharynx    | Urinary Bladder                  | 10788          | 30                     | 3.9                               | 0.05                                  | 23.8                   | 1.26 (0.85 to 1.8)  | 58.0            | 76.2            |
| W   | Oral Cavity and Pharynx    | Vulva and Other Genital Organs   | 10788          | 22                     | 2.9                               | 0.04                                  | 10.3                   | 2.14 (1.34 to 3.24) | 58.0            | 64.1            |
| W   | Ovary                      | Acute Lymphocytic Leukemia       | 18169          | 5                      | 0.4                               | 0.01                                  | 1.4                    | 3.51 (1.14 to 8.19) | 55.0            | 55.0            |
| W   | Ovary                      | Acute Non-Lymphocytic Leukemia   | 18169          | 46                     | 3.5                               | 0.08                                  | 12.3                   | 3.76 (2.75 to 5.01) | 55.0            | 65.0            |
| W   | Ovary                      | Brain and Other Nervous System   | 18169          | 12                     | 0.9                               | 0.02                                  | 14.3                   | 0.84 (0.44 to 1.47) | 55.0            | 67.1            |
| W   | Ovary                      | Breast                           | 18169          | 485                    | 37.0                              | 0.82                                  | 428.6                  | 1.13 (1.03 to 1.24) | 55.0            | 67.0            |
| W   | Ovary                      | Chronic Myeloid Leukemia         | 18169          | 10                     | 0.8                               | 0.02                                  | 4.4                    | 2.28 (1.09 to 4.19) | 55.0            | 68.0            |
| W   | Ovary                      | Colon and Rectum                 | 18169          | 162                    | 12.3                              | 0.27                                  | 136.5                  | 1.19 (1.01 to 1.39) | 55.0            | 70.4            |
| W   | Ovary                      | Gallbladder and Other Biliary    | 18169          | 5                      | 0.4                               | 0.01                                  | 12.1                   | 0.41 (0.13 to 0.96) | 55.0            | 69.6            |
| W   | Ovary                      | Kidney and Renal Pelvis          | 18169          | 37                     | 2.8                               | 0.06                                  | 35.3                   | 1.05 (0.74 to 1.44) | 55.0            | 66.7            |
| W   | Ovary                      | Liver and Intrahepatic Bile Duct | 18169          | 14                     | 1.1                               | 0.02                                  | 17.7                   | 0.79 (0.43 to 1.33) | 55.0            | 68.1            |
| W   | Ovary                      | Lung and Bronchus                | 18169          | 179                    | 13.6                              | 0.30                                  | 192.9                  | 0.93 (0.8 to 1.07)  | 55.0            | 69.8            |
| W   | Ovary                      | Melanoma of the Skin             | 18169          | 50                     | 3.8                               | 0.08                                  | 50.7                   | 0.99 (0.73 to 1.3)  | 55.0            | 65.6            |
| W   | Ovary                      | Myeloma                          | 18169          | 22                     | 1.7                               | 0.04                                  | 19.8                   | 1.11 (0.7 to 1.69)  | 55.0            | 72.8            |
| W   | Ovary                      | Non-Hodgkin Lymphoma             | 18169          | 66                     | 5.0                               | 0.11                                  | 75.6                   | 0.87 (0.68 to 1.11) | 55.0            | 70.3            |
| W   | Ovary                      | Oral Cavity and Pharynx          | 18169          | 25                     | 1.9                               | 0.04                                  | 22.1                   | 1.13 (0.73 to 1.67) | 55.0            | 68.2            |
| W   | Ovary                      | Pancreas                         | 18169          | 62                     | 4.7                               | 0.11                                  | 44.4                   | 1.4 (1.07 to 1.79)  | 55.0            | 74.2            |
| W   | Ovary                      | Small Intestine                  | 18169          | 12                     | 0.9                               | 0.02                                  | 6.7                    | 1.78 (0.92 to 3.12) | 55.0            | 69.8            |
| W   | Ovary                      | Soft Tissue including Heart      | 18169          | 10                     | 0.8                               | 0.02                                  | 7.7                    | 1.31 (0.63 to 2.4)  | 55.0            | 65.9            |
| W   | Ovary                      | Stomach                          | 18169          | 20                     | 1.5                               | 0.03                                  | 19.8                   | 1.01 (0.62 to 1.56) | 55.0            | 67.4            |
| W   | Ovary                      | Thyroid                          | 18169          | 49                     | 3.7                               | 0.08                                  | 37.4                   | 1.31 (0.97 to 1.73) | 55.0            | 61.3            |
| W   | Ovary                      | Urinary Bladder                  | 18169          | 45                     | 3.4                               | 0.08                                  | 35.4                   | 1.27 (0.93 to 1.7)  | 55.0            | 69.3            |
| W   | Pancreas                   | Breast                           | 1675           | 41                     | 46.6                              | 0.07                                  | 30.1                   | 1.36 (0.98 to 1.85) | 59.8            | 72.3            |
| W   | Pancreas                   | Colon and Rectum                 | 1675           | 14                     | 15.9                              | 0.02                                  | 11.2                   | 1.25 (0.68 to 2.09) | 59.8            | 67.9            |
| W   | Pancreas                   | Corpus and Uterus, NOS           | 1675           | 5                      | 5.7                               | 0.01                                  | 6.6                    | 0.76 (0.25 to 1.76) | 59.8            | 70.5            |
| W   | Pancreas                   | Kidney and Renal Pelvis          | 1675           | 7                      | 8.0                               | 0.01                                  | 2.7                    | 2.62 (1.05 to 5.4)  | 59.8            | 63.8            |
| W   | Pancreas                   | Lung and Bronchus                | 1675           | 34                     | 38.7                              | 0.06                                  | 15.3                   | 2.23 (1.54 to 3.12) | 59.8            | 69.7            |
| W   | Pancreas                   | Non-Hodgkin Lymphoma             | 1675           | 7                      | 8.0                               | 0.01                                  | 5.8                    | 1.21 (0.49 to 2.48) | 59.8            | 74.9            |

| Sex | First Primary Cancer (FPC)  | Subsequent Primary Cancer (SPC)  | Survivors, No. | Observed Number of SPC | Incidence per 10,000 Person-years | % Contribution to the Total Incidence | Expected Number of SPC | SIR (95% CI)          | Mean Age at FPC | Mean Age at SPC |
|-----|-----------------------------|----------------------------------|----------------|------------------------|-----------------------------------|---------------------------------------|------------------------|-----------------------|-----------------|-----------------|
| W   | Pancreas                    | Stomach                          | 1675           | 5                      | 5.7                               | 0.01                                  | 1.7                    | 2.9 (0.94 to 6.76)    | 59.8            | 72.9            |
| W   | Small Intestine             | Breast                           | 2506           | 68                     | 44.7                              | 0.12                                  | 55.6                   | 1.22 (0.95 to 1.55)   | 60.4            | 70.0            |
| W   | Small Intestine             | Colon and Rectum                 | 2506           | 22                     | 14.5                              | 0.04                                  | 20.4                   | 1.08 (0.68 to 1.63)   | 60.4            | 71.5            |
| W   | Small Intestine             | Kidney and Renal Pelvis          | 2506           | 8                      | 5.3                               | 0.01                                  | 5.0                    | 1.59 (0.68 to 3.12)   | 60.4            | 74.4            |
| W   | Small Intestine             | Liver and Intrahepatic Bile Duct | 2506           | 5                      | 3.3                               | 0.01                                  | 2.5                    | 2.01 (0.65 to 4.69)   | 60.4            | 71.5            |
| W   | Small Intestine             | Lung and Bronchus                | 2506           | 32                     | 21.0                              | 0.05                                  | 28.8                   | 1.11 (0.76 to 1.57)   | 60.4            | 76.1            |
| W   | Small Intestine             | Melanoma of the Skin             | 2506           | 8                      | 5.3                               | 0.01                                  | 6.4                    | 1.25 (0.54 to 2.47)   | 60.4            | 69.8            |
| W   | Small Intestine             | Non-Hodgkin Lymphoma             | 2506           | 14                     | 9.2                               | 0.02                                  | 10.8                   | 1.29 (0.71 to 2.17)   | 60.4            | 76.8            |
| W   | Small Intestine             | Ovary                            | 2506           | 5                      | 3.3                               | 0.01                                  | 5.5                    | 0.91 (0.3 to 2.12)    | 60.4            | 71.8            |
| W   | Small Intestine             | Pancreas                         | 2506           | 11                     | 7.2                               | 0.02                                  | 7.0                    | 1.58 (0.79 to 2.82)   | 60.4            | 68.1            |
| W   | Small Intestine             | Stomach                          | 2506           | 5                      | 3.3                               | 0.01                                  | 2.9                    | 1.72 (0.56 to 4)      | 60.4            | 69.6            |
| W   | Small Intestine             | Urinary Bladder                  | 2506           | 8                      | 5.3                               | 0.01                                  | 5.4                    | 1.48 (0.64 to 2.91)   | 60.4            | 77.7            |
| W   | Soft Tissue including Heart | Acute Non-Lymphocytic Leukemia   | 4243           | 10                     | 2.9                               | 0.02                                  | 3.0                    | 3.37 (1.62 to 6.2)    | 52.8            | 56.3            |
| W   | Soft Tissue including Heart | Anus, Anal Canal and Anorectum   | 4243           | 6                      | 1.8                               | 0.01                                  | 1.6                    | 3.67 (1.35 to 7.98)   | 52.8            | 67.6            |
| W   | Soft Tissue including Heart | Bones and Joints                 | 4243           | 5                      | 1.5                               | 0.01                                  | 0.3                    | 14.69 (4.77 to 34.28) | 52.8            | 56.9            |
| W   | Soft Tissue including Heart | Breast                           | 4243           | 105                    | 30.9                              | 0.18                                  | 101.3                  | 1.04 (0.85 to 1.26)   | 52.8            | 67.7            |
| W   | Soft Tissue including Heart | Colon and Rectum                 | 4243           | 31                     | 9.1                               | 0.05                                  | 33.2                   | 0.93 (0.63 to 1.32)   | 52.8            | 75.4            |
| W   | Soft Tissue including Heart | Corpus and Uterus, NOS           | 4243           | 18                     | 5.3                               | 0.03                                  | 22.3                   | 0.81 (0.48 to 1.28)   | 52.8            | 65.2            |
| W   | Soft Tissue including Heart | Kidney and Renal Pelvis          | 4243           | 12                     | 3.5                               | 0.02                                  | 8.5                    | 1.42 (0.73 to 2.48)   | 52.8            | 68.3            |
| W   | Soft Tissue including Heart | Lung and Bronchus                | 4243           | 45                     | 13.2                              | 0.08                                  | 45.1                   | 1 (0.73 to 1.33)      | 52.8            | 72.7            |
| W   | Soft Tissue including Heart | Melanoma of the Skin             | 4243           | 15                     | 4.4                               | 0.03                                  | 12.1                   | 1.24 (0.7 to 2.05)    | 52.8            | 71.4            |
| W   | Soft Tissue including Heart | Non-Hodgkin Lymphoma             | 4243           | 28                     | 8.2                               | 0.05                                  | 17.8                   | 1.57 (1.05 to 2.27)   | 52.8            | 72.6            |
| W   | Soft Tissue including Heart | Ovary                            | 4243           | 13                     | 3.8                               | 0.02                                  | 9.8                    | 1.33 (0.71 to 2.28)   | 52.8            | 71.1            |
| W   | Soft Tissue including Heart | Pancreas                         | 4243           | 13                     | 3.8                               | 0.02                                  | 10.9                   | 1.2 (0.64 to 2.05)    | 52.8            | 70.9            |
| W   | Soft Tissue including Heart | Thyroid                          | 4243           | 24                     | 7.1                               | 0.04                                  | 9.5                    | 2.52 (1.62 to 3.76)   | 52.8            | 59.4            |
| W   | Soft Tissue including Heart | Urinary Bladder                  | 4243           | 7                      | 2.1                               | 0.01                                  | 8.4                    | 0.84 (0.34 to 1.72)   | 52.8            | 67.2            |
| W   | Stomach                     | Breast                           | 4518           | 72                     | 26.0                              | 0.12                                  | 95.6                   | 0.75 (0.59 to 0.95)   | 63.8            | 73.2            |
| W   | Stomach                     | Colon and Rectum                 | 4518           | 59                     | 21.3                              | 0.10                                  | 42.6                   | 1.39 (1.06 to 1.79)   | 63.8            | 79.0            |
| W   | Stomach                     | Corpus and Uterus, NOS           | 4518           | 14                     | 5.0                               | 0.02                                  | 20.2                   | 0.69 (0.38 to 1.16)   | 63.8            | 69.0            |
| W   | Stomach                     | Esophagus                        | 4518           | 6                      | 2.2                               | 0.01                                  | 2.1                    | 2.85 (1.05 to 6.2)    | 63.8            | 72.9            |
| W   | Stomach                     | Gallbladder and Other Biliary    | 4518           | 5                      | 1.8                               | 0.01                                  | 4.1                    | 1.23 (0.4 to 2.87)    | 63.8            | 81.7            |
| W   | Stomach                     | Kidney and Renal Pelvis          | 4518           | 6                      | 2.2                               | 0.01                                  | 8.9                    | 0.67 (0.25 to 1.46)   | 63.8            | 76.6            |

| Sex | First Primary Cancer (FPC) | Subsequent Primary Cancer (SPC)  | Survivors, No. | Observed Number of SPC | Incidence per 10,000 Person-years | % Contribution to the Total Incidence | Expected Number of SPC | SIR (95% CI)        | Mean Age at FPC | Mean Age at SPC |
|-----|----------------------------|----------------------------------|----------------|------------------------|-----------------------------------|---------------------------------------|------------------------|---------------------|-----------------|-----------------|
| W   | Stomach                    | Liver and Intrahepatic Bile Duct | 4518           | 6                      | 2.2                               | 0.01                                  | 6.3                    | 0.95 (0.35 to 2.07) | 63.8            | 77.6            |
| W   | Stomach                    | Lung and Bronchus                | 4518           | 63                     | 22.7                              | 0.11                                  | 53.2                   | 1.18 (0.91 to 1.52) | 63.8            | 75.3            |
| W   | Stomach                    | Melanoma of the Skin             | 4518           | 6                      | 2.2                               | 0.01                                  | 9.2                    | 0.65 (0.24 to 1.42) | 63.8            | 83.8            |
| W   | Stomach                    | Myeloma                          | 4518           | 8                      | 2.9                               | 0.01                                  | 6.1                    | 1.32 (0.57 to 2.6)  | 63.8            | 75.7            |
| W   | Stomach                    | Non-Hodgkin Lymphoma             | 4518           | 21                     | 7.6                               | 0.04                                  | 20.0                   | 1.05 (0.65 to 1.61) | 63.8            | 73.6            |
| W   | Stomach                    | Ovary                            | 4518           | 8                      | 2.9                               | 0.01                                  | 9.8                    | 0.82 (0.35 to 1.61) | 63.8            | 70.0            |
| W   | Stomach                    | Pancreas                         | 4518           | 22                     | 7.9                               | 0.04                                  | 14.5                   | 1.52 (0.95 to 2.3)  | 63.8            | 73.7            |
| W   | Stomach                    | Thyroid                          | 4518           | 8                      | 2.9                               | 0.01                                  | 6.9                    | 1.17 (0.5 to 2.3)   | 63.8            | 74.6            |
| W   | Stomach                    | Urinary Bladder                  | 4518           | 5                      | 1.8                               | 0.01                                  | 10.2                   | 0.49 (0.16 to 1.14) | 63.8            | 75.3            |
| W   | Stomach                    | Vulva and Other Genital Organs   | 4518           | 9                      | 3.2                               | 0.02                                  | 4.1                    | 2.2 (1.01 to 4.17)  | 63.8            | 78.7            |
| W   | Thyroid                    | Acute Lymphocytic Leukemia       | 43436          | 10                     | 0.3                               | 0.02                                  | 3.3                    | 3.01 (1.44 to 5.53) | 46.4            | 59.4            |
| W   | Thyroid                    | Acute Non-Lymphocytic Leukemia   | 43436          | 36                     | 1.0                               | 0.06                                  | 21.6                   | 1.66 (1.17 to 2.3)  | 46.4            | 63.0            |
| W   | Thyroid                    | Anus, Anal Canal and Anorectum   | 43436          | 16                     | 0.5                               | 0.03                                  | 14.4                   | 1.11 (0.64 to 1.81) | 46.4            | 61.4            |
| W   | Thyroid                    | Bones and Joints                 | 43436          | 10                     | 0.3                               | 0.02                                  | 3.1                    | 3.24 (1.55 to 5.95) | 46.4            | 56.5            |
| W   | Thyroid                    | Brain and Other Nervous System   | 43436          | 30                     | 0.9                               | 0.05                                  | 28.4                   | 1.06 (0.71 to 1.51) | 46.4            | 61.2            |
| W   | Thyroid                    | Breast                           | 43436          | 1042                   | 29.6                              | 1.76                                  | 897.3                  | 1.16 (1.09 to 1.23) | 46.4            | 61.1            |
| W   | Thyroid                    | Cervix Uteri                     | 43436          | 27                     | 0.8                               | 0.05                                  | 41.0                   | 0.66 (0.43 to 0.96) | 46.4            | 52.1            |
| W   | Thyroid                    | Chronic Myeloid Leukemia         | 43436          | 16                     | 0.5                               | 0.03                                  | 8.2                    | 1.95 (1.12 to 3.17) | 46.4            | 54.5            |
| W   | Thyroid                    | Colon and Rectum                 | 43436          | 202                    | 5.7                               | 0.34                                  | 229.4                  | 0.88 (0.76 to 1.01) | 46.4            | 64.7            |
| W   | Thyroid                    | Corpus and Uterus, NOS           | 43436          | 201                    | 5.7                               | 0.34                                  | 200.4                  | 1 (0.87 to 1.15)    | 46.4            | 61.3            |
| W   | Thyroid                    | Esophagus                        | 43436          | 9                      | 0.3                               | 0.02                                  | 11.4                   | 0.79 (0.36 to 1.5)  | 46.4            | 72.1            |
| W   | Thyroid                    | Eye and Orbit                    | 43436          | 8                      | 0.2                               | 0.01                                  | 4.4                    | 1.81 (0.78 to 3.57) | 46.4            | 60.0            |
| W   | Thyroid                    | Gallbladder and Other Biliary    | 43436          | 19                     | 0.5                               | 0.03                                  | 20.0                   | 0.95 (0.57 to 1.48) | 46.4            | 67.8            |
| W   | Thyroid                    | Kidney and Renal Pelvis          | 43436          | 114                    | 3.2                               | 0.19                                  | 67.3                   | 1.69 (1.4 to 2.04)  | 46.4            | 64.7            |
| W   | Thyroid                    | Larynx                           | 43436          | 5                      | 0.1                               | 0.01                                  | 6.9                    | 0.72 (0.24 to 1.69) | 46.4            | 83.3            |
| W   | Thyroid                    | Liver and Intrahepatic Bile Duct | 43436          | 34                     | 1.0                               | 0.06                                  | 32.5                   | 1.05 (0.73 to 1.46) | 46.4            | 65.4            |
| W   | Thyroid                    | Lung and Bronchus                | 43436          | 285                    | 8.1                               | 0.48                                  | 306.3                  | 0.93 (0.83 to 1.05) | 46.4            | 68.9            |
| W   | Thyroid                    | Melanoma of the Skin             | 43436          | 121                    | 3.4                               | 0.20                                  | 113.9                  | 1.06 (0.88 to 1.27) | 46.4            | 61.0            |
| W   | Thyroid                    | Myeloma                          | 43436          | 53                     | 1.5                               | 0.09                                  | 34.3                   | 1.55 (1.16 to 2.02) | 46.4            | 70.5            |
| W   | Thyroid                    | Non-Hodgkin Lymphoma             | 43436          | 179                    | 5.1                               | 0.30                                  | 130.2                  | 1.38 (1.18 to 1.59) | 46.4            | 66.8            |
| W   | Thyroid                    | Oral Cavity and Pharynx          | 43436          | 58                     | 1.6                               | 0.10                                  | 41.9                   | 1.38 (1.05 to 1.79) | 46.4            | 58.8            |
| W   | Thyroid                    | Ovary                            | 43436          | 83                     | 2.4                               | 0.14                                  | 81.7                   | 1.02 (0.81 to 1.26) | 46.4            | 63.5            |

| Sex | First Primary Cancer (FPC)     | Subsequent Primary Cancer (SPC)  | Survivors, No. | Observed Number of SPC | Incidence per 10,000 Person-years | % Contribution to the Total Incidence | Expected Number of SPC | SIR (95% CI)         | Mean Age at FPC | Mean Age at SPC |
|-----|--------------------------------|----------------------------------|----------------|------------------------|-----------------------------------|---------------------------------------|------------------------|----------------------|-----------------|-----------------|
| W   | Thyroid                        | Pancreas                         | 43436          | 73                     | 2.1                               | 0.12                                  | 72.2                   | 1.01 (0.79 to 1.27)  | 46.4            | 68.7            |
| W   | Thyroid                        | Small Intestine                  | 43436          | 14                     | 0.4                               | 0.02                                  | 12.8                   | 1.09 (0.6 to 1.83)   | 46.4            | 66.2            |
| W   | Thyroid                        | Soft Tissue including Heart      | 43436          | 27                     | 0.8                               | 0.05                                  | 15.7                   | 1.72 (1.14 to 2.51)  | 46.4            | 60.9            |
| W   | Thyroid                        | Stomach                          | 43436          | 44                     | 1.3                               | 0.07                                  | 35.2                   | 1.25 (0.91 to 1.68)  | 46.4            | 65.8            |
| W   | Thyroid                        | Urinary Bladder                  | 43436          | 46                     | 1.3                               | 0.08                                  | 54.1                   | 0.85 (0.62 to 1.13)  | 46.4            | 71.2            |
| W   | Thyroid                        | Vulva and Other Genital Organs   | 43436          | 18                     | 0.5                               | 0.03                                  | 30.1                   | 0.6 (0.35 to 0.94)   | 46.4            | 63.1            |
| W   | Urinary Bladder                | Acute Non-Lymphocytic Leukemia   | 15717          | 18                     | 1.6                               | 0.03                                  | 16.7                   | 1.08 (0.64 to 1.7)   | 66.3            | 77.1            |
| W   | Urinary Bladder                | Anus, Anal Canal and Anorectum   | 15717          | 7                      | 0.6                               | 0.01                                  | 7.4                    | 0.95 (0.38 to 1.96)  | 66.3            | 62.6            |
| W   | Urinary Bladder                | Brain and Other Nervous System   | 15717          | 10                     | 0.9                               | 0.02                                  | 16.6                   | 0.6 (0.29 to 1.11)   | 66.3            | 76.0            |
| W   | Urinary Bladder                | Breast                           | 15717          | 435                    | 39.5                              | 0.74                                  | 441.1                  | 0.99 (0.9 to 1.08)   | 66.3            | 73.6            |
| W   | Urinary Bladder                | Cervix Uteri                     | 15717          | 13                     | 1.2                               | 0.02                                  | 11.6                   | 1.12 (0.6 to 1.92)   | 66.3            | 75.8            |
| W   | Urinary Bladder                | Colon and Rectum                 | 15717          | 168                    | 15.3                              | 0.28                                  | 191.4                  | 0.88 (0.75 to 1.02)  | 66.3            | 78.0            |
| W   | Urinary Bladder                | Corpus and Uterus, NOS           | 15717          | 81                     | 7.4                               | 0.14                                  | 92.8                   | 0.87 (0.69 to 1.09)  | 66.3            | 71.4            |
| W   | Urinary Bladder                | Esophagus                        | 15717          | 13                     | 1.2                               | 0.02                                  | 10.2                   | 1.28 (0.68 to 2.19)  | 66.3            | 77.4            |
| W   | Urinary Bladder                | Gallbladder and Other Biliary    | 15717          | 15                     | 1.4                               | 0.03                                  | 17.0                   | 0.88 (0.49 to 1.45)  | 66.3            | 79.5            |
| W   | Urinary Bladder                | Hodgkin Lymphoma                 | 15717          | 5                      | 0.5                               | 0.01                                  | 3.4                    | 1.48 (0.48 to 3.46)  | 66.3            | 71.9            |
| W   | Urinary Bladder                | Kidney and Renal Pelvis          | 15717          | 102                    | 9.3                               | 0.17                                  | 41.5                   | 2.46 (2 to 2.98)     | 66.3            | 73.2            |
| W   | Urinary Bladder                | Liver and Intrahepatic Bile Duct | 15717          | 24                     | 2.2                               | 0.04                                  | 21.0                   | 1.14 (0.73 to 1.7)   | 66.3            | 76.1            |
| W   | Urinary Bladder                | Lung and Bronchus                | 15717          | 615                    | 55.9                              | 1.04                                  | 261.3                  | 2.35 (2.17 to 2.55)  | 66.3            | 76.1            |
| W   | Urinary Bladder                | Melanoma of the Skin             | 15717          | 47                     | 4.3                               | 0.08                                  | 55.7                   | 0.84 (0.62 to 1.12)  | 66.3            | 74.2            |
| W   | Urinary Bladder                | Myeloma                          | 15717          | 23                     | 2.1                               | 0.04                                  | 25.8                   | 0.89 (0.57 to 1.34)  | 66.3            | 78.6            |
| W   | Urinary Bladder                | Non-Hodgkin Lymphoma             | 15717          | 99                     | 9.0                               | 0.17                                  | 101.2                  | 0.98 (0.8 to 1.19)   | 66.3            | 76.9            |
| W   | Urinary Bladder                | Oral Cavity and Pharynx          | 15717          | 33                     | 3.0                               | 0.06                                  | 26.5                   | 1.25 (0.86 to 1.75)  | 66.3            | 75.7            |
| W   | Urinary Bladder                | Ovary                            | 15717          | 40                     | 3.6                               | 0.07                                  | 47.2                   | 0.85 (0.61 to 1.15)  | 66.3            | 75.0            |
| W   | Urinary Bladder                | Pancreas                         | 15717          | 59                     | 5.4                               | 0.10                                  | 63.8                   | 0.93 (0.7 to 1.19)   | 66.3            | 79.0            |
| W   | Urinary Bladder                | Small Intestine                  | 15717          | 13                     | 1.2                               | 0.02                                  | 8.1                    | 1.61 (0.86 to 2.75)  | 66.3            | 77.5            |
| W   | Urinary Bladder                | Soft Tissue including Heart      | 15717          | 7                      | 0.6                               | 0.01                                  | 8.9                    | 0.79 (0.32 to 1.62)  | 66.3            | 77.7            |
| W   | Urinary Bladder                | Stomach                          | 15717          | 22                     | 2.0                               | 0.04                                  | 26.4                   | 0.83 (0.52 to 1.26)  | 66.3            | 77.3            |
| W   | Urinary Bladder                | Thyroid                          | 15717          | 40                     | 3.6                               | 0.07                                  | 26.5                   | 1.51 (1.08 to 2.06)  | 66.3            | 68.7            |
| W   | Urinary Bladder                | Vulva and Other Genital Organs   | 15717          | 30                     | 2.7                               | 0.05                                  | 20.6                   | 1.45 (0.98 to 2.07)  | 66.3            | 73.6            |
| W   | Vulva and Other Genital Organs | Acute Non-Lymphocytic Leukemia   | 6079           | 10                     | 2.3                               | 0.02                                  | 4.8                    | 2.07 (0.99 to 3.8)   | 58.9            | 67.5            |
| W   | Vulva and Other Genital Organs | Anus, Anal Canal and Anorectum   | 6079           | 21                     | 4.8                               | 0.04                                  | 2.5                    | 8.35 (5.17 to 12.76) | 58.9            | 70.6            |

| Sex | First Primary Cancer (FPC)     | Subsequent Primary Cancer (SPC)  | Survivors, No. | Observed Number of SPC | Incidence per 10,000 Person-years | % Contribution to the Total Incidence | Expected Number of SPC | SIR (95% CI)        | Mean Age at FPC | Mean Age at SPC |
|-----|--------------------------------|----------------------------------|----------------|------------------------|-----------------------------------|---------------------------------------|------------------------|---------------------|-----------------|-----------------|
| W   | Vulva and Other Genital Organs | Breast                           | 6079           | 144                    | 32.8                              | 0.24                                  | 150.8                  | 0.96 (0.81 to 1.12) | 58.9            | 71.1            |
| W   | Vulva and Other Genital Organs | Colon and Rectum                 | 6079           | 61                     | 13.9                              | 0.10                                  | 55.4                   | 1.1 (0.84 to 1.42)  | 58.9            | 71.9            |
| W   | Vulva and Other Genital Organs | Corpus and Uterus, NOS           | 6079           | 28                     | 6.4                               | 0.05                                  | 33.1                   | 0.85 (0.56 to 1.22) | 58.9            | 72.2            |
| W   | Vulva and Other Genital Organs | Gallbladder and Other Biliary    | 6079           | 5                      | 1.1                               | 0.01                                  | 4.8                    | 1.04 (0.34 to 2.42) | 58.9            | 80.1            |
| W   | Vulva and Other Genital Organs | Kidney and Renal Pelvis          | 6079           | 11                     | 2.5                               | 0.02                                  | 13.2                   | 0.84 (0.42 to 1.49) | 58.9            | 72.5            |
| W   | Vulva and Other Genital Organs | Liver and Intrahepatic Bile Duct | 6079           | 8                      | 1.8                               | 0.01                                  | 6.5                    | 1.23 (0.53 to 2.43) | 58.9            | 67.8            |
| W   | Vulva and Other Genital Organs | Lung and Bronchus                | 6079           | 144                    | 32.8                              | 0.24                                  | 74.9                   | 1.92 (1.62 to 2.26) | 58.9            | 70.4            |
| W   | Vulva and Other Genital Organs | Melanoma of the Skin             | 6079           | 19                     | 4.3                               | 0.03                                  | 18.3                   | 1.04 (0.63 to 1.62) | 58.9            | 68.8            |
| W   | Vulva and Other Genital Organs | Myeloma                          | 6079           | 13                     | 3.0                               | 0.02                                  | 7.9                    | 1.66 (0.88 to 2.83) | 58.9            | 71.6            |
| W   | Vulva and Other Genital Organs | Non-Hodgkin Lymphoma             | 6079           | 27                     | 6.2                               | 0.05                                  | 29.5                   | 0.92 (0.6 to 1.33)  | 58.9            | 74.3            |
| W   | Vulva and Other Genital Organs | Oral Cavity and Pharynx          | 6079           | 25                     | 5.7                               | 0.04                                  | 8.2                    | 3.03 (1.96 to 4.48) | 58.9            | 67.5            |
| W   | Vulva and Other Genital Organs | Ovary                            | 6079           | 9                      | 2.1                               | 0.02                                  | 15.2                   | 0.59 (0.27 to 1.13) | 58.9            | 69.5            |
| W   | Vulva and Other Genital Organs | Pancreas                         | 6079           | 14                     | 3.2                               | 0.02                                  | 18.1                   | 0.77 (0.42 to 1.3)  | 58.9            | 76.6            |
| W   | Vulva and Other Genital Organs | Soft Tissue including Heart      | 6079           | 7                      | 1.6                               | 0.01                                  | 2.9                    | 2.45 (0.98 to 5.04) | 58.9            | 66.3            |
| W   | Vulva and Other Genital Organs | Stomach                          | 6079           | 7                      | 1.6                               | 0.01                                  | 7.8                    | 0.9 (0.36 to 1.86)  | 58.9            | 76.2            |
| W   | Vulva and Other Genital Organs | Thyroid                          | 6079           | 11                     | 2.5                               | 0.02                                  | 11.8                   | 0.93 (0.47 to 1.67) | 58.9            | 64.7            |
| W   | Vulva and Other Genital Organs | Urinary Bladder                  | 6079           | 18                     | 4.1                               | 0.03                                  | 14.5                   | 1.24 (0.74 to 1.96) | 58.9            | 74.4            |



**eTable 7.** Risks of dying from a specific type of subsequent primary cancer among 5-year cancer survivors in 12 SEER registries: mortality, percent contribution to the total mortality, standardized mortality ratio by first primary cancer types and sex

| Sex | First Primary Cancer (FPC)     | Subsequent Primary Cancer (SPC) | Survivors, No. | Observed Number of SPC Deaths | Mortality per 10,000 person-years | % Contribution to the Total Mortality | Expected Number of SPC Deaths | SMR (95% CI)           | Mean Age at FPC | Mean Age at SPC Death |
|-----|--------------------------------|---------------------------------|----------------|-------------------------------|-----------------------------------|---------------------------------------|-------------------------------|------------------------|-----------------|-----------------------|
| M   | Acute Lymphocytic Leukemia     | Non-Hodgkin Lymphoma            | 608            | 8                             | 17.2                              | 0.02                                  | 0.4                           | 19.74 (8.52 to 38.89)  | 38.7            | 74.5                  |
| M   | Acute Non-Lymphocytic Leukemia | Colon and Rectum                | 1900           | 5                             | 3.6                               | 0.01                                  | 4.5                           | 1.1 (0.36 to 2.57)     | 47.6            | 62.1                  |
| M   | Acute Non-Lymphocytic Leukemia | Lung and Bronchus               | 1900           | 9                             | 6.4                               | 0.02                                  | 15.2                          | 0.59 (0.27 to 1.12)    | 47.6            | 64.0                  |
| M   | Acute Non-Lymphocytic Leukemia | Non-Hodgkin Lymphoma            | 1900           | 9                             | 6.4                               | 0.02                                  | 2.3                           | 3.95 (1.81 to 7.5)     | 47.6            | 72.0                  |
| M   | Acute Non-Lymphocytic Leukemia | Urinary Bladder                 | 1900           | 8                             | 5.7                               | 0.02                                  | 1.6                           | 4.91 (2.12 to 9.67)    | 47.6            | 71.8                  |
| M   | Anus, Anal Canal and Anorectum | Colon and Rectum                | 1945           | 78                            | 58.8                              | 0.18                                  | 7.7                           | 10.18 (8.04 to 12.7)   | 55.8            | 67.9                  |
| M   | Anus, Anal Canal and Anorectum | Esophagus                       | 1945           | 5                             | 3.8                               | 0.01                                  | 3.2                           | 1.58 (0.51 to 3.69)    | 55.8            | 69.1                  |
| M   | Anus, Anal Canal and Anorectum | Lung and Bronchus               | 1945           | 44                            | 33.2                              | 0.10                                  | 25.7                          | 1.71 (1.24 to 2.3)     | 55.8            | 67.9                  |
| M   | Anus, Anal Canal and Anorectum | Non-Hodgkin Lymphoma            | 1945           | 7                             | 5.3                               | 0.02                                  | 4.0                           | 1.73 (0.7 to 3.56)     | 55.8            | 79.5                  |
| M   | Anus, Anal Canal and Anorectum | Oral Cavity and Pharynx         | 1945           | 6                             | 4.5                               | 0.01                                  | 1.6                           | 3.7 (1.36 to 8.05)     | 55.8            | 60.5                  |
| M   | Anus, Anal Canal and Anorectum | Pancreas                        | 1945           | 7                             | 5.3                               | 0.02                                  | 5.4                           | 1.29 (0.52 to 2.66)    | 55.8            | 63.6                  |
| M   | Anus, Anal Canal and Anorectum | Prostate                        | 1945           | 5                             | 3.8                               | 0.01                                  | 8.9                           | 0.56 (0.18 to 1.31)    | 55.8            | 83.1                  |
| M   | Anus, Anal Canal and Anorectum | Soft Tissue including Heart     | 1945           | 5                             | 3.8                               | 0.01                                  | 0.5                           | 9.47 (3.07 to 22.09)   | 55.8            | 75.4                  |
| M   | Anus, Anal Canal and Anorectum | Urinary Bladder                 | 1945           | 7                             | 5.3                               | 0.02                                  | 3.2                           | 2.21 (0.89 to 4.56)    | 55.8            | 74.2                  |
| M   | Bones and Joints               | Acute Non-lymphocytic Leukemia  | 1382           | 5                             | 4.3                               | 0.01                                  | 0.9                           | 5.85 (1.9 to 13.65)    | 44.5            | 69.9                  |
| M   | Bones and Joints               | Brain and Other Nervous System  | 1382           | 15                            | 12.9                              | 0.03                                  | 1.1                           | 14.02 (7.85 to 23.12)  | 44.5            | 58.7                  |
| M   | Bones and Joints               | Colon and Rectum                | 1382           | 5                             | 4.3                               | 0.01                                  | 3.7                           | 1.34 (0.44 to 3.14)    | 44.5            | 73.7                  |
| M   | Bones and Joints               | Lung and Bronchus               | 1382           | 26                            | 22.3                              | 0.06                                  | 12.2                          | 2.14 (1.4 to 3.13)     | 44.5            | 66.4                  |
| M   | Bones and Joints               | Pancreas                        | 1382           | 5                             | 4.3                               | 0.01                                  | 2.6                           | 1.92 (0.62 to 4.49)    | 44.5            | 67.3                  |
| M   | Bones and Joints               | Soft Tissue including Heart     | 1382           | 14                            | 12.0                              | 0.03                                  | 0.3                           | 49.61 (27.12 to 83.24) | 44.5            | 56.4                  |
| M   | Brain and Other Nervous System | Acute Non-lymphocytic Leukemia  | 4776           | 8                             | 2.3                               | 0.02                                  | 1.7                           | 4.69 (2.03 to 9.25)    | 42.1            | 56.3                  |
| M   | Brain and Other Nervous System | Colon and Rectum                | 4776           | 8                             | 2.3                               | 0.02                                  | 7.7                           | 1.04 (0.45 to 2.05)    | 42.1            | 62.8                  |
| M   | Brain and Other Nervous System | Esophagus                       | 4776           | 6                             | 1.8                               | 0.01                                  | 3.5                           | 1.7 (0.62 to 3.7)      | 42.1            | 58.5                  |
| M   | Brain and Other Nervous System | Kidney and Renal Pelvis         | 4776           | 5                             | 1.5                               | 0.01                                  | 2.5                           | 1.97 (0.64 to 4.6)     | 42.1            | 59.9                  |
| M   | Brain and Other Nervous System | Lung and Bronchus               | 4776           | 16                            | 4.7                               | 0.04                                  | 24.7                          | 0.65 (0.37 to 1.05)    | 42.1            | 68.3                  |
| M   | Brain and Other Nervous System | Melanoma of the Skin            | 4776           | 7                             | 2.1                               | 0.02                                  | 1.8                           | 3.96 (1.59 to 8.16)    | 42.1            | 60.6                  |
| M   | Brain and Other Nervous System | Non-Hodgkin Lymphoma            | 4776           | 7                             | 2.1                               | 0.02                                  | 3.7                           | 1.9 (0.77 to 3.92)     | 42.1            | 69.0                  |
| M   | Brain and Other Nervous System | Pancreas                        | 4776           | 7                             | 2.1                               | 0.02                                  | 5.5                           | 1.27 (0.51 to 2.62)    | 42.1            | 60.8                  |
| M   | Brain and Other Nervous System | Prostate                        | 4776           | 5                             | 1.5                               | 0.01                                  | 5.8                           | 0.86 (0.28 to 2)       | 42.1            | 77.4                  |

| Sex | First Primary Cancer (FPC)     | Subsequent Primary Cancer (SPC)  | Survivors, No. | Observed Number of SPC Deaths | Mortality per 10,000 person-years | % Contribution to the Total Mortality | Expected Number of SPC Deaths | SMR (95% CI)          | Mean Age at FPC | Mean Age at SPC Death |
|-----|--------------------------------|----------------------------------|----------------|-------------------------------|-----------------------------------|---------------------------------------|-------------------------------|-----------------------|-----------------|-----------------------|
| M   | Brain and Other Nervous System | Soft Tissue including Heart      | 4776           | 10                            | 2.9                               | 0.02                                  | 0.6                           | 15.43 (7.4 to 28.38)  | 42.1            | 54.5                  |
| M   | Breast                         | Acute Non-lymphocytic Leukemia   | 1861           | 5                             | 4.2                               | 0.01                                  | 2.5                           | 1.99 (0.65 to 4.64)   | 63.2            | 73.2                  |
| M   | Breast                         | Brain and Other Nervous System   | 1861           | 6                             | 5.0                               | 0.01                                  | 2.2                           | 2.73 (1 to 5.93)      | 63.2            | 75.9                  |
| M   | Breast                         | Colon and Rectum                 | 1861           | 13                            | 10.8                              | 0.03                                  | 10.6                          | 1.23 (0.65 to 2.1)    | 63.2            | 79.4                  |
| M   | Breast                         | Liver and Intrahepatic Bile Duct | 1861           | 5                             | 4.2                               | 0.01                                  | 4.4                           | 1.13 (0.37 to 2.64)   | 63.2            | 74.4                  |
| M   | Breast                         | Lung and Bronchus                | 1861           | 34                            | 28.3                              | 0.08                                  | 34.4                          | 0.99 (0.69 to 1.38)   | 63.2            | 75.3                  |
| M   | Breast                         | Non-Hodgkin Lymphoma             | 1861           | 11                            | 9.2                               | 0.03                                  | 5.9                           | 1.86 (0.93 to 3.32)   | 63.2            | 80.3                  |
| M   | Breast                         | Pancreas                         | 1861           | 19                            | 15.8                              | 0.04                                  | 7.1                           | 2.69 (1.62 to 4.2)    | 63.2            | 76.5                  |
| M   | Breast                         | Prostate                         | 1861           | 15                            | 12.5                              | 0.03                                  | 14.9                          | 1.01 (0.56 to 1.66)   | 63.2            | 75.4                  |
| M   | Breast                         | Stomach                          | 1861           | 5                             | 4.2                               | 0.01                                  | 2.7                           | 1.89 (0.61 to 4.4)    | 63.2            | 83.5                  |
| M   | Chronic Myeloid Leukemia       | Acute Lymphocytic Leukemia       | 2726           | 5                             | 2.9                               | 0.01                                  | 0.1                           | 38.7 (12.57 to 90.32) | 51.7            | 48.2                  |
| M   | Chronic Myeloid Leukemia       | Colon and Rectum                 | 2726           | 7                             | 4.1                               | 0.02                                  | 6.9                           | 1.02 (0.41 to 2.1)    | 51.7            | 71.0                  |
| M   | Chronic Myeloid Leukemia       | Lung and Bronchus                | 2726           | 13                            | 7.6                               | 0.03                                  | 22.5                          | 0.58 (0.31 to 0.99)   | 51.7            | 72.7                  |
| M   | Chronic Myeloid Leukemia       | Non-Hodgkin Lymphoma             | 2726           | 11                            | 6.4                               | 0.03                                  | 3.5                           | 3.14 (1.57 to 5.62)   | 51.7            | 72.4                  |
| M   | Chronic Myeloid Leukemia       | Prostate                         | 2726           | 6                             | 3.5                               | 0.01                                  | 7.4                           | 0.81 (0.3 to 1.77)    | 51.7            | 79.1                  |
| M   | Colon and Rectum               | Acute Lymphocytic Leukemia       | 74184          | 14                            | 0.3                               | 0.03                                  | 6.4                           | 2.17 (1.19 to 3.64)   | 63.4            | 68.1                  |
| M   | Colon and Rectum               | Acute Non-lymphocytic Leukemia   | 74184          | 156                           | 3.1                               | 0.35                                  | 108.8                         | 1.43 (1.22 to 1.68)   | 63.4            | 76.7                  |
| M   | Colon and Rectum               | Brain and Other Nervous System   | 74184          | 101                           | 2.0                               | 0.23                                  | 91.9                          | 1.1 (0.9 to 1.34)     | 63.4            | 72.8                  |
| M   | Colon and Rectum               | Breast                           | 74184          | 6                             | 0.1                               | 0.01                                  | 6.9                           | 0.87 (0.32 to 1.89)   | 63.4            | 76.5                  |
| M   | Colon and Rectum               | Chronic Myeloid Leukemia         | 74184          | 16                            | 0.3                               | 0.04                                  | 10.9                          | 1.47 (0.84 to 2.38)   | 63.4            | 78.5                  |
| M   | Colon and Rectum               | Esophagus                        | 74184          | 165                           | 3.3                               | 0.38                                  | 163.1                         | 1.01 (0.86 to 1.18)   | 63.4            | 76.7                  |
| M   | Colon and Rectum               | Gallbladder and Other Biliary    | 74184          | 33                            | 0.7                               | 0.08                                  | 27.1                          | 1.22 (0.84 to 1.71)   | 63.4            | 76.8                  |
| M   | Colon and Rectum               | Hodgkin Lymphoma                 | 74184          | 7                             | 0.1                               | 0.02                                  | 8.0                           | 0.88 (0.35 to 1.81)   | 63.4            | 72.7                  |
| M   | Colon and Rectum               | Kidney and Renal Pelvis          | 74184          | 130                           | 2.6                               | 0.30                                  | 131.2                         | 0.99 (0.83 to 1.18)   | 63.4            | 77.3                  |
| M   | Colon and Rectum               | Larynx                           | 74184          | 37                            | 0.7                               | 0.08                                  | 44.2                          | 0.84 (0.59 to 1.15)   | 63.4            | 76.1                  |
| M   | Colon and Rectum               | Liver and Intrahepatic Bile Duct | 74184          | 268                           | 5.3                               | 0.61                                  | 194.8                         | 1.38 (1.22 to 1.55)   | 63.4            | 73.8                  |
| M   | Colon and Rectum               | Lung and Bronchus                | 74184          | 1597                          | 31.5                              | 3.63                                  | 1472.0                        | 1.09 (1.03 to 1.14)   | 63.4            | 76.9                  |
| M   | Colon and Rectum               | Melanoma of the Skin             | 74184          | 66                            | 1.3                               | 0.15                                  | 81.5                          | 0.81 (0.63 to 1.03)   | 63.4            | 77.4                  |
| M   | Colon and Rectum               | Myeloma                          | 74184          | 132                           | 2.6                               | 0.30                                  | 111.8                         | 1.18 (0.99 to 1.4)    | 63.4            | 77.9                  |
| M   | Colon and Rectum               | Non-Hodgkin Lymphoma             | 74184          | 245                           | 4.8                               | 0.56                                  | 257.7                         | 0.95 (0.84 to 1.08)   | 63.4            | 79.3                  |
| M   | Colon and Rectum               | Oral Cavity and Pharynx          | 74184          | 85                            | 1.7                               | 0.19                                  | 80.4                          | 1.06 (0.84 to 1.31)   | 63.4            | 75.4                  |
| M   | Colon and Rectum               | Pancreas                         | 74184          | 412                           | 8.1                               | 0.94                                  | 301.6                         | 1.37 (1.24 to 1.51)   | 63.4            | 75.9                  |

| Sex | First Primary Cancer (FPC)    | Subsequent Primary Cancer (SPC)  | Survivors, No. | Observed Number of SPC Deaths | Mortality per 10,000 person-years | % Contribution to the Total Mortality | Expected Number of SPC Deaths | SMR (95% CI)           | Mean Age at FPC | Mean Age at SPC Death |
|-----|-------------------------------|----------------------------------|----------------|-------------------------------|-----------------------------------|---------------------------------------|-------------------------------|------------------------|-----------------|-----------------------|
| M   | Colon and Rectum              | Penis and Other Genital Organs   | 74184          | 7                             | 0.1                               | 0.02                                  | 5.2                           | 1.36 (0.55 to 2.8)     | 63.4            | 78.2                  |
| M   | Colon and Rectum              | Prostate                         | 74184          | 466                           | 9.2                               | 1.06                                  | 662.1                         | 0.7 (0.64 to 0.77)     | 63.4            | 81.1                  |
| M   | Colon and Rectum              | Small Intestine                  | 74184          | 41                            | 0.8                               | 0.09                                  | 11.0                          | 3.73 (2.68 to 5.06)    | 63.4            | 70.8                  |
| M   | Colon and Rectum              | Soft Tissue including Heart      | 74184          | 51                            | 1.0                               | 0.12                                  | 29.0                          | 1.76 (1.31 to 2.32)    | 63.4            | 78.0                  |
| M   | Colon and Rectum              | Stomach                          | 74184          | 180                           | 3.5                               | 0.41                                  | 121.4                         | 1.48 (1.27 to 1.72)    | 63.4            | 75.9                  |
| M   | Colon and Rectum              | Thyroid                          | 74184          | 10                            | 0.2                               | 0.02                                  | 12.3                          | 0.81 (0.39 to 1.5)     | 63.4            | 80.3                  |
| M   | Colon and Rectum              | Urinary Bladder                  | 74184          | 210                           | 4.1                               | 0.48                                  | 213.1                         | 0.99 (0.86 to 1.13)    | 63.4            | 79.7                  |
| M   | Esophagus                     | Brain and Other Nervous System   | 2736           | 6                             | 4.0                               | 0.01                                  | 2.8                           | 2.15 (0.79 to 4.69)    | 62.8            | 71.8                  |
| M   | Esophagus                     | Colon and Rectum                 | 2736           | 14                            | 9.2                               | 0.03                                  | 11.9                          | 1.18 (0.64 to 1.97)    | 62.8            | 75.5                  |
| M   | Esophagus                     | Lung and Bronchus                | 2736           | 82                            | 54.1                              | 0.19                                  | 40.6                          | 2.02 (1.61 to 2.51)    | 62.8            | 71.2                  |
| M   | Esophagus                     | Non-Hodgkin Lymphoma             | 2736           | 6                             | 4.0                               | 0.01                                  | 6.7                           | 0.89 (0.33 to 1.94)    | 62.8            | 82.2                  |
| M   | Esophagus                     | Oral Cavity and Pharynx          | 2736           | 18                            | 11.9                              | 0.04                                  | 2.3                           | 7.79 (4.61 to 12.3)    | 62.8            | 68.9                  |
| M   | Esophagus                     | Pancreas                         | 2736           | 12                            | 7.9                               | 0.03                                  | 8.4                           | 1.42 (0.74 to 2.48)    | 62.8            | 71.5                  |
| M   | Esophagus                     | Prostate                         | 2736           | 13                            | 8.6                               | 0.03                                  | 15.4                          | 0.84 (0.45 to 1.44)    | 62.8            | 78.7                  |
| M   | Esophagus                     | Stomach                          | 2736           | 21                            | 13.9                              | 0.05                                  | 3.0                           | 7.04 (4.36 to 10.76)   | 62.8            | 71.4                  |
| M   | Esophagus                     | Urinary Bladder                  | 2736           | 6                             | 4.0                               | 0.01                                  | 5.5                           | 1.1 (0.4 to 2.39)      | 62.8            | 78.0                  |
| M   | Eye and Orbit                 | Colon and Rectum                 | 1609           | 9                             | 7.7                               | 0.02                                  | 7.7                           | 1.18 (0.54 to 2.23)    | 58.1            | 77.7                  |
| M   | Eye and Orbit                 | Liver and Intrahepatic Bile Duct | 1609           | 14                            | 12.0                              | 0.03                                  | 3.3                           | 4.24 (2.32 to 7.12)    | 58.1            | 66.8                  |
| M   | Eye and Orbit                 | Lung and Bronchus                | 1609           | 40                            | 34.3                              | 0.09                                  | 25.5                          | 1.57 (1.12 to 2.14)    | 58.1            | 73.8                  |
| M   | Eye and Orbit                 | Melanoma of the Skin             | 1609           | 99                            | 84.8                              | 0.23                                  | 1.7                           | 60 (48.77 to 73.05)    | 58.1            | 66.5                  |
| M   | Eye and Orbit                 | Pancreas                         | 1609           | 9                             | 7.7                               | 0.02                                  | 5.3                           | 1.7 (0.78 to 3.22)     | 58.1            | 73.3                  |
| M   | Eye and Orbit                 | Prostate                         | 1609           | 9                             | 7.7                               | 0.02                                  | 9.6                           | 0.94 (0.43 to 1.78)    | 58.1            | 81.8                  |
| M   | Gallbladder and Other Biliary | Colon and Rectum                 | 1005           | 9                             | 15.6                              | 0.02                                  | 4.7                           | 1.94 (0.89 to 3.67)    | 62.6            | 74.0                  |
| M   | Gallbladder and Other Biliary | Liver and Intrahepatic Bile Duct | 1005           | 60                            | 103.7                             | 0.14                                  | 2.2                           | 27.8 (21.21 to 35.78)  | 62.6            | 68.5                  |
| M   | Gallbladder and Other Biliary | Lung and Bronchus                | 1005           | 18                            | 31.1                              | 0.04                                  | 15.0                          | 1.2 (0.71 to 1.9)      | 62.6            | 72.4                  |
| M   | Gallbladder and Other Biliary | Pancreas                         | 1005           | 63                            | 108.9                             | 0.14                                  | 3.1                           | 20.22 (15.54 to 25.87) | 62.6            | 72.1                  |
| M   | Hodgkin Lymphoma              | Acute Non-lymphocytic Leukemia   | 7211           | 16                            | 2.5                               | 0.04                                  | 3.0                           | 5.38 (3.08 to 8.74)    | 40.2            | 54.6                  |
| M   | Hodgkin Lymphoma              | Colon and Rectum                 | 7211           | 21                            | 3.3                               | 0.05                                  | 13.6                          | 1.55 (0.96 to 2.37)    | 40.2            | 65.5                  |
| M   | Hodgkin Lymphoma              | Esophagus                        | 7211           | 8                             | 1.2                               | 0.02                                  | 6.0                           | 1.34 (0.58 to 2.64)    | 40.2            | 66.4                  |
| M   | Hodgkin Lymphoma              | Liver and Intrahepatic Bile Duct | 7211           | 5                             | 0.8                               | 0.01                                  | 7.5                           | 0.67 (0.22 to 1.55)    | 40.2            | 59.9                  |
| M   | Hodgkin Lymphoma              | Lung and Bronchus                | 7211           | 90                            | 13.9                              | 0.20                                  | 42.5                          | 2.12 (1.71 to 2.61)    | 40.2            | 65.3                  |
| M   | Hodgkin Lymphoma              | Melanoma of the Skin             | 7211           | 5                             | 0.8                               | 0.01                                  | 3.0                           | 1.67 (0.54 to 3.89)    | 40.2            | 65.9                  |

| Sex | First Primary Cancer (FPC) | Subsequent Primary Cancer (SPC)  | Survivors, No. | Observed Number of SPC Deaths | Mortality per 10,000 person-years | % Contribution to the Total Mortality | Expected Number of SPC Deaths | SMR (95% CI)            | Mean Age at FPC | Mean Age at SPC Death |
|-----|----------------------------|----------------------------------|----------------|-------------------------------|-----------------------------------|---------------------------------------|-------------------------------|-------------------------|-----------------|-----------------------|
| M   | Hodgkin Lymphoma           | Non-Hodgkin Lymphoma             | 7211           | 128                           | 19.8                              | 0.29                                  | 6.4                           | 19.89 (16.59 to 23.65)  | 40.2            | 62.2                  |
| M   | Hodgkin Lymphoma           | Oral Cavity and Pharynx          | 7211           | 10                            | 1.5                               | 0.02                                  | 3.3                           | 3.02 (1.45 to 5.55)     | 40.2            | 58.7                  |
| M   | Hodgkin Lymphoma           | Pancreas                         | 7211           | 15                            | 2.3                               | 0.03                                  | 9.5                           | 1.58 (0.88 to 2.61)     | 40.2            | 68.4                  |
| M   | Hodgkin Lymphoma           | Prostate                         | 7211           | 14                            | 2.2                               | 0.03                                  | 11.1                          | 1.26 (0.69 to 2.12)     | 40.2            | 70.3                  |
| M   | Hodgkin Lymphoma           | Stomach                          | 7211           | 8                             | 1.2                               | 0.02                                  | 3.4                           | 2.38 (1.03 to 4.68)     | 40.2            | 67.5                  |
| M   | Kaposi Sarcoma             | Anus, Anal Canal and Anorectum   | 3836           | 14                            | 4.1                               | 0.03                                  | 0.1                           | 107.5 (58.77 to 180.37) | 43.5            | 55.7                  |
| M   | Kaposi Sarcoma             | Colon and Rectum                 | 3836           | 11                            | 3.2                               | 0.03                                  | 9.3                           | 1.19 (0.59 to 2.12)     | 43.5            | 52.6                  |
| M   | Kaposi Sarcoma             | Gallbladder and Other Biliary    | 3836           | 5                             | 1.4                               | 0.01                                  | 0.5                           | 11 (3.57 to 25.68)      | 43.5            | 61.6                  |
| M   | Kaposi Sarcoma             | Liver and Intrahepatic Bile Duct | 3836           | 16                            | 4.6                               | 0.04                                  | 5.3                           | 3.04 (1.74 to 4.94)     | 43.5            | 54.2                  |
| M   | Kaposi Sarcoma             | Lung and Bronchus                | 3836           | 14                            | 4.1                               | 0.03                                  | 28.0                          | 0.5 (0.27 to 0.84)      | 43.5            | 63.2                  |
| M   | Kaposi Sarcoma             | Melanoma of the Skin             | 3836           | 5                             | 1.4                               | 0.01                                  | 1.9                           | 2.61 (0.85 to 6.08)     | 43.5            | 58.4                  |
| M   | Kaposi Sarcoma             | Non-Hodgkin Lymphoma             | 3836           | 9                             | 2.6                               | 0.02                                  | 4.4                           | 2.05 (0.94 to 3.9)      | 43.5            | 58.7                  |
| M   | Kaposi Sarcoma             | Oral Cavity and Pharynx          | 3836           | 6                             | 1.7                               | 0.01                                  | 2.3                           | 2.65 (0.97 to 5.76)     | 43.5            | 52.3                  |
| M   | Kaposi Sarcoma             | Pancreas                         | 3836           | 10                            | 2.9                               | 0.02                                  | 6.3                           | 1.58 (0.76 to 2.91)     | 43.5            | 56.4                  |
| M   | Kaposi Sarcoma             | Prostate                         | 3836           | 10                            | 2.9                               | 0.02                                  | 8.2                           | 1.22 (0.58 to 2.24)     | 43.5            | 70.5                  |
| M   | Kidney and Renal Pelvis    | Acute Lymphocytic Leukemia       | 25791          | 5                             | 0.3                               | 0.01                                  | 1.8                           | 2.77 (0.9 to 6.46)      | 59.5            | 68.5                  |
| M   | Kidney and Renal Pelvis    | Acute Non-lymphocytic Leukemia   | 25791          | 36                            | 2.2                               | 0.08                                  | 27.9                          | 1.29 (0.9 to 1.79)      | 59.5            | 73.4                  |
| M   | Kidney and Renal Pelvis    | Bones and Joints                 | 25791          | 5                             | 0.3                               | 0.01                                  | 2.2                           | 2.24 (0.73 to 5.23)     | 59.5            | 65.4                  |
| M   | Kidney and Renal Pelvis    | Brain and Other Nervous System   | 25791          | 49                            | 2.9                               | 0.11                                  | 27.3                          | 1.79 (1.33 to 2.37)     | 59.5            | 72.8                  |
| M   | Kidney and Renal Pelvis    | Colon and Rectum                 | 25791          | 97                            | 5.8                               | 0.22                                  | 116.2                         | 0.83 (0.68 to 1.02)     | 59.5            | 73.4                  |
| M   | Kidney and Renal Pelvis    | Esophagus                        | 25791          | 43                            | 2.6                               | 0.10                                  | 46.2                          | 0.93 (0.67 to 1.25)     | 59.5            | 74.0                  |
| M   | Kidney and Renal Pelvis    | Gallbladder and Other Biliary    | 25791          | 12                            | 0.7                               | 0.03                                  | 6.7                           | 1.8 (0.93 to 3.14)      | 59.5            | 72.2                  |
| M   | Kidney and Renal Pelvis    | Larynx                           | 25791          | 7                             | 0.4                               | 0.02                                  | 12.3                          | 0.57 (0.23 to 1.18)     | 59.5            | 74.5                  |
| M   | Kidney and Renal Pelvis    | Liver and Intrahepatic Bile Duct | 25791          | 81                            | 4.8                               | 0.18                                  | 55.3                          | 1.47 (1.16 to 1.82)     | 59.5            | 68.9                  |
| M   | Kidney and Renal Pelvis    | Lung and Bronchus                | 25791          | 416                           | 24.9                              | 0.95                                  | 389.0                         | 1.07 (0.97 to 1.18)     | 59.5            | 74.8                  |
| M   | Kidney and Renal Pelvis    | Melanoma of the Skin             | 25791          | 13                            | 0.8                               | 0.03                                  | 22.1                          | 0.59 (0.31 to 1.01)     | 59.5            | 73.7                  |
| M   | Kidney and Renal Pelvis    | Myeloma                          | 25791          | 31                            | 1.9                               | 0.07                                  | 28.7                          | 1.08 (0.73 to 1.53)     | 59.5            | 77.9                  |
| M   | Kidney and Renal Pelvis    | Non-Hodgkin Lymphoma             | 25791          | 64                            | 3.8                               | 0.15                                  | 63.4                          | 1.01 (0.78 to 1.29)     | 59.5            | 76.6                  |
| M   | Kidney and Renal Pelvis    | Oral Cavity and Pharynx          | 25791          | 13                            | 0.8                               | 0.03                                  | 23.1                          | 0.56 (0.3 to 0.96)      | 59.5            | 69.6                  |
| M   | Kidney and Renal Pelvis    | Pancreas                         | 25791          | 104                           | 6.2                               | 0.24                                  | 81.8                          | 1.27 (1.04 to 1.54)     | 59.5            | 75.0                  |
| M   | Kidney and Renal Pelvis    | Prostate                         | 25791          | 103                           | 6.2                               | 0.23                                  | 147.9                         | 0.7 (0.57 to 0.85)      | 59.5            | 78.8                  |
| M   | Kidney and Renal Pelvis    | Small Intestine                  | 25791          | 5                             | 0.3                               | 0.01                                  | 2.9                           | 1.7 (0.55 to 3.96)      | 59.5            | 76.2                  |

| Sex | First Primary Cancer (FPC)       | Subsequent Primary Cancer (SPC)  | Survivors, No. | Observed Number of SPC Deaths | Mortality per 10,000 person-years | % Contribution to the Total Mortality | Expected Number of SPC Deaths | SMR (95% CI)          | Mean Age at FPC | Mean Age at SPC Death |
|-----|----------------------------------|----------------------------------|----------------|-------------------------------|-----------------------------------|---------------------------------------|-------------------------------|-----------------------|-----------------|-----------------------|
| M   | Kidney and Renal Pelvis          | Soft Tissue including Heart      | 25791          | 8                             | 0.5                               | 0.02                                  | 7.8                           | 1.02 (0.44 to 2.01)   | 59.5            | 74.8                  |
| M   | Kidney and Renal Pelvis          | Stomach                          | 25791          | 34                            | 2.0                               | 0.08                                  | 29.5                          | 1.15 (0.8 to 1.61)    | 59.5            | 77.6                  |
| M   | Kidney and Renal Pelvis          | Urinary Bladder                  | 25791          | 87                            | 5.2                               | 0.20                                  | 50.9                          | 1.71 (1.37 to 2.11)   | 59.5            | 77.3                  |
| M   | Larynx                           | Acute Non-lymphocytic Leukemia   | 9081           | 22                            | 3.6                               | 0.05                                  | 12.0                          | 1.83 (1.15 to 2.77)   | 62.5            | 76.4                  |
| M   | Larynx                           | Brain and Other Nervous System   | 9081           | 7                             | 1.2                               | 0.02                                  | 10.9                          | 0.64 (0.26 to 1.32)   | 62.5            | 74.8                  |
| M   | Larynx                           | Colon and Rectum                 | 9081           | 82                            | 13.6                              | 0.19                                  | 51.8                          | 1.59 (1.26 to 1.97)   | 62.5            | 75.5                  |
| M   | Larynx                           | Esophagus                        | 9081           | 83                            | 13.7                              | 0.19                                  | 19.4                          | 4.28 (3.41 to 5.31)   | 62.5            | 73.3                  |
| M   | Larynx                           | Kidney and Renal Pelvis          | 9081           | 17                            | 2.8                               | 0.04                                  | 15.0                          | 1.14 (0.66 to 1.82)   | 62.5            | 70.9                  |
| M   | Larynx                           | Liver and Intrahepatic Bile Duct | 9081           | 45                            | 7.4                               | 0.10                                  | 21.7                          | 2.08 (1.51 to 2.78)   | 62.5            | 73.3                  |
| M   | Larynx                           | Lung and Bronchus                | 9081           | 644                           | 106.4                             | 1.46                                  | 173.7                         | 3.71 (3.43 to 4)      | 62.5            | 73.6                  |
| M   | Larynx                           | Melanoma of the Skin             | 9081           | 10                            | 1.7                               | 0.02                                  | 9.1                           | 1.1 (0.53 to 2.02)    | 62.5            | 77.0                  |
| M   | Larynx                           | Myeloma                          | 9081           | 9                             | 1.5                               | 0.02                                  | 12.8                          | 0.71 (0.32 to 1.34)   | 62.5            | 77.0                  |
| M   | Larynx                           | Non-Hodgkin Lymphoma             | 9081           | 28                            | 4.6                               | 0.06                                  | 27.8                          | 1.01 (0.67 to 1.46)   | 62.5            | 77.4                  |
| M   | Larynx                           | Oral Cavity and Pharynx          | 9081           | 143                           | 23.6                              | 0.33                                  | 9.5                           | 15.07 (12.7 to 17.76) | 62.5            | 70.6                  |
| M   | Larynx                           | Pancreas                         | 9081           | 54                            | 8.9                               | 0.12                                  | 34.4                          | 1.57 (1.18 to 2.05)   | 62.5            | 75.2                  |
| M   | Larynx                           | Prostate                         | 9081           | 59                            | 9.8                               | 0.13                                  | 69.5                          | 0.85 (0.65 to 1.1)    | 62.5            | 79.6                  |
| M   | Larynx                           | Small Intestine                  | 9081           | 5                             | 0.8                               | 0.01                                  | 1.2                           | 4.01 (1.3 to 9.37)    | 62.5            | 78.2                  |
| M   | Larynx                           | Soft Tissue including Heart      | 9081           | 6                             | 1.0                               | 0.01                                  | 3.2                           | 1.86 (0.68 to 4.05)   | 62.5            | 76.3                  |
| M   | Larynx                           | Stomach                          | 9081           | 21                            | 3.5                               | 0.05                                  | 13.3                          | 1.58 (0.98 to 2.41)   | 62.5            | 79.5                  |
| M   | Larynx                           | Urinary Bladder                  | 9081           | 31                            | 5.1                               | 0.07                                  | 22.0                          | 1.41 (0.96 to 2)      | 62.5            | 78.3                  |
| M   | Liver and Intrahepatic Bile Duct | Acute Non-lymphocytic Leukemia   | 3613           | 8                             | 4.9                               | 0.02                                  | 1.9                           | 4.19 (1.81 to 8.26)   | 58.9            | 73.5                  |
| M   | Liver and Intrahepatic Bile Duct | Colon and Rectum                 | 3613           | 10                            | 6.2                               | 0.02                                  | 8.1                           | 1.23 (0.59 to 2.27)   | 58.9            | 70.0                  |
| M   | Liver and Intrahepatic Bile Duct | Lung and Bronchus                | 3613           | 36                            | 22.2                              | 0.08                                  | 26.8                          | 1.34 (0.94 to 1.86)   | 58.9            | 69.9                  |
| M   | Liver and Intrahepatic Bile Duct | Melanoma of the Skin             | 3613           | 5                             | 3.1                               | 0.01                                  | 1.3                           | 3.99 (1.3 to 9.31)    | 58.9            | 69.9                  |
| M   | Liver and Intrahepatic Bile Duct | Non-Hodgkin Lymphoma             | 3613           | 16                            | 9.9                               | 0.04                                  | 4.0                           | 4.03 (2.31 to 6.55)   | 58.9            | 65.5                  |
| M   | Liver and Intrahepatic Bile Duct | Pancreas                         | 3613           | 10                            | 6.2                               | 0.02                                  | 6.1                           | 1.63 (0.78 to 3)      | 58.9            | 66.0                  |
| M   | Liver and Intrahepatic Bile Duct | Prostate                         | 3613           | 7                             | 4.3                               | 0.02                                  | 7.9                           | 0.89 (0.36 to 1.82)   | 58.9            | 70.3                  |
| M   | Liver and Intrahepatic Bile Duct | Stomach                          | 3613           | 5                             | 3.1                               | 0.01                                  | 2.8                           | 1.79 (0.58 to 4.18)   | 58.9            | 71.8                  |
| M   | Lung and Bronchus                | Acute Non-lymphocytic Leukemia   | 20842          | 40                            | 3.7                               | 0.09                                  | 22.8                          | 1.75 (1.25 to 2.39)   | 64.3            | 74.6                  |
| M   | Lung and Bronchus                | Brain and Other Nervous System   | 20842          | 27                            | 2.5                               | 0.06                                  | 20.0                          | 1.35 (0.89 to 1.97)   | 64.3            | 75.0                  |
| M   | Lung and Bronchus                | Colon and Rectum                 | 20842          | 142                           | 13.0                              | 0.32                                  | 96.5                          | 1.47 (1.24 to 1.73)   | 64.3            | 75.9                  |
| M   | Lung and Bronchus                | Esophagus                        | 20842          | 97                            | 8.9                               | 0.22                                  | 35.4                          | 2.74 (2.22 to 3.34)   | 64.3            | 71.8                  |

| Sex | First Primary Cancer (FPC) | Subsequent Primary Cancer (SPC)  | Survivors, No. | Observed Number of SPC Deaths | Mortality per 10,000 person-years | % Contribution to the Total Mortality | Expected Number of SPC Deaths | SMR (95% CI)        | Mean Age at FPC | Mean Age at SPC Death |
|-----|----------------------------|----------------------------------|----------------|-------------------------------|-----------------------------------|---------------------------------------|-------------------------------|---------------------|-----------------|-----------------------|
| M   | Lung and Bronchus          | Gallbladder and Other Biliary    | 20842          | 9                             | 0.8                               | 0.02                                  | 5.6                           | 1.61 (0.74 to 3.06) | 64.3            | 75.5                  |
| M   | Lung and Bronchus          | Kidney and Renal Pelvis          | 20842          | 32                            | 2.9                               | 0.07                                  | 27.8                          | 1.15 (0.79 to 1.63) | 64.3            | 77.2                  |
| M   | Lung and Bronchus          | Larynx                           | 20842          | 26                            | 2.4                               | 0.06                                  | 9.8                           | 2.66 (1.74 to 3.9)  | 64.3            | 73.0                  |
| M   | Lung and Bronchus          | Liver and Intrahepatic Bile Duct | 20842          | 61                            | 5.6                               | 0.14                                  | 40.9                          | 1.49 (1.14 to 1.92) | 64.3            | 74.8                  |
| M   | Lung and Bronchus          | Melanoma of the Skin             | 20842          | 15                            | 1.4                               | 0.03                                  | 17.0                          | 0.88 (0.5 to 1.46)  | 64.3            | 75.0                  |
| M   | Lung and Bronchus          | Myeloma                          | 20842          | 20                            | 1.8                               | 0.05                                  | 23.7                          | 0.84 (0.52 to 1.3)  | 64.3            | 75.7                  |
| M   | Lung and Bronchus          | Non-Hodgkin Lymphoma             | 20842          | 55                            | 5.0                               | 0.13                                  | 53.0                          | 1.04 (0.78 to 1.35) | 64.3            | 77.1                  |
| M   | Lung and Bronchus          | Oral Cavity and Pharynx          | 20842          | 36                            | 3.3                               | 0.08                                  | 17.3                          | 2.08 (1.46 to 2.88) | 64.3            | 74.7                  |
| M   | Lung and Bronchus          | Pancreas                         | 20842          | 96                            | 8.8                               | 0.22                                  | 64.1                          | 1.5 (1.21 to 1.83)  | 64.3            | 75.4                  |
| M   | Lung and Bronchus          | Prostate                         | 20842          | 117                           | 10.7                              | 0.27                                  | 131.0                         | 0.89 (0.74 to 1.07) | 64.3            | 78.4                  |
| M   | Lung and Bronchus          | Small Intestine                  | 20842          | 6                             | 0.5                               | 0.01                                  | 2.3                           | 2.58 (0.95 to 5.62) | 64.3            | 70.0                  |
| M   | Lung and Bronchus          | Soft Tissue including Heart      | 20842          | 14                            | 1.3                               | 0.03                                  | 6.1                           | 2.31 (1.27 to 3.88) | 64.3            | 71.1                  |
| M   | Lung and Bronchus          | Stomach                          | 20842          | 48                            | 4.4                               | 0.11                                  | 25.4                          | 1.89 (1.39 to 2.5)  | 64.3            | 74.3                  |
| M   | Lung and Bronchus          | Urinary Bladder                  | 20842          | 75                            | 6.9                               | 0.17                                  | 42.2                          | 1.78 (1.4 to 2.23)  | 64.3            | 77.6                  |
| M   | Melanoma of the Skin       | Acute Lymphocytic Leukemia       | 44828          | 6                             | 0.2                               | 0.01                                  | 3.7                           | 1.62 (0.6 to 3.53)  | 56.5            | 69.0                  |
| M   | Melanoma of the Skin       | Acute Non-lymphocytic Leukemia   | 44828          | 52                            | 1.5                               | 0.12                                  | 54.5                          | 0.95 (0.71 to 1.25) | 56.5            | 73.0                  |
| M   | Melanoma of the Skin       | Bones and Joints                 | 44828          | 6                             | 0.2                               | 0.01                                  | 4.4                           | 1.37 (0.5 to 2.98)  | 56.5            | 70.7                  |
| M   | Melanoma of the Skin       | Brain and Other Nervous System   | 44828          | 95                            | 2.6                               | 0.22                                  | 57.0                          | 1.67 (1.35 to 2.04) | 56.5            | 70.7                  |
| M   | Melanoma of the Skin       | Breast                           | 44828          | 9                             | 0.3                               | 0.02                                  | 3.3                           | 2.7 (1.23 to 5.12)  | 56.5            | 66.7                  |
| M   | Melanoma of the Skin       | Colon and Rectum                 | 44828          | 159                           | 4.4                               | 0.36                                  | 213.7                         | 0.74 (0.63 to 0.87) | 56.5            | 74.8                  |
| M   | Melanoma of the Skin       | Esophagus                        | 44828          | 79                            | 2.2                               | 0.18                                  | 91.1                          | 0.87 (0.69 to 1.08) | 56.5            | 71.4                  |
| M   | Melanoma of the Skin       | Eye and Orbit                    | 44828          | 5                             | 0.1                               | 0.01                                  | 1.2                           | 4.03 (1.31 to 9.4)  | 56.5            | 74.1                  |
| M   | Melanoma of the Skin       | Gallbladder and Other Biliary    | 44828          | 5                             | 0.1                               | 0.01                                  | 12.0                          | 0.42 (0.14 to 0.97) | 56.5            | 78.5                  |
| M   | Melanoma of the Skin       | Kidney and Renal Pelvis          | 44828          | 60                            | 1.7                               | 0.14                                  | 69.0                          | 0.87 (0.66 to 1.12) | 56.5            | 72.9                  |
| M   | Melanoma of the Skin       | Larynx                           | 44828          | 8                             | 0.2                               | 0.02                                  | 21.9                          | 0.36 (0.16 to 0.72) | 56.5            | 74.0                  |
| M   | Melanoma of the Skin       | Liver and Intrahepatic Bile Duct | 44828          | 73                            | 2.0                               | 0.17                                  | 96.4                          | 0.76 (0.59 to 0.95) | 56.5            | 72.5                  |
| M   | Melanoma of the Skin       | Lung and Bronchus                | 44828          | 493                           | 13.7                              | 1.12                                  | 726.5                         | 0.68 (0.62 to 0.74) | 56.5            | 75.2                  |
| M   | Melanoma of the Skin       | Myeloma                          | 44828          | 71                            | 2.0                               | 0.16                                  | 51.2                          | 1.39 (1.08 to 1.75) | 56.5            | 73.8                  |
| M   | Melanoma of the Skin       | Non-Hodgkin Lymphoma             | 44828          | 131                           | 3.7                               | 0.30                                  | 124.5                         | 1.05 (0.88 to 1.25) | 56.5            | 75.6                  |
| M   | Melanoma of the Skin       | Oral Cavity and Pharynx          | 44828          | 40                            | 1.1                               | 0.09                                  | 43.5                          | 0.92 (0.66 to 1.25) | 56.5            | 71.7                  |
| M   | Melanoma of the Skin       | Pancreas                         | 44828          | 174                           | 4.9                               | 0.40                                  | 153.8                         | 1.13 (0.97 to 1.31) | 56.5            | 74.8                  |
| M   | Melanoma of the Skin       | Prostate                         | 44828          | 188                           | 5.2                               | 0.43                                  | 257.7                         | 0.73 (0.63 to 0.84) | 56.5            | 78.4                  |

| Sex | First Primary Cancer (FPC) | Subsequent Primary Cancer (SPC)  | Survivors, No. | Observed Number of SPC Deaths | Mortality per 10,000 person-years | % Contribution to the Total Mortality | Expected Number of SPC Deaths | SMR (95% CI)          | Mean Age at FPC | Mean Age at SPC Death |
|-----|----------------------------|----------------------------------|----------------|-------------------------------|-----------------------------------|---------------------------------------|-------------------------------|-----------------------|-----------------|-----------------------|
| M   | Melanoma of the Skin       | Small Intestine                  | 44828          | 8                             | 0.2                               | 0.02                                  | 5.4                           | 1.48 (0.64 to 2.92)   | 56.5            | 70.7                  |
| M   | Melanoma of the Skin       | Soft Tissue including Heart      | 44828          | 31                            | 0.9                               | 0.07                                  | 15.4                          | 2.01 (1.37 to 2.85)   | 56.5            | 73.3                  |
| M   | Melanoma of the Skin       | Stomach                          | 44828          | 34                            | 0.9                               | 0.08                                  | 47.5                          | 0.72 (0.5 to 1)       | 56.5            | 70.9                  |
| M   | Melanoma of the Skin       | Urinary Bladder                  | 44828          | 64                            | 1.8                               | 0.15                                  | 101.3                         | 0.63 (0.49 to 0.81)   | 56.5            | 78.8                  |
| M   | Myeloma                    | Acute Non-lymphocytic Leukemia   | 6683           | 26                            | 8.7                               | 0.06                                  | 4.8                           | 5.42 (3.54 to 7.93)   | 61.1            | 67.7                  |
| M   | Myeloma                    | Brain and Other Nervous System   | 6683           | 6                             | 2.0                               | 0.01                                  | 4.7                           | 1.27 (0.47 to 2.76)   | 61.1            | 76.9                  |
| M   | Myeloma                    | Colon and Rectum                 | 6683           | 23                            | 7.7                               | 0.05                                  | 21.1                          | 1.09 (0.69 to 1.63)   | 61.1            | 75.8                  |
| M   | Myeloma                    | Esophagus                        | 6683           | 9                             | 3.0                               | 0.02                                  | 8.2                           | 1.09 (0.5 to 2.08)    | 61.1            | 75.5                  |
| M   | Myeloma                    | Liver and Intrahepatic Bile Duct | 6683           | 17                            | 5.7                               | 0.04                                  | 10.1                          | 1.69 (0.99 to 2.71)   | 61.1            | 68.7                  |
| M   | Myeloma                    | Lung and Bronchus                | 6683           | 40                            | 13.4                              | 0.09                                  | 70.7                          | 0.57 (0.4 to 0.77)    | 61.1            | 74.9                  |
| M   | Myeloma                    | Melanoma of the Skin             | 6683           | 10                            | 3.3                               | 0.02                                  | 3.6                           | 2.76 (1.33 to 5.08)   | 61.1            | 70.4                  |
| M   | Myeloma                    | Non-Hodgkin Lymphoma             | 6683           | 30                            | 10.0                              | 0.07                                  | 10.8                          | 2.77 (1.87 to 3.96)   | 61.1            | 73.0                  |
| M   | Myeloma                    | Pancreas                         | 6683           | 15                            | 5.0                               | 0.03                                  | 14.7                          | 1.02 (0.57 to 1.69)   | 61.1            | 72.6                  |
| M   | Myeloma                    | Prostate                         | 6683           | 25                            | 8.4                               | 0.06                                  | 27.5                          | 0.91 (0.59 to 1.34)   | 61.1            | 76.4                  |
| M   | Myeloma                    | Urinary Bladder                  | 6683           | 10                            | 3.3                               | 0.02                                  | 8.5                           | 1.17 (0.56 to 2.15)   | 61.1            | 78.3                  |
| M   | Non-Hodgkin Lymphoma       | Acute Lymphocytic Leukemia       | 44041          | 28                            | 1.0                               | 0.06                                  | 3.1                           | 9.06 (6.02 to 13.1)   | 59.2            | 68.0                  |
| M   | Non-Hodgkin Lymphoma       | Acute Non-lymphocytic Leukemia   | 44041          | 201                           | 6.9                               | 0.46                                  | 47.5                          | 4.24 (3.67 to 4.86)   | 59.2            | 70.1                  |
| M   | Non-Hodgkin Lymphoma       | Anus, Anal Canal and Anorectum   | 44041          | 5                             | 0.2                               | 0.01                                  | 1.8                           | 2.79 (0.9 to 6.5)     | 59.2            | 61.5                  |
| M   | Non-Hodgkin Lymphoma       | Brain and Other Nervous System   | 44041          | 61                            | 2.1                               | 0.14                                  | 46.0                          | 1.33 (1.01 to 1.7)    | 59.2            | 71.6                  |
| M   | Non-Hodgkin Lymphoma       | Chronic Myeloid Leukemia         | 44041          | 23                            | 0.8                               | 0.05                                  | 4.6                           | 5.03 (3.19 to 7.54)   | 59.2            | 72.8                  |
| M   | Non-Hodgkin Lymphoma       | Colon and Rectum                 | 44041          | 193                           | 6.7                               | 0.44                                  | 193.3                         | 1 (0.86 to 1.15)      | 59.2            | 75.4                  |
| M   | Non-Hodgkin Lymphoma       | Esophagus                        | 44041          | 86                            | 3.0                               | 0.20                                  | 76.6                          | 1.12 (0.9 to 1.39)    | 59.2            | 72.6                  |
| M   | Non-Hodgkin Lymphoma       | Gallbladder and Other Biliary    | 44041          | 12                            | 0.4                               | 0.03                                  | 11.1                          | 1.08 (0.56 to 1.89)   | 59.2            | 74.1                  |
| M   | Non-Hodgkin Lymphoma       | Hodgkin Lymphoma                 | 44041          | 74                            | 2.6                               | 0.17                                  | 3.7                           | 20.12 (15.8 to 25.26) | 59.2            | 70.6                  |
| M   | Non-Hodgkin Lymphoma       | Kidney and Renal Pelvis          | 44041          | 57                            | 2.0                               | 0.13                                  | 59.3                          | 0.96 (0.73 to 1.25)   | 59.2            | 72.4                  |
| M   | Non-Hodgkin Lymphoma       | Larynx                           | 44041          | 13                            | 0.4                               | 0.03                                  | 19.7                          | 0.66 (0.35 to 1.13)   | 59.2            | 73.1                  |
| M   | Non-Hodgkin Lymphoma       | Liver and Intrahepatic Bile Duct | 44041          | 125                           | 4.3                               | 0.28                                  | 88.6                          | 1.41 (1.18 to 1.68)   | 59.2            | 71.0                  |
| M   | Non-Hodgkin Lymphoma       | Lung and Bronchus                | 44041          | 672                           | 23.2                              | 1.53                                  | 642.7                         | 1.05 (0.97 to 1.13)   | 59.2            | 73.9                  |
| M   | Non-Hodgkin Lymphoma       | Melanoma of the Skin             | 44041          | 77                            | 2.7                               | 0.18                                  | 38.7                          | 1.99 (1.57 to 2.49)   | 59.2            | 75.3                  |
| M   | Non-Hodgkin Lymphoma       | Myeloma                          | 44041          | 69                            | 2.4                               | 0.16                                  | 46.9                          | 1.47 (1.15 to 1.86)   | 59.2            | 74.5                  |
| M   | Non-Hodgkin Lymphoma       | Oral Cavity and Pharynx          | 44041          | 45                            | 1.6                               | 0.10                                  | 37.7                          | 1.19 (0.87 to 1.6)    | 59.2            | 72.2                  |
| M   | Non-Hodgkin Lymphoma       | Pancreas                         | 44041          | 167                           | 5.8                               | 0.38                                  | 134.8                         | 1.24 (1.06 to 1.44)   | 59.2            | 75.0                  |

| Sex | First Primary Cancer (FPC)     | Subsequent Primary Cancer (SPC)  | Survivors, No. | Observed Number of SPC Deaths | Mortality per 10,000 person-years | % Contribution to the Total Mortality | Expected Number of SPC Deaths | SMR (95% CI)          | Mean Age at FPC | Mean Age at SPC Death |
|-----|--------------------------------|----------------------------------|----------------|-------------------------------|-----------------------------------|---------------------------------------|-------------------------------|-----------------------|-----------------|-----------------------|
| M   | Non-Hodgkin Lymphoma           | Prostate                         | 44041          | 184                           | 6.4                               | 0.42                                  | 246.3                         | 0.75 (0.64 to 0.86)   | 59.2            | 80.0                  |
| M   | Non-Hodgkin Lymphoma           | Small Intestine                  | 44041          | 8                             | 0.3                               | 0.02                                  | 4.8                           | 1.66 (0.72 to 3.26)   | 59.2            | 76.5                  |
| M   | Non-Hodgkin Lymphoma           | Soft Tissue including Heart      | 44041          | 31                            | 1.1                               | 0.07                                  | 13.2                          | 2.34 (1.59 to 3.32)   | 59.2            | 71.4                  |
| M   | Non-Hodgkin Lymphoma           | Stomach                          | 44041          | 76                            | 2.6                               | 0.17                                  | 47.5                          | 1.6 (1.26 to 2)       | 59.2            | 75.1                  |
| M   | Non-Hodgkin Lymphoma           | Thyroid                          | 44041          | 5                             | 0.2                               | 0.01                                  | 5.4                           | 0.92 (0.3 to 2.15)    | 59.2            | 74.8                  |
| M   | Non-Hodgkin Lymphoma           | Urinary Bladder                  | 44041          | 99                            | 3.4                               | 0.23                                  | 88.5                          | 1.12 (0.91 to 1.36)   | 59.2            | 78.7                  |
| M   | Oral Cavity and Pharynx        | Acute Non-lymphocytic Leukemia   | 22743          | 29                            | 1.9                               | 0.07                                  | 22.2                          | 1.31 (0.88 to 1.88)   | 57.5            | 70.1                  |
| M   | Oral Cavity and Pharynx        | Bones and Joints                 | 22743          | 18                            | 1.2                               | 0.04                                  | 1.8                           | 10.09 (5.98 to 15.95) | 57.5            | 68.2                  |
| M   | Oral Cavity and Pharynx        | Brain and Other Nervous System   | 22743          | 36                            | 2.3                               | 0.08                                  | 23.3                          | 1.54 (1.08 to 2.14)   | 57.5            | 70.1                  |
| M   | Oral Cavity and Pharynx        | Colon and Rectum                 | 22743          | 141                           | 9.2                               | 0.32                                  | 93.0                          | 1.52 (1.28 to 1.79)   | 57.5            | 74.1                  |
| M   | Oral Cavity and Pharynx        | Esophagus                        | 22743          | 195                           | 12.7                              | 0.44                                  | 38.4                          | 5.08 (4.39 to 5.85)   | 57.5            | 67.8                  |
| M   | Oral Cavity and Pharynx        | Gallbladder and Other Biliary    | 22743          | 10                            | 0.6                               | 0.02                                  | 5.3                           | 1.88 (0.9 to 3.46)    | 57.5            | 72.9                  |
| M   | Oral Cavity and Pharynx        | Kidney and Renal Pelvis          | 22743          | 29                            | 1.9                               | 0.07                                  | 28.9                          | 1 (0.67 to 1.44)      | 57.5            | 72.4                  |
| M   | Oral Cavity and Pharynx        | Larynx                           | 22743          | 214                           | 13.9                              | 0.49                                  | 9.9                           | 21.51 (18.73 to 24.6) | 57.5            | 70.1                  |
| M   | Oral Cavity and Pharynx        | Liver and Intrahepatic Bile Duct | 22743          | 71                            | 4.6                               | 0.16                                  | 46.4                          | 1.53 (1.19 to 1.93)   | 57.5            | 69.1                  |
| M   | Oral Cavity and Pharynx        | Lung and Bronchus                | 22743          | 794                           | 51.6                              | 1.80                                  | 316.0                         | 2.51 (2.34 to 2.69)   | 57.5            | 71.0                  |
| M   | Oral Cavity and Pharynx        | Melanoma of the Skin             | 22743          | 30                            | 1.9                               | 0.07                                  | 18.1                          | 1.65 (1.12 to 2.36)   | 57.5            | 69.4                  |
| M   | Oral Cavity and Pharynx        | Myeloma                          | 22743          | 16                            | 1.0                               | 0.04                                  | 22.0                          | 0.73 (0.42 to 1.18)   | 57.5            | 69.0                  |
| M   | Oral Cavity and Pharynx        | Non-Hodgkin Lymphoma             | 22743          | 98                            | 6.4                               | 0.22                                  | 50.0                          | 1.96 (1.59 to 2.39)   | 57.5            | 72.3                  |
| M   | Oral Cavity and Pharynx        | Pancreas                         | 22743          | 79                            | 5.1                               | 0.18                                  | 65.7                          | 1.2 (0.95 to 1.5)     | 57.5            | 73.1                  |
| M   | Oral Cavity and Pharynx        | Prostate                         | 22743          | 110                           | 7.1                               | 0.25                                  | 106.7                         | 1.03 (0.85 to 1.24)   | 57.5            | 76.0                  |
| M   | Oral Cavity and Pharynx        | Soft Tissue including Heart      | 22743          | 15                            | 1.0                               | 0.03                                  | 6.4                           | 2.36 (1.32 to 3.89)   | 57.5            | 68.4                  |
| M   | Oral Cavity and Pharynx        | Stomach                          | 22743          | 23                            | 1.5                               | 0.05                                  | 23.6                          | 0.97 (0.62 to 1.46)   | 57.5            | 74.2                  |
| M   | Oral Cavity and Pharynx        | Urinary Bladder                  | 22743          | 51                            | 3.3                               | 0.12                                  | 38.5                          | 1.33 (0.99 to 1.74)   | 57.5            | 77.4                  |
| M   | Pancreas                       | Colon and Rectum                 | 1667           | 6                             | 7.7                               | 0.01                                  | 5.4                           | 1.11 (0.41 to 2.42)   | 60.1            | 70.1                  |
| M   | Pancreas                       | Liver and Intrahepatic Bile Duct | 1667           | 7                             | 9.0                               | 0.02                                  | 2.6                           | 2.69 (1.08 to 5.53)   | 60.1            | 71.4                  |
| M   | Pancreas                       | Lung and Bronchus                | 1667           | 26                            | 33.3                              | 0.06                                  | 17.9                          | 1.45 (0.95 to 2.13)   | 60.1            | 73.0                  |
| M   | Pancreas                       | Non-Hodgkin Lymphoma             | 1667           | 6                             | 7.7                               | 0.01                                  | 3.0                           | 2.03 (0.74 to 4.41)   | 60.1            | 78.7                  |
| M   | Pancreas                       | Prostate                         | 1667           | 7                             | 9.0                               | 0.02                                  | 6.9                           | 1.02 (0.41 to 2.1)    | 60.1            | 77.3                  |
| M   | Penis and Other Genital Organs | Acute Non-lymphocytic Leukemia   | 1566           | 5                             | 4.7                               | 0.01                                  | 2.1                           | 2.41 (0.78 to 5.61)   | 61.7            | 80.5                  |
| M   | Penis and Other Genital Organs | Colon and Rectum                 | 1566           | 13                            | 12.1                              | 0.03                                  | 8.8                           | 1.49 (0.79 to 2.54)   | 61.7            | 72.9                  |
| M   | Penis and Other Genital Organs | Kidney and Renal Pelvis          | 1566           | 6                             | 5.6                               | 0.01                                  | 2.5                           | 2.38 (0.87 to 5.17)   | 61.7            | 82.1                  |



| Sex | First Primary Cancer (FPC)     | Subsequent Primary Cancer (SPC)  | Survivors, No. | Observed Number of SPC Deaths | Mortality per 10,000 person-years | % Contribution to the Total Mortality | Expected Number of SPC Deaths | SMR (95% CI)           | Mean Age at FPC | Mean Age at SPC Death |
|-----|--------------------------------|----------------------------------|----------------|-------------------------------|-----------------------------------|---------------------------------------|-------------------------------|------------------------|-----------------|-----------------------|
| M   | Penis and Other Genital Organs | Liver and Intrahepatic Bile Duct | 1566           | 5                             | 4.7                               | 0.01                                  | 3.8                           | 1.31 (0.43 to 3.06)    | 61.7            | 72.5                  |
| M   | Penis and Other Genital Organs | Lung and Bronchus                | 1566           | 44                            | 41.0                              | 0.10                                  | 28.2                          | 1.56 (1.13 to 2.09)    | 61.7            | 73.3                  |
| M   | Penis and Other Genital Organs | Non-Hodgkin Lymphoma             | 1566           | 10                            | 9.3                               | 0.02                                  | 4.9                           | 2.05 (0.98 to 3.76)    | 61.7            | 76.8                  |
| M   | Penis and Other Genital Organs | Prostate                         | 1566           | 16                            | 14.9                              | 0.04                                  | 12.0                          | 1.34 (0.76 to 2.17)    | 61.7            | 77.7                  |
| M   | Penis and Other Genital Organs | Soft Tissue including Heart      | 1566           | 19                            | 17.7                              | 0.04                                  | 0.6                           | 33.91 (20.42 to 52.96) | 61.7            | 69.6                  |
| M   | Prostate                       | Acute Lymphocytic Leukemia       | 384653         | 41                            | 0.2                               | 0.09                                  | 39.1                          | 1.05 (0.75 to 1.42)    | 66.4            | 78.2                  |
| M   | Prostate                       | Acute Non-lymphocytic Leukemia   | 384653         | 838                           | 3.1                               | 1.90                                  | 699.0                         | 1.2 (1.12 to 1.28)     | 66.4            | 79.2                  |
| M   | Prostate                       | Anus, Anal Canal and Anorectum   | 384653         | 32                            | 0.1                               | 0.07                                  | 22.2                          | 1.44 (0.99 to 2.03)    | 66.4            | 78.1                  |
| M   | Prostate                       | Bones and Joints                 | 384653         | 55                            | 0.2                               | 0.13                                  | 52.5                          | 1.05 (0.79 to 1.37)    | 66.4            | 78.8                  |
| M   | Prostate                       | Brain and Other Nervous System   | 384653         | 654                           | 2.4                               | 1.49                                  | 558.8                         | 1.17 (1.08 to 1.26)    | 66.4            | 76.8                  |
| M   | Prostate                       | Breast                           | 384653         | 33                            | 0.1                               | 0.08                                  | 45.4                          | 0.73 (0.5 to 1.02)     | 66.4            | 78.8                  |
| M   | Prostate                       | Chronic Myeloid Leukemia         | 384653         | 70                            | 0.3                               | 0.16                                  | 70.6                          | 0.99 (0.77 to 1.25)    | 66.4            | 78.8                  |
| M   | Prostate                       | Colon and Rectum                 | 384653         | 2405                          | 8.9                               | 5.47                                  | 2959.8                        | 0.81 (0.78 to 0.85)    | 66.4            | 79.5                  |
| M   | Prostate                       | Esophagus                        | 384653         | 897                           | 3.3                               | 2.04                                  | 1026.1                        | 0.87 (0.82 to 0.93)    | 66.4            | 77.7                  |
| M   | Prostate                       | Eye and Orbit                    | 384653         | 21                            | 0.1                               | 0.05                                  | 13.0                          | 1.62 (1 to 2.47)       | 66.4            | 75.9                  |
| M   | Prostate                       | Gallbladder and Other Biliary    | 384653         | 173                           | 0.6                               | 0.39                                  | 170.4                         | 1.02 (0.87 to 1.18)    | 66.4            | 79.0                  |
| M   | Prostate                       | Hodgkin Lymphoma                 | 384653         | 45                            | 0.2                               | 0.10                                  | 49.7                          | 0.91 (0.66 to 1.21)    | 66.4            | 79.6                  |
| M   | Prostate                       | Kidney and Renal Pelvis          | 384653         | 715                           | 2.6                               | 1.63                                  | 828.6                         | 0.86 (0.8 to 0.93)     | 66.4            | 78.4                  |
| M   | Prostate                       | Larynx                           | 384653         | 156                           | 0.6                               | 0.35                                  | 287.3                         | 0.54 (0.46 to 0.64)    | 66.4            | 78.2                  |
| M   | Prostate                       | Liver and Intrahepatic Bile Duct | 384653         | 959                           | 3.6                               | 2.18                                  | 1144.8                        | 0.84 (0.79 to 0.89)    | 66.4            | 78.1                  |
| M   | Prostate                       | Lung and Bronchus                | 384653         | 7208                          | 26.7                              | 16.38                                 | 9500.0                        | 0.76 (0.74 to 0.78)    | 66.4            | 78.2                  |
| M   | Prostate                       | Melanoma of the Skin             | 384653         | 483                           | 1.8                               | 1.10                                  | 511.4                         | 0.94 (0.86 to 1.03)    | 66.4            | 79.0                  |
| M   | Prostate                       | Myeloma                          | 384653         | 814                           | 3.0                               | 1.85                                  | 751.4                         | 1.08 (1.01 to 1.16)    | 66.4            | 79.1                  |
| M   | Prostate                       | Non-Hodgkin Lymphoma             | 384653         | 1481                          | 5.5                               | 3.37                                  | 1652.3                        | 0.9 (0.85 to 0.94)     | 66.4            | 80.1                  |
| M   | Prostate                       | Oral Cavity and Pharynx          | 384653         | 356                           | 1.3                               | 0.81                                  | 493.9                         | 0.72 (0.65 to 0.8)     | 66.4            | 77.5                  |
| M   | Prostate                       | Pancreas                         | 384653         | 2088                          | 7.7                               | 4.75                                  | 1925.7                        | 1.08 (1.04 to 1.13)    | 66.4            | 78.2                  |
| M   | Prostate                       | Penis and Other Genital Organs   | 384653         | 29                            | 0.1                               | 0.07                                  | 33.5                          | 0.87 (0.58 to 1.24)    | 66.4            | 79.9                  |
| M   | Prostate                       | Small Intestine                  | 384653         | 83                            | 0.3                               | 0.19                                  | 71.4                          | 1.16 (0.93 to 1.44)    | 66.4            | 78.2                  |
| M   | Prostate                       | Soft Tissue including Heart      | 384653         | 234                           | 0.9                               | 0.53                                  | 181.1                         | 1.29 (1.13 to 1.47)    | 66.4            | 77.7                  |
| M   | Prostate                       | Stomach                          | 384653         | 722                           | 2.7                               | 1.64                                  | 759.4                         | 0.95 (0.88 to 1.02)    | 66.4            | 78.7                  |
| M   | Prostate                       | Testis                           | 384653         | 5                             | 0.0                               | 0.01                                  | 8.1                           | 0.62 (0.2 to 1.45)     | 66.4            | 82.1                  |
| M   | Prostate                       | Thyroid                          | 384653         | 58                            | 0.2                               | 0.13                                  | 75.9                          | 0.77 (0.58 to 0.99)    | 66.4            | 77.5                  |

| Sex | First Primary Cancer (FPC)  | Subsequent Primary Cancer (SPC)  | Survivors, No. | Observed Number of SPC Deaths | Mortality per 10,000 person-years | % Contribution to the Total Mortality | Expected Number of SPC Deaths | SMR (95% CI)           | Mean Age at FPC | Mean Age at SPC Death |
|-----|-----------------------------|----------------------------------|----------------|-------------------------------|-----------------------------------|---------------------------------------|-------------------------------|------------------------|-----------------|-----------------------|
| M   | Prostate                    | Urinary Bladder                  | 384653         | 1354                          | 5.0                               | 3.08                                  | 1391.8                        | 0.97 (0.92 to 1.03)    | 66.4            | 80.3                  |
| M   | Small Intestine             | Colon and Rectum                 | 2755           | 71                            | 41.9                              | 0.16                                  | 11.3                          | 6.29 (4.91 to 7.93)    | 59.1            | 70.5                  |
| M   | Small Intestine             | Liver and Intrahepatic Bile Duct | 2755           | 25                            | 14.7                              | 0.06                                  | 5.5                           | 4.57 (2.96 to 6.75)    | 59.1            | 71.9                  |
| M   | Small Intestine             | Lung and Bronchus                | 2755           | 33                            | 19.5                              | 0.08                                  | 37.5                          | 0.88 (0.61 to 1.24)    | 59.1            | 75.2                  |
| M   | Small Intestine             | Non-Hodgkin Lymphoma             | 2755           | 10                            | 5.9                               | 0.02                                  | 6.0                           | 1.68 (0.8 to 3.08)     | 59.1            | 75.5                  |
| M   | Small Intestine             | Oral Cavity and Pharynx          | 2755           | 6                             | 3.5                               | 0.01                                  | 2.3                           | 2.62 (0.96 to 5.7)     | 59.1            | 68.9                  |
| M   | Small Intestine             | Pancreas                         | 2755           | 18                            | 10.6                              | 0.04                                  | 7.9                           | 2.27 (1.34 to 3.58)    | 59.1            | 67.2                  |
| M   | Small Intestine             | Prostate                         | 2755           | 14                            | 8.3                               | 0.03                                  | 14.5                          | 0.97 (0.53 to 1.62)    | 59.1            | 78.3                  |
| M   | Small Intestine             | Soft Tissue including Heart      | 2755           | 35                            | 20.6                              | 0.08                                  | 0.8                           | 46.37 (32.3 to 64.49)  | 59.1            | 65.2                  |
| M   | Small Intestine             | Stomach                          | 2755           | 19                            | 11.2                              | 0.04                                  | 2.9                           | 6.57 (3.95 to 10.25)   | 59.1            | 67.8                  |
| M   | Soft Tissue including Heart | Acute Non-lymphocytic Leukemia   | 5080           | 11                            | 2.8                               | 0.03                                  | 4.8                           | 2.29 (1.14 to 4.1)     | 52.9            | 66.7                  |
| M   | Soft Tissue including Heart | Bones and Joints                 | 5080           | 32                            | 8.2                               | 0.07                                  | 0.4                           | 78.36 (53.6 to 110.62) | 52.9            | 55.8                  |
| M   | Soft Tissue including Heart | Brain and Other Nervous System   | 5080           | 10                            | 2.6                               | 0.02                                  | 5.0                           | 2.01 (0.97 to 3.7)     | 52.9            | 61.7                  |
| M   | Soft Tissue including Heart | Colon and Rectum                 | 5080           | 27                            | 6.9                               | 0.06                                  | 20.5                          | 1.32 (0.87 to 1.92)    | 52.9            | 68.2                  |
| M   | Soft Tissue including Heart | Esophagus                        | 5080           | 5                             | 1.3                               | 0.01                                  | 8.0                           | 0.62 (0.2 to 1.45)     | 52.9            | 72.9                  |
| M   | Soft Tissue including Heart | Kidney and Renal Pelvis          | 5080           | 8                             | 2.0                               | 0.02                                  | 6.2                           | 1.29 (0.56 to 2.55)    | 52.9            | 69.1                  |
| M   | Soft Tissue including Heart | Liver and Intrahepatic Bile Duct | 5080           | 8                             | 2.0                               | 0.02                                  | 9.8                           | 0.82 (0.35 to 1.61)    | 52.9            | 66.4                  |
| M   | Soft Tissue including Heart | Lung and Bronchus                | 5080           | 84                            | 21.5                              | 0.19                                  | 66.4                          | 1.27 (1.01 to 1.57)    | 52.9            | 71.4                  |
| M   | Soft Tissue including Heart | Melanoma of the Skin             | 5080           | 8                             | 2.0                               | 0.02                                  | 4.0                           | 2.02 (0.87 to 3.99)    | 52.9            | 75.3                  |
| M   | Soft Tissue including Heart | Myeloma                          | 5080           | 13                            | 3.3                               | 0.03                                  | 4.9                           | 2.68 (1.43 to 4.58)    | 52.9            | 77.8                  |
| M   | Soft Tissue including Heart | Non-Hodgkin Lymphoma             | 5080           | 17                            | 4.3                               | 0.04                                  | 11.0                          | 1.54 (0.9 to 2.46)     | 52.9            | 75.5                  |
| M   | Soft Tissue including Heart | Oral Cavity and Pharynx          | 5080           | 6                             | 1.5                               | 0.01                                  | 4.1                           | 1.46 (0.53 to 3.17)    | 52.9            | 67.5                  |
| M   | Soft Tissue including Heart | Pancreas                         | 5080           | 19                            | 4.9                               | 0.04                                  | 14.1                          | 1.35 (0.81 to 2.11)    | 52.9            | 75.0                  |
| M   | Soft Tissue including Heart | Prostate                         | 5080           | 21                            | 5.4                               | 0.05                                  | 25.3                          | 0.83 (0.51 to 1.27)    | 52.9            | 79.0                  |
| M   | Soft Tissue including Heart | Stomach                          | 5080           | 13                            | 3.3                               | 0.03                                  | 5.2                           | 2.49 (1.33 to 4.26)    | 52.9            | 63.2                  |
| M   | Soft Tissue including Heart | Urinary Bladder                  | 5080           | 14                            | 3.6                               | 0.03                                  | 8.8                           | 1.6 (0.87 to 2.68)     | 52.9            | 74.6                  |
| M   | Stomach                     | Acute Non-lymphocytic Leukemia   | 6114           | 8                             | 2.2                               | 0.02                                  | 7.0                           | 1.14 (0.49 to 2.25)    | 63.1            | 76.7                  |
| M   | Stomach                     | Brain and Other Nervous System   | 6114           | 8                             | 2.2                               | 0.02                                  | 5.8                           | 1.38 (0.6 to 2.72)     | 63.1            | 76.2                  |
| M   | Stomach                     | Colon and Rectum                 | 6114           | 26                            | 7.0                               | 0.06                                  | 30.7                          | 0.85 (0.55 to 1.24)    | 63.1            | 74.7                  |
| M   | Stomach                     | Esophagus                        | 6114           | 190                           | 51.1                              | 0.43                                  | 10.3                          | 18.37 (15.85 to 21.18) | 63.1            | 69.5                  |
| M   | Stomach                     | Kidney and Renal Pelvis          | 6114           | 6                             | 1.6                               | 0.01                                  | 8.5                           | 0.71 (0.26 to 1.54)    | 63.1            | 73.8                  |
| M   | Stomach                     | Liver and Intrahepatic Bile Duct | 6114           | 30                            | 8.1                               | 0.07                                  | 15.5                          | 1.94 (1.31 to 2.77)    | 63.1            | 74.7                  |

| Sex | First Primary Cancer (FPC) | Subsequent Primary Cancer (SPC)  | Survivors, No. | Observed Number of SPC Deaths | Mortality per 10,000 person-years | % Contribution to the Total Mortality | Expected Number of SPC Deaths | SMR (95% CI)           | Mean Age at FPC | Mean Age at SPC Death |
|-----|----------------------------|----------------------------------|----------------|-------------------------------|-----------------------------------|---------------------------------------|-------------------------------|------------------------|-----------------|-----------------------|
| M   | Stomach                    | Lung and Bronchus                | 6114           | 138                           | 37.1                              | 0.31                                  | 96.2                          | 1.43 (1.21 to 1.7)     | 63.1            | 75.6                  |
| M   | Stomach                    | Non-Hodgkin Lymphoma             | 6114           | 24                            | 6.5                               | 0.05                                  | 16.2                          | 1.48 (0.95 to 2.2)     | 63.1            | 76.3                  |
| M   | Stomach                    | Pancreas                         | 6114           | 44                            | 11.8                              | 0.10                                  | 20.2                          | 2.18 (1.58 to 2.92)    | 63.1            | 73.8                  |
| M   | Stomach                    | Prostate                         | 6114           | 31                            | 8.3                               | 0.07                                  | 42.7                          | 0.73 (0.49 to 1.03)    | 63.1            | 80.3                  |
| M   | Stomach                    | Soft Tissue including Heart      | 6114           | 29                            | 7.8                               | 0.07                                  | 1.9                           | 15.19 (10.17 to 21.82) | 63.1            | 72.3                  |
| M   | Stomach                    | Urinary Bladder                  | 6114           | 19                            | 5.1                               | 0.04                                  | 12.9                          | 1.47 (0.88 to 2.29)    | 63.1            | 77.8                  |
| M   | Testis                     | Acute Non-lymphocytic Leukemia   | 17695          | 13                            | 0.7                               | 0.03                                  | 4.9                           | 2.66 (1.42 to 4.54)    | 35.8            | 63.5                  |
| M   | Testis                     | Brain and Other Nervous System   | 17695          | 13                            | 0.7                               | 0.03                                  | 10.6                          | 1.23 (0.65 to 2.1)     | 35.8            | 53.3                  |
| M   | Testis                     | Colon and Rectum                 | 17695          | 30                            | 1.7                               | 0.07                                  | 23.7                          | 1.27 (0.85 to 1.81)    | 35.8            | 57.0                  |
| M   | Testis                     | Esophagus                        | 17695          | 10                            | 0.6                               | 0.02                                  | 11.5                          | 0.87 (0.42 to 1.6)     | 35.8            | 55.3                  |
| M   | Testis                     | Liver and Intrahepatic Bile Duct | 17695          | 13                            | 0.7                               | 0.03                                  | 15.4                          | 0.85 (0.45 to 1.45)    | 35.8            | 60.6                  |
| M   | Testis                     | Lung and Bronchus                | 17695          | 60                            | 3.4                               | 0.14                                  | 67.8                          | 0.88 (0.68 to 1.14)    | 35.8            | 64.5                  |
| M   | Testis                     | Melanoma of the Skin             | 17695          | 8                             | 0.5                               | 0.02                                  | 6.3                           | 1.27 (0.55 to 2.5)     | 35.8            | 56.8                  |
| M   | Testis                     | Non-Hodgkin Lymphoma             | 17695          | 11                            | 0.6                               | 0.03                                  | 10.1                          | 1.09 (0.55 to 1.96)    | 35.8            | 61.9                  |
| M   | Testis                     | Oral Cavity and Pharynx          | 17695          | 5                             | 0.3                               | 0.01                                  | 6.8                           | 0.74 (0.24 to 1.73)    | 35.8            | 63.7                  |
| M   | Testis                     | Pancreas                         | 17695          | 31                            | 1.7                               | 0.07                                  | 16.8                          | 1.85 (1.26 to 2.63)    | 35.8            | 60.6                  |
| M   | Testis                     | Prostate                         | 17695          | 9                             | 0.5                               | 0.02                                  | 11.0                          | 0.82 (0.38 to 1.56)    | 35.8            | 60.1                  |
| M   | Testis                     | Soft Tissue including Heart      | 17695          | 12                            | 0.7                               | 0.03                                  | 2.4                           | 4.99 (2.58 to 8.71)    | 35.8            | 53.1                  |
| M   | Testis                     | Stomach                          | 17695          | 14                            | 0.8                               | 0.03                                  | 5.8                           | 2.4 (1.31 to 4.02)     | 35.8            | 61.7                  |
| M   | Testis                     | Urinary Bladder                  | 17695          | 12                            | 0.7                               | 0.03                                  | 5.9                           | 2.04 (1.05 to 3.56)    | 35.8            | 61.0                  |
| M   | Thyroid                    | Acute Non-lymphocytic Leukemia   | 12333          | 18                            | 1.8                               | 0.04                                  | 9.1                           | 1.99 (1.18 to 3.14)    | 49.8            | 67.8                  |
| M   | Thyroid                    | Bones and Joints                 | 12333          | 5                             | 0.5                               | 0.01                                  | 0.8                           | 6.13 (1.99 to 14.3)    | 49.8            | 55.1                  |
| M   | Thyroid                    | Brain and Other Nervous System   | 12333          | 19                            | 1.9                               | 0.04                                  | 11.2                          | 1.7 (1.03 to 2.66)     | 49.8            | 63.6                  |
| M   | Thyroid                    | Colon and Rectum                 | 12333          | 31                            | 3.2                               | 0.07                                  | 38.1                          | 0.81 (0.55 to 1.15)    | 49.8            | 73.9                  |
| M   | Thyroid                    | Esophagus                        | 12333          | 15                            | 1.5                               | 0.03                                  | 16.8                          | 0.89 (0.5 to 1.47)     | 49.8            | 68.2                  |
| M   | Thyroid                    | Kidney and Renal Pelvis          | 12333          | 26                            | 2.7                               | 0.06                                  | 12.4                          | 2.1 (1.37 to 3.07)     | 49.8            | 69.8                  |
| M   | Thyroid                    | Liver and Intrahepatic Bile Duct | 12333          | 22                            | 2.2                               | 0.05                                  | 21.5                          | 1.02 (0.64 to 1.55)    | 49.8            | 70.7                  |
| M   | Thyroid                    | Lung and Bronchus                | 12333          | 93                            | 9.5                               | 0.21                                  | 127.6                         | 0.73 (0.59 to 0.89)    | 49.8            | 70.3                  |
| M   | Thyroid                    | Melanoma of the Skin             | 12333          | 11                            | 1.1                               | 0.03                                  | 8.0                           | 1.38 (0.69 to 2.47)    | 49.8            | 70.0                  |
| M   | Thyroid                    | Myeloma                          | 12333          | 17                            | 1.7                               | 0.04                                  | 8.8                           | 1.94 (1.13 to 3.11)    | 49.8            | 71.8                  |
| M   | Thyroid                    | Non-Hodgkin Lymphoma             | 12333          | 24                            | 2.5                               | 0.05                                  | 19.7                          | 1.22 (0.78 to 1.81)    | 49.8            | 72.6                  |
| M   | Thyroid                    | Pancreas                         | 12333          | 34                            | 3.5                               | 0.08                                  | 28.0                          | 1.21 (0.84 to 1.69)    | 49.8            | 70.2                  |

| Sex | First Primary Cancer (FPC)     | Subsequent Primary Cancer (SPC)  | Survivors, No. | Observed Number of SPC Deaths | Mortality per 10,000 person-years | % Contribution to the Total Mortality | Expected Number of SPC Deaths | SMR (95% CI)            | Mean Age at FPC | Mean Age at SPC Death |
|-----|--------------------------------|----------------------------------|----------------|-------------------------------|-----------------------------------|---------------------------------------|-------------------------------|-------------------------|-----------------|-----------------------|
| M   | Thyroid                        | Prostate                         | 12333          | 34                            | 3.5                               | 0.08                                  | 38.1                          | 0.89 (0.62 to 1.25)     | 49.8            | 78.4                  |
| M   | Thyroid                        | Soft Tissue including Heart      | 12333          | 7                             | 0.7                               | 0.02                                  | 2.9                           | 2.43 (0.98 to 5.01)     | 49.8            | 56.3                  |
| M   | Thyroid                        | Stomach                          | 12333          | 14                            | 1.4                               | 0.03                                  | 9.8                           | 1.43 (0.78 to 2.4)      | 49.8            | 74.2                  |
| M   | Thyroid                        | Urinary Bladder                  | 12333          | 11                            | 1.1                               | 0.03                                  | 14.8                          | 0.75 (0.37 to 1.33)     | 49.8            | 75.3                  |
| M   | Urinary Bladder                | Acute Lymphocytic Leukemia       | 51094          | 6                             | 0.2                               | 0.01                                  | 4.8                           | 1.25 (0.46 to 2.72)     | 65.7            | 73.1                  |
| M   | Urinary Bladder                | Acute Non-lymphocytic Leukemia   | 51094          | 120                           | 3.5                               | 0.27                                  | 83.2                          | 1.44 (1.2 to 1.73)      | 65.7            | 78.8                  |
| M   | Urinary Bladder                | Bones and Joints                 | 51094          | 6                             | 0.2                               | 0.01                                  | 6.2                           | 0.97 (0.35 to 2.1)      | 65.7            | 79.2                  |
| M   | Urinary Bladder                | Brain and Other Nervous System   | 51094          | 93                            | 2.7                               | 0.21                                  | 69.5                          | 1.34 (1.08 to 1.64)     | 65.7            | 75.1                  |
| M   | Urinary Bladder                | Chronic Myeloid Leukemia         | 51094          | 9                             | 0.3                               | 0.02                                  | 8.4                           | 1.07 (0.49 to 2.03)     | 65.7            | 76.8                  |
| M   | Urinary Bladder                | Colon and Rectum                 | 51094          | 319                           | 9.2                               | 0.73                                  | 338.1                         | 0.94 (0.84 to 1.05)     | 65.7            | 78.9                  |
| M   | Urinary Bladder                | Esophagus                        | 51094          | 157                           | 4.5                               | 0.36                                  | 122.1                         | 1.29 (1.09 to 1.5)      | 65.7            | 75.9                  |
| M   | Urinary Bladder                | Gallbladder and Other Biliary    | 51094          | 18                            | 0.5                               | 0.04                                  | 19.5                          | 0.92 (0.55 to 1.46)     | 65.7            | 78.3                  |
| M   | Urinary Bladder                | Kidney and Renal Pelvis          | 51094          | 182                           | 5.2                               | 0.41                                  | 98.3                          | 1.85 (1.59 to 2.14)     | 65.7            | 76.2                  |
| M   | Urinary Bladder                | Larynx                           | 51094          | 32                            | 0.9                               | 0.07                                  | 31.5                          | 1.02 (0.7 to 1.44)      | 65.7            | 75.8                  |
| M   | Urinary Bladder                | Liver and Intrahepatic Bile Duct | 51094          | 178                           | 5.1                               | 0.40                                  | 130.6                         | 1.36 (1.17 to 1.58)     | 65.7            | 76.4                  |
| M   | Urinary Bladder                | Lung and Bronchus                | 51094          | 1789                          | 51.6                              | 4.07                                  | 1088.6                        | 1.64 (1.57 to 1.72)     | 65.7            | 77.2                  |
| M   | Urinary Bladder                | Melanoma of the Skin             | 51094          | 56                            | 1.6                               | 0.13                                  | 65.8                          | 0.85 (0.64 to 1.11)     | 65.7            | 78.5                  |
| M   | Urinary Bladder                | Myeloma                          | 51094          | 94                            | 2.7                               | 0.21                                  | 81.8                          | 1.15 (0.93 to 1.41)     | 65.7            | 78.3                  |
| M   | Urinary Bladder                | Non-Hodgkin Lymphoma             | 51094          | 169                           | 4.9                               | 0.38                                  | 199.4                         | 0.85 (0.73 to 0.99)     | 65.7            | 79.4                  |
| M   | Urinary Bladder                | Oral Cavity and Pharynx          | 51094          | 56                            | 1.6                               | 0.13                                  | 57.5                          | 0.97 (0.74 to 1.26)     | 65.7            | 76.0                  |
| M   | Urinary Bladder                | Pancreas                         | 51094          | 255                           | 7.4                               | 0.58                                  | 221.7                         | 1.15 (1.01 to 1.3)      | 65.7            | 78.0                  |
| M   | Urinary Bladder                | Prostate                         | 51094          | 352                           | 10.2                              | 0.80                                  | 489.6                         | 0.72 (0.65 to 0.8)      | 65.7            | 80.9                  |
| M   | Urinary Bladder                | Small Intestine                  | 51094          | 6                             | 0.2                               | 0.01                                  | 8.0                           | 0.75 (0.28 to 1.63)     | 65.7            | 80.4                  |
| M   | Urinary Bladder                | Soft Tissue including Heart      | 51094          | 24                            | 0.7                               | 0.05                                  | 21.7                          | 1.11 (0.71 to 1.65)     | 65.7            | 72.4                  |
| M   | Urinary Bladder                | Stomach                          | 51094          | 93                            | 2.7                               | 0.21                                  | 80.7                          | 1.15 (0.93 to 1.41)     | 65.7            | 78.0                  |
| M   | Urinary Bladder                | Thyroid                          | 51094          | 11                            | 0.3                               | 0.03                                  | 9.0                           | 1.22 (0.61 to 2.18)     | 65.7            | 76.6                  |
| W   | Acute Lymphocytic Leukemia     | Acute Non-lymphocytic Leukemia   | 483            | 5                             | 14.0                              | 0.02                                  | 0.1                           | 45.42 (14.75 to 105.99) | 41.2            | 53.9                  |
| W   | Acute Non-Lymphocytic Leukemia | Breast                           | 1850           | 6                             | 4.1                               | 0.02                                  | 5.9                           | 1.02 (0.37 to 2.22)     | 46.9            | 65.7                  |
| W   | Acute Non-Lymphocytic Leukemia | Liver and Intrahepatic Bile Duct | 1850           | 5                             | 3.4                               | 0.02                                  | 1.1                           | 4.57 (1.48 to 10.67)    | 46.9            | 76.6                  |
| W   | Acute Non-Lymphocytic Leukemia | Lung and Bronchus                | 1850           | 15                            | 10.3                              | 0.05                                  | 10.5                          | 1.43 (0.8 to 2.36)      | 46.9            | 70.6                  |
| W   | Anus, Anal Canal and Anorectum | Acute Non-lymphocytic Leukemia   | 3027           | 7                             | 3.4                               | 0.03                                  | 2.0                           | 3.55 (1.43 to 7.32)     | 59.8            | 70.3                  |
| W   | Anus, Anal Canal and Anorectum | Breast                           | 3027           | 10                            | 4.9                               | 0.04                                  | 15.2                          | 0.66 (0.32 to 1.21)     | 59.8            | 78.3                  |

| Sex | First Primary Cancer (FPC)     | Subsequent Primary Cancer (SPC)  | Survivors, No. | Observed Number of SPC Deaths | Mortality per 10,000 person-years | % Contribution to the Total Mortality | Expected Number of SPC Deaths | SMR (95% CI)            | Mean Age at FPC | Mean Age at SPC Death |
|-----|--------------------------------|----------------------------------|----------------|-------------------------------|-----------------------------------|---------------------------------------|-------------------------------|-------------------------|-----------------|-----------------------|
| W   | Anus, Anal Canal and Anorectum | Colon and Rectum                 | 3027           | 115                           | 55.8                              | 0.41                                  | 10.6                          | 10.87 (8.97 to 13.04)   | 59.8            | 71.8                  |
| W   | Anus, Anal Canal and Anorectum | Corpus and Uterus, NOS           | 3027           | 23                            | 11.2                              | 0.08                                  | 3.5                           | 6.5 (4.12 to 9.76)      | 59.8            | 75.1                  |
| W   | Anus, Anal Canal and Anorectum | Liver and Intrahepatic Bile Duct | 3027           | 6                             | 2.9                               | 0.02                                  | 2.9                           | 2.07 (0.76 to 4.49)     | 59.8            | 77.2                  |
| W   | Anus, Anal Canal and Anorectum | Lung and Bronchus                | 3027           | 60                            | 29.1                              | 0.22                                  | 29.7                          | 2.02 (1.54 to 2.6)      | 59.8            | 72.3                  |
| W   | Anus, Anal Canal and Anorectum | Non-Hodgkin Lymphoma             | 3027           | 11                            | 5.3                               | 0.04                                  | 4.9                           | 2.24 (1.12 to 4.01)     | 59.8            | 72.8                  |
| W   | Anus, Anal Canal and Anorectum | Ovary                            | 3027           | 9                             | 4.4                               | 0.03                                  | 5.8                           | 1.55 (0.71 to 2.94)     | 59.8            | 75.2                  |
| W   | Anus, Anal Canal and Anorectum | Pancreas                         | 3027           | 13                            | 6.3                               | 0.05                                  | 7.9                           | 1.64 (0.87 to 2.8)      | 59.8            | 72.3                  |
| W   | Anus, Anal Canal and Anorectum | Vulva and Other Genital Organs   | 3027           | 5                             | 2.4                               | 0.02                                  | 0.8                           | 6.16 (2 to 14.38)       | 59.8            | 56.1                  |
| W   | Bones and Joints               | Brain and Other Nervous System   | 1237           | 15                            | 13.9                              | 0.05                                  | 0.7                           | 20.78 (11.63 to 34.28)  | 45.5            | 61.6                  |
| W   | Bones and Joints               | Lung and Bronchus                | 1237           | 11                            | 10.2                              | 0.04                                  | 7.8                           | 1.41 (0.7 to 2.53)      | 45.5            | 71.2                  |
| W   | Bones and Joints               | Soft Tissue including Heart      | 1237           | 10                            | 9.2                               | 0.04                                  | 0.2                           | 45.94 (22.03 to 84.48)  | 45.5            | 52.6                  |
| W   | Brain and Other Nervous System | Bones and Joints                 | 4105           | 6                             | 1.9                               | 0.02                                  | 0.1                           | 51.85 (19.03 to 112.85) | 42.8            | 47.4                  |
| W   | Brain and Other Nervous System | Breast                           | 4105           | 10                            | 3.2                               | 0.04                                  | 10.2                          | 0.98 (0.47 to 1.8)      | 42.8            | 57.6                  |
| W   | Brain and Other Nervous System | Lung and Bronchus                | 4105           | 24                            | 7.8                               | 0.09                                  | 16.3                          | 1.48 (0.95 to 2.2)      | 42.8            | 65.2                  |
| W   | Brain and Other Nervous System | Non-Hodgkin Lymphoma             | 4105           | 6                             | 1.9                               | 0.02                                  | 2.1                           | 2.8 (1.03 to 6.08)      | 42.8            | 67.9                  |
| W   | Brain and Other Nervous System | Pancreas                         | 4105           | 5                             | 1.6                               | 0.02                                  | 4.0                           | 1.25 (0.41 to 2.92)     | 42.8            | 76.7                  |
| W   | Brain and Other Nervous System | Soft Tissue including Heart      | 4105           | 10                            | 3.2                               | 0.04                                  | 0.5                           | 19.69 (9.44 to 36.21)   | 42.8            | 67.8                  |
| W   | Breast                         | Acute Lymphocytic Leukemia       | 332998         | 40                            | 0.2                               | 0.14                                  | 20.3                          | 1.97 (1.41 to 2.69)     | 58.8            | 69.4                  |
| W   | Breast                         | Acute Non-lymphocytic Leukemia   | 332998         | 433                           | 1.6                               | 1.56                                  | 250.0                         | 1.73 (1.57 to 1.9)      | 58.8            | 73.7                  |
| W   | Breast                         | Anus, Anal Canal and Anorectum   | 332998         | 18                            | 0.1                               | 0.06                                  | 22.7                          | 0.79 (0.47 to 1.25)     | 58.8            | 72.9                  |
| W   | Breast                         | Bones and Joints                 | 332998         | 40                            | 0.2                               | 0.14                                  | 22.5                          | 1.78 (1.27 to 2.42)     | 58.8            | 75.5                  |
| W   | Breast                         | Brain and Other Nervous System   | 332998         | 301                           | 1.1                               | 1.09                                  | 286.4                         | 1.05 (0.94 to 1.18)     | 58.8            | 72.5                  |
| W   | Breast                         | Cervix Uteri                     | 332998         | 70                            | 0.3                               | 0.25                                  | 138.4                         | 0.51 (0.39 to 0.64)     | 58.8            | 70.5                  |
| W   | Breast                         | Chronic Myeloid Leukemia         | 332998         | 15                            | 0.1                               | 0.05                                  | 25.3                          | 0.59 (0.33 to 0.98)     | 58.8            | 74.8                  |
| W   | Breast                         | Colon and Rectum                 | 332998         | 1118                          | 4.3                               | 4.03                                  | 1321.0                        | 0.85 (0.8 to 0.9)       | 58.8            | 77.1                  |
| W   | Breast                         | Corpus and Uterus, NOS           | 332998         | 725                           | 2.8                               | 2.62                                  | 433.7                         | 1.67 (1.55 to 1.8)      | 58.8            | 74.4                  |
| W   | Breast                         | Esophagus                        | 332998         | 187                           | 0.7                               | 0.67                                  | 155.8                         | 1.2 (1.04 to 1.39)      | 58.8            | 75.3                  |
| W   | Breast                         | Eye and Orbit                    | 332998         | 8                             | 0.0                               | 0.03                                  | 6.5                           | 1.23 (0.53 to 2.42)     | 58.8            | 68.9                  |
| W   | Breast                         | Gallbladder and Other Biliary    | 332998         | 118                           | 0.4                               | 0.43                                  | 121.8                         | 0.97 (0.8 to 1.16)      | 58.8            | 76.3                  |
| W   | Breast                         | Hodgkin Lymphoma                 | 332998         | 18                            | 0.1                               | 0.06                                  | 21.4                          | 0.84 (0.5 to 1.33)      | 58.8            | 77.2                  |
| W   | Breast                         | Kidney and Renal Pelvis          | 332998         | 199                           | 0.8                               | 0.72                                  | 251.8                         | 0.79 (0.68 to 0.91)     | 58.8            | 75.9                  |
| W   | Breast                         | Larynx                           | 332998         | 28                            | 0.1                               | 0.10                                  | 38.4                          | 0.73 (0.49 to 1.05)     | 58.8            | 73.7                  |

| Sex | First Primary Cancer (FPC) | Subsequent Primary Cancer (SPC)  | Survivors, No. | Observed Number of SPC Deaths | Mortality per 10,000 person-years | % Contribution to the Total Mortality | Expected Number of SPC Deaths | SMR (95% CI)        | Mean Age at FPC | Mean Age at SPC Death |
|-----|----------------------------|----------------------------------|----------------|-------------------------------|-----------------------------------|---------------------------------------|-------------------------------|---------------------|-----------------|-----------------------|
| W   | Breast                     | Liver and Intrahepatic Bile Duct | 332998         | 427                           | 1.6                               | 1.54                                  | 375.6                         | 1.14 (1.03 to 1.25) | 58.8            | 75.6                  |
| W   | Breast                     | Lung and Bronchus                | 332998         | 3815                          | 14.5                              | 13.76                                 | 3754.0                        | 1.02 (0.98 to 1.05) | 58.8            | 74.7                  |
| W   | Breast                     | Melanoma of the Skin             | 332998         | 113                           | 0.4                               | 0.41                                  | 138.2                         | 0.82 (0.67 to 0.98) | 58.8            | 74.4                  |
| W   | Breast                     | Myeloma                          | 332998         | 241                           | 0.9                               | 0.87                                  | 286.3                         | 0.84 (0.74 to 0.96) | 58.8            | 76.4                  |
| W   | Breast                     | Non-Hodgkin Lymphoma             | 332998         | 557                           | 2.1                               | 2.01                                  | 618.5                         | 0.9 (0.83 to 0.98)  | 58.8            | 77.6                  |
| W   | Breast                     | Oral Cavity and Pharynx          | 332998         | 138                           | 0.5                               | 0.50                                  | 134.4                         | 1.03 (0.86 to 1.21) | 58.8            | 76.0                  |
| W   | Breast                     | Ovary                            | 332998         | 984                           | 3.7                               | 3.55                                  | 730.6                         | 1.35 (1.26 to 1.43) | 58.8            | 71.7                  |
| W   | Breast                     | Pancreas                         | 332998         | 1277                          | 4.9                               | 4.61                                  | 994.8                         | 1.28 (1.21 to 1.36) | 58.8            | 75.9                  |
| W   | Breast                     | Small Intestine                  | 332998         | 39                            | 0.1                               | 0.14                                  | 29.8                          | 1.31 (0.93 to 1.79) | 58.8            | 73.6                  |
| W   | Breast                     | Soft Tissue including Heart      | 332998         | 160                           | 0.6                               | 0.58                                  | 87.7                          | 1.82 (1.55 to 2.13) | 58.8            | 71.7                  |
| W   | Breast                     | Stomach                          | 332998         | 306                           | 1.2                               | 1.10                                  | 241.8                         | 1.27 (1.13 to 1.42) | 58.8            | 75.1                  |
| W   | Breast                     | Thyroid                          | 332998         | 47                            | 0.2                               | 0.17                                  | 52.0                          | 0.9 (0.66 to 1.2)   | 58.8            | 77.7                  |
| W   | Breast                     | Urinary Bladder                  | 332998         | 194                           | 0.7                               | 0.70                                  | 238.2                         | 0.81 (0.7 to 0.94)  | 58.8            | 78.7                  |
| W   | Breast                     | Vulva and Other Genital Organs   | 332998         | 79                            | 0.3                               | 0.28                                  | 99.7                          | 0.79 (0.63 to 0.99) | 58.8            | 76.9                  |
| W   | Cervix Uteri               | Acute Non-lymphocytic Leukemia   | 19943          | 13                            | 0.7                               | 0.05                                  | 8.3                           | 1.57 (0.84 to 2.69) | 46.4            | 61.7                  |
| W   | Cervix Uteri               | Brain and Other Nervous System   | 19943          | 14                            | 0.7                               | 0.05                                  | 11.6                          | 1.21 (0.66 to 2.03) | 46.4            | 68.4                  |
| W   | Cervix Uteri               | Breast                           | 19943          | 70                            | 3.7                               | 0.25                                  | 77.0                          | 0.91 (0.71 to 1.15) | 46.4            | 63.2                  |
| W   | Cervix Uteri               | Colon and Rectum                 | 19943          | 87                            | 4.6                               | 0.31                                  | 43.6                          | 2 (1.6 to 2.46)     | 46.4            | 68.8                  |
| W   | Cervix Uteri               | Corpus and Uterus, NOS           | 19943          | 89                            | 4.7                               | 0.32                                  | 16.4                          | 5.44 (4.37 to 6.7)  | 46.4            | 67.6                  |
| W   | Cervix Uteri               | Esophagus                        | 19943          | 6                             | 0.3                               | 0.02                                  | 5.2                           | 1.14 (0.42 to 2.49) | 46.4            | 71.3                  |
| W   | Cervix Uteri               | Gallbladder and Other Biliary    | 19943          | 9                             | 0.5                               | 0.03                                  | 4.1                           | 2.18 (1 to 4.13)    | 46.4            | 70.4                  |
| W   | Cervix Uteri               | Kidney and Renal Pelvis          | 19943          | 10                            | 0.5                               | 0.04                                  | 8.2                           | 1.22 (0.59 to 2.25) | 46.4            | 68.7                  |
| W   | Cervix Uteri               | Liver and Intrahepatic Bile Duct | 19943          | 17                            | 0.9                               | 0.06                                  | 14.3                          | 1.19 (0.69 to 1.91) | 46.4            | 66.5                  |
| W   | Cervix Uteri               | Lung and Bronchus                | 19943          | 316                           | 16.8                              | 1.14                                  | 126.5                         | 2.5 (2.23 to 2.79)  | 46.4            | 67.3                  |
| W   | Cervix Uteri               | Melanoma of the Skin             | 19943          | 5                             | 0.3                               | 0.02                                  | 5.1                           | 0.98 (0.32 to 2.29) | 46.4            | 62.7                  |
| W   | Cervix Uteri               | Myeloma                          | 19943          | 12                            | 0.6                               | 0.04                                  | 9.1                           | 1.31 (0.68 to 2.29) | 46.4            | 73.4                  |
| W   | Cervix Uteri               | Non-Hodgkin Lymphoma             | 19943          | 21                            | 1.1                               | 0.08                                  | 17.3                          | 1.21 (0.75 to 1.85) | 46.4            | 75.0                  |
| W   | Cervix Uteri               | Oral Cavity and Pharynx          | 19943          | 7                             | 0.4                               | 0.03                                  | 4.8                           | 1.46 (0.59 to 3.01) | 46.4            | 68.1                  |
| W   | Cervix Uteri               | Ovary                            | 19943          | 50                            | 2.7                               | 0.18                                  | 26.9                          | 1.86 (1.38 to 2.45) | 46.4            | 63.4                  |
| W   | Cervix Uteri               | Pancreas                         | 19943          | 37                            | 2.0                               | 0.13                                  | 32.7                          | 1.13 (0.8 to 1.56)  | 46.4            | 70.8                  |
| W   | Cervix Uteri               | Soft Tissue including Heart      | 19943          | 18                            | 1.0                               | 0.06                                  | 3.7                           | 4.82 (2.86 to 7.62) | 46.4            | 62.0                  |
| W   | Cervix Uteri               | Stomach                          | 19943          | 26                            | 1.4                               | 0.09                                  | 9.5                           | 2.74 (1.79 to 4.01) | 46.4            | 68.2                  |

| Sex | First Primary Cancer (FPC) | Subsequent Primary Cancer (SPC)  | Survivors, No. | Observed Number of SPC Deaths | Mortality per 10,000 person-years | % Contribution to the Total Mortality | Expected Number of SPC Deaths | SMR (95% CI)          | Mean Age at FPC | Mean Age at SPC Death |
|-----|----------------------------|----------------------------------|----------------|-------------------------------|-----------------------------------|---------------------------------------|-------------------------------|-----------------------|-----------------|-----------------------|
| W   | Cervix Uteri               | Urinary Bladder                  | 19943          | 19                            | 1.0                               | 0.07                                  | 6.4                           | 2.98 (1.8 to 4.66)    | 46.4            | 72.7                  |
| W   | Cervix Uteri               | Vulva and Other Genital Organs   | 19943          | 24                            | 1.3                               | 0.09                                  | 3.2                           | 7.58 (4.86 to 11.28)  | 46.4            | 67.3                  |
| W   | Chronic Myeloid Leukemia   | Breast                           | 1930           | 5                             | 4.0                               | 0.02                                  | 6.4                           | 0.79 (0.26 to 1.83)   | 53.5            | 65.8                  |
| W   | Chronic Myeloid Leukemia   | Colon and Rectum                 | 1930           | 9                             | 7.3                               | 0.03                                  | 4.0                           | 2.27 (1.04 to 4.31)   | 53.5            | 79.8                  |
| W   | Chronic Myeloid Leukemia   | Lung and Bronchus                | 1930           | 14                            | 11.3                              | 0.05                                  | 11.9                          | 1.18 (0.65 to 1.98)   | 53.5            | 74.1                  |
| W   | Chronic Myeloid Leukemia   | Non-Hodgkin Lymphoma             | 1930           | 18                            | 14.5                              | 0.06                                  | 1.8                           | 10.15 (6.01 to 16.03) | 53.5            | 72.7                  |
| W   | Chronic Myeloid Leukemia   | Ovary                            | 1930           | 5                             | 4.0                               | 0.02                                  | 2.4                           | 2.11 (0.68 to 4.91)   | 53.5            | 74.6                  |
| W   | Colon and Rectum           | Acute Lymphocytic Leukemia       | 68385          | 7                             | 0.1                               | 0.03                                  | 4.3                           | 1.62 (0.65 to 3.34)   | 65.1            | 78.4                  |
| W   | Colon and Rectum           | Acute Non-lymphocytic Leukemia   | 68385          | 65                            | 1.4                               | 0.23                                  | 59.4                          | 1.1 (0.85 to 1.4)     | 65.1            | 78.2                  |
| W   | Colon and Rectum           | Bones and Joints                 | 68385          | 8                             | 0.2                               | 0.03                                  | 5.5                           | 1.46 (0.63 to 2.88)   | 65.1            | 76.3                  |
| W   | Colon and Rectum           | Brain and Other Nervous System   | 68385          | 72                            | 1.5                               | 0.26                                  | 58.2                          | 1.24 (0.97 to 1.56)   | 65.1            | 79.1                  |
| W   | Colon and Rectum           | Breast                           | 68385          | 290                           | 6.2                               | 1.05                                  | 423.5                         | 0.69 (0.61 to 0.77)   | 65.1            | 77.6                  |
| W   | Colon and Rectum           | Cervix Uteri                     | 68385          | 23                            | 0.5                               | 0.08                                  | 27.7                          | 0.83 (0.53 to 1.25)   | 65.1            | 72.4                  |
| W   | Colon and Rectum           | Chronic Myeloid Leukemia         | 68385          | 10                            | 0.2                               | 0.04                                  | 6.7                           | 1.5 (0.72 to 2.75)    | 65.1            | 81.1                  |
| W   | Colon and Rectum           | Corpus and Uterus, NOS           | 68385          | 146                           | 3.1                               | 0.53                                  | 97.5                          | 1.5 (1.27 to 1.76)    | 65.1            | 75.7                  |
| W   | Colon and Rectum           | Esophagus                        | 68385          | 46                            | 1.0                               | 0.17                                  | 37.2                          | 1.24 (0.91 to 1.65)   | 65.1            | 77.7                  |
| W   | Colon and Rectum           | Gallbladder and Other Biliary    | 68385          | 33                            | 0.7                               | 0.12                                  | 30.4                          | 1.09 (0.75 to 1.53)   | 65.1            | 77.2                  |
| W   | Colon and Rectum           | Kidney and Renal Pelvis          | 68385          | 55                            | 1.2                               | 0.20                                  | 60.3                          | 0.91 (0.69 to 1.19)   | 65.1            | 77.1                  |
| W   | Colon and Rectum           | Larynx                           | 68385          | 6                             | 0.1                               | 0.02                                  | 8.3                           | 0.73 (0.27 to 1.58)   | 65.1            | 73.6                  |
| W   | Colon and Rectum           | Liver and Intrahepatic Bile Duct | 68385          | 111                           | 2.4                               | 0.40                                  | 90.1                          | 1.23 (1.01 to 1.48)   | 65.1            | 76.6                  |
| W   | Colon and Rectum           | Lung and Bronchus                | 68385          | 997                           | 21.3                              | 3.60                                  | 837.3                         | 1.19 (1.12 to 1.27)   | 65.1            | 78.4                  |
| W   | Colon and Rectum           | Melanoma of the Skin             | 68385          | 33                            | 0.7                               | 0.12                                  | 30.5                          | 1.08 (0.74 to 1.52)   | 65.1            | 79.5                  |
| W   | Colon and Rectum           | Myeloma                          | 68385          | 80                            | 1.7                               | 0.29                                  | 72.3                          | 1.11 (0.88 to 1.38)   | 65.1            | 78.4                  |
| W   | Colon and Rectum           | Non-Hodgkin Lymphoma             | 68385          | 152                           | 3.3                               | 0.55                                  | 161.2                         | 0.94 (0.8 to 1.11)    | 65.1            | 81.2                  |
| W   | Colon and Rectum           | Oral Cavity and Pharynx          | 68385          | 26                            | 0.6                               | 0.09                                  | 32.1                          | 0.81 (0.53 to 1.19)   | 65.1            | 76.2                  |
| W   | Colon and Rectum           | Ovary                            | 68385          | 156                           | 3.3                               | 0.56                                  | 161.1                         | 0.97 (0.82 to 1.13)   | 65.1            | 76.4                  |
| W   | Colon and Rectum           | Pancreas                         | 68385          | 292                           | 6.2                               | 1.05                                  | 241.9                         | 1.21 (1.07 to 1.35)   | 65.1            | 79.3                  |
| W   | Colon and Rectum           | Small Intestine                  | 68385          | 23                            | 0.5                               | 0.08                                  | 7.2                           | 3.2 (2.03 to 4.81)    | 65.1            | 76.3                  |
| W   | Colon and Rectum           | Soft Tissue including Heart      | 68385          | 38                            | 0.8                               | 0.14                                  | 19.2                          | 1.98 (1.4 to 2.72)    | 65.1            | 73.6                  |
| W   | Colon and Rectum           | Stomach                          | 68385          | 104                           | 2.2                               | 0.38                                  | 64.7                          | 1.61 (1.31 to 1.95)   | 65.1            | 76.7                  |
| W   | Colon and Rectum           | Thyroid                          | 68385          | 15                            | 0.3                               | 0.05                                  | 13.1                          | 1.15 (0.64 to 1.89)   | 65.1            | 78.7                  |
| W   | Colon and Rectum           | Urinary Bladder                  | 68385          | 67                            | 1.4                               | 0.24                                  | 64.6                          | 1.04 (0.8 to 1.32)    | 65.1            | 79.5                  |

| Sex | First Primary Cancer (FPC) | Subsequent Primary Cancer (SPC)  | Survivors, No. | Observed Number of SPC Deaths | Mortality per 10,000 person-years | % Contribution to the Total Mortality | Expected Number of SPC Deaths | SMR (95% CI)          | Mean Age at FPC | Mean Age at SPC Death |
|-----|----------------------------|----------------------------------|----------------|-------------------------------|-----------------------------------|---------------------------------------|-------------------------------|-----------------------|-----------------|-----------------------|
| W   | Colon and Rectum           | Vulva and Other Genital Organs   | 68385          | 24                            | 0.5                               | 0.09                                  | 24.1                          | 1 (0.64 to 1.49)      | 65.1            | 79.8                  |
| W   | Corpus and Uterus, NOS     | Acute Lymphocytic Leukemia       | 62541          | 6                             | 0.1                               | 0.02                                  | 4.1                           | 1.47 (0.54 to 3.19)   | 60.3            | 71.2                  |
| W   | Corpus and Uterus, NOS     | Acute Non-lymphocytic Leukemia   | 62541          | 87                            | 1.8                               | 0.31                                  | 52.4                          | 1.66 (1.33 to 2.05)   | 60.3            | 74.0                  |
| W   | Corpus and Uterus, NOS     | Bones and Joints                 | 62541          | 12                            | 0.2                               | 0.04                                  | 4.6                           | 2.61 (1.35 to 4.55)   | 60.3            | 73.5                  |
| W   | Corpus and Uterus, NOS     | Brain and Other Nervous System   | 62541          | 70                            | 1.4                               | 0.25                                  | 58.9                          | 1.19 (0.93 to 1.5)    | 60.3            | 71.3                  |
| W   | Corpus and Uterus, NOS     | Breast                           | 62541          | 301                           | 6.1                               | 1.09                                  | 380.1                         | 0.79 (0.71 to 0.89)   | 60.3            | 75.7                  |
| W   | Corpus and Uterus, NOS     | Chronic Myeloid Leukemia         | 62541          | 6                             | 0.1                               | 0.02                                  | 5.3                           | 1.14 (0.42 to 2.48)   | 60.3            | 75.7                  |
| W   | Corpus and Uterus, NOS     | Colon and Rectum                 | 62541          | 355                           | 7.2                               | 1.28                                  | 271.0                         | 1.31 (1.18 to 1.45)   | 60.3            | 75.3                  |
| W   | Corpus and Uterus, NOS     | Esophagus                        | 62541          | 33                            | 0.7                               | 0.12                                  | 32.1                          | 1.03 (0.71 to 1.44)   | 60.3            | 73.6                  |
| W   | Corpus and Uterus, NOS     | Gallbladder and Other Biliary    | 62541          | 26                            | 0.5                               | 0.09                                  | 25.1                          | 1.04 (0.68 to 1.52)   | 60.3            | 72.6                  |
| W   | Corpus and Uterus, NOS     | Hodgkin Lymphoma                 | 62541          | 6                             | 0.1                               | 0.02                                  | 4.5                           | 1.35 (0.49 to 2.93)   | 60.3            | 72.3                  |
| W   | Corpus and Uterus, NOS     | Kidney and Renal Pelvis          | 62541          | 52                            | 1.1                               | 0.19                                  | 52.4                          | 0.99 (0.74 to 1.3)    | 60.3            | 72.5                  |
| W   | Corpus and Uterus, NOS     | Liver and Intrahepatic Bile Duct | 62541          | 91                            | 1.8                               | 0.33                                  | 75.9                          | 1.2 (0.97 to 1.47)    | 60.3            | 75.4                  |
| W   | Corpus and Uterus, NOS     | Lung and Bronchus                | 62541          | 621                           | 12.6                              | 2.24                                  | 786.5                         | 0.79 (0.73 to 0.85)   | 60.3            | 76.0                  |
| W   | Corpus and Uterus, NOS     | Melanoma of the Skin             | 62541          | 32                            | 0.6                               | 0.12                                  | 28.7                          | 1.11 (0.76 to 1.57)   | 60.3            | 74.7                  |
| W   | Corpus and Uterus, NOS     | Myeloma                          | 62541          | 61                            | 1.2                               | 0.22                                  | 58.9                          | 1.04 (0.79 to 1.33)   | 60.3            | 75.5                  |
| W   | Corpus and Uterus, NOS     | Non-Hodgkin Lymphoma             | 62541          | 129                           | 2.6                               | 0.47                                  | 131.0                         | 0.99 (0.82 to 1.17)   | 60.3            | 77.0                  |
| W   | Corpus and Uterus, NOS     | Oral Cavity and Pharynx          | 62541          | 24                            | 0.5                               | 0.09                                  | 27.6                          | 0.87 (0.56 to 1.3)    | 60.3            | 77.3                  |
| W   | Corpus and Uterus, NOS     | Pancreas                         | 62541          | 231                           | 4.7                               | 0.83                                  | 205.5                         | 1.12 (0.98 to 1.28)   | 60.3            | 74.8                  |
| W   | Corpus and Uterus, NOS     | Small Intestine                  | 62541          | 14                            | 0.3                               | 0.05                                  | 6.1                           | 2.31 (1.26 to 3.88)   | 60.3            | 71.1                  |
| W   | Corpus and Uterus, NOS     | Soft Tissue including Heart      | 62541          | 111                           | 2.3                               | 0.40                                  | 17.6                          | 6.31 (5.19 to 7.59)   | 60.3            | 65.6                  |
| W   | Corpus and Uterus, NOS     | Stomach                          | 62541          | 65                            | 1.3                               | 0.23                                  | 48.0                          | 1.35 (1.05 to 1.73)   | 60.3            | 77.2                  |
| W   | Corpus and Uterus, NOS     | Thyroid                          | 62541          | 9                             | 0.2                               | 0.03                                  | 10.6                          | 0.85 (0.39 to 1.61)   | 60.3            | 81.7                  |
| W   | Corpus and Uterus, NOS     | Urinary Bladder                  | 62541          | 72                            | 1.5                               | 0.26                                  | 49.9                          | 1.44 (1.13 to 1.82)   | 60.3            | 77.8                  |
| W   | Esophagus                  | Colon and Rectum                 | 845            | 6                             | 13.0                              | 0.02                                  | 3.0                           | 1.98 (0.73 to 4.32)   | 65.0            | 74.9                  |
| W   | Esophagus                  | Lung and Bronchus                | 845            | 36                            | 78.0                              | 0.13                                  | 8.3                           | 4.33 (3.04 to 6)      | 65.0            | 73.6                  |
| W   | Esophagus                  | Oral Cavity and Pharynx          | 845            | 5                             | 10.8                              | 0.02                                  | 0.3                           | 16.94 (5.5 to 39.52)  | 65.0            | 72.5                  |
| W   | Esophagus                  | Stomach                          | 845            | 6                             | 13.0                              | 0.02                                  | 0.6                           | 10.65 (3.91 to 23.19) | 65.0            | 74.3                  |
| W   | Eye and Orbit              | Breast                           | 1349           | 11                            | 11.0                              | 0.04                                  | 6.8                           | 1.61 (0.8 to 2.88)    | 58.0            | 78.6                  |
| W   | Eye and Orbit              | Colon and Rectum                 | 1349           | 9                             | 9.0                               | 0.03                                  | 4.7                           | 1.91 (0.87 to 3.62)   | 58.0            | 79.9                  |
| W   | Eye and Orbit              | Liver and Intrahepatic Bile Duct | 1349           | 12                            | 12.0                              | 0.04                                  | 1.2                           | 9.68 (5 to 16.91)     | 58.0            | 74.8                  |
| W   | Eye and Orbit              | Lung and Bronchus                | 1349           | 14                            | 14.0                              | 0.05                                  | 13.8                          | 1.01 (0.55 to 1.7)    | 58.0            | 76.0                  |



| Sex | First Primary Cancer (FPC)    | Subsequent Primary Cancer (SPC)  | Survivors, No. | Observed Number of SPC Deaths | Mortality per 10,000 person-years | % Contribution to the Total Mortality | Expected Number of SPC Deaths | SMR (95% CI)              | Mean Age at FPC | Mean Age at SPC Death |
|-----|-------------------------------|----------------------------------|----------------|-------------------------------|-----------------------------------|---------------------------------------|-------------------------------|---------------------------|-----------------|-----------------------|
| W   | Eye and Orbit                 | Melanoma of the Skin             | 1349           | 118                           | 118.4                             | 0.43                                  | 0.6                           | 212.86 (176.19 to 254.91) | 58.0            | 69.7                  |
| W   | Eye and Orbit                 | Ovary                            | 1349           | 5                             | 5.0                               | 0.02                                  | 2.7                           | 1.85 (0.6 to 4.33)        | 58.0            | 72.7                  |
| W   | Gallbladder and Other Biliary | Breast                           | 1308           | 8                             | 9.8                               | 0.03                                  | 6.8                           | 1.17 (0.51 to 2.31)       | 64.5            | 71.4                  |
| W   | Gallbladder and Other Biliary | Colon and Rectum                 | 1308           | 9                             | 11.1                              | 0.03                                  | 5.5                           | 1.65 (0.75 to 3.12)       | 64.5            | 81.8                  |
| W   | Gallbladder and Other Biliary | Liver and Intrahepatic Bile Duct | 1308           | 53                            | 65.2                              | 0.19                                  | 1.6                           | 32.89 (24.64 to 43.02)    | 64.5            | 73.4                  |
| W   | Gallbladder and Other Biliary | Lung and Bronchus                | 1308           | 27                            | 33.2                              | 0.10                                  | 14.0                          | 1.92 (1.27 to 2.8)        | 64.5            | 75.5                  |
| W   | Gallbladder and Other Biliary | Ovary                            | 1308           | 10                            | 12.3                              | 0.04                                  | 2.7                           | 3.74 (1.79 to 6.88)       | 64.5            | 78.0                  |
| W   | Gallbladder and Other Biliary | Pancreas                         | 1308           | 55                            | 67.7                              | 0.20                                  | 4.0                           | 13.79 (10.39 to 17.95)    | 64.5            | 72.5                  |
| W   | Gallbladder and Other Biliary | Stomach                          | 1308           | 5                             | 6.2                               | 0.02                                  | 1.1                           | 4.53 (1.47 to 10.57)      | 64.5            | 78.9                  |
| W   | Gallbladder and Other Biliary | Urinary Bladder                  | 1308           | 8                             | 9.8                               | 0.03                                  | 1.0                           | 7.88 (3.4 to 15.53)       | 64.5            | 77.2                  |
| W   | Hodgkin Lymphoma              | Acute Non-lymphocytic Leukemia   | 6223           | 14                            | 2.4                               | 0.05                                  | 1.7                           | 8.36 (4.57 to 14.02)      | 38.6            | 52.2                  |
| W   | Hodgkin Lymphoma              | Breast                           | 6223           | 22                            | 3.8                               | 0.08                                  | 16.0                          | 1.38 (0.86 to 2.09)       | 38.6            | 54.9                  |
| W   | Hodgkin Lymphoma              | Colon and Rectum                 | 6223           | 11                            | 1.9                               | 0.04                                  | 8.2                           | 1.34 (0.67 to 2.4)        | 38.6            | 69.6                  |
| W   | Hodgkin Lymphoma              | Corpus and Uterus, NOS           | 6223           | 6                             | 1.0                               | 0.02                                  | 3.0                           | 1.98 (0.73 to 4.3)        | 38.6            | 60.5                  |
| W   | Hodgkin Lymphoma              | Lung and Bronchus                | 6223           | 54                            | 9.2                               | 0.19                                  | 23.7                          | 2.28 (1.72 to 2.98)       | 38.6            | 68.0                  |
| W   | Hodgkin Lymphoma              | Non-Hodgkin Lymphoma             | 6223           | 80                            | 13.7                              | 0.29                                  | 3.3                           | 24.25 (19.23 to 30.19)    | 38.6            | 66.7                  |
| W   | Hodgkin Lymphoma              | Ovary                            | 6223           | 5                             | 0.9                               | 0.02                                  | 5.2                           | 0.96 (0.31 to 2.23)       | 38.6            | 56.8                  |
| W   | Kidney and Renal Pelvis       | Acute Non-lymphocytic Leukemia   | 15880          | 16                            | 1.5                               | 0.06                                  | 10.6                          | 1.52 (0.87 to 2.46)       | 60.5            | 76.6                  |
| W   | Kidney and Renal Pelvis       | Brain and Other Nervous System   | 15880          | 18                            | 1.7                               | 0.06                                  | 11.8                          | 1.53 (0.91 to 2.42)       | 60.5            | 70.9                  |
| W   | Kidney and Renal Pelvis       | Breast                           | 15880          | 69                            | 6.6                               | 0.25                                  | 78.9                          | 0.87 (0.68 to 1.11)       | 60.5            | 73.2                  |
| W   | Kidney and Renal Pelvis       | Chronic Myeloid Leukemia         | 15880          | 5                             | 0.5                               | 0.02                                  | 1.1                           | 4.63 (1.5 to 10.8)        | 60.5            | 80.1                  |
| W   | Kidney and Renal Pelvis       | Colon and Rectum                 | 15880          | 49                            | 4.7                               | 0.18                                  | 56.3                          | 0.87 (0.64 to 1.15)       | 60.5            | 75.5                  |
| W   | Kidney and Renal Pelvis       | Corpus and Uterus, NOS           | 15880          | 18                            | 1.7                               | 0.06                                  | 18.7                          | 0.96 (0.57 to 1.52)       | 60.5            | 73.9                  |
| W   | Kidney and Renal Pelvis       | Gallbladder and Other Biliary    | 15880          | 7                             | 0.7                               | 0.03                                  | 5.2                           | 1.36 (0.55 to 2.79)       | 60.5            | 75.6                  |
| W   | Kidney and Renal Pelvis       | Liver and Intrahepatic Bile Duct | 15880          | 18                            | 1.7                               | 0.06                                  | 15.9                          | 1.13 (0.67 to 1.79)       | 60.5            | 74.9                  |
| W   | Kidney and Renal Pelvis       | Lung and Bronchus                | 15880          | 190                           | 18.0                              | 0.69                                  | 157.4                         | 1.21 (1.04 to 1.39)       | 60.5            | 75.3                  |
| W   | Kidney and Renal Pelvis       | Melanoma of the Skin             | 15880          | 5                             | 0.5                               | 0.02                                  | 5.7                           | 0.88 (0.29 to 2.06)       | 60.5            | 69.2                  |
| W   | Kidney and Renal Pelvis       | Myeloma                          | 15880          | 15                            | 1.4                               | 0.05                                  | 12.6                          | 1.19 (0.67 to 1.96)       | 60.5            | 76.0                  |
| W   | Kidney and Renal Pelvis       | Non-Hodgkin Lymphoma             | 15880          | 18                            | 1.7                               | 0.06                                  | 26.2                          | 0.69 (0.41 to 1.09)       | 60.5            | 75.2                  |
| W   | Kidney and Renal Pelvis       | Oral Cavity and Pharynx          | 15880          | 7                             | 0.7                               | 0.03                                  | 5.6                           | 1.24 (0.5 to 2.56)        | 60.5            | 80.8                  |
| W   | Kidney and Renal Pelvis       | Ovary                            | 15880          | 15                            | 1.4                               | 0.05                                  | 30.2                          | 0.5 (0.28 to 0.82)        | 60.5            | 76.6                  |
| W   | Kidney and Renal Pelvis       | Pancreas                         | 15880          | 56                            | 5.3                               | 0.20                                  | 42.7                          | 1.31 (0.99 to 1.7)        | 60.5            | 74.6                  |

| Sex | First Primary Cancer (FPC)       | Subsequent Primary Cancer (SPC)  | Survivors, No. | Observed Number of SPC Deaths | Mortality per 10,000 person-years | % Contribution to the Total Mortality | Expected Number of SPC Deaths | SMR (95% CI)           | Mean Age at FPC | Mean Age at SPC Death |
|-----|----------------------------------|----------------------------------|----------------|-------------------------------|-----------------------------------|---------------------------------------|-------------------------------|------------------------|-----------------|-----------------------|
| W   | Kidney and Renal Pelvis          | Soft Tissue including Heart      | 15880          | 5                             | 0.5                               | 0.02                                  | 3.7                           | 1.37 (0.44 to 3.18)    | 60.5            | 68.5                  |
| W   | Kidney and Renal Pelvis          | Stomach                          | 15880          | 12                            | 1.1                               | 0.04                                  | 10.3                          | 1.16 (0.6 to 2.03)     | 60.5            | 76.6                  |
| W   | Kidney and Renal Pelvis          | Thyroid                          | 15880          | 6                             | 0.6                               | 0.02                                  | 2.2                           | 2.71 (1 to 5.9)        | 60.5            | 76.5                  |
| W   | Kidney and Renal Pelvis          | Urinary Bladder                  | 15880          | 33                            | 3.1                               | 0.12                                  | 10.4                          | 3.18 (2.19 to 4.46)    | 60.5            | 76.8                  |
| W   | Kidney and Renal Pelvis          | Vulva and Other Genital Organs   | 15880          | 6                             | 0.6                               | 0.02                                  | 4.3                           | 1.41 (0.52 to 3.06)    | 60.5            | 83.3                  |
| W   | Larynx                           | Breast                           | 2087           | 8                             | 5.8                               | 0.03                                  | 10.7                          | 0.75 (0.32 to 1.47)    | 61.0            | 74.4                  |
| W   | Larynx                           | Colon and Rectum                 | 2087           | 16                            | 11.7                              | 0.06                                  | 7.6                           | 2.1 (1.2 to 3.41)      | 61.0            | 77.7                  |
| W   | Larynx                           | Esophagus                        | 2087           | 16                            | 11.7                              | 0.06                                  | 0.9                           | 17.44 (9.97 to 28.33)  | 61.0            | 69.9                  |
| W   | Larynx                           | Lung and Bronchus                | 2087           | 186                           | 135.9                             | 0.67                                  | 22.1                          | 8.41 (7.25 to 9.71)    | 61.0            | 73.5                  |
| W   | Larynx                           | Oral Cavity and Pharynx          | 2087           | 29                            | 21.2                              | 0.10                                  | 0.7                           | 38.79 (25.98 to 55.71) | 61.0            | 70.7                  |
| W   | Larynx                           | Ovary                            | 2087           | 7                             | 5.1                               | 0.03                                  | 4.2                           | 1.68 (0.67 to 3.45)    | 61.0            | 72.3                  |
| W   | Larynx                           | Pancreas                         | 2087           | 8                             | 5.8                               | 0.03                                  | 5.7                           | 1.41 (0.61 to 2.78)    | 61.0            | 75.4                  |
| W   | Liver and Intrahepatic Bile Duct | Colon and Rectum                 | 1454           | 6                             | 8.8                               | 0.02                                  | 2.8                           | 2.11 (0.77 to 4.59)    | 60.4            | 68.6                  |
| W   | Liver and Intrahepatic Bile Duct | Gallbladder and Other Biliary    | 1454           | 6                             | 8.8                               | 0.02                                  | 0.3                           | 18.97 (6.96 to 41.29)  | 60.4            | 66.3                  |
| W   | Liver and Intrahepatic Bile Duct | Lung and Bronchus                | 1454           | 15                            | 22.0                              | 0.05                                  | 8.0                           | 1.88 (1.05 to 3.1)     | 60.4            | 73.5                  |
| W   | Liver and Intrahepatic Bile Duct | Non-Hodgkin Lymphoma             | 1454           | 6                             | 8.8                               | 0.02                                  | 1.3                           | 4.8 (1.76 to 10.44)    | 60.4            | 75.0                  |
| W   | Liver and Intrahepatic Bile Duct | Pancreas                         | 1454           | 7                             | 10.3                              | 0.03                                  | 2.3                           | 2.99 (1.2 to 6.15)     | 60.4            | 64.8                  |
| W   | Lung and Bronchus                | Acute Non-lymphocytic Leukemia   | 24018          | 27                            | 2.1                               | 0.10                                  | 15.9                          | 1.69 (1.12 to 2.46)    | 64.8            | 75.7                  |
| W   | Lung and Bronchus                | Brain and Other Nervous System   | 24018          | 22                            | 1.7                               | 0.08                                  | 16.8                          | 1.31 (0.82 to 1.98)    | 64.8            | 72.5                  |
| W   | Lung and Bronchus                | Breast                           | 24018          | 120                           | 9.1                               | 0.43                                  | 113.1                         | 1.06 (0.88 to 1.27)    | 64.8            | 73.8                  |
| W   | Lung and Bronchus                | Cervix Uteri                     | 24018          | 10                            | 0.8                               | 0.04                                  | 7.4                           | 1.34 (0.64 to 2.47)    | 64.8            | 67.5                  |
| W   | Lung and Bronchus                | Colon and Rectum                 | 24018          | 101                           | 7.7                               | 0.36                                  | 84.9                          | 1.19 (0.97 to 1.45)    | 64.8            | 77.3                  |
| W   | Lung and Bronchus                | Corpus and Uterus, NOS           | 24018          | 18                            | 1.4                               | 0.06                                  | 26.4                          | 0.68 (0.4 to 1.08)     | 64.8            | 79.7                  |
| W   | Lung and Bronchus                | Esophagus                        | 24018          | 44                            | 3.3                               | 0.16                                  | 9.9                           | 4.44 (3.23 to 5.97)    | 64.8            | 75.3                  |
| W   | Lung and Bronchus                | Kidney and Renal Pelvis          | 24018          | 22                            | 1.7                               | 0.08                                  | 16.0                          | 1.38 (0.86 to 2.08)    | 64.8            | 76.8                  |
| W   | Lung and Bronchus                | Larynx                           | 24018          | 7                             | 0.5                               | 0.03                                  | 2.4                           | 2.97 (1.19 to 6.11)    | 64.8            | 72.5                  |
| W   | Lung and Bronchus                | Liver and Intrahepatic Bile Duct | 24018          | 42                            | 3.2                               | 0.15                                  | 23.3                          | 1.81 (1.3 to 2.44)     | 64.8            | 73.7                  |
| W   | Lung and Bronchus                | Melanoma of the Skin             | 24018          | 10                            | 0.8                               | 0.04                                  | 8.4                           | 1.2 (0.57 to 2.2)      | 64.8            | 77.3                  |
| W   | Lung and Bronchus                | Myeloma                          | 24018          | 24                            | 1.8                               | 0.09                                  | 18.9                          | 1.27 (0.82 to 1.89)    | 64.8            | 76.5                  |
| W   | Lung and Bronchus                | Non-Hodgkin Lymphoma             | 24018          | 56                            | 4.3                               | 0.20                                  | 40.9                          | 1.37 (1.03 to 1.78)    | 64.8            | 78.6                  |
| W   | Lung and Bronchus                | Oral Cavity and Pharynx          | 24018          | 15                            | 1.1                               | 0.05                                  | 8.3                           | 1.8 (1.01 to 2.97)     | 64.8            | 73.8                  |
| W   | Lung and Bronchus                | Ovary                            | 24018          | 57                            | 4.3                               | 0.21                                  | 44.6                          | 1.28 (0.97 to 1.66)    | 64.8            | 75.3                  |

| Sex | First Primary Cancer (FPC) | Subsequent Primary Cancer (SPC)  | Survivors, No. | Observed Number of SPC Deaths | Mortality per 10,000 person-years | % Contribution to the Total Mortality | Expected Number of SPC Deaths | SMR (95% CI)         | Mean Age at FPC | Mean Age at SPC Death |
|-----|----------------------------|----------------------------------|----------------|-------------------------------|-----------------------------------|---------------------------------------|-------------------------------|----------------------|-----------------|-----------------------|
| W   | Lung and Bronchus          | Pancreas                         | 24018          | 94                            | 7.1                               | 0.34                                  | 63.5                          | 1.48 (1.2 to 1.81)   | 64.8            | 77.0                  |
| W   | Lung and Bronchus          | Soft Tissue including Heart      | 24018          | 13                            | 1.0                               | 0.05                                  | 5.2                           | 2.5 (1.33 to 4.28)   | 64.8            | 70.1                  |
| W   | Lung and Bronchus          | Stomach                          | 24018          | 15                            | 1.1                               | 0.05                                  | 15.4                          | 0.97 (0.54 to 1.6)   | 64.8            | 79.9                  |
| W   | Lung and Bronchus          | Thyroid                          | 24018          | 6                             | 0.5                               | 0.02                                  | 3.3                           | 1.81 (0.67 to 3.95)  | 64.8            | 68.4                  |
| W   | Lung and Bronchus          | Urinary Bladder                  | 24018          | 28                            | 2.1                               | 0.10                                  | 15.8                          | 1.77 (1.17 to 2.55)  | 64.8            | 81.0                  |
| W   | Melanoma of the Skin       | Acute Non-lymphocytic Leukemia   | 39213          | 29                            | 0.9                               | 0.10                                  | 22.4                          | 1.29 (0.87 to 1.86)  | 51.4            | 74.9                  |
| W   | Melanoma of the Skin       | Brain and Other Nervous System   | 39213          | 58                            | 1.7                               | 0.21                                  | 29.5                          | 1.96 (1.49 to 2.54)  | 51.4            | 69.1                  |
| W   | Melanoma of the Skin       | Breast                           | 39213          | 134                           | 4.0                               | 0.48                                  | 176.9                         | 0.76 (0.64 to 0.9)   | 51.4            | 68.5                  |
| W   | Melanoma of the Skin       | Colon and Rectum                 | 39213          | 94                            | 2.8                               | 0.34                                  | 110.7                         | 0.85 (0.69 to 1.04)  | 51.4            | 74.2                  |
| W   | Melanoma of the Skin       | Corpus and Uterus, NOS           | 39213          | 33                            | 1.0                               | 0.12                                  | 37.3                          | 0.88 (0.61 to 1.24)  | 51.4            | 73.6                  |
| W   | Melanoma of the Skin       | Esophagus                        | 39213          | 5                             | 0.1                               | 0.02                                  | 13.5                          | 0.37 (0.12 to 0.87)  | 51.4            | 71.4                  |
| W   | Melanoma of the Skin       | Gallbladder and Other Biliary    | 39213          | 11                            | 0.3                               | 0.04                                  | 10.0                          | 1.1 (0.55 to 1.98)   | 51.4            | 78.8                  |
| W   | Melanoma of the Skin       | Kidney and Renal Pelvis          | 39213          | 21                            | 0.6                               | 0.08                                  | 22.3                          | 0.94 (0.58 to 1.44)  | 51.4            | 73.5                  |
| W   | Melanoma of the Skin       | Liver and Intrahepatic Bile Duct | 39213          | 32                            | 1.0                               | 0.12                                  | 30.6                          | 1.05 (0.72 to 1.48)  | 51.4            | 71.4                  |
| W   | Melanoma of the Skin       | Lung and Bronchus                | 39213          | 309                           | 9.2                               | 1.11                                  | 336.1                         | 0.92 (0.82 to 1.03)  | 51.4            | 73.2                  |
| W   | Melanoma of the Skin       | Myeloma                          | 39213          | 36                            | 1.1                               | 0.13                                  | 22.6                          | 1.59 (1.12 to 2.21)  | 51.4            | 72.3                  |
| W   | Melanoma of the Skin       | Non-Hodgkin Lymphoma             | 39213          | 66                            | 2.0                               | 0.24                                  | 52.5                          | 1.26 (0.97 to 1.6)   | 51.4            | 76.1                  |
| W   | Melanoma of the Skin       | Oral Cavity and Pharynx          | 39213          | 10                            | 0.3                               | 0.04                                  | 12.0                          | 0.84 (0.4 to 1.54)   | 51.4            | 77.9                  |
| W   | Melanoma of the Skin       | Ovary                            | 39213          | 61                            | 1.8                               | 0.22                                  | 67.8                          | 0.9 (0.69 to 1.16)   | 51.4            | 69.4                  |
| W   | Melanoma of the Skin       | Pancreas                         | 39213          | 82                            | 2.5                               | 0.30                                  | 84.3                          | 0.97 (0.77 to 1.21)  | 51.4            | 73.4                  |
| W   | Melanoma of the Skin       | Soft Tissue including Heart      | 39213          | 21                            | 0.6                               | 0.08                                  | 8.4                           | 2.51 (1.55 to 3.83)  | 51.4            | 67.9                  |
| W   | Melanoma of the Skin       | Stomach                          | 39213          | 20                            | 0.6                               | 0.07                                  | 18.0                          | 1.11 (0.68 to 1.71)  | 51.4            | 79.3                  |
| W   | Melanoma of the Skin       | Urinary Bladder                  | 39213          | 13                            | 0.4                               | 0.05                                  | 19.9                          | 0.65 (0.35 to 1.12)  | 51.4            | 74.4                  |
| W   | Melanoma of the Skin       | Vulva and Other Genital Organs   | 39213          | 10                            | 0.3                               | 0.04                                  | 9.2                           | 1.09 (0.52 to 2)     | 51.4            | 72.1                  |
| W   | Myeloma                    | Acute Non-lymphocytic Leukemia   | 5549           | 22                            | 9.1                               | 0.08                                  | 2.4                           | 9.33 (5.85 to 14.13) | 63.0            | 70.9                  |
| W   | Myeloma                    | Breast                           | 5549           | 11                            | 4.6                               | 0.04                                  | 18.7                          | 0.59 (0.29 to 1.05)  | 63.0            | 71.2                  |
| W   | Myeloma                    | Colon and Rectum                 | 5549           | 13                            | 5.4                               | 0.05                                  | 13.4                          | 0.97 (0.52 to 1.66)  | 63.0            | 75.7                  |
| W   | Myeloma                    | Corpus and Uterus, NOS           | 5549           | 6                             | 2.5                               | 0.02                                  | 4.8                           | 1.26 (0.46 to 2.74)  | 63.0            | 80.5                  |
| W   | Myeloma                    | Liver and Intrahepatic Bile Duct | 5549           | 7                             | 2.9                               | 0.03                                  | 3.8                           | 1.84 (0.74 to 3.79)  | 63.0            | 78.9                  |
| W   | Myeloma                    | Lung and Bronchus                | 5549           | 25                            | 10.4                              | 0.09                                  | 36.0                          | 0.7 (0.45 to 1.03)   | 63.0            | 75.3                  |
| W   | Myeloma                    | Non-Hodgkin Lymphoma             | 5549           | 9                             | 3.7                               | 0.03                                  | 5.8                           | 1.56 (0.72 to 2.97)  | 63.0            | 78.6                  |
| W   | Myeloma                    | Ovary                            | 5549           | 7                             | 2.9                               | 0.03                                  | 6.9                           | 1.02 (0.41 to 2.1)   | 63.0            | 73.0                  |

| Sex | First Primary Cancer (FPC) | Subsequent Primary Cancer (SPC)  | Survivors, No. | Observed Number of SPC Deaths | Mortality per 10,000 person-years | % Contribution to the Total Mortality | Expected Number of SPC Deaths | SMR (95% CI)          | Mean Age at FPC | Mean Age at SPC Death |
|-----|----------------------------|----------------------------------|----------------|-------------------------------|-----------------------------------|---------------------------------------|-------------------------------|-----------------------|-----------------|-----------------------|
| W   | Myeloma                    | Stomach                          | 5549           | 5                             | 2.1                               | 0.02                                  | 2.6                           | 1.9 (0.62 to 4.44)    | 63.0            | 80.6                  |
| W   | Non-Hodgkin Lymphoma       | Acute Lymphocytic Leukemia       | 36978          | 22                            | 0.9                               | 0.08                                  | 2.0                           | 10.84 (6.79 to 16.41) | 61.6            | 69.2                  |
| W   | Non-Hodgkin Lymphoma       | Acute Non-lymphocytic Leukemia   | 36978          | 130                           | 5.2                               | 0.47                                  | 26.1                          | 4.97 (4.16 to 5.91)   | 61.6            | 72.9                  |
| W   | Non-Hodgkin Lymphoma       | Bones and Joints                 | 36978          | 12                            | 0.5                               | 0.04                                  | 2.4                           | 5.07 (2.62 to 8.86)   | 61.6            | 73.6                  |
| W   | Non-Hodgkin Lymphoma       | Brain and Other Nervous System   | 36978          | 53                            | 2.1                               | 0.19                                  | 28.4                          | 1.87 (1.4 to 2.44)    | 61.6            | 73.2                  |
| W   | Non-Hodgkin Lymphoma       | Breast                           | 36978          | 141                           | 5.7                               | 0.51                                  | 189.3                         | 0.75 (0.63 to 0.88)   | 61.6            | 74.3                  |
| W   | Non-Hodgkin Lymphoma       | Cervix Uteri                     | 36978          | 8                             | 0.3                               | 0.03                                  | 12.9                          | 0.62 (0.27 to 1.22)   | 61.6            | 63.8                  |
| W   | Non-Hodgkin Lymphoma       | Chronic Myeloid Leukemia         | 36978          | 14                            | 0.6                               | 0.05                                  | 2.7                           | 5.1 (2.79 to 8.55)    | 61.6            | 80.3                  |
| W   | Non-Hodgkin Lymphoma       | Colon and Rectum                 | 36978          | 165                           | 6.7                               | 0.60                                  | 139.0                         | 1.19 (1.01 to 1.38)   | 61.6            | 78.6                  |
| W   | Non-Hodgkin Lymphoma       | Corpus and Uterus, NOS           | 36978          | 53                            | 2.1                               | 0.19                                  | 43.0                          | 1.23 (0.92 to 1.61)   | 61.6            | 74.9                  |
| W   | Non-Hodgkin Lymphoma       | Esophagus                        | 36978          | 29                            | 1.2                               | 0.10                                  | 16.0                          | 1.81 (1.21 to 2.6)    | 61.6            | 73.4                  |
| W   | Non-Hodgkin Lymphoma       | Gallbladder and Other Biliary    | 36978          | 9                             | 0.4                               | 0.03                                  | 12.6                          | 0.72 (0.33 to 1.36)   | 61.6            | 80.6                  |
| W   | Non-Hodgkin Lymphoma       | Hodgkin Lymphoma                 | 36978          | 56                            | 2.3                               | 0.20                                  | 2.2                           | 24.9 (18.81 to 32.34) | 61.6            | 73.6                  |
| W   | Non-Hodgkin Lymphoma       | Kidney and Renal Pelvis          | 36978          | 28                            | 1.1                               | 0.10                                  | 26.2                          | 1.07 (0.71 to 1.55)   | 61.6            | 79.3                  |
| W   | Non-Hodgkin Lymphoma       | Larynx                           | 36978          | 5                             | 0.2                               | 0.02                                  | 3.8                           | 1.33 (0.43 to 3.09)   | 61.6            | 69.5                  |
| W   | Non-Hodgkin Lymphoma       | Liver and Intrahepatic Bile Duct | 36978          | 60                            | 2.4                               | 0.22                                  | 37.9                          | 1.59 (1.21 to 2.04)   | 61.6            | 75.0                  |
| W   | Non-Hodgkin Lymphoma       | Lung and Bronchus                | 36978          | 517                           | 20.9                              | 1.87                                  | 380.4                         | 1.36 (1.24 to 1.48)   | 61.6            | 75.7                  |
| W   | Non-Hodgkin Lymphoma       | Melanoma of the Skin             | 36978          | 35                            | 1.4                               | 0.13                                  | 14.4                          | 2.44 (1.7 to 3.39)    | 61.6            | 75.1                  |
| W   | Non-Hodgkin Lymphoma       | Myeloma                          | 36978          | 41                            | 1.7                               | 0.15                                  | 29.7                          | 1.38 (0.99 to 1.87)   | 61.6            | 77.5                  |
| W   | Non-Hodgkin Lymphoma       | Oral Cavity and Pharynx          | 36978          | 18                            | 0.7                               | 0.06                                  | 13.9                          | 1.3 (0.77 to 2.05)    | 61.6            | 76.6                  |
| W   | Non-Hodgkin Lymphoma       | Ovary                            | 36978          | 93                            | 3.8                               | 0.34                                  | 73.3                          | 1.27 (1.02 to 1.55)   | 61.6            | 75.0                  |
| W   | Non-Hodgkin Lymphoma       | Pancreas                         | 36978          | 130                           | 5.2                               | 0.47                                  | 103.0                         | 1.26 (1.05 to 1.5)    | 61.6            | 78.5                  |
| W   | Non-Hodgkin Lymphoma       | Small Intestine                  | 36978          | 9                             | 0.4                               | 0.03                                  | 3.1                           | 2.94 (1.35 to 5.59)   | 61.6            | 73.5                  |
| W   | Non-Hodgkin Lymphoma       | Soft Tissue including Heart      | 36978          | 11                            | 0.4                               | 0.04                                  | 8.7                           | 1.26 (0.63 to 2.25)   | 61.6            | 75.8                  |
| W   | Non-Hodgkin Lymphoma       | Stomach                          | 36978          | 44                            | 1.8                               | 0.16                                  | 24.6                          | 1.79 (1.3 to 2.4)     | 61.6            | 76.6                  |
| W   | Non-Hodgkin Lymphoma       | Thyroid                          | 36978          | 9                             | 0.4                               | 0.03                                  | 5.4                           | 1.67 (0.77 to 3.18)   | 61.6            | 79.3                  |
| W   | Non-Hodgkin Lymphoma       | Urinary Bladder                  | 36978          | 25                            | 1.0                               | 0.09                                  | 26.2                          | 0.96 (0.62 to 1.41)   | 61.6            | 77.7                  |
| W   | Non-Hodgkin Lymphoma       | Vulva and Other Genital Organs   | 36978          | 10                            | 0.4                               | 0.04                                  | 10.6                          | 0.95 (0.45 to 1.74)   | 61.6            | 78.5                  |
| W   | Oral Cavity and Pharynx    | Acute Non-lymphocytic Leukemia   | 10680          | 8                             | 1.1                               | 0.03                                  | 6.6                           | 1.21 (0.52 to 2.38)   | 58.1            | 73.5                  |
| W   | Oral Cavity and Pharynx    | Bones and Joints                 | 10680          | 14                            | 1.8                               | 0.05                                  | 0.6                           | 23.18 (12.67 to 38.9) | 58.1            | 71.9                  |
| W   | Oral Cavity and Pharynx    | Brain and Other Nervous System   | 10680          | 9                             | 1.2                               | 0.03                                  | 7.5                           | 1.19 (0.55 to 2.27)   | 58.1            | 71.0                  |
| W   | Oral Cavity and Pharynx    | Breast                           | 10680          | 55                            | 7.2                               | 0.20                                  | 50.4                          | 1.09 (0.82 to 1.42)   | 58.1            | 74.3                  |

| Sex | First Primary Cancer (FPC) | Subsequent Primary Cancer (SPC)  | Survivors, No. | Observed Number of SPC Deaths | Mortality per 10,000 person-years | % Contribution to the Total Mortality | Expected Number of SPC Deaths | SMR (95% CI)           | Mean Age at FPC | Mean Age at SPC Death |
|-----|----------------------------|----------------------------------|----------------|-------------------------------|-----------------------------------|---------------------------------------|-------------------------------|------------------------|-----------------|-----------------------|
| W   | Oral Cavity and Pharynx    | Colon and Rectum                 | 10680          | 52                            | 6.8                               | 0.19                                  | 35.6                          | 1.46 (1.09 to 1.92)    | 58.1            | 75.3                  |
| W   | Oral Cavity and Pharynx    | Corpus and Uterus, NOS           | 10680          | 11                            | 1.4                               | 0.04                                  | 11.4                          | 0.97 (0.48 to 1.73)    | 58.1            | 68.3                  |
| W   | Oral Cavity and Pharynx    | Esophagus                        | 10680          | 62                            | 8.2                               | 0.22                                  | 4.1                           | 15.01 (11.51 to 19.24) | 58.1            | 68.3                  |
| W   | Oral Cavity and Pharynx    | Kidney and Renal Pelvis          | 10680          | 8                             | 1.1                               | 0.03                                  | 6.6                           | 1.2 (0.52 to 2.37)     | 58.1            | 71.1                  |
| W   | Oral Cavity and Pharynx    | Larynx                           | 10680          | 59                            | 7.8                               | 0.21                                  | 1.0                           | 58.35 (44.42 to 75.27) | 58.1            | 72.1                  |
| W   | Oral Cavity and Pharynx    | Liver and Intrahepatic Bile Duct | 10680          | 17                            | 2.2                               | 0.06                                  | 10.1                          | 1.68 (0.98 to 2.69)    | 58.1            | 73.4                  |
| W   | Oral Cavity and Pharynx    | Lung and Bronchus                | 10680          | 295                           | 38.8                              | 1.06                                  | 98.7                          | 2.99 (2.66 to 3.35)    | 58.1            | 73.3                  |
| W   | Oral Cavity and Pharynx    | Melanoma of the Skin             | 10680          | 7                             | 0.9                               | 0.03                                  | 3.6                           | 1.93 (0.78 to 3.98)    | 58.1            | 68.3                  |
| W   | Oral Cavity and Pharynx    | Myeloma                          | 10680          | 11                            | 1.4                               | 0.04                                  | 7.6                           | 1.46 (0.73 to 2.61)    | 58.1            | 85.4                  |
| W   | Oral Cavity and Pharynx    | Non-Hodgkin Lymphoma             | 10680          | 22                            | 2.9                               | 0.08                                  | 16.5                          | 1.33 (0.84 to 2.02)    | 58.1            | 78.1                  |
| W   | Oral Cavity and Pharynx    | Ovary                            | 10680          | 18                            | 2.4                               | 0.06                                  | 19.4                          | 0.93 (0.55 to 1.47)    | 58.1            | 74.6                  |
| W   | Oral Cavity and Pharynx    | Pancreas                         | 10680          | 34                            | 4.5                               | 0.12                                  | 26.3                          | 1.3 (0.9 to 1.81)      | 58.1            | 75.9                  |
| W   | Oral Cavity and Pharynx    | Soft Tissue including Heart      | 10680          | 6                             | 0.8                               | 0.02                                  | 2.3                           | 2.56 (0.94 to 5.56)    | 58.1            | 62.6                  |
| W   | Oral Cavity and Pharynx    | Stomach                          | 10680          | 9                             | 1.2                               | 0.03                                  | 6.7                           | 1.34 (0.61 to 2.54)    | 58.1            | 75.4                  |
| W   | Oral Cavity and Pharynx    | Urinary Bladder                  | 10680          | 9                             | 1.2                               | 0.03                                  | 6.3                           | 1.43 (0.66 to 2.72)    | 58.1            | 74.7                  |
| W   | Ovary                      | Acute Non-lymphocytic Leukemia   | 18095          | 26                            | 2.0                               | 0.09                                  | 9.8                           | 2.67 (1.74 to 3.91)    | 55.1            | 65.7                  |
| W   | Ovary                      | Brain and Other Nervous System   | 18095          | 15                            | 1.1                               | 0.05                                  | 12.1                          | 1.24 (0.7 to 2.05)     | 55.1            | 70.0                  |
| W   | Ovary                      | Breast                           | 18095          | 84                            | 6.4                               | 0.30                                  | 76.9                          | 1.09 (0.87 to 1.35)    | 55.1            | 68.3                  |
| W   | Ovary                      | Colon and Rectum                 | 18095          | 68                            | 5.2                               | 0.25                                  | 50.1                          | 1.36 (1.06 to 1.72)    | 55.1            | 73.0                  |
| W   | Ovary                      | Esophagus                        | 18095          | 6                             | 0.5                               | 0.02                                  | 6.0                           | 1 (0.37 to 2.17)       | 55.1            | 64.9                  |
| W   | Ovary                      | Gallbladder and Other Biliary    | 18095          | 6                             | 0.5                               | 0.02                                  | 4.7                           | 1.27 (0.47 to 2.77)    | 55.1            | 78.3                  |
| W   | Ovary                      | Kidney and Renal Pelvis          | 18095          | 7                             | 0.5                               | 0.03                                  | 9.8                           | 0.72 (0.29 to 1.48)    | 55.1            | 69.9                  |
| W   | Ovary                      | Liver and Intrahepatic Bile Duct | 18095          | 11                            | 0.8                               | 0.04                                  | 15.0                          | 0.74 (0.37 to 1.32)    | 55.1            | 70.0                  |
| W   | Ovary                      | Lung and Bronchus                | 18095          | 155                           | 11.9                              | 0.56                                  | 149.0                         | 1.04 (0.88 to 1.22)    | 55.1            | 71.8                  |
| W   | Ovary                      | Myeloma                          | 18095          | 9                             | 0.7                               | 0.03                                  | 10.7                          | 0.84 (0.39 to 1.6)     | 55.1            | 77.5                  |
| W   | Ovary                      | Non-Hodgkin Lymphoma             | 18095          | 23                            | 1.8                               | 0.08                                  | 23.0                          | 1 (0.63 to 1.5)        | 55.1            | 74.1                  |
| W   | Ovary                      | Oral Cavity and Pharynx          | 18095          | 6                             | 0.5                               | 0.02                                  | 5.3                           | 1.13 (0.42 to 2.46)    | 55.1            | 71.2                  |
| W   | Ovary                      | Pancreas                         | 18095          | 60                            | 4.6                               | 0.22                                  | 38.2                          | 1.57 (1.2 to 2.02)     | 55.1            | 73.7                  |
| W   | Ovary                      | Soft Tissue including Heart      | 18095          | 9                             | 0.7                               | 0.03                                  | 3.6                           | 2.48 (1.14 to 4.71)    | 55.1            | 65.3                  |
| W   | Ovary                      | Stomach                          | 18095          | 14                            | 1.1                               | 0.05                                  | 9.5                           | 1.48 (0.81 to 2.49)    | 55.1            | 75.3                  |
| W   | Ovary                      | Urinary Bladder                  | 18095          | 5                             | 0.4                               | 0.02                                  | 8.6                           | 0.58 (0.19 to 1.36)    | 55.1            | 72.6                  |
| W   | Pancreas                   | Breast                           | 1665           | 6                             | 6.9                               | 0.02                                  | 6.1                           | 0.98 (0.36 to 2.13)    | 59.8            | 78.5                  |

| Sex | First Primary Cancer (FPC)  | Subsequent Primary Cancer (SPC)  | Survivors, No. | Observed Number of SPC Deaths | Mortality per 10,000 person-years | % Contribution to the Total Mortality | Expected Number of SPC Deaths | SMR (95% CI)           | Mean Age at FPC | Mean Age at SPC Death |
|-----|-----------------------------|----------------------------------|----------------|-------------------------------|-----------------------------------|---------------------------------------|-------------------------------|------------------------|-----------------|-----------------------|
| W   | Pancreas                    | Colon and Rectum                 | 1665           | 9                             | 10.3                              | 0.03                                  | 4.5                           | 2.01 (0.92 to 3.82)    | 59.8            | 72.4                  |
| W   | Pancreas                    | Lung and Bronchus                | 1665           | 23                            | 26.4                              | 0.08                                  | 11.8                          | 1.95 (1.24 to 2.92)    | 59.8            | 74.3                  |
| W   | Pancreas                    | Ovary                            | 1665           | 5                             | 5.7                               | 0.02                                  | 2.3                           | 2.19 (0.71 to 5.1)     | 59.8            | 68.0                  |
| W   | Pancreas                    | Stomach                          | 1665           | 8                             | 9.2                               | 0.03                                  | 0.9                           | 9.04 (3.9 to 17.81)    | 59.8            | 64.1                  |
| W   | Small Intestine             | Breast                           | 2493           | 10                            | 6.6                               | 0.04                                  | 11.5                          | 0.87 (0.42 to 1.6)     | 60.4            | 71.0                  |
| W   | Small Intestine             | Colon and Rectum                 | 2493           | 61                            | 40.3                              | 0.22                                  | 8.1                           | 7.53 (5.76 to 9.67)    | 60.4            | 71.7                  |
| W   | Small Intestine             | Liver and Intrahepatic Bile Duct | 2493           | 18                            | 11.9                              | 0.06                                  | 2.2                           | 8.08 (4.79 to 12.77)   | 60.4            | 75.0                  |
| W   | Small Intestine             | Lung and Bronchus                | 2493           | 26                            | 17.2                              | 0.09                                  | 22.3                          | 1.16 (0.76 to 1.71)    | 60.4            | 78.1                  |
| W   | Small Intestine             | Non-Hodgkin Lymphoma             | 2493           | 5                             | 3.3                               | 0.02                                  | 3.7                           | 1.34 (0.44 to 3.13)    | 60.4            | 76.6                  |
| W   | Small Intestine             | Ovary                            | 2493           | 7                             | 4.6                               | 0.03                                  | 4.3                           | 1.64 (0.66 to 3.37)    | 60.4            | 72.8                  |
| W   | Small Intestine             | Pancreas                         | 2493           | 13                            | 8.6                               | 0.05                                  | 6.1                           | 2.12 (1.13 to 3.63)    | 60.4            | 69.0                  |
| W   | Small Intestine             | Soft Tissue including Heart      | 2493           | 31                            | 20.5                              | 0.11                                  | 0.5                           | 58.45 (39.71 to 82.97) | 60.4            | 70.9                  |
| W   | Small Intestine             | Stomach                          | 2493           | 15                            | 9.9                               | 0.05                                  | 1.5                           | 10.34 (5.79 to 17.05)  | 60.4            | 63.2                  |
| W   | Soft Tissue including Heart | Acute Non-lymphocytic Leukemia   | 4197           | 6                             | 1.8                               | 0.02                                  | 2.3                           | 2.55 (0.94 to 5.56)    | 52.9            | 64.0                  |
| W   | Soft Tissue including Heart | Bones and Joints                 | 4197           | 22                            | 6.6                               | 0.08                                  | 0.2                           | 98.15 (61.51 to 148.6) | 52.9            | 59.5                  |
| W   | Soft Tissue including Heart | Breast                           | 4197           | 16                            | 4.8                               | 0.06                                  | 18.8                          | 0.85 (0.49 to 1.38)    | 52.9            | 68.7                  |
| W   | Soft Tissue including Heart | Colon and Rectum                 | 4197           | 17                            | 5.1                               | 0.06                                  | 12.6                          | 1.35 (0.79 to 2.16)    | 52.9            | 78.5                  |
| W   | Soft Tissue including Heart | Corpus and Uterus, NOS           | 4197           | 7                             | 2.1                               | 0.03                                  | 4.3                           | 1.64 (0.66 to 3.38)    | 52.9            | 60.9                  |
| W   | Soft Tissue including Heart | Lung and Bronchus                | 4197           | 55                            | 16.4                              | 0.20                                  | 34.8                          | 1.58 (1.19 to 2.06)    | 52.9            | 72.3                  |
| W   | Soft Tissue including Heart | Melanoma of the Skin             | 4197           | 7                             | 2.1                               | 0.03                                  | 1.3                           | 5.28 (2.12 to 10.88)   | 52.9            | 68.2                  |
| W   | Soft Tissue including Heart | Non-Hodgkin Lymphoma             | 4197           | 9                             | 2.7                               | 0.03                                  | 5.7                           | 1.59 (0.73 to 3.02)    | 52.9            | 76.5                  |
| W   | Soft Tissue including Heart | Ovary                            | 4197           | 11                            | 3.3                               | 0.04                                  | 6.9                           | 1.59 (0.79 to 2.84)    | 52.9            | 73.1                  |
| W   | Soft Tissue including Heart | Pancreas                         | 4197           | 11                            | 3.3                               | 0.04                                  | 9.4                           | 1.17 (0.59 to 2.1)     | 52.9            | 71.1                  |
| W   | Soft Tissue including Heart | Stomach                          | 4197           | 6                             | 1.8                               | 0.02                                  | 2.4                           | 2.51 (0.92 to 5.45)    | 52.9            | 74.5                  |
| W   | Stomach                     | Breast                           | 4496           | 10                            | 3.6                               | 0.04                                  | 21.3                          | 0.47 (0.23 to 0.87)    | 63.8            | 71.6                  |
| W   | Stomach                     | Colon and Rectum                 | 4496           | 30                            | 10.9                              | 0.11                                  | 17.8                          | 1.69 (1.14 to 2.41)    | 63.8            | 77.8                  |
| W   | Stomach                     | Corpus and Uterus, NOS           | 4496           | 6                             | 2.2                               | 0.02                                  | 5.1                           | 1.18 (0.43 to 2.57)    | 63.8            | 71.9                  |
| W   | Stomach                     | Esophagus                        | 4496           | 42                            | 15.2                              | 0.15                                  | 1.9                           | 22.34 (16.1 to 30.2)   | 63.8            | 75.2                  |
| W   | Stomach                     | Liver and Intrahepatic Bile Duct | 4496           | 13                            | 4.7                               | 0.05                                  | 5.8                           | 2.26 (1.2 to 3.86)     | 63.8            | 68.4                  |
| W   | Stomach                     | Lung and Bronchus                | 4496           | 40                            | 14.5                              | 0.14                                  | 41.7                          | 0.96 (0.69 to 1.31)    | 63.8            | 77.1                  |
| W   | Stomach                     | Non-Hodgkin Lymphoma             | 4496           | 8                             | 2.9                               | 0.03                                  | 7.8                           | 1.02 (0.44 to 2.01)    | 63.8            | 80.3                  |
| W   | Stomach                     | Ovary                            | 4496           | 9                             | 3.3                               | 0.03                                  | 8.0                           | 1.13 (0.52 to 2.14)    | 63.8            | 72.6                  |

| Sex | First Primary Cancer (FPC) | Subsequent Primary Cancer (SPC)  | Survivors, No. | Observed Number of SPC Deaths | Mortality per 10,000 person-years | % Contribution to the Total Mortality | Expected Number of SPC Deaths | SMR (95% CI)           | Mean Age at FPC | Mean Age at SPC Death |
|-----|----------------------------|----------------------------------|----------------|-------------------------------|-----------------------------------|---------------------------------------|-------------------------------|------------------------|-----------------|-----------------------|
| W   | Stomach                    | Pancreas                         | 4496           | 20                            | 7.2                               | 0.07                                  | 12.8                          | 1.56 (0.95 to 2.41)    | 63.8            | 77.4                  |
| W   | Stomach                    | Soft Tissue including Heart      | 4496           | 23                            | 8.3                               | 0.08                                  | 1.0                           | 22.86 (14.49 to 34.29) | 63.8            | 66.5                  |
| W   | Thyroid                    | Acute Non-lymphocytic Leukemia   | 43042          | 32                            | 0.9                               | 0.12                                  | 15.3                          | 2.09 (1.43 to 2.96)    | 46.4            | 68.7                  |
| W   | Thyroid                    | Brain and Other Nervous System   | 43042          | 33                            | 0.9                               | 0.12                                  | 22.1                          | 1.49 (1.03 to 2.1)     | 46.4            | 66.3                  |
| W   | Thyroid                    | Breast                           | 43042          | 105                           | 3.0                               | 0.38                                  | 135.1                         | 0.78 (0.64 to 0.94)    | 46.4            | 64.2                  |
| W   | Thyroid                    | Cervix Uteri                     | 43042          | 8                             | 0.2                               | 0.03                                  | 14.4                          | 0.55 (0.24 to 1.09)    | 46.4            | 56.5                  |
| W   | Thyroid                    | Colon and Rectum                 | 43042          | 60                            | 1.7                               | 0.22                                  | 75.7                          | 0.79 (0.61 to 1.02)    | 46.4            | 67.3                  |
| W   | Thyroid                    | Corpus and Uterus, NOS           | 43042          | 30                            | 0.9                               | 0.11                                  | 29.5                          | 1.02 (0.69 to 1.45)    | 46.4            | 66.4                  |
| W   | Thyroid                    | Esophagus                        | 43042          | 9                             | 0.3                               | 0.03                                  | 9.3                           | 0.97 (0.44 to 1.84)    | 46.4            | 70.2                  |
| W   | Thyroid                    | Gallbladder and Other Biliary    | 43042          | 10                            | 0.3                               | 0.04                                  | 7.3                           | 1.37 (0.66 to 2.52)    | 46.4            | 67.8                  |
| W   | Thyroid                    | Kidney and Renal Pelvis          | 43042          | 18                            | 0.5                               | 0.06                                  | 14.9                          | 1.21 (0.72 to 1.91)    | 46.4            | 69.4                  |
| W   | Thyroid                    | Liver and Intrahepatic Bile Duct | 43042          | 40                            | 1.1                               | 0.14                                  | 25.5                          | 1.57 (1.12 to 2.13)    | 46.4            | 66.2                  |
| W   | Thyroid                    | Lung and Bronchus                | 43042          | 180                           | 5.2                               | 0.65                                  | 230.2                         | 0.78 (0.67 to 0.91)    | 46.4            | 72.0                  |
| W   | Thyroid                    | Melanoma of the Skin             | 43042          | 11                            | 0.3                               | 0.04                                  | 9.7                           | 1.13 (0.56 to 2.02)    | 46.4            | 71.3                  |
| W   | Thyroid                    | Myeloma                          | 43042          | 20                            | 0.6                               | 0.07                                  | 15.6                          | 1.28 (0.78 to 1.98)    | 46.4            | 77.0                  |
| W   | Thyroid                    | Non-Hodgkin Lymphoma             | 43042          | 32                            | 0.9                               | 0.12                                  | 31.4                          | 1.02 (0.7 to 1.44)     | 46.4            | 70.4                  |
| W   | Thyroid                    | Oral Cavity and Pharynx          | 43042          | 9                             | 0.3                               | 0.03                                  | 8.7                           | 1.04 (0.47 to 1.97)    | 46.4            | 67.6                  |
| W   | Thyroid                    | Ovary                            | 43042          | 60                            | 1.7                               | 0.22                                  | 48.9                          | 1.23 (0.94 to 1.58)    | 46.4            | 69.2                  |
| W   | Thyroid                    | Pancreas                         | 43042          | 69                            | 2.0                               | 0.25                                  | 59.3                          | 1.16 (0.91 to 1.47)    | 46.4            | 72.0                  |
| W   | Thyroid                    | Soft Tissue including Heart      | 43042          | 22                            | 0.6                               | 0.08                                  | 6.7                           | 3.27 (2.05 to 4.95)    | 46.4            | 64.1                  |
| W   | Thyroid                    | Stomach                          | 43042          | 22                            | 0.6                               | 0.08                                  | 15.6                          | 1.41 (0.89 to 2.14)    | 46.4            | 63.7                  |
| W   | Thyroid                    | Urinary Bladder                  | 43042          | 9                             | 0.3                               | 0.03                                  | 11.7                          | 0.77 (0.35 to 1.46)    | 46.4            | 74.4                  |
| W   | Thyroid                    | Vulva and Other Genital Organs   | 43042          | 5                             | 0.1                               | 0.02                                  | 6.1                           | 0.82 (0.27 to 1.91)    | 46.4            | 66.0                  |
| W   | Urinary Bladder            | Acute Non-lymphocytic Leukemia   | 15578          | 16                            | 1.5                               | 0.06                                  | 14.8                          | 1.08 (0.62 to 1.76)    | 66.4            | 79.7                  |
| W   | Urinary Bladder            | Brain and Other Nervous System   | 15578          | 18                            | 1.6                               | 0.06                                  | 14.9                          | 1.21 (0.72 to 1.91)    | 66.4            | 77.4                  |
| W   | Urinary Bladder            | Breast                           | 15578          | 72                            | 6.6                               | 0.26                                  | 102.3                         | 0.7 (0.55 to 0.89)     | 66.4            | 77.0                  |
| W   | Urinary Bladder            | Cervix Uteri                     | 15578          | 7                             | 0.6                               | 0.03                                  | 6.1                           | 1.15 (0.46 to 2.37)    | 66.4            | 73.1                  |
| W   | Urinary Bladder            | Colon and Rectum                 | 15578          | 71                            | 6.5                               | 0.26                                  | 81.2                          | 0.87 (0.68 to 1.1)     | 66.4            | 81.7                  |
| W   | Urinary Bladder            | Corpus and Uterus, NOS           | 15578          | 18                            | 1.6                               | 0.06                                  | 22.7                          | 0.79 (0.47 to 1.25)    | 66.4            | 74.3                  |
| W   | Urinary Bladder            | Esophagus                        | 15578          | 11                            | 1.0                               | 0.04                                  | 9.0                           | 1.22 (0.61 to 2.18)    | 66.4            | 78.8                  |
| W   | Urinary Bladder            | Gallbladder and Other Biliary    | 15578          | 13                            | 1.2                               | 0.05                                  | 7.1                           | 1.82 (0.97 to 3.11)    | 66.4            | 82.5                  |
| W   | Urinary Bladder            | Kidney and Renal Pelvis          | 15578          | 36                            | 3.3                               | 0.13                                  | 14.9                          | 2.42 (1.7 to 3.35)     | 66.4            | 79.4                  |

| Sex | First Primary Cancer (FPC)     | Subsequent Primary Cancer (SPC)  | Survivors, No. | Observed Number of SPC Deaths | Mortality per 10,000 person-years | % Contribution to the Total Mortality | Expected Number of SPC Deaths | SMR (95% CI)          | Mean Age at FPC | Mean Age at SPC Death |
|-----|--------------------------------|----------------------------------|----------------|-------------------------------|-----------------------------------|---------------------------------------|-------------------------------|-----------------------|-----------------|-----------------------|
| W   | Urinary Bladder                | Liver and Intrahepatic Bile Duct | 15578          | 22                            | 2.0                               | 0.08                                  | 20.5                          | 1.07 (0.67 to 1.63)   | 66.4            | 79.6                  |
| W   | Urinary Bladder                | Lung and Bronchus                | 15578          | 511                           | 46.8                              | 1.84                                  | 210.1                         | 2.43 (2.23 to 2.65)   | 66.4            | 77.3                  |
| W   | Urinary Bladder                | Melanoma of the Skin             | 15578          | 5                             | 0.5                               | 0.02                                  | 8.0                           | 0.63 (0.2 to 1.46)    | 66.4            | 78.3                  |
| W   | Urinary Bladder                | Myeloma                          | 15578          | 20                            | 1.8                               | 0.07                                  | 16.9                          | 1.18 (0.72 to 1.83)   | 66.4            | 82.5                  |
| W   | Urinary Bladder                | Non-Hodgkin Lymphoma             | 15578          | 39                            | 3.6                               | 0.14                                  | 40.0                          | 0.97 (0.69 to 1.33)   | 66.4            | 80.1                  |
| W   | Urinary Bladder                | Oral Cavity and Pharynx          | 15578          | 8                             | 0.7                               | 0.03                                  | 7.8                           | 1.03 (0.45 to 2.03)   | 66.4            | 75.0                  |
| W   | Urinary Bladder                | Ovary                            | 15578          | 45                            | 4.1                               | 0.16                                  | 40.1                          | 1.12 (0.82 to 1.5)    | 66.4            | 76.7                  |
| W   | Urinary Bladder                | Pancreas                         | 15578          | 71                            | 6.5                               | 0.26                                  | 57.9                          | 1.23 (0.96 to 1.55)   | 66.4            | 78.2                  |
| W   | Urinary Bladder                | Soft Tissue including Heart      | 15578          | 6                             | 0.5                               | 0.02                                  | 4.6                           | 1.3 (0.48 to 2.83)    | 66.4            | 73.7                  |
| W   | Urinary Bladder                | Stomach                          | 15578          | 19                            | 1.7                               | 0.07                                  | 14.0                          | 1.36 (0.82 to 2.12)   | 66.4            | 78.1                  |
| W   | Urinary Bladder                | Vulva and Other Genital Organs   | 15578          | 9                             | 0.8                               | 0.03                                  | 6.0                           | 1.5 (0.69 to 2.85)    | 66.4            | 78.1                  |
| W   | Vulva and Other Genital Organs | Acute Non-lymphocytic Leukemia   | 6035           | 6                             | 1.4                               | 0.02                                  | 4.0                           | 1.49 (0.55 to 3.23)   | 58.9            | 69.4                  |
| W   | Vulva and Other Genital Organs | Anus, Anal Canal and Anorectum   | 6035           | 5                             | 1.2                               | 0.02                                  | 0.4                           | 13.73 (4.46 to 32.04) | 58.9            | 75.7                  |
| W   | Vulva and Other Genital Organs | Brain and Other Nervous System   | 6035           | 8                             | 1.8                               | 0.03                                  | 4.5                           | 1.77 (0.77 to 3.49)   | 58.9            | 71.9                  |
| W   | Vulva and Other Genital Organs | Breast                           | 6035           | 31                            | 7.1                               | 0.11                                  | 30.7                          | 1.01 (0.69 to 1.43)   | 58.9            | 68.2                  |
| W   | Vulva and Other Genital Organs | Cervix Uteri                     | 6035           | 17                            | 3.9                               | 0.06                                  | 2.2                           | 7.57 (4.41 to 12.13)  | 58.9            | 69.2                  |
| W   | Vulva and Other Genital Organs | Colon and Rectum                 | 6035           | 25                            | 5.8                               | 0.09                                  | 22.1                          | 1.13 (0.73 to 1.67)   | 58.9            | 73.2                  |
| W   | Vulva and Other Genital Organs | Corpus and Uterus, NOS           | 6035           | 27                            | 6.2                               | 0.10                                  | 6.9                           | 3.94 (2.6 to 5.73)    | 58.9            | 70.4                  |
| W   | Vulva and Other Genital Organs | Liver and Intrahepatic Bile Duct | 6035           | 7                             | 1.6                               | 0.03                                  | 5.9                           | 1.19 (0.48 to 2.45)   | 58.9            | 75.3                  |
| W   | Vulva and Other Genital Organs | Lung and Bronchus                | 6035           | 119                           | 27.4                              | 0.43                                  | 59.0                          | 2.02 (1.67 to 2.41)   | 58.9            | 71.8                  |
| W   | Vulva and Other Genital Organs | Melanoma of the Skin             | 6035           | 23                            | 5.3                               | 0.08                                  | 2.3                           | 10.14 (6.43 to 15.22) | 58.9            | 69.1                  |
| W   | Vulva and Other Genital Organs | Non-Hodgkin Lymphoma             | 6035           | 8                             | 1.8                               | 0.03                                  | 10.3                          | 0.77 (0.33 to 1.52)   | 58.9            | 72.0                  |
| W   | Vulva and Other Genital Organs | Oral Cavity and Pharynx          | 6035           | 10                            | 2.3                               | 0.04                                  | 2.2                           | 4.57 (2.19 to 8.4)    | 58.9            | 65.6                  |
| W   | Vulva and Other Genital Organs | Ovary                            | 6035           | 87                            | 20.0                              | 0.31                                  | 11.6                          | 7.49 (6 to 9.24)      | 58.9            | 71.2                  |
| W   | Vulva and Other Genital Organs | Pancreas                         | 6035           | 14                            | 3.2                               | 0.05                                  | 16.0                          | 0.88 (0.48 to 1.47)   | 58.9            | 77.2                  |
| W   | Vulva and Other Genital Organs | Soft Tissue including Heart      | 6035           | 16                            | 3.7                               | 0.06                                  | 1.4                           | 11.32 (6.47 to 18.38) | 58.9            | 67.1                  |
| W   | Vulva and Other Genital Organs | Urinary Bladder                  | 6035           | 8                             | 1.8                               | 0.03                                  | 4.0                           | 1.98 (0.86 to 3.91)   | 58.9            | 81.9                  |



**eTable 8.** Percentage contribution of each subsequent primary cancer types to the total incidence of subsequent primary cancer and to the total subsequent primary cancer mortality among all 5-year cancer survivors by sex in 12 SEER registries

| <b>Incidence</b>                              |                                               |                                   |              |                                               |                                               |                                   |              |
|-----------------------------------------------|-----------------------------------------------|-----------------------------------|--------------|-----------------------------------------------|-----------------------------------------------|-----------------------------------|--------------|
| <i>Men</i>                                    |                                               |                                   |              | <i>Women</i>                                  |                                               |                                   |              |
| Subsequent Primary Cancer                     | Observed number of Subsequent Primary Cancers | Incidence per 10,000 person-years | Incidence, % | Subsequent Primary Cancer                     | Observed number of Subsequent Primary Cancers | Incidence per 10,000 person-years | Incidence, % |
| Total person-years                            | 5648059                                       |                                   |              | Total person-years <sup>a</sup>               | 5427488                                       |                                   |              |
| Total subsequent primary cancers <sup>a</sup> | 88703                                         | 157.1                             | 100          | Total subsequent primary cancers <sup>a</sup> | 59041                                         | 108.8                             | 100          |
| Lung and Bronchus                             | 16913                                         | 29.9                              | 19.1         | Lung and Bronchus                             | 11375                                         | 21.0                              | 19.3         |
| Prostate                                      | 12115                                         | 21.4                              | 13.7         | Breast                                        | 10240                                         | 18.9                              | 17.3         |
| Urinary Bladder                               | 9809                                          | 17.4                              | 11.1         | Colon and Rectum                              | 6514                                          | 12.0                              | 11.0         |
| Colon and Rectum                              | 8987                                          | 15.9                              | 10.1         | Corpus and Uterus, NOS                        | 4351                                          | 8.0                               | 7.4          |
| Non-Hodgkin Lymphoma                          | 6694                                          | 11.9                              | 7.5          | Non-Hodgkin Lymphoma                          | 3673                                          | 6.8                               | 6.2          |
| Melanoma of the Skin                          | 5559                                          | 9.8                               | 6.3          | Pancreas                                      | 2489                                          | 4.6                               | 4.2          |
| Kidney and Renal Pelvis                       | 4363                                          | 7.7                               | 4.9          | Melanoma of the Skin                          | 2270                                          | 4.2                               | 3.8          |
| Pancreas                                      | 3419                                          | 6.1                               | 3.9          | Urinary Bladder                               | 2128                                          | 3.9                               | 3.6          |
| Oral Cavity and Pharynx                       | 2955                                          | 5.2                               | 3.3          | Kidney and Renal Pelvis                       | 1820                                          | 3.4                               | 3.1          |
| Stomach                                       | 2331                                          | 4.1                               | 2.6          | Thyroid                                       | 1731                                          | 3.2                               | 2.9          |
| Myeloma                                       | 2018                                          | 3.6                               | 2.3          | Ovary                                         | 1704                                          | 3.1                               | 2.9          |
| Liver and Intrahepatic Bile Duct              | 1919                                          | 3.4                               | 2.2          | Oral Cavity and Pharynx                       | 1438                                          | 2.6                               | 2.3          |
| Esophagus                                     | 1860                                          | 3.3                               | 2.1          | Stomach                                       | 1092                                          | 2.0                               | 1.8          |
| Acute Non-Lymphocytic Leukemia                | 1630                                          | 2.9                               | 1.8          | Acute Non-Lymphocytic Leukemia                | 998                                           | 1.8                               | 1.7          |
| Larynx                                        | 1161                                          | 2.1                               | 1.3          | Myeloma                                       | 970                                           | 1.8                               | 1.6          |
| Brain and Other Nervous System                | 1094                                          | 1.9                               | 1.2          | Vulva and Other Genital Organs                | 967                                           | 1.8                               | 1.6          |
| Thyroid                                       | 982                                           | 1.7                               | 1.1          | Liver and Intrahepatic Bile Duct              | 829                                           | 1.5                               | 1.4          |
| Soft Tissue including Heart                   | 871                                           | 1.5                               | 1.0          | Soft Tissue including Heart                   | 611                                           | 1.1                               | 1.0          |
| Gallbladder and Other Biliary                 | 780                                           | 1.4                               | 0.9          | Brain and Other Nervous System                | 594                                           | 1.1                               | 1.0          |
| Small Intestine                               | 750                                           | 1.3                               | 0.8          | Gallbladder and Other Biliary                 | 557                                           | 1.0                               | 0.9          |
| Chronic Myeloid Leukemia                      | 505                                           | 0.9                               | 0.6          | Esophagus                                     | 476                                           | 0.9                               | 0.8          |
| Anus, Anal Canal and Anorectum                | 417                                           | 0.7                               | 0.5          | Small Intestine                               | 446                                           | 0.8                               | 0.8          |
| Hodgkin Lymphoma                              | 330                                           | 0.6                               | 0.4          | Anus, Anal Canal and Anorectum                | 356                                           | 0.7                               | 0.6          |
| Breast                                        | 310                                           | 0.5                               | 0.3          | Cervix Uteri                                  | 345                                           | 0.6                               | 0.6          |
| Penis and Other Genital Organs                | 280                                           | 0.5                               | 0.3          | Chronic Myeloid Leukemia                      | 285                                           | 0.5                               | 0.5          |
| Eye and Orbit                                 | 191                                           | 0.3                               | 0.2          | Larynx                                        | 226                                           | 0.4                               | 0.4          |
| Acute Lymphocytic Leukemia                    | 149                                           | 0.3                               | 0.2          | Hodgkin Lymphoma                              | 188                                           | 0.3                               | 0.3          |
| Bones and Joints                              | 143                                           | 0.3                               | 0.2          | Acute Lymphocytic Leukemia                    | 130                                           | 0.2                               | 0.2          |
| Testis                                        | 86                                            | 0.2                               | 0.1          | Eye and Orbit                                 | 115                                           | 0.2                               | 0.2          |
| Kaposi Sarcoma                                | 82                                            | 0.1                               | 0.1          | Bones and Joints                              | 109                                           | 0.2                               | 0.2          |
|                                               |                                               |                                   |              | Kaposi Sarcoma                                | 14                                            | 0.0                               | 0.0          |

**Mortality**

| <i>Men</i>                                           |                                                     |                                   |              | <i>Women</i>                                         |                                                     |                                   |              |
|------------------------------------------------------|-----------------------------------------------------|-----------------------------------|--------------|------------------------------------------------------|-----------------------------------------------------|-----------------------------------|--------------|
| Subsequent Primary Cancer                            | Observed number of Subsequent Primary Cancer Deaths | Mortality per 10,000 person-years | Mortality, % | Subsequent Primary Cancer                            | Observed number of Subsequent Primary Cancer Deaths | Mortality per 10,000 person-years | Mortality, % |
| Total person-years <sup>a</sup>                      | 5364982                                             |                                   |              | Total person-years <sup>a</sup>                      | 5608782                                             |                                   |              |
| Total subsequent primary cancers deaths <sup>a</sup> | 43993                                               | 82.0                              | 100          | Total subsequent primary cancers deaths <sup>a</sup> | 27707                                               | 49.4                              | 100          |
| Lung and Bronchus                                    | 14555                                               | 27.1                              | 33.1         | Lung and Bronchus                                    | 8656                                                | 15.4                              | 31.2         |
| Colon and Rectum                                     | 3878                                                | 7.2                               | 8.8          | Pancreas                                             | 2600                                                | 4.6                               | 9.4          |
| Pancreas                                             | 3761                                                | 7.0                               | 8.5          | Colon and Rectum                                     | 2450                                                | 4.4                               | 8.8          |
| Non-Hodgkin Lymphoma                                 | 2621                                                | 4.9                               | 6.0          | Breast                                               | 1614                                                | 2.9                               | 5.8          |
| Liver and Intrahepatic Bile Duct                     | 2105                                                | 3.9                               | 4.8          | Ovary                                                | 1579                                                | 2.8                               | 5.7          |
| Urinary Bladder                                      | 2090                                                | 3.9                               | 4.8          | Non-Hodgkin Lymphoma                                 | 1294                                                | 2.3                               | 4.7          |
| Esophagus                                            | 2075                                                | 3.9                               | 4.7          | Corpus and Uterus, NOS                               | 1116                                                | 2.0                               | 4.0          |
| Prostate                                             | 1832                                                | 3.4                               | 4.2          | Liver and Intrahepatic Bile Duct                     | 1033                                                | 1.8                               | 3.7          |
| Acute Non-lymphocytic Leukemia                       | 1628                                                | 3.0                               | 3.7          | Acute Non-lymphocytic Leukemia                       | 959                                                 | 1.7                               | 3.5          |
| Stomach                                              | 1352                                                | 2.5                               | 3.1          | Brain and Other Nervous System                       | 739                                                 | 1.3                               | 2.7          |
| Myeloma                                              | 1321                                                | 2.5                               | 3.0          | Stomach                                              | 717                                                 | 1.3                               | 2.6          |
| Kidney and Renal Pelvis                              | 1305                                                | 2.4                               | 3.0          | Myeloma                                              | 594                                                 | 1.1                               | 2.1          |
| Brain and Other Nervous System                       | 1227                                                | 2.3                               | 2.8          | Soft Tissue including Heart                          | 528                                                 | 0.9                               | 1.9          |
| Melanoma of the Skin                                 | 927                                                 | 1.7                               | 2.1          | Esophagus                                            | 515                                                 | 0.9                               | 1.9          |
| Oral Cavity and Pharynx                              | 860                                                 | 1.6                               | 2.0          | Urinary Bladder                                      | 511                                                 | 0.9                               | 1.8          |
| Soft Tissue including Heart                          | 559                                                 | 1.0                               | 1.3          | Kidney and Renal Pelvis                              | 476                                                 | 0.8                               | 1.7          |
| Larynx                                               | 518                                                 | 1.0                               | 1.2          | Melanoma of the Skin                                 | 415                                                 | 0.7                               | 1.5          |
| Gallbladder and Other Biliary                        | 296                                                 | 0.6                               | 0.7          | Oral Cavity and Pharynx                              | 334                                                 | 0.6                               | 1.2          |
| Small Intestine                                      | 178                                                 | 0.3                               | 0.4          | Gallbladder and Other Biliary                        | 272                                                 | 0.5                               | 1.0          |
| Bones and Joints                                     | 155                                                 | 0.3                               | 0.4          | Vulva and Other Genital Organs                       | 257                                                 | 0.5                               | 0.9          |
| Hodgkin Lymphoma                                     | 143                                                 | 0.3                               | 0.3          | Cervix Uteri                                         | 233                                                 | 0.4                               | 0.8          |
| Chronic Myeloid Leukemia                             | 140                                                 | 0.3                               | 0.3          | Bones and Joints                                     | 140                                                 | 0.2                               | 0.5          |
| Acute Lymphocytic Leukemia                           | 125                                                 | 0.2                               | 0.3          | Larynx                                               | 119                                                 | 0.2                               | 0.4          |
| Thyroid                                              | 103                                                 | 0.2                               | 0.2          | Small Intestine                                      | 115                                                 | 0.2                               | 0.4          |
| Anus, Anal Canal and Anorectum                       | 68                                                  | 0.1                               | 0.2          | Thyroid                                              | 115                                                 | 0.2                               | 0.4          |
| Breast                                               | 67                                                  | 0.1                               | 0.2          | Acute Lymphocytic Leukemia                           | 106                                                 | 0.2                               | 0.4          |
| Penis and Other Genital Organs                       | 47                                                  | 0.1                               | 0.1          | Hodgkin Lymphoma                                     | 90                                                  | 0.2                               | 0.3          |
| Eye and Orbit                                        | 41                                                  | 0.1                               | 0.1          | Chronic Myeloid Leukemia                             | 69                                                  | 0.1                               | 0.2          |
| Testis                                               | 16                                                  | 0.0                               | 0.0          | Anus, Anal Canal and Anorectum                       | 61                                                  | 0.1                               | 0.2          |

<sup>a</sup>Excluding other and unspecified primary cancer sites

**eTable 9.** Risk of developing smoking- or obesity-related subsequent primary cancers among smoking or obesity-related cancer survivors

| SEX                                                           | First primary cancer             | Survivors, No. | Observed number of subsequent primary cancers | Incidence per 10,000 person-years | Expected number of subsequent primary cancers | Standardized Incidence Ratio (95% CI) |
|---------------------------------------------------------------|----------------------------------|----------------|-----------------------------------------------|-----------------------------------|-----------------------------------------------|---------------------------------------|
| <i>Risk of developing any type of smoking-related cancers</i> |                                  |                |                                               |                                   |                                               |                                       |
| Men                                                           | Larynx                           | 9,107          | 1651                                          | 272                               | 671                                           | 2.46 (2.34 to 2.58)                   |
| Men                                                           | Oral Cavity and Pharynx          | 22,937         | 2101                                          | 135                               | 1265                                          | 1.66 (1.59 to 1.73)                   |
| Men                                                           | Esophagus                        | 2,746          | 263                                           | 173                               | 160                                           | 1.64 (1.45 to 1.86)                   |
| Men                                                           | Lung and Bronchus                | 20,874         | 1398                                          | 128                               | 914                                           | 1.53 (1.45 to 1.61)                   |
| Men                                                           | Acute Non-Lymphocytic Leukemia   | 1,907          | 90                                            | 64                                | 64                                            | 1.4 (1.13 to 1.72)                    |
| Men                                                           | Pancreas                         | 1,674          | 97                                            | 124                               | 70                                            | 1.38 (1.12 to 1.68)                   |
| Men                                                           | Urinary Bladder                  | 51,513         | 4846                                          | 139                               | 3538                                          | 1.37 (1.33 to 1.41)                   |
| Men                                                           | Kidney and Renal Pelvis          | 25,977         | 1980                                          | 118                               | 1501                                          | 1.32 (1.26 to 1.38)                   |
| Men                                                           | Stomach                          | 6,149          | 476                                           | 127                               | 380                                           | 1.25 (1.14 to 1.37)                   |
| Men                                                           | Colon and Rectum                 | 74,722         | 5186                                          | 102                               | 4804                                          | 1.08 (1.05 to 1.11)                   |
| Men                                                           | Liver and Intrahepatic Bile Duct | 3,629          | 119                                           | 73                                | 120                                           | 0.99 (0.82 to 1.18)                   |
| Women                                                         | Larynx                           | 2,096          | 379                                           | 275                               | 82                                            | 4.62 (4.17 to 5.11)                   |
| Women                                                         | Esophagus                        | 846            | 91                                            | 197                               | 30                                            | 2.99 (2.4 to 3.67)                    |
| Women                                                         | Oral Cavity and Pharynx          | 10,788         | 679                                           | 88                                | 367                                           | 1.85 (1.71 to 1.99)                   |
| Women                                                         | Pancreas                         | 1,675          | 76                                            | 86                                | 42                                            | 1.79 (1.41 to 2.25)                   |
| Women                                                         | Urinary Bladder                  | 15,717         | 1172                                          | 107                               | 716                                           | 1.64 (1.54 to 1.73)                   |
| Women                                                         | Kidney and Renal Pelvis          | 15,980         | 890                                           | 84                                | 561                                           | 1.59 (1.48 to 1.69)                   |
| Women                                                         | Lung and Bronchus                | 24,065         | 857                                           | 65                                | 571                                           | 1.5 (1.4 to 1.6)                      |
| Women                                                         | Liver and Intrahepatic Bile Duct | 1,458          | 48                                            | 70                                | 32                                            | 1.5 (1.1 to 1.98)                     |
| Women                                                         | Cervix Uteri                     | 20,153         | 761                                           | 40                                | 527                                           | 1.44 (1.34 to 1.55)                   |
| Women                                                         | Stomach                          | 4,518          | 179                                           | 65                                | 160                                           | 1.12 (0.96 to 1.29)                   |
| Women                                                         | Acute Non-Lymphocytic Leukemia   | 1,861          | 44                                            | 30                                | 40                                            | 1.11 (0.81 to 1.49)                   |
| Women                                                         | Colon and Rectum                 | 68,770         | 2560                                          | 54                                | 2365                                          | 1.08 (1.04 to 1.13)                   |
| <i>Risk of developing any type of obesity-related cancers</i> |                                  |                |                                               |                                   |                                               |                                       |
| Men                                                           | Gallbladder and Other Biliary    | 1,010          | 53                                            | 91                                | 26                                            | 2.04 (1.53 to 2.67)                   |
| Men                                                           | Pancreas                         | 1,674          | 47                                            | 60                                | 29                                            | 1.64 (1.2 to 2.18)                    |
| Men                                                           | Thyroid                          | 12,442         | 307                                           | 31                                | 259                                           | 1.19 (1.06 to 1.33)                   |
| Men                                                           | Stomach Cardia                   | 1,651          | 48                                            | 51                                | 42                                            | 1.14 (0.84 to 1.51)                   |
| Men                                                           | Esophageal Adenocarcinoma        | 1,892          | 52                                            | 49                                | 47                                            | 1.11 (0.83 to 1.45)                   |
| Men                                                           | Colon and Rectum                 | 74,722         | 1581                                          | 31                                | 1479                                          | 1.07 (1.02 to 1.12)                   |
| Men                                                           | Kidney and Renal Pelvis          | 25,977         | 626                                           | 37                                | 598                                           | 1.05 (0.97 to 1.13)                   |
| Men                                                           | Multiple Myeloma                 | 5,908          | 93                                            | 38                                | 101                                           | 0.92 (0.74 to 1.12)                   |
| Men                                                           | Liver and Intrahepatic Bile Duct | 3,629          | 43                                            | 26                                | 52                                            | 0.83 (0.6 to 1.12)                    |
| Women                                                         | Stomach Cardia                   | 463            | 29                                            | 117                               | 20                                            | 1.44 (0.96 to 2.06)                   |
| Women                                                         | Pancreas                         | 1,675          | 74                                            | 84                                | 61                                            | 1.22 (0.96 to 1.54)                   |
| Women                                                         | Gallbladder and Other Biliary    | 1,314          | 78                                            | 96                                | 67                                            | 1.17 (0.93 to 1.46)                   |
| Women                                                         | Thyroid                          | 43,436         | 1829                                          | 52                                | 1644                                          | 1.11 (1.06 to 1.17)                   |
| Women                                                         | Kidney and Renal Pelvis          | 15,980         | 875                                           | 83                                | 791                                           | 1.11 (1.03 to 1.18)                   |
| Women                                                         | Corpus and Uterus, NOS           | 62,859         | 3840                                          | 78                                | 3600                                          | 1.07 (1.03 to 1.1)                    |
| Women                                                         | Breast                           | 334,273        | 11158                                         | 42                                | 10569                                         | 1.06 (1.04 to 1.08)                   |
| Women                                                         | Ovary                            | 18,169         | 864                                           | 66                                | 834                                           | 1.04 (0.97 to 1.11)                   |
| Women                                                         | Colon and Rectum                 | 68,770         | 3310                                          | 70                                | 3233                                          | 1.02 (0.99 to 1.06)                   |
| Women                                                         | Multiple Myeloma                 | 5,163          | 148                                           | 68                                | 171                                           | 0.87 (0.73 to 1.02)                   |
| Women                                                         | Esophageal Adenocarcinoma        | 294            | 11                                            | 71                                | 13                                            | 0.82 (0.41 to 1.46)                   |
| Women                                                         | Liver and Intrahepatic Bile Duct | 1,458          | 35                                            | 51                                | 47                                            | 0.75 (0.52 to 1.04)                   |

**eTable 10.** Standardized incidence ratio (SIR) and ratios of standardized ratios (RR) by diagnosis year (1975-1989, 1990-1999, 2000-2011) for the risk of select 6 subsequent primary cancers among 5-year survivors of 16 first primary cancer types in 9 SEER registries

| Sex | First primary cancer   | Subsequent primary cancer | 1975-1999, SIR |                         |      |                         | 2000-2011, SIR |                         |         |                        | 1975-1989, RR (ref)    |         |  | P <sub>trend</sub> <sup>a</sup> |
|-----|------------------------|---------------------------|----------------|-------------------------|------|-------------------------|----------------|-------------------------|---------|------------------------|------------------------|---------|--|---------------------------------|
|     |                        |                           | Obs.           | 1975-1999, SIR (95% CI) | Obs. | 1990-1999, SIR (95% CI) | Obs.           | 2000-2011, SIR (95% CI) | Obs.    | 1990-1999, RR (95% CI) | 2000-2011, RR (95% CI) |         |  |                                 |
| W   | Cervix Uteri           | ANLL                      | 12             | 0.74 (0.38-1.28)        | 4    | 0.6 (0.17-1.52)         | 4              | 1.58 (0.43-4.03)        | 1 (ref) | 1.46 (0.48-2.43)       | 2.11 (0.69-3.53)       | 0.28    |  |                                 |
| W   | Cervix Uteri           | Colon and Rectum          | 306            | 1.34 (1.19-1.49)        | 106  | 1.32 (1.08-1.6)         | 36             | 1.35 (0.95-1.87)        | 1 (ref) | 1.08 (0.91-1.24)       | 1.15 (0.97-1.33)       | 0.39    |  |                                 |
| W   | Cervix Uteri           | Corpus and Uterus, NOS    | 53             | 0.39 (0.29-0.5)         | 30   | 0.48 (0.33-0.69)        | 13             | 0.54 (0.29-0.91)        | 1 (ref) | 1.03 (0.73-1.33)       | 1.06 (0.75-1.37)       | 0.85    |  |                                 |
| W   | Cervix Uteri           | Lung and Bronchus         | 478            | 1.67 (1.52-1.83)        | 204  | 1.86 (1.62-2.14)        | 84             | 2.26 (1.81-2.8)         | 1 (ref) | 0.99 (0.88-1.1)        | 0.98 (0.87-1.09)       | 0.82    |  |                                 |
| W   | Cervix Uteri           | Oral Cavity and Pharynx   | 46             | 1.35 (0.99-1.8)         | 25   | 1.82 (1.18-2.68)        | 5              | 0.97 (0.32-2.26)        | 1 (ref) | 1.03 (0.66-1.4)        | 1.06 (0.68-1.43)       | 0.89    |  |                                 |
| W   | Cervix Uteri           | Urinary Bladder           | 107            | 2.11 (1.73-2.55)        | 39   | 2.11 (1.5-2.88)         | 10             | 1.62 (0.78-2.98)        | 1 (ref) | 0.98 (0.71-1.25)       | 0.95 (0.69-1.21)       | 0.85    |  |                                 |
| M   | Colon and Rectum       | ANLL                      | 76             | 0.88 (0.7-1.11)         | 66   | 1.07 (0.83-1.35)        | 58             | 1.41 (1.07-1.83)        | 1 (ref) | 1.16 (0.96-1.37)       | 1.35 (1.11-1.59)       | 0.11    |  |                                 |
| T   | Colon and Rectum       | ANLL                      | 126            | 0.9 (0.75-1.07)         | 108  | 1.11 (0.91-1.34)        | 71             | 1.11 (0.87-1.4)         | 1 (ref) | 1.08 (0.92-1.23)       | 1.15 (0.98-1.32)       | 0.36    |  |                                 |
| W   | Colon and Rectum       | ANLL                      | 50             | 0.91 (0.68-1.2)         | 42   | 1.19 (0.86-1.6)         | 13             | 0.57 (0.3-0.96)         | 1 (ref) | 0.91 (0.67-1.16)       | 0.83 (0.61-1.05)       | 0.48    |  |                                 |
| W   | Colon and Rectum       | Corpus and Uterus, NOS    | 386            | 1.24 (1.12-1.37)        | 232  | 1.22 (1.07-1.39)        | 210            | 1.51 (1.31-1.73)        | 1 (ref) | 1.1 (1-1.19)           | 1.2 (1.09-1.3)         | 0.06    |  |                                 |
| M   | Colon and Rectum       | Lung and Bronchus         | 1332           | 0.91 (0.86-0.96)        | 951  | 1.02 (0.95-1.08)        | 590            | 1.11 (1.02-1.2)         | 1 (ref) | 1.08 (1.03-1.13)       | 1.16 (1.1-1.21)        | 4.8E-03 |  |                                 |
| T   | Colon and Rectum       | Lung and Bronchus         | 2162           | 0.95 (0.91-0.99)        | 1582 | 1.05 (0.99-1.1)         | 1050           | 1.17 (1.1-1.24)         | 1 (ref) | 1.08 (1.03-1.12)       | 1.15 (1.11-1.19)       | 4.6E-04 |  |                                 |
| W   | Colon and Rectum       | Lung and Bronchus         | 830            | 1.02 (0.95-1.09)        | 631  | 1.09 (1.01-1.18)        | 460            | 1.25 (1.14-1.37)        | 1 (ref) | 1.07 (1.01-1.14)       | 1.15 (1.08-1.22)       | 0.03    |  |                                 |
| M   | Colon and Rectum       | Oral Cavity and Pharynx   | 199            | 0.95 (0.82-1.09)        | 139  | 0.99 (0.83-1.17)        | 125            | 1.21 (1-1.44)           | 1 (ref) | 1.09 (0.96-1.21)       | 1.18 (1.04-1.31)       | 0.18    |  |                                 |
| T   | Colon and Rectum       | Oral Cavity and Pharynx   | 279            | 0.91 (0.81-1.03)        | 181  | 0.92 (0.79-1.06)        | 172            | 1.22 (1.04-1.41)        | 1 (ref) | 1.11 (1-1.22)          | 1.22 (1.1-1.35)        | 0.05    |  |                                 |
| W   | Colon and Rectum       | Oral Cavity and Pharynx   | 80             | 0.84 (0.67-1.04)        | 42   | 0.74 (0.53-1)           | 47             | 1.25 (0.92-1.66)        | 1 (ref) | 1.18 (0.95-1.41)       | 1.39 (1.12-1.66)       | 0.11    |  |                                 |
| M   | Colon and Rectum       | Urinary Bladder           | 682            | 0.97 (0.9-1.04)         | 528  | 1.03 (0.94-1.12)        | 337            | 1.09 (0.98-1.21)        | 1 (ref) | 1.08 (1.01-1.15)       | 1.16 (1.08-1.24)       | 0.03    |  |                                 |
| T   | Colon and Rectum       | Urinary Bladder           | 883            | 0.99 (0.92-1.06)        | 664  | 1.05 (0.98-1.14)        | 423            | 1.12 (1.01-1.23)        | 1 (ref) | 1.08 (1.02-1.14)       | 1.16 (1.09-1.23)       | 0.02    |  |                                 |
| W   | Colon and Rectum       | Urinary Bladder           | 201            | 1.07 (0.93-1.23)        | 136  | 1.16 (0.97-1.37)        | 86             | 1.23 (0.98-1.52)        | 1 (ref) | 1.08 (0.94-1.22)       | 1.15 (1-1.3)           | 0.29    |  |                                 |
| W   | Corpus and Uterus, NOS | ANLL                      | 79             | 1.13 (0.9-1.41)         | 48   | 1.41 (1.04-1.87)        | 35             | 1.71 (1.2-2.38)         | 1 (ref) | 1.2 (0.95-1.45)        | 1.44 (1.14-1.74)       | 0.09    |  |                                 |
| W   | Corpus and Uterus, NOS | Colon and Rectum          | 1290           | 1.15 (1.09-1.21)        | 555  | 1.31 (1.2-1.42)         | 284            | 1.44 (1.27-1.61)        | 1 (ref) | 1.14 (1.07-1.21)       | 1.29 (1.2-1.37)        | 1.2E-04 |  |                                 |
| W   | Corpus and Uterus, NOS | Lung and Bronchus         | 842            | 0.74 (0.7-0.8)          | 398  | 0.68 (0.61-0.75)        | 242            | 0.72 (0.63-0.81)        | 1 (ref) | 0.93 (0.86-0.99)       | 0.85 (0.79-0.91)       | 0.03    |  |                                 |
| W   | Corpus and Uterus, NOS | Oral Cavity and Pharynx   | 114            | 0.88 (0.73-1.06)        | 53   | 0.91 (0.69-1.19)        | 29             | 0.8 (0.54-1.15)         | 1 (ref) | 0.97 (0.78-1.16)       | 0.93 (0.75-1.12)       | 0.71    |  |                                 |
| W   | Corpus and Uterus, NOS | Urinary Bladder           | 375            | 1.55 (1.4-1.72)         | 153  | 1.36 (1.15-1.59)        | 73             | 1.2 (0.94-1.51)         | 1 (ref) | 0.94 (0.83-1.06)       | 0.88 (0.77-0.99)       | 0.29    |  |                                 |
| W   | Female Breast          | ANLL                      | 253            | 1.38 (1.22-1.57)        | 211  | 1.35 (1.17-1.54)        | 169            | 1.71 (1.46-1.98)        | 1 (ref) | 1.07 (0.95-1.18)       | 1.13 (1.01-1.25)       | 0.28    |  |                                 |
| W   | Female Breast          | Colon and Rectum          | 2612           | 0.94 (0.9-0.97)         | 1853 | 0.95 (0.91-1)           | 983            | 0.99 (0.93-1.06)        | 1 (ref) | 1 (0.97-1.04)          | 1 (0.97-1.04)          | 0.95    |  |                                 |
| W   | Female Breast          | Corpus and Uterus, NOS    | 1481           | 1.21 (1.15-1.28)        | 1557 | 1.46 (1.39-1.53)        | 859            | 1.15 (1.07-1.23)        | 1 (ref) | 0.95 (0.91-0.99)       | 0.9 (0.86-0.94)        | 0.01    |  |                                 |
| W   | Female Breast          | Lung and Bronchus         | 3053           | 0.99 (0.96-1.03)        | 2958 | 1.1 (1.06-1.14)         | 1843           | 1.14 (1.09-1.19)        | 1 (ref) | 1.1 (1.07-1.14)        | 1.21 (1.17-1.25)       | 8.7E-09 |  |                                 |
| W   | Female Breast          | Oral Cavity and Pharynx   | 348            | 1.01 (0.91-1.13)        | 325  | 1.18 (1.06-1.32)        | 255            | 1.44 (1.27-1.62)        | 1 (ref) | 1.2 (1.09-1.3)         | 1.42 (1.3-1.55)        | 8.3E-05 |  |                                 |
| W   | Female Breast          | Urinary Bladder           | 725            | 1.17 (1.09-1.26)        | 538  | 1.06 (0.97-1.16)        | 325            | 1.12 (1-1.24)           | 1 (ref) | 0.98 (0.92-1.05)       | 0.96 (0.9-1.03)        | 0.56    |  |                                 |
| M   | Hodgkin Lymphoma       | ANLL                      | 36             | 9.84 (6.89-13.6)        | 12   | 5.37 (2.78-9.37)        | 9              | 6.77 (3.1-12.85)        | 1 (ref) | 0.53 (0.34-0.72)       | 0.28 (0.18-0.38)       | 6.3E-04 |  |                                 |
| T   | Hodgkin Lymphoma       | ANLL                      | 56             | 9.66 (7.3-12.54)        | 17   | 4.68 (2.73-7.49)        | 14             | 6.52 (3.57-10.94)       | 1 (ref) | 0.53 (0.37-0.69)       | 0.28 (0.2-0.37)        | 4.1E-05 |  |                                 |
| W   | Hodgkin Lymphoma       | ANLL                      | 20             | 9.36 (5.72-14.5)        | 5    | 3.58 (1.16-8.34)        | 5              | 6.12 (1.99-14.26)       | 1 (ref) | 0.55 (0.25-0.84)       | 0.3 (0.14-0.46)        | 0.03    |  |                                 |
| M   | Hodgkin Lymphoma       | Colon and Rectum          | 63             | 1.48 (1.14-1.89)        | 33   | 1.41 (0.97-1.98)        | 10             | 0.85 (0.41-1.55)        | 1 (ref) | 0.88 (0.62-1.14)       | 0.77 (0.54-1)          | 0.39    |  |                                 |
| T   | Hodgkin Lymphoma       | Colon and Rectum          | 117            | 1.72 (1.43-2.07)        | 64   | 1.65 (1.27-2.11)        | 16             | 0.82 (0.47-1.33)        | 1 (ref) | 0.86 (0.67-1.06)       | 0.74 (0.58-0.91)       | 0.19    |  |                                 |
| W   | Hodgkin Lymphoma       | Colon and Rectum          | 54             | 2.15 (1.61-2.8)         | 31   | 2.02 (1.38-2.87)        | 6              | 0.77 (0.29-1.68)        | 1 (ref) | 0.85 (0.56-1.13)       | 0.71 (0.47-0.95)       | 0.32    |  |                                 |
| W   | Hodgkin Lymphoma       | Corpus and Uterus, NOS    | 33             | 1.59 (1.1-2.23)         | 18   | 1.4 (0.83-2.22)         | 5              | 0.75 (0.25-1.75)        | 1 (ref) | 0.67 (0.39-0.96)       | 0.45 (0.26-0.64)       | 0.06    |  |                                 |
| M   | Hodgkin Lymphoma       | Lung and Bronchus         | 218            | 3.66 (3.19-4.18)        | 71   | 2.35 (1.84-2.97)        | 31             | 2.08 (1.41-2.94)        | 1 (ref) | 0.85 (0.7-1.01)        | 0.73 (0.59-0.86)       | 0.09    |  |                                 |
| T   | Hodgkin Lymphoma       | Lung and Bronchus         | 335            | 3.68 (3.3-4.1)          | 144  | 2.9 (2.45-3.41)         | 43             | 1.7 (1.23-2.29)         | 1 (ref) | 0.81 (0.69-0.93)       | 0.65 (0.56-0.75)       | 3.4E-03 |  |                                 |

| Sex | First primary cancer    | Subsequent primary cancer | 1975-1999, SIR |                  | 1990-1999, SIR |                  | 2000-2011, SIR |                   | 1975-1989, RR (ref) | 1990-1999, RR (95% CI) | 2000-2011, RR (95% CI) | P <sub>trend</sub> <sup>a</sup> |
|-----|-------------------------|---------------------------|----------------|------------------|----------------|------------------|----------------|-------------------|---------------------|------------------------|------------------------|---------------------------------|
|     |                         |                           | Obs.           | (95% CI)         | Obs.           | (95% CI)         | Obs.           | (95% CI)          |                     |                        |                        |                                 |
| W   | Hodgkin Lymphoma        | Lung and Bronchus         | 117            | 3.72 (3.08-4.46) | 73             | 3.74 (2.94-4.71) | 12             | 1.16 (0.6-2.03)   | 1 (ref)             | 0.73 (0.57-0.9)        | 0.54 (0.41-0.66)       | 7.1E-03                         |
| M   | Hodgkin Lymphoma        | Oral Cavity and Pharynx   | 28             | 1.69 (1.13-2.45) | 23             | 2.47 (1.57-3.71) | 9              | 1.71 (0.78-3.24)  | 1 (ref)             | 1.02 (0.65-1.39)       | 1.04 (0.66-1.41)       | 0.93                            |
| T   | Hodgkin Lymphoma        | Oral Cavity and Pharynx   | 51             | 2.41 (1.8-3.17)  | 34             | 2.79 (1.94-3.9)  | 17             | 2.5 (1.46-4)      | 1 (ref)             | 1 (0.72-1.29)          | 1 (0.72-1.29)          | 1.00                            |
| W   | Hodgkin Lymphoma        | Oral Cavity and Pharynx   | 23             | 4.97 (3.15-7.46) | 11             | 3.83 (1.91-6.85) | 8              | 5.19 (2.25-10.23) | 1 (ref)             | 0.97 (0.54-1.41)       | 0.94 (0.52-1.37)       | 0.89                            |
| M   | Hodgkin Lymphoma        | Urinary Bladder           | 31             | 1.16 (0.79-1.65) | 24             | 1.54 (0.99-2.28) | 10             | 1.2 (0.58-2.2)    | 1 (ref)             | 1.07 (0.67-1.46)       | 1.13 (0.72-1.55)       | 0.75                            |
| T   | Hodgkin Lymphoma        | Urinary Bladder           | 39             | 1.21 (0.86-1.65) | 31             | 1.63 (1.11-2.31) | 15             | 1.47 (0.82-2.42)  | 1 (ref)             | 1.16 (0.79-1.53)       | 1.33 (0.91-1.76)       | 0.39                            |
| W   | Hodgkin Lymphoma        | Urinary Bladder           | 8              | 1.41 (0.61-2.78) | 7              | 2.04 (0.83-4.21) | 5              | 2.7 (0.88-6.3)    | 1 (ref)             | 1.49 (0.5-2.48)        | 2.21 (0.74-3.68)       | 0.25                            |
| M   | Kidney and Renal Pelvis | ANLL                      | 14             | 0.98 (0.54-1.64) | 14             | 1.07 (0.59-1.79) | 12             | 0.89 (0.46-1.55)  | 1 (ref)             | 1.06 (0.61-1.52)       | 1.12 (0.64-1.6)        | 0.80                            |
| T   | Kidney and Renal Pelvis | ANLL                      | 18             | 0.91 (0.54-1.44) | 19             | 1.03 (0.62-1.61) | 22             | 1.16 (0.73-1.76)  | 1 (ref)             | 1.22 (0.79-1.65)       | 1.47 (0.95-2)          | 0.29                            |
| W   | Kidney and Renal Pelvis | ANLL                      | 4              | 0.73 (0.2-1.86)  | 5              | 0.94 (0.31-2.18) | 10             | 1.84 (0.88-3.38)  | 1 (ref)             | 1.62 (0.56-2.69)       | 2.63 (0.9-4.36)        | 0.15                            |
| M   | Kidney and Renal Pelvis | Colon and Rectum          | 179            | 0.99 (0.85-1.14) | 107            | 0.81 (0.66-0.98) | 93             | 0.89 (0.72-1.09)  | 1 (ref)             | 0.87 (0.75-0.98)       | 0.75 (0.65-0.85)       | 0.03                            |
| T   | Kidney and Renal Pelvis | Colon and Rectum          | 272            | 1.01 (0.9-1.14)  | 190            | 0.95 (0.82-1.09) | 151            | 0.95 (0.81-1.11)  | 1 (ref)             | 0.92 (0.83-1.02)       | 0.85 (0.76-0.94)       | 0.11                            |
| W   | Kidney and Renal Pelvis | Colon and Rectum          | 93             | 1.07 (0.86-1.31) | 83             | 1.21 (0.96-1.5)  | 58             | 1.07 (0.82-1.39)  | 1 (ref)             | 1.03 (0.85-1.21)       | 1.06 (0.88-1.24)       | 0.76                            |
| W   | Kidney and Renal Pelvis | Corpus and Uterus, NOS    | 36             | 1 (0.7-1.38)     | 27             | 0.77 (0.51-1.12) | 43             | 1.13 (0.82-1.51)  | 1 (ref)             | 1.06 (0.8-1.33)        | 1.12 (0.84-1.41)       | 0.66                            |
| M   | Kidney and Renal Pelvis | Lung and Bronchus         | 300            | 1.17 (1.04-1.31) | 223            | 1.09 (0.95-1.24) | 195            | 1.11 (0.96-1.27)  | 1 (ref)             | 0.96 (0.86-1.05)       | 0.91 (0.82-1)          | 0.31                            |
| T   | Kidney and Renal Pelvis | Lung and Bronchus         | 406            | 1.17 (1.06-1.29) | 332            | 1.12 (1-1.24)    | 336            | 1.27 (1.14-1.41)  | 1 (ref)             | 1.01 (0.93-1.09)       | 1.02 (0.94-1.11)       | 0.81                            |
| W   | Kidney and Renal Pelvis | Lung and Bronchus         | 106            | 1.17 (0.96-1.41) | 109            | 1.18 (0.97-1.42) | 141            | 1.59 (1.34-1.88)  | 1 (ref)             | 1.15 (0.98-1.31)       | 1.31 (1.12-1.5)        | 0.07                            |
| M   | Kidney and Renal Pelvis | Oral Cavity and Pharynx   | 31             | 0.78 (0.53-1.1)  | 26             | 0.74 (0.48-1.08) | 39             | 1 (0.71-1.37)     | 1 (ref)             | 1.18 (0.87-1.49)       | 1.38 (1.02-1.75)       | 0.23                            |
| T   | Kidney and Renal Pelvis | Oral Cavity and Pharynx   | 40             | 0.8 (0.57-1.08)  | 43             | 0.97 (0.7-1.3)   | 51             | 1.06 (0.79-1.39)  | 1 (ref)             | 1.2 (0.93-1.46)        | 1.42 (1.1-1.74)        | 0.13                            |
| W   | Kidney and Renal Pelvis | Oral Cavity and Pharynx   | 9              | 0.88 (0.4-1.66)  | 17             | 1.84 (1.07-2.94) | 12             | 1.28 (0.67-2.24)  | 1 (ref)             | 1.22 (0.7-1.75)        | 1.49 (0.84-2.13)       | 0.37                            |
| M   | Kidney and Renal Pelvis | Urinary Bladder           | 128            | 1.08 (0.9-1.28)  | 129            | 1.19 (0.99-1.41) | 141            | 1.41 (1.19-1.66)  | 1 (ref)             | 1.06 (0.92-1.19)       | 1.11 (0.97-1.25)       | 0.46                            |
| T   | Kidney and Renal Pelvis | Urinary Bladder           | 152            | 1.11 (0.94-1.29) | 154            | 1.22 (1.04-1.43) | 164            | 1.41 (1.21-1.65)  | 1 (ref)             | 1.02 (0.9-1.15)        | 1.04 (0.92-1.17)       | 0.76                            |
| W   | Kidney and Renal Pelvis | Urinary Bladder           | 24             | 1.28 (0.82-1.91) | 25             | 1.43 (0.93-2.11) | 23             | 1.43 (0.91-2.14)  | 1 (ref)             | 0.87 (0.61-1.12)       | 0.75 (0.53-0.97)       | 0.33                            |
| M   | Larynx                  | ANLL                      | 16             | 1.06 (0.61-1.71) | 12             | 1.59 (0.82-2.77) | 6              | 1.4 (0.52-3.05)   | 1 (ref)             | 1.19 (0.65-1.74)       | 1.41 (0.77-2.06)       | 0.46                            |
| T   | Larynx                  | ANLL                      | 19             | 1.12 (0.68-1.75) | 13             | 1.51 (0.81-2.58) | 9              | 1.87 (0.86-3.55)  | 1 (ref)             | 1.29 (0.76-1.81)       | 1.65 (0.98-2.33)       | 0.23                            |
| W   | Larynx                  | ANLL                      | 3              | 1.68 (0.35-4.89) | 1              | 0.97 (0.03-5.39) | 3              | 5.61 (1.16-16.39) | 1 (ref)             | 1.77 (0.08-3.45)       | 3.12 (0.15-6.08)       | 0.24                            |
| M   | Larynx                  | Colon and Rectum          | 214            | 1.06 (0.93-1.21) | 111            | 1.4 (1.15-1.68)  | 39             | 1.18 (0.84-1.61)  | 1 (ref)             | 1.09 (0.93-1.25)       | 1.18 (1.01-1.36)       | 0.28                            |
| T   | Larynx                  | Colon and Rectum          | 245            | 1.06 (0.93-1.2)  | 133            | 1.43 (1.2-1.69)  | 53             | 1.38 (1.03-1.8)   | 1 (ref)             | 1.16 (1.01-1.32)       | 1.35 (1.17-1.53)       | 0.03                            |
| W   | Larynx                  | Colon and Rectum          | 31             | 1.05 (0.72-1.49) | 22             | 1.61 (1.01-2.43) | 14             | 2.61 (1.43-4.38)  | 1 (ref)             | 1.63 (1.1-2.17)        | 2.66 (1.78-3.54)       | 3.8E-03                         |
| W   | Larynx                  | Corpus and Uterus, NOS    | 14             | 1.07 (0.59-1.79) | 5              | 0.72 (0.24-1.67) | 2              | 0.5 (0.07-1.8)    | 1 (ref)             | 0.63 (0.22-1.05)       | 0.4 (0.14-0.66)        | 0.17                            |
| M   | Larynx                  | Lung and Bronchus         | 797            | 2.78 (2.59-2.98) | 444            | 3.58 (3.26-3.93) | 243            | 4.21 (3.69-4.77)  | 1 (ref)             | 1.22 (1.14-1.3)        | 1.48 (1.38-1.58)       | 4.5E-08                         |
| T   | Larynx                  | Lung and Bronchus         | 990            | 3.1 (2.91-3.3)   | 570            | 3.98 (3.66-4.33) | 343            | 5.12 (4.6-5.7)    | 1 (ref)             | 1.24 (1.16-1.31)       | 1.52 (1.43-1.62)       | 2.6E-11                         |
| W   | Larynx                  | Lung and Bronchus         | 193            | 5.96 (5.15-6.86) | 126            | 6.63 (5.52-7.89) | 100            | 10.93 (8.89-13.3) | 1 (ref)             | 1.3 (1.13-1.47)        | 1.69 (1.47-1.91)       | 9.1E-05                         |
| M   | Larynx                  | Oral Cavity and Pharynx   | 230            | 5.37 (4.7-6.11)  | 136            | 7 (5.88-8.28)    | 102            | 8.75 (7.14-10.6)  | 1 (ref)             | 1.32 (1.16-1.47)       | 1.73 (1.53-1.94)       | 5.5E-06                         |
| T   | Larynx                  | Oral Cavity and Pharynx   | 274            | 5.9 (5.22-6.64)  | 160            | 7.53 (6.41-8.79) | 132            | 10.49 (8.77-12.4) | 1 (ref)             | 1.36 (1.22-1.51)       | 1.85 (1.65-2.05)       | 1.9E-08                         |
| W   | Larynx                  | Oral Cavity and Pharynx   | 44             | 12.1 (8.76-16.2) | 24             | 13.2 (8.45-19.6) | 30             | 32.2 (21.73-46.0) | 1 (ref)             | 1.61 (1.2-2.02)        | 2.57 (1.91-3.23)       | 3.2E-04                         |
| M   | Larynx                  | Urinary Bladder           | 170            | 1.35 (1.15-1.56) | 90             | 1.42 (1.14-1.75) | 61             | 1.89 (1.45-2.43)  | 1 (ref)             | 1.15 (0.97-1.32)       | 1.31 (1.11-1.51)       | 0.08                            |
| T   | Larynx                  | Urinary Bladder           | 177            | 1.34 (1.15-1.55) | 92             | 1.38 (1.11-1.69) | 65             | 1.92 (1.48-2.44)  | 1 (ref)             | 1.15 (0.98-1.33)       | 1.33 (1.13-1.52)       | 0.07                            |
| W   | Larynx                  | Urinary Bladder           | 7              | 1.13 (0.46-2.32) | 2              | 0.59 (0.08-2.1)  | 4              | 2.49 (0.68-6.37)  | 1 (ref)             | 1.31 (0.33-2.29)       | 1.72 (0.44-3)          | 0.48                            |
| M   | Lung and Bronchus       | ANLL                      | 26             | 1.47 (0.96-2.15) | 16             | 1.33 (0.76-2.16) | 22             | 2.2 (1.38-3.32)   | 1 (ref)             | 1.21 (0.83-1.6)        | 1.47 (1-1.93)          | 0.24                            |
| T   | Lung and Bronchus       | ANLL                      | 40             | 1.53 (1.09-2.08) | 26             | 1.28 (0.84-1.87) | 44             | 2.51 (1.83-3.37)  | 1 (ref)             | 1.24 (0.93-1.54)       | 1.52 (1.15-1.89)       | 0.10                            |
| W   | Lung and Bronchus       | ANLL                      | 14             | 1.64 (0.9-2.75)  | 10             | 1.21 (0.58-2.22) | 22             | 2.93 (1.84-4.43)  | 1 (ref)             | 1.26 (0.77-1.76)       | 1.59 (0.96-2.21)       | 0.26                            |

| Sex | First primary cancer | Subsequent primary cancer | 1975-1999, SIR (95% CI) |                         | 1990-1999, SIR (95% CI) |                         | 2000-2011, SIR (95% CI) |                         | 1975-1989, RR (ref) | 1990-1999, RR (95% CI) | 2000-2011, RR (95% CI) | P <sub>trend</sub> <sup>a</sup> |
|-----|----------------------|---------------------------|-------------------------|-------------------------|-------------------------|-------------------------|-------------------------|-------------------------|---------------------|------------------------|------------------------|---------------------------------|
|     |                      |                           | 1975-1999, Obs.         | 1975-1999, SIR (95% CI) | 1990-1999, Obs.         | 1990-1999, SIR (95% CI) | 2000-2011, Obs.         | 2000-2011, SIR (95% CI) |                     |                        |                        |                                 |
| M   | Lung and Bronchus    | Colon and Rectum          | 277                     | 1.14 (1.01-1.28)        | 181                     | 1.41 (1.21-1.63)        | 103                     | 1.36 (1.11-1.65)        | 1 (ref)             | 1.13 (1.01-1.26)       | 1.28 (1.14-1.42)       | 0.03                            |
| T   | Lung and Bronchus    | Colon and Rectum          | 447                     | 1.17 (1.06-1.28)        | 335                     | 1.4 (1.26-1.56)         | 189                     | 1.26 (1.09-1.45)        | 1 (ref)             | 1.09 (1-1.18)          | 1.19 (1.09-1.29)       | 0.05                            |
| W   | Lung and Bronchus    | Colon and Rectum          | 170                     | 1.21 (1.04-1.41)        | 154                     | 1.4 (1.19-1.64)         | 86                      | 1.16 (0.93-1.43)        | 1 (ref)             | 1.04 (0.91-1.18)       | 1.08 (0.94-1.22)       | 0.59                            |
| W   | Lung and Bronchus    | Corpus and Uterus, NOS    | 40                      | 0.67 (0.48-0.91)        | 28                      | 0.55 (0.37-0.79)        | 29                      | 0.61 (0.41-0.88)        | 1 (ref)             | 0.96 (0.71-1.21)       | 0.93 (0.69-1.17)       | 0.76                            |
| M   | Lung and Bronchus    | Oral Cavity and Pharynx   | 94                      | 1.82 (1.47-2.23)        | 66                      | 2.19 (1.69-2.78)        | 51                      | 2.06 (1.53-2.7)         | 1 (ref)             | 1 (0.83-1.17)          | 1 (0.83-1.16)          | 0.95                            |
| T   | Lung and Bronchus    | Oral Cavity and Pharynx   | 128                     | 1.87 (1.56-2.22)        | 100                     | 2.26 (1.84-2.74)        | 75                      | 2.02 (1.59-2.53)        | 1 (ref)             | 0.99 (0.85-1.13)       | 0.98 (0.84-1.12)       | 0.86                            |
| W   | Lung and Bronchus    | Oral Cavity and Pharynx   | 34                      | 2.03 (1.4-2.83)         | 34                      | 2.4 (1.66-3.35)         | 24                      | 1.93 (1.24-2.87)        | 1 (ref)             | 0.99 (0.73-1.25)       | 0.98 (0.72-1.24)       | 0.92                            |
| M   | Lung and Bronchus    | Urinary Bladder           | 202                     | 1.39 (1.21-1.6)         | 161                     | 1.6 (1.36-1.87)         | 127                     | 1.68 (1.4-2)            | 1 (ref)             | 1.14 (1.01-1.27)       | 1.29 (1.14-1.44)       | 0.04                            |
| T   | Lung and Bronchus    | Urinary Bladder           | 265                     | 1.52 (1.34-1.71)        | 216                     | 1.68 (1.46-1.92)        | 178                     | 1.8 (1.55-2.09)         | 1 (ref)             | 1.09 (0.98-1.2)        | 1.19 (1.07-1.31)       | 0.10                            |
| W   | Lung and Bronchus    | Urinary Bladder           | 63                      | 2.13 (1.64-2.73)        | 55                      | 1.97 (1.49-2.57)        | 51                      | 2.22 (1.66-2.92)        | 1 (ref)             | 0.96 (0.77-1.15)       | 0.92 (0.74-1.1)        | 0.66                            |
| M   | Melanoma of the Skin | ANLL                      | 25                      | 0.78 (0.5-1.14)         | 31                      | 1.04 (0.71-1.47)        | 17                      | 0.69 (0.41-1.11)        | 1 (ref)             | 1.07 (0.71-1.44)       | 1.15 (0.76-1.53)       | 0.70                            |
| T   | Melanoma of the Skin | ANLL                      | 43                      | 0.8 (0.58-1.08)         | 37                      | 0.83 (0.58-1.14)        | 29                      | 0.82 (0.55-1.17)        | 1 (ref)             | 1 (0.73-1.27)          | 1 (0.73-1.27)          | 0.98                            |
| W   | Melanoma of the Skin | ANLL                      | 18                      | 0.84 (0.5-1.32)         | 6                       | 0.41 (0.15-0.88)        | 12                      | 1.1 (0.57-1.92)         | 1 (ref)             | 0.91 (0.5-1.31)        | 0.82 (0.45-1.19)       | 0.66                            |
| M   | Melanoma of the Skin | Colon and Rectum          | 273                     | 0.75 (0.67-0.84)        | 230                     | 0.82 (0.72-0.93)        | 138                     | 0.76 (0.64-0.9)         | 1 (ref)             | 0.93 (0.83-1.02)       | 0.85 (0.76-0.94)       | 0.13                            |
| T   | Melanoma of the Skin | Colon and Rectum          | 500                     | 0.77 (0.71-0.84)        | 366                     | 0.81 (0.73-0.9)         | 228                     | 0.8 (0.7-0.91)          | 1 (ref)             | 0.96 (0.88-1.04)       | 0.92 (0.84-0.99)       | 0.29                            |
| W   | Melanoma of the Skin | Colon and Rectum          | 227                     | 0.8 (0.7-0.91)          | 136                     | 0.8 (0.67-0.95)         | 90                      | 0.87 (0.7-1.06)         | 1 (ref)             | 1.02 (0.88-1.15)       | 1.03 (0.9-1.17)        | 0.85                            |
| W   | Melanoma of the Skin | Corpus and Uterus, NOS    | 123                     | 0.73 (0.61-0.87)        | 99                      | 0.83 (0.68-1.01)        | 68                      | 0.77 (0.6-0.98)         | 1 (ref)             | 1.02 (0.85-1.19)       | 1.03 (0.86-1.2)        | 0.88                            |
| M   | Melanoma of the Skin | Lung and Bronchus         | 357                     | 0.67 (0.61-0.75)        | 264                     | 0.61 (0.54-0.69)        | 196                     | 0.65 (0.57-0.75)        | 1 (ref)             | 0.93 (0.84-1.02)       | 0.86 (0.77-0.94)       | 0.10                            |
| T   | Melanoma of the Skin | Lung and Bronchus         | 653                     | 0.73 (0.67-0.79)        | 480                     | 0.71 (0.65-0.77)        | 321                     | 0.69 (0.61-0.77)        | 1 (ref)             | 0.93 (0.86-1)          | 0.86 (0.8-0.93)        | 0.04                            |
| W   | Melanoma of the Skin | Lung and Bronchus         | 296                     | 0.81 (0.72-0.9)         | 216                     | 0.87 (0.76-1)           | 125                     | 0.75 (0.62-0.89)        | 1 (ref)             | 0.94 (0.83-1.05)       | 0.88 (0.78-0.98)       | 0.26                            |
| M   | Melanoma of the Skin | Oral Cavity and Pharynx   | 74                      | 0.77 (0.61-0.97)        | 64                      | 0.73 (0.57-0.93)        | 61                      | 0.84 (0.64-1.08)        | 1 (ref)             | 1.03 (0.83-1.23)       | 1.06 (0.86-1.27)       | 0.78                            |
| T   | Melanoma of the Skin | Oral Cavity and Pharynx   | 121                     | 0.87 (0.73-1.04)        | 94                      | 0.81 (0.66-1)           | 85                      | 0.91 (0.73-1.13)        | 1 (ref)             | 1.06 (0.89-1.23)       | 1.11 (0.93-1.29)       | 0.53                            |
| W   | Melanoma of the Skin | Oral Cavity and Pharynx   | 47                      | 1.11 (0.82-1.48)        | 30                      | 1.07 (0.72-1.52)        | 24                      | 1.17 (0.75-1.74)        | 1 (ref)             | 1.11 (0.79-1.42)       | 1.22 (0.88-1.57)       | 0.50                            |
| M   | Melanoma of the Skin | Urinary Bladder           | 226                     | 0.83 (0.73-0.95)        | 201                     | 0.81 (0.7-0.93)         | 154                     | 0.82 (0.69-0.96)        | 1 (ref)             | 0.93 (0.82-1.04)       | 0.86 (0.76-0.96)       | 0.20                            |
| T   | Melanoma of the Skin | Urinary Bladder           | 277                     | 0.81 (0.72-0.91)        | 254                     | 0.86 (0.76-0.97)        | 184                     | 0.84 (0.72-0.97)        | 1 (ref)             | 0.97 (0.87-1.07)       | 0.93 (0.83-1.03)       | 0.48                            |
| W   | Melanoma of the Skin | Urinary Bladder           | 51                      | 0.73 (0.54-0.96)        | 53                      | 1.15 (0.86-1.5)         | 30                      | 0.97 (0.65-1.38)        | 1 (ref)             | 1.15 (0.87-1.43)       | 1.31 (0.99-1.63)       | 0.29                            |
| M   | Non-Hodgkin Lymphoma | ANLL                      | 40                      | 1.91 (1.37-2.6)         | 84                      | 3.9 (3.11-4.82)         | 112                     | 4.76 (3.92-5.73)        | 1 (ref)             | 1.57 (1.28-1.85)       | 2.45 (2-2.9)           | 1.6E-06                         |
| T   | Non-Hodgkin Lymphoma | ANLL                      | 69                      | 2.02 (1.57-2.56)        | 136                     | 3.91 (3.28-4.63)        | 161                     | 4.44 (3.78-5.18)        | 1 (ref)             | 1.41 (1.21-1.61)       | 1.99 (1.71-2.27)       | 2.2E-06                         |
| W   | Non-Hodgkin Lymphoma | ANLL                      | 29                      | 2.19 (1.47-3.14)        | 52                      | 3.94 (2.94-5.16)        | 49                      | 3.84 (2.84-5.07)        | 1 (ref)             | 1.18 (0.92-1.45)       | 1.4 (1.08-1.71)        | 0.15                            |
| M   | Non-Hodgkin Lymphoma | Colon and Rectum          | 262                     | 0.98 (0.87-1.11)        | 206                     | 0.95 (0.83-1.09)        | 163                     | 0.92 (0.79-1.08)        | 1 (ref)             | 0.99 (0.89-1.1)        | 0.98 (0.88-1.08)       | 0.84                            |
| T   | Non-Hodgkin Lymphoma | Colon and Rectum          | 537                     | 1.12 (1.03-1.22)        | 399                     | 1.04 (0.94-1.14)        | 303                     | 1 (0.89-1.12)           | 1 (ref)             | 0.95 (0.88-1.02)       | 0.9 (0.83-0.96)        | 0.14                            |
| W   | Non-Hodgkin Lymphoma | Colon and Rectum          | 275                     | 1.29 (1.14-1.45)        | 193                     | 1.14 (0.99-1.32)        | 140                     | 1.11 (0.93-1.31)        | 1 (ref)             | 0.91 (0.81-1)          | 0.82 (0.73-0.9)        | 0.06                            |
| W   | Non-Hodgkin Lymphoma | Corpus and Uterus, NOS    | 91                      | 1.03 (0.83-1.26)        | 72                      | 0.86 (0.68-1.08)        | 85                      | 1.02 (0.82-1.27)        | 1 (ref)             | 1.01 (0.84-1.17)       | 1.01 (0.85-1.17)       | 0.98                            |
| M   | Non-Hodgkin Lymphoma | Lung and Bronchus         | 490                     | 1.32 (1.21-1.44)        | 375                     | 1.14 (1.03-1.27)        | 382                     | 1.29 (1.16-1.42)        | 1 (ref)             | 0.97 (0.9-1.04)        | 0.94 (0.87-1)          | 0.34                            |
| T   | Non-Hodgkin Lymphoma | Lung and Bronchus         | 812                     | 1.39 (1.29-1.49)        | 711                     | 1.29 (1.2-1.39)         | 702                     | 1.4 (1.3-1.51)          | 1 (ref)             | 1 (0.94-1.05)          | 0.99 (0.93-1.04)       | 0.73                            |
| W   | Non-Hodgkin Lymphoma | Lung and Bronchus         | 322                     | 1.5 (1.35-1.68)         | 336                     | 1.5 (1.34-1.67)         | 320                     | 1.57 (1.4-1.75)         | 1 (ref)             | 1.03 (0.95-1.12)       | 1.06 (0.97-1.15)       | 0.53                            |
| M   | Non-Hodgkin Lymphoma | Oral Cavity and Pharynx   | 114                     | 1.86 (1.54-2.24)        | 91                      | 1.53 (1.24-1.88)        | 81                      | 1.26 (1-1.57)           | 1 (ref)             | 0.9 (0.76-1.04)        | 0.8 (0.68-0.93)        | 0.15                            |
| T   | Non-Hodgkin Lymphoma | Oral Cavity and Pharynx   | 154                     | 1.79 (1.52-2.09)        | 135                     | 1.65 (1.38-1.95)        | 115                     | 1.34 (1.11-1.61)        | 1 (ref)             | 0.95 (0.82-1.07)       | 0.89 (0.78-1.01)       | 0.36                            |
| W   | Non-Hodgkin Lymphoma | Oral Cavity and Pharynx   | 40                      | 1.6 (1.15-2.18)         | 44                      | 1.94 (1.41-2.6)         | 34                      | 1.58 (1.1-2.21)         | 1 (ref)             | 1.08 (0.82-1.34)       | 1.16 (0.88-1.44)       | 0.56                            |
| M   | Non-Hodgkin Lymphoma | Urinary Bladder           | 236                     | 1.36 (1.19-1.54)        | 216                     | 1.21 (1.05-1.38)        | 198                     | 1.12 (0.97-1.28)        | 1 (ref)             | 0.99 (0.88-1.09)       | 0.97 (0.87-1.07)       | 0.75                            |
| T   | Non-Hodgkin Lymphoma | Urinary Bladder           | 328                     | 1.5 (1.34-1.67)         | 259                     | 1.17 (1.03-1.32)        | 247                     | 1.14 (1.01-1.29)        | 1 (ref)             | 0.94 (0.85-1.03)       | 0.88 (0.8-0.96)        | 0.15                            |
| W   | Non-Hodgkin Lymphoma | Urinary Bladder           | 92                      | 2.04 (1.65-2.5)         | 43                      | 0.99 (0.72-1.34)        | 49                      | 1.27 (0.94-1.68)        | 1 (ref)             | 0.79 (0.63-0.94)       | 0.62 (0.5-0.74)        | 0.02                            |

| Sex | First primary cancer    | Subsequent primary cancer | 1975-1999, SIR |                  | 1990-1999, SIR |                  | 2000-2011, SIR |                  | 1975-1989, RR (ref) | 1990-1999, RR (95% CI) | 2000-2011, RR (95% CI) | P <sub>trend</sub> <sup>a</sup> |
|-----|-------------------------|---------------------------|----------------|------------------|----------------|------------------|----------------|------------------|---------------------|------------------------|------------------------|---------------------------------|
|     |                         |                           | Obs.           | (95% CI)         | Obs.           | (95% CI)         | Obs.           | (95% CI)         |                     |                        |                        |                                 |
| M   | Oral Cavity and Pharynx | ANLL                      | 18             | 0.85 (0.51-1.35) | 10             | 0.8 (0.39-1.46)  | 11             | 1.13 (0.57-2.02) | 1 (ref)             | 1.06 (0.63-1.48)       | 1.11 (0.67-1.56)       | 0.81                            |
| T   | Oral Cavity and Pharynx | ANLL                      | 24             | 0.86 (0.55-1.27) | 13             | 0.78 (0.42-1.32) | 17             | 1.36 (0.79-2.17) | 1 (ref)             | 1.13 (0.75-1.52)       | 1.28 (0.84-1.71)       | 0.49                            |
| W   | Oral Cavity and Pharynx | ANLL                      | 6              | 0.86 (0.32-1.86) | 3              | 0.71 (0.15-2.07) | 6              | 2.16 (0.79-4.69) | 1 (ref)             | 1.35 (0.49-2.21)       | 1.81 (0.65-2.97)       | 0.37                            |
| M   | Oral Cavity and Pharynx | Colon and Rectum          | 284            | 1.03 (0.92-1.16) | 151            | 1.17 (0.99-1.37) | 79             | 1.01 (0.8-1.25)  | 1 (ref)             | 0.98 (0.86-1.09)       | 0.95 (0.84-1.06)       | 0.64                            |
| T   | Oral Cavity and Pharynx | Colon and Rectum          | 412            | 1.07 (0.97-1.17) | 209            | 1.14 (0.99-1.31) | 108            | 1.02 (0.83-1.23) | 1 (ref)             | 0.97 (0.87-1.07)       | 0.94 (0.84-1.03)       | 0.48                            |
| W   | Oral Cavity and Pharynx | Colon and Rectum          | 128            | 1.15 (0.96-1.36) | 58             | 1.07 (0.81-1.38) | 29             | 1.04 (0.7-1.49)  | 1 (ref)             | 0.95 (0.77-1.14)       | 0.9 (0.73-1.08)        | 0.59                            |
| W   | Oral Cavity and Pharynx | Corpus and Uterus, NOS    | 24             | 0.49 (0.32-0.73) | 28             | 0.97 (0.64-1.39) | 15             | 0.72 (0.41-1.19) | 1 (ref)             | 1.18 (0.82-1.55)       | 1.4 (0.97-1.82)        | 0.29                            |
| M   | Oral Cavity and Pharynx | Lung and Bronchus         | 906            | 2.36 (2.21-2.52) | 448            | 2.28 (2.07-2.5)  | 332            | 2.59 (2.32-2.89) | 1 (ref)             | 0.98 (0.92-1.04)       | 0.95 (0.89-1.01)       | 0.40                            |
| T   | Oral Cavity and Pharynx | Lung and Bronchus         | 1250           | 2.49 (2.36-2.64) | 665            | 2.46 (2.28-2.66) | 463            | 2.68 (2.45-2.94) | 1 (ref)             | 0.96 (0.91-1.01)       | 0.91 (0.86-0.96)       | 0.07                            |
| W   | Oral Cavity and Pharynx | Lung and Bronchus         | 344            | 2.93 (2.63-3.25) | 217            | 2.98 (2.59-3.4)  | 131            | 2.95 (2.46-3.49) | 1 (ref)             | 0.9 (0.81-0.99)        | 0.8 (0.72-0.88)        | 0.03                            |
| M   | Oral Cavity and Pharynx | Urinary Bladder           | 173            | 0.98 (0.84-1.14) | 108            | 1.04 (0.86-1.26) | 86             | 1.19 (0.95-1.47) | 1 (ref)             | 1.06 (0.92-1.2)        | 1.12 (0.97-1.27)       | 0.44                            |
| T   | Oral Cavity and Pharynx | Urinary Bladder           | 194            | 0.97 (0.84-1.12) | 124            | 1.06 (0.88-1.26) | 95             | 1.18 (0.96-1.45) | 1 (ref)             | 1.06 (0.92-1.19)       | 1.11 (0.97-1.25)       | 0.44                            |
| W   | Oral Cavity and Pharynx | Urinary Bladder           | 21             | 0.89 (0.55-1.36) | 16             | 1.18 (0.68-1.92) | 9              | 1.12 (0.51-2.11) | 1 (ref)             | 1.02 (0.63-1.41)       | 1.04 (0.64-1.43)       | 0.94                            |
| W   | Ovary                   | ANLL                      | 43             | 3.51 (2.54-4.73) | 15             | 2.28 (1.28-3.75) | 19             | 4.86 (2.93-7.58) | 1 (ref)             | 0.82 (0.58-1.06)       | 0.67 (0.47-0.87)       | 0.18                            |
| W   | Ovary                   | Colon and Rectum          | 270            | 1.51 (1.34-1.7)  | 104            | 1.3 (1.07-1.58)  | 44             | 1.14 (0.83-1.52) | 1 (ref)             | 0.89 (0.76-1.02)       | 0.79 (0.67-0.91)       | 0.12                            |
| W   | Ovary                   | Lung and Bronchus         | 237            | 1.12 (0.99-1.28) | 111            | 0.98 (0.8-1.18)  | 55             | 0.88 (0.66-1.14) | 1 (ref)             | 0.87 (0.74-1)          | 0.76 (0.65-0.87)       | 0.06                            |
| W   | Ovary                   | Oral Cavity and Pharynx   | 21             | 0.88 (0.54-1.34) | 11             | 0.91 (0.45-1.62) | 12             | 1.64 (0.85-2.85) | 1 (ref)             | 1.15 (0.7-1.6)         | 1.32 (0.81-1.83)       | 0.50                            |
| W   | Ovary                   | Urinary Bladder           | 66             | 1.63 (1.26-2.07) | 26             | 1.26 (0.82-1.84) | 15             | 1.35 (0.76-2.22) | 1 (ref)             | 1.02 (0.71-1.32)       | 1.03 (0.72-1.33)       | 0.94                            |
| M   | Prostate                | ANLL                      | 131            | 0.95 (0.79-1.13) | 361            | 1.04 (0.94-1.15) | 262            | 0.94 (0.83-1.06) | 1 (ref)             | 0.98 (0.88-1.08)       | 0.95 (0.85-1.05)       | 0.59                            |
| M   | Prostate                | Colon and Rectum          | 1640           | 0.89 (0.84-0.93) | 3108           | 0.9 (0.87-0.94)  | 1827           | 0.89 (0.85-0.93) | 1 (ref)             | 1.01 (0.98-1.04)       | 1.02 (0.98-1.05)       | 0.74                            |
| M   | Prostate                | Lung and Bronchus         | 1884           | 0.82 (0.78-0.86) | 4247           | 0.81 (0.79-0.84) | 3198           | 0.87 (0.84-0.9)  | 1 (ref)             | 1.05 (1.02-1.08)       | 1.09 (1.06-1.12)       | 0.01                            |
| M   | Prostate                | Oral Cavity and Pharynx   | 243            | 0.79 (0.69-0.89) | 545            | 0.77 (0.71-0.84) | 518            | 0.8 (0.73-0.87)  | 1 (ref)             | 1.01 (0.93-1.08)       | 1.01 (0.93-1.09)       | 0.96                            |
| M   | Prostate                | Urinary Bladder           | 1144           | 1.01 (0.96-1.07) | 3077           | 1.06 (1.02-1.09) | 2326           | 1.1 (1.06-1.15)  | 1 (ref)             | 1.06 (1.02-1.1)        | 1.12 (1.08-1.16)       | 3.9E-03                         |
| M   | Testis                  | ANLL                      | 24             | 2.42 (1.55-3.59) | 9              | 1.89 (0.87-3.58) | 6              | 2.9 (1.07-6.3)   | 1 (ref)             | 0.85 (0.43-1.26)       | 0.71 (0.36-1.06)       | 0.49                            |
| M   | Testis                  | Colon and Rectum          | 108            | 1.03 (0.84-1.24) | 55             | 1.09 (0.83-1.42) | 35             | 1.66 (1.16-2.31) | 1 (ref)             | 1.4 (1.09-1.71)        | 1.95 (1.52-2.38)       | 3.3E-03                         |
| M   | Testis                  | Lung and Bronchus         | 156            | 1.06 (0.9-1.24)  | 54             | 0.96 (0.72-1.25) | 34             | 1.79 (1.24-2.49) | 1 (ref)             | 1.23 (0.98-1.48)       | 1.51 (1.19-1.82)       | 0.06                            |
| M   | Testis                  | Oral Cavity and Pharynx   | 44             | 0.97 (0.71-1.3)  | 10             | 0.41 (0.2-0.75)  | 8              | 0.76 (0.33-1.5)  | 1 (ref)             | 0.67 (0.39-0.96)       | 0.45 (0.26-0.64)       | 0.07                            |
| M   | Testis                  | Urinary Bladder           | 129            | 1.76 (1.47-2.09) | 40             | 1.32 (0.94-1.79) | 20             | 1.85 (1.13-2.85) | 1 (ref)             | 1 (0.75-1.25)          | 1 (0.75-1.25)          | 0.98                            |
| M   | Thyroid                 | ANLL                      | 5              | 0.67 (0.22-1.55) | 4              | 0.83 (0.23-2.11) | 8              | 1.8 (0.78-3.54)  | 1 (ref)             | 1.47 (0.41-2.52)       | 2.15 (0.6-3.69)        | 0.30                            |
| T   | Thyroid                 | ANLL                      | 11             | 0.49 (0.25-0.88) | 14             | 1 (0.55-1.67)    | 34             | 2.63 (1.82-3.67) | 1 (ref)             | 2.82 (1.56-4.07)       | 7.92 (4.38-11.5)       | 5.6E-06                         |
| W   | Thyroid                 | ANLL                      | 6              | 0.4 (0.15-0.88)  | 10             | 1.09 (0.53-2)    | 26             | 3.06 (2-4.48)    | 1 (ref)             | 3.83 (1.69-5.97)       | 14.6 (6.44-22.8)       | 2.7E-06                         |
| M   | Thyroid                 | Colon and Rectum          | 76             | 0.89 (0.7-1.11)  | 50             | 1.04 (0.77-1.36) | 37             | 1 (0.7-1.37)     | 1 (ref)             | 1.02 (0.8-1.23)        | 1.03 (0.8-1.25)        | 0.93                            |
| T   | Thyroid                 | Colon and Rectum          | 238            | 0.86 (0.75-0.98) | 143            | 0.94 (0.79-1.11) | 109            | 0.9 (0.74-1.09)  | 1 (ref)             | 0.94 (0.83-1.06)       | 0.89 (0.78-1)          | 0.33                            |
| W   | Thyroid                 | Colon and Rectum          | 162            | 0.85 (0.72-0.99) | 93             | 0.9 (0.73-1.1)   | 72             | 0.86 (0.67-1.08) | 1 (ref)             | 0.91 (0.77-1.04)       | 0.82 (0.69-0.94)       | 0.18                            |
| W   | Thyroid                 | Corpus and Uterus, NOS    | 109            | 0.87 (0.71-1.04) | 85             | 1.02 (0.81-1.26) | 78             | 0.97 (0.77-1.21) | 1 (ref)             | 1 (0.83-1.17)          | 0.99 (0.82-1.16)       | 0.94                            |
| M   | Thyroid                 | Lung and Bronchus         | 91             | 0.73 (0.59-0.89) | 68             | 0.95 (0.74-1.21) | 44             | 0.79 (0.58-1.06) | 1 (ref)             | 1.02 (0.82-1.22)       | 1.04 (0.84-1.24)       | 0.86                            |
| T   | Thyroid                 | Lung and Bronchus         | 292            | 0.77 (0.69-0.87) | 200            | 0.92 (0.8-1.06)  | 159            | 0.88 (0.75-1.03) | 1 (ref)             | 1.06 (0.94-1.18)       | 1.12 (0.99-1.25)       | 0.35                            |
| W   | Thyroid                 | Lung and Bronchus         | 201            | 0.8 (0.69-0.91)  | 132            | 0.9 (0.76-1.07)  | 115            | 0.93 (0.76-1.11) | 1 (ref)             | 1.09 (0.94-1.24)       | 1.18 (1.01-1.34)       | 0.27                            |
| M   | Thyroid                 | Oral Cavity and Pharynx   | 24             | 0.94 (0.6-1.4)   | 13             | 0.77 (0.41-1.31) | 9              | 0.57 (0.26-1.07) | 1 (ref)             | 0.81 (0.47-1.16)       | 0.66 (0.38-0.94)       | 0.33                            |
| T   | Thyroid                 | Oral Cavity and Pharynx   | 44             | 0.79 (0.57-1.06) | 33             | 0.93 (0.64-1.31) | 31             | 0.93 (0.64-1.32) | 1 (ref)             | 1.04 (0.76-1.31)       | 1.07 (0.79-1.35)       | 0.81                            |
| W   | Thyroid                 | Oral Cavity and Pharynx   | 20             | 0.66 (0.4-1.02)  | 20             | 1.08 (0.66-1.67) | 22             | 1.27 (0.8-1.93)  | 1 (ref)             | 1.22 (0.8-1.64)        | 1.48 (0.96-1.99)       | 0.28                            |
| M   | Thyroid                 | Urinary Bladder           | 47             | 0.79 (0.58-1.05) | 24             | 0.64 (0.41-0.95) | 44             | 1.4 (1.02-1.88)  | 1 (ref)             | 1.17 (0.86-1.48)       | 1.36 (1-1.72)          | 0.26                            |

| Sex | First primary cancer | Subsequent primary cancer | 1975-1999, Obs. | 1975-1999, SIR (95% CI) | 1990-1999, Obs. | 1990-1999, SIR (95% CI) | 2000-2011, Obs. | 2000-2011, SIR (95% CI) | 1975-1989, RR (ref) | 1990-1999, RR (95% CI) | 2000-2011, RR (95% CI) | $P_{trend}^a$ |
|-----|----------------------|---------------------------|-----------------|-------------------------|-----------------|-------------------------|-----------------|-------------------------|---------------------|------------------------|------------------------|---------------|
|     |                      |                           |                 |                         |                 |                         |                 |                         |                     |                        |                        |               |
| T   | Thyroid              | Urinary Bladder           | 68              | 0.65 (0.51-0.83)        | 46              | 0.73 (0.54-0.98)        | 65              | 1.23 (0.95-1.57)        | 1 (ref)             | 1.25 (0.98-1.52)       | 1.55 (1.22-1.88)       | 0.04          |
| W   | Thyroid              | Urinary Bladder           | 21              | 0.47 (0.29-0.71)        | 22              | 0.87 (0.55-1.31)        | 21              | 0.98 (0.61-1.5)         | 1 (ref)             | 1.42 (0.91-1.94)       | 2.02 (1.29-2.75)       | 0.06          |
| M   | Urinary Bladder      | ANLL                      | 76              | 1.26 (0.99-1.57)        | 52              | 1.15 (0.86-1.51)        | 30              | 0.92 (0.62-1.32)        | 1 (ref)             | 0.83 (0.66-1.01)       | 0.69 (0.55-0.83)       | 0.08          |
| T   | Urinary Bladder      | ANLL                      | 89              | 1.22 (0.98-1.5)         | 60              | 1.12 (0.85-1.44)        | 37              | 0.96 (0.68-1.32)        | 1 (ref)             | 0.84 (0.68-1)          | 0.71 (0.57-0.84)       | 0.07          |
| W   | Urinary Bladder      | ANLL                      | 13              | 1.04 (0.56-1.78)        | 8               | 0.92 (0.4-1.81)         | 7               | 1.16 (0.47-2.38)        | 1 (ref)             | 0.91 (0.47-1.35)       | 0.83 (0.43-1.23)       | 0.69          |
| M   | Urinary Bladder      | Colon and Rectum          | 781             | 1.01 (0.94-1.09)        | 406             | 0.92 (0.83-1.01)        | 217             | 0.94 (0.82-1.07)        | 1 (ref)             | 0.95 (0.88-1.02)       | 0.89 (0.83-0.96)       | 0.11          |
| T   | Urinary Bladder      | Colon and Rectum          | 971             | 1 (0.93-1.06)           | 491             | 0.88 (0.81-0.97)        | 282             | 0.97 (0.86-1.09)        | 1 (ref)             | 0.96 (0.9-1.02)        | 0.92 (0.86-0.98)       | 0.18          |
| W   | Urinary Bladder      | Colon and Rectum          | 190             | 0.93 (0.8-1.07)         | 85              | 0.75 (0.6-0.93)         | 65              | 1.08 (0.84-1.38)        | 1 (ref)             | 1.02 (0.87-1.17)       | 1.04 (0.89-1.19)       | 0.82          |
| W   | Urinary Bladder      | Corpus and Uterus, NOS    | 62              | 0.82 (0.63-1.05)        | 36              | 0.74 (0.52-1.02)        | 29              | 0.84 (0.56-1.2)         | 1 (ref)             | 1.02 (0.78-1.26)       | 1.03 (0.8-1.27)        | 0.90          |
| M   | Urinary Bladder      | Lung and Bronchus         | 1616            | 1.56 (1.49-1.64)        | 1169            | 1.74 (1.65-1.85)        | 738             | 1.83 (1.7-1.97)         | 1 (ref)             | 1.08 (1.03-1.13)       | 1.16 (1.11-1.21)       | 1.3E-03       |
| T   | Urinary Bladder      | Lung and Bronchus         | 2036            | 1.66 (1.59-1.73)        | 1527            | 1.87 (1.78-1.96)        | 945             | 1.89 (1.77-2.01)        | 1 (ref)             | 1.07 (1.02-1.11)       | 1.13 (1.08-1.17)       | 3.7E-03       |
| W   | Urinary Bladder      | Lung and Bronchus         | 420             | 2.17 (1.97-2.39)        | 358             | 2.44 (2.2-2.71)         | 207             | 2.13 (1.85-2.44)        | 1 (ref)             | 1.01 (0.93-1.1)        | 1.02 (0.93-1.11)       | 0.85          |
| M   | Urinary Bladder      | Oral Cavity and Pharynx   | 145             | 0.94 (0.79-1.1)         | 89              | 0.87 (0.7-1.07)         | 76              | 1.01 (0.79-1.26)        | 1 (ref)             | 1.02 (0.87-1.17)       | 1.04 (0.89-1.19)       | 0.83          |
| T   | Urinary Bladder      | Oral Cavity and Pharynx   | 169             | 0.95 (0.82-1.11)        | 103             | 0.88 (0.72-1.07)        | 89              | 1.04 (0.84-1.28)        | 1 (ref)             | 1.03 (0.89-1.17)       | 1.05 (0.91-1.19)       | 0.74          |
| W   | Urinary Bladder      | Oral Cavity and Pharynx   | 24              | 1.07 (0.69-1.59)        | 14              | 0.98 (0.54-1.64)        | 13              | 1.33 (0.71-2.28)        | 1 (ref)             | 1.08 (0.68-1.47)       | 1.15 (0.73-1.57)       | 0.71          |

Abbreviations: ANLL, acute non-lymphocytic leukemia; M, Men; Obs. Observed number of subsequent primary cancers; RR, ratio of SIR, SIR, standardized incidence ratio; Women, W; T, Total

<sup>a</sup> $P_{trend}$  in the SIRs were tested using the likelihood ratio test for the linear diagnosis year term in a multivariate Poisson regression model. The model included the observed number of cases as an outcome, calendar year of (1975-1989 [reference], 1990-1999, 2000-2011), age at (20-39, 40-64, 66-84 years), and time since first cancer diagnosis (60-119, 120-179, 180+ months) and sex as covariables, and the log of the expected number of cases as an offset to indirectly adjust for attained age and attained year of SPCs.



**eTable 11.** Results based on a single outcome analysis for the risk of developing subsequent primary cancer overall among 5-year cancer survivors in 12 SEER registries

|                                  | Survivors           |      | Observed number of SPCs |      | Incidence per 10,000 person-years | Expected number of SPCs | SIR  | (95% CI)       | Mean age at FPCs | Mean age at SPCs | Mean person-years |
|----------------------------------|---------------------|------|-------------------------|------|-----------------------------------|-------------------------|------|----------------|------------------|------------------|-------------------|
|                                  | N                   | %    | N                       | %    |                                   |                         |      |                |                  |                  |                   |
| <b>Men</b>                       | 732888 <sup>a</sup> | 100  | 76880                   | 100  |                                   |                         |      |                |                  |                  |                   |
| Larynx                           | 8194                | 1.1  | 1715                    | 2.2  | 335                               | 2770                    | 1.62 | (1.54 to 1.7)  | 62.2             | 72.2             | 6.2               |
| Hodgkin Lymphoma                 | 7043                | 1.0  | 548                     | 0.7  | 89                                | 817                     | 1.49 | (1.37 to 1.63) | 39.7             | 60.0             | 8.8               |
| Kaposi Sarcoma                   | 3823                | 0.5  | 355                     | 0.5  | 106                               | 509                     | 1.44 | (1.29 to 1.6)  | 43.1             | 57.0             | 8.8               |
| Esophagus                        | 2501                | 0.3  | 332                     | 0.4  | 255                               | 431                     | 1.30 | (1.17 to 1.45) | 62.5             | 71.8             | 5.2               |
| Pancreas                         | 1554                | 0.2  | 148                     | 0.2  | 213                               | 186                     | 1.26 | (1.07 to 1.48) | 59.7             | 70.9             | 4.5               |
| Oral Cavity and Pharynx          | 20841               | 2.8  | 2566                    | 3.3  | 192                               | 3184                    | 1.24 | (1.2 to 1.29)  | 57.0             | 69.6             | 6.4               |
| Gallbladder and Other Biliary    | 934                 | 0.1  | 113                     | 0.1  | 223                               | 133                     | 1.18 | (0.98 to 1.42) | 62.3             | 71.6             | 5.4               |
| Lung and Bronchus                | 18189               | 2.5  | 1839                    | 2.4  | 206                               | 2093                    | 1.14 | (1.09 to 1.2)  | 63.9             | 73.2             | 4.9               |
| Breast                           | 1704                | 0.2  | 239                     | 0.3  | 233                               | 272                     | 1.14 | (1 to 1.3)     | 62.8             | 74.1             | 6.0               |
| Penis and Other Genital Organs   | 1453                | 0.2  | 199                     | 0.3  | 212                               | 225                     | 1.13 | (0.99 to 1.31) | 60.9             | 72.7             | 6.5               |
| Non Hodgkin-Lymphoma             | 41119               | 5.6  | 4488                    | 5.8  | 173                               | 4977                    | 1.11 | (1.08 to 1.15) | 58.6             | 71.3             | 6.3               |
| Thyroid                          | 11790               | 1.6  | 1049                    | 1.4  | 117                               | 1151                    | 1.10 | (1.04 to 1.17) | 49.2             | 66.4             | 7.6               |
| Acute Non-Lymphocytic Leukemia   | 1838                | 0.3  | 134                     | 0.2  | 101                               | 146                     | 1.09 | (0.92 to 1.3)  | 47.1             | 65.4             | 7.2               |
| Stomach                          | 5650                | 0.8  | 632                     | 0.8  | 193                               | 660                     | 1.04 | (0.97 to 1.13) | 62.8             | 73.4             | 5.8               |
| Eye and Orbit                    | 1538                | 0.2  | 182                     | 0.2  | 169                               | 189                     | 1.04 | (0.9 to 1.21)  | 57.5             | 73.2             | 7.0               |
| Soft Tissue including Heart      | 4815                | 0.7  | 468                     | 0.6  | 131                               | 483                     | 1.03 | (0.95 to 1.14) | 52.2             | 69.8             | 7.4               |
| Urinary Bladder                  | 44604               | 6.1  | 5992                    | 7.8  | 208                               | 6190                    | 1.03 | (1.01 to 1.06) | 65.2             | 75.3             | 6.5               |
| Kidney and Renal Pelvis          | 22881               | 3.1  | 2427                    | 3.2  | 173                               | 2490                    | 1.03 | (0.99 to 1.07) | 58.9             | 71.4             | 6.1               |
| Bones and Joints                 | 1338                | 0.2  | 96                      | 0.1  | 87                                | 97                      | 1.02 | (0.83 to 1.24) | 43.9             | 63.6             | 8.3               |
| Small Intestine                  | 2522                | 0.3  | 250                     | 0.3  | 169                               | 251                     | 1.00 | (0.89 to 1.14) | 58.5             | 70.5             | 5.9               |
| Testis                           | 17490               | 2.4  | 726                     | 0.9  | 42                                | 721                     | 0.99 | (0.93 to 1.07) | 35.7             | 56.8             | 9.8               |
| Anus, Anal Canal and Anorectum   | 1818                | 0.2  | 185                     | 0.2  | 153                               | 184                     | 0.99 | (0.86 to 1.15) | 55.4             | 67.9             | 6.7               |
| Brain and Other Nervous System   | 4690                | 0.6  | 210                     | 0.3  | 64                                | 204                     | 0.97 | (0.85 to 1.12) | 41.8             | 60.2             | 7.0               |
| Myeloma                          | 6293                | 0.9  | 461                     | 0.6  | 171                               | 438                     | 0.95 | (0.87 to 1.05) | 60.9             | 70.0             | 4.3               |
| Colon and Rectum                 | 67061               | 9.2  | 7619                    | 9.9  | 175                               | 7109                    | 0.93 | (0.92 to 0.96) | 62.9             | 74.5             | 6.5               |
| Liver and Intrahepatic Bile Duct | 3394                | 0.5  | 186                     | 0.2  | 125                               | 167                     | 0.90 | (0.78 to 1.04) | 58.7             | 67.8             | 4.4               |
| Melanoma of the Skin             | 41813               | 5.7  | 3959                    | 5.1  | 125                               | 3468                    | 0.88 | (0.85 to 0.91) | 55.6             | 70.7             | 7.6               |
| Prostate                         | 373395              | 50.9 | 38403                   | 50.0 | 151                               | 32527                   | 0.85 | (0.84 to 0.86) | 66.3             | 77.2             | 6.8               |

|                                  | Survivors           |      | Observed number of SPCs |      | Incidence per 10,000 person-years | Expected number of SPCs | SIR  | (95% CI)       | Mean age at FPCs | Mean age at SPCs | Mean person-years |
|----------------------------------|---------------------|------|-------------------------|------|-----------------------------------|-------------------------|------|----------------|------------------|------------------|-------------------|
|                                  | N                   | %    | N                       | %    |                                   |                         |      |                |                  |                  |                   |
| <b>Women</b>                     | 704809 <sup>a</sup> | 100  | 51325                   | 100  |                                   |                         |      |                |                  |                  |                   |
| Larynx                           | 1896                | 0.3  | 376                     | 0.7  | 316                               | 888                     | 2.36 | (2.13 to 2.62) | 60.8             | 70.8             | 6.3               |
| Esophagus                        | 783                 | 0.1  | 105                     | 0.2  | 256                               | 186                     | 1.77 | (1.45 to 2.15) | 65.0             | 72.7             | 5.2               |
| Hodgkin Lymphoma                 | 6113                | 0.9  | 499                     | 1.0  | 89                                | 860                     | 1.72 | (1.58 to 1.89) | 38.2             | 56.7             | 9.1               |
| Anus, Anal Canal and Anorectum   | 2879                | 0.4  | 323                     | 0.6  | 172                               | 438                     | 1.36 | (1.22 to 1.52) | 59.6             | 69.7             | 6.5               |
| Pancreas                         | 1593                | 0.2  | 124                     | 0.2  | 153                               | 167                     | 1.35 | (1.13 to 1.61) | 59.5             | 69.7             | 5.1               |
| Oral Cavity and Pharynx          | 9959                | 1.4  | 954                     | 1.9  | 140                               | 1198                    | 1.26 | (1.18 to 1.34) | 57.5             | 70.4             | 6.8               |
| Gallbladder and Other Biliary    | 1248                | 0.2  | 122                     | 0.2  | 163                               | 143                     | 1.17 | (0.98 to 1.41) | 64.4             | 74.2             | 6.0               |
| Small Intestine                  | 2354                | 0.3  | 200                     | 0.4  | 145                               | 229                     | 1.15 | (1 to 1.32)    | 60.2             | 72.1             | 5.9               |
| Urinary Bladder                  | 14505               | 2.1  | 1626                    | 3.2  | 167                               | 1863                    | 1.15 | (1.1 to 1.21)  | 66.1             | 75.1             | 6.7               |
| Liver and Intrahepatic Bile Duct | 1387                | 0.2  | 79                      | 0.2  | 124                               | 90                      | 1.14 | (0.9 to 1.42)  | 60.1             | 68.8             | 4.6               |
| Vagina and Other Genital Organs  | 5616                | 0.8  | 512                     | 1.0  | 131                               | 577                     | 1.13 | (1.04 to 1.23) | 58.5             | 70.7             | 7.0               |
| Acute Non-Lymphocytic Leukemia   | 1813                | 0.3  | 121                     | 0.2  | 87                                | 136                     | 1.13 | (0.94 to 1.35) | 46.7             | 64.6             | 7.7               |
| Non Hodgkin-Lymphoma             | 35268               | 5.0  | 3102                    | 6.0  | 136                               | 3484                    | 1.12 | (1.09 to 1.17) | 61.2             | 72.4             | 6.5               |
| Eye and Orbit                    | 1305                | 0.2  | 119                     | 0.2  | 129                               | 130                     | 1.09 | (0.91 to 1.31) | 57.6             | 69.9             | 7.1               |
| Lung and Bronchus                | 21591               | 3.1  | 1478                    | 2.9  | 132                               | 1596                    | 1.08 | (1.03 to 1.14) | 64.6             | 73.6             | 5.2               |
| Ovary                            | 16851               | 2.4  | 1169                    | 2.3  | 100                               | 1240                    | 1.06 | (1.01 to 1.13) | 55.0             | 68.4             | 7.0               |
| Kidney and Renal Pelvis          | 14692               | 2.1  | 1236                    | 2.4  | 132                               | 1310                    | 1.06 | (1.01 to 1.13) | 60.2             | 71.7             | 6.4               |
| Cervix Uteri                     | 19486               | 2.8  | 1420                    | 2.8  | 79                                | 1487                    | 1.05 | (1 to 1.11)    | 46.1             | 63.3             | 9.2               |
| Thyroid                          | 42107               | 6.0  | 2483                    | 4.8  | 75                                | 2580                    | 1.04 | (1 to 1.08)    | 46.1             | 62.9             | 7.9               |
| Soft Tissue including Heart      | 4036                | 0.6  | 313                     | 0.6  | 100                               | 325                     | 1.04 | (0.93 to 1.16) | 52.4             | 67.9             | 7.8               |
| Kaposi Sarcoma                   | 162                 | 0.0  | 12                      | 0.0  | 124                               | 12                      | 1.00 | (0.52 to 1.76) | 63.6             | 71.1             | 6.0               |
| Breast                           | 314057              | 44.6 | 20506                   | 40.0 | 87                                | 20178                   | 0.98 | (0.98 to 1)    | 58.6             | 71.9             | 7.5               |
| Colon and Rectum                 | 63393               | 9.0  | 5144                    | 10.0 | 123                               | 4979                    | 0.97 | (0.95 to 1)    | 64.8             | 74.8             | 6.6               |
| Corpus and Uterus, NOS           | 59246               | 8.4  | 5152                    | 10.0 | 115                               | 4936                    | 0.96 | (0.94 to 0.99) | 60.2             | 72.3             | 7.6               |
| Myeloma                          | 5311                | 0.8  | 276                     | 0.5  | 123                               | 264                     | 0.96 | (0.85 to 1.08) | 62.9             | 71.1             | 4.2               |
| Brain and Other Nervous System   | 4023                | 0.6  | 178                     | 0.3  | 60                                | 169                     | 0.95 | (0.82 to 1.1)  | 42.6             | 59.3             | 7.3               |
| Stomach                          | 4227                | 0.6  | 287                     | 0.6  | 114                               | 259                     | 0.90 | (0.81 to 1.02) | 63.7             | 75.1             | 6.0               |
| Melanoma of the Skin             | 38110               | 5.4  | 2559                    | 5.0  | 82                                | 2298                    | 0.90 | (0.87 to 0.94) | 50.8             | 67.1             | 8.2               |
| Bones and Joints                 | 1207                | 0.2  | 66                      | 0.1  | 63                                | 54                      | 0.82 | (0.64 to 1.05) | 45.4             | 66.4             | 8.6               |

**eTable 12.** Results based on the earlier start of follow-up (since 1 year from first primary cancer diagnosis) for the risk of developing subsequent primary cancer overall among 1-year cancer survivors in 12 SEER registries

|                                  | Survivors |       | Observed number of SPCs |       | Incidence per 10,000 person-years | Expected number of SPCs | SIR  | (95% CI)       | Mean age at FPCs | Mean age at SPCs | Follow-up years since 1 year from first primary cancer |      |
|----------------------------------|-----------|-------|-------------------------|-------|-----------------------------------|-------------------------|------|----------------|------------------|------------------|--------------------------------------------------------|------|
|                                  | N         | %     | N                       | %     |                                   |                         |      |                |                  |                  | Total                                                  | Mean |
| <b>Men</b>                       | 1066026   | 100.0 | 153260                  | 100.0 |                                   |                         |      |                |                  |                  |                                                        |      |
| Kaposi Sarcoma                   | 7348      | 0.7   | 785                     | 0.5   | 142                               | 375                     | 2.10 | (1.96 to 2.25) | 41.8             | 53.0             | 55183                                                  | 7.5  |
| Larynx                           | 14000     | 1.3   | 3884                    | 2.5   | 371                               | 2139                    | 1.82 | (1.76 to 1.88) | 63.3             | 71.1             | 104747                                                 | 7.5  |
| Hodgkin Lymphoma                 | 8398      | 0.8   | 931                     | 0.6   | 97                                | 580                     | 1.61 | (1.51 to 1.72) | 41.2             | 60.7             | 96134                                                  | 11.4 |
| Oral Cavity and Pharynx          | 34788     | 3.3   | 5989                    | 3.9   | 227                               | 4047                    | 1.48 | (1.45 to 1.52) | 58.9             | 68.6             | 263573                                                 | 7.6  |
| Miscellaneous                    | 7654      | 0.7   | 1106                    | 0.7   | 234                               | 830                     | 1.33 | (1.26 to 1.42) | 62.2             | 70.5             | 47351                                                  | 6.2  |
| Gallbladder and Other Biliary    | 3034      | 0.3   | 306                     | 0.2   | 252                               | 230                     | 1.33 | (1.19 to 1.49) | 64.8             | 71.5             | 12143                                                  | 4.0  |
| Esophagus                        | 8335      | 0.8   | 792                     | 0.5   | 247                               | 622                     | 1.27 | (1.19 to 1.37) | 63.8             | 70.9             | 32021                                                  | 3.8  |
| Other Leukemia                   | 8327      | 0.8   | 943                     | 0.6   | 149                               | 775                     | 1.22 | (1.14 to 1.3)  | 54.2             | 68.3             | 63436                                                  | 7.6  |
| Anus, Anal Canal and Anorectum   | 2990      | 0.3   | 402                     | 0.3   | 177                               | 335                     | 1.20 | (1.09 to 1.33) | 56.6             | 67.3             | 22667                                                  | 7.6  |
| Other Male Genital Organs        | 2175      | 0.2   | 414                     | 0.3   | 227                               | 347                     | 1.19 | (1.09 to 1.32) | 62.8             | 72.4             | 18251                                                  | 8.4  |
| Non-Hodgkin Lymphoma             | 60281     | 5.7   | 9448                    | 6.2   | 190                               | 7980                    | 1.18 | (1.16 to 1.21) | 60.7             | 71.2             | 497059                                                 | 8.2  |
| Thyroid                          | 13494     | 1.3   | 1886                    | 1.2   | 125                               | 1593                    | 1.18 | (1.14 to 1.24) | 50.7             | 66.6             | 150447                                                 | 11.1 |
| Eye and Orbit                    | 2209      | 0.2   | 383                     | 0.2   | 195                               | 323                     | 1.18 | (1.07 to 1.31) | 59.6             | 71.6             | 19603                                                  | 8.9  |
| Other Digestive Organs           | 1243      | 0.1   | 127                     | 0.1   | 165                               | 107                     | 1.18 | (0.99 to 1.41) | 58.0             | 66.9             | 7678                                                   | 6.2  |
| Kidney and Renal Pelvis          | 34479     | 3.2   | 5679                    | 3.7   | 199                               | 4809                    | 1.18 | (1.15 to 1.22) | 60.7             | 70.7             | 285978                                                 | 8.3  |
| Lung and Bronchus                | 67627     | 6.3   | 5170                    | 3.4   | 213                               | 4411                    | 1.17 | (1.14 to 1.21) | 65.9             | 72.3             | 242626                                                 | 3.6  |
| Urinary Bladder                  | 67822     | 6.4   | 13907                   | 9.1   | 238                               | 11907                   | 1.17 | (1.15 to 1.19) | 67.1             | 74.5             | 583599                                                 | 8.6  |
| Acute Non-Lymphocytic Leukemia   | 4294      | 0.4   | 274                     | 0.2   | 114                               | 236                     | 1.16 | (1.03 to 1.31) | 53.7             | 65.9             | 24140                                                  | 5.6  |
| Small Intestine                  | 3938      | 0.4   | 582                     | 0.4   | 195                               | 503                     | 1.16 | (1.07 to 1.26) | 60.3             | 70.1             | 29869                                                  | 7.6  |
| Breast                           | 2463      | 0.2   | 488                     | 0.3   | 234                               | 428                     | 1.14 | (1.05 to 1.25) | 64.1             | 73.1             | 20821                                                  | 8.5  |
| Pancreas                         | 7827      | 0.7   | 379                     | 0.2   | 190                               | 337                     | 1.12 | (1.02 to 1.25) | 63.0             | 70.6             | 19941                                                  | 2.5  |
| Soft Tissue including Heart      | 7272      | 0.7   | 929                     | 0.6   | 146                               | 832                     | 1.12 | (1.05 to 1.2)  | 53.7             | 69.6             | 63468                                                  | 8.7  |
| Stomach                          | 14193     | 1.3   | 1425                    | 0.9   | 200                               | 1319                    | 1.08 | (1.03 to 1.14) | 64.1             | 72.4             | 71076                                                  | 5.0  |
| Testis                           | 18904     | 1.8   | 1019                    | 0.7   | 40                                | 951                     | 1.07 | (1.01 to 1.14) | 35.8             | 56.3             | 252557                                                 | 13.4 |
| Brain and Other Nervous System   | 10697     | 1.0   | 412                     | 0.3   | 69                                | 389                     | 1.06 | (0.96 to 1.17) | 48.0             | 60.6             | 59739                                                  | 5.6  |
| Bones and Joints                 | 1965      | 0.2   | 166                     | 0.1   | 91                                | 158                     | 1.05 | (0.9 to 1.23)  | 45.5             | 63.3             | 18263                                                  | 9.3  |
| Liver and Intrahepatic Bile Duct | 10566     | 1.0   | 546                     | 0.4   | 139                               | 545                     | 1.00 | (0.92 to 1.09) | 60.9             | 66.6             | 39365                                                  | 3.7  |
| Colon and Rectum                 | 111330    | 10.4  | 15937                   | 10.4  | 183                               | 16098                   | 0.99 | (0.98 to 1.01) | 64.3             | 73.7             | 868841                                                 | 7.8  |
| Melanoma of the Skin             | 54264     | 5.1   | 7959                    | 5.2   | 140                               | 8265                    | 0.96 | (0.95 to 0.99) | 57.5             | 71.0             | 567561                                                 | 10.5 |
| Myeloma                          | 13653     | 1.3   | 1195                    | 0.8   | 174                               | 1262                    | 0.95 | (0.9 to 1.01)  | 64.0             | 70.7             | 68525                                                  | 5.0  |
| Prostate                         | 453527    | 42.5  | 68935                   | 45.0  | 156                               | 74929                   | 0.92 | (0.92 to 0.93) | 67.2             | 76.0             | 4416994                                                | 9.7  |

|                                  | Survivors |       | Observed number of SPCs |       | Incidence per 10,000 person-years | Expected number of SPCs | SIR  | (95% CI)       | Mean age at FPCs | Mean age at SPCs | Follow-up years since 1 year from first primary cancer |      |
|----------------------------------|-----------|-------|-------------------------|-------|-----------------------------------|-------------------------|------|----------------|------------------|------------------|--------------------------------------------------------|------|
|                                  | N         | %     | N                       | %     |                                   |                         |      |                |                  |                  | Total                                                  | Mean |
| <b>Women</b>                     | 990909    | 100.0 | 96125                   | 100.0 |                                   |                         |      |                |                  |                  |                                                        |      |
| Larynx                           | 3220      | 0.3   | 796                     | 0.8   | 334                               | 309                     | 2.58 | (2.41 to 2.77) | 62.3             | 69.5             | 23846                                                  | 7.4  |
| Esophagus                        | 2388      | 0.2   | 241                     | 0.3   | 250                               | 136                     | 1.77 | (1.56 to 2.01) | 66.8             | 70.8             | 9627                                                   | 4.0  |
| Hodgkin Lymphoma                 | 7008      | 0.7   | 748                     | 0.8   | 88                                | 427                     | 1.75 | (1.63 to 1.89) | 39.9             | 57.4             | 85213                                                  | 12.2 |
| Oral Cavity and Pharynx          | 15186     | 1.5   | 2095                    | 2.2   | 166                               | 1409                    | 1.49 | (1.43 to 1.56) | 60.0             | 69.5             | 126304                                                 | 8.3  |
| Anus, Anal Canal and Anorectum   | 4127      | 0.4   | 578                     | 0.6   | 167                               | 421                     | 1.37 | (1.27 to 1.49) | 60.8             | 68.9             | 34602                                                  | 8.4  |
| Urinary Bladder                  | 20211     | 2.0   | 3277                    | 3.4   | 182                               | 2605                    | 1.26 | (1.22 to 1.31) | 67.6             | 74.5             | 180130                                                 | 8.9  |
| Gallbladder and Other Biliary    | 3702      | 0.4   | 268                     | 0.3   | 167                               | 217                     | 1.24 | (1.1 to 1.4)   | 66.2             | 72.7             | 16075                                                  | 4.3  |
| Kaposi Sarcoma                   | 260       | 0.0   | 29                      | 0.0   | 158                               | 24                      | 1.23 | (0.83 to 1.77) | 62.9             | 71.5             | 1837                                                   | 7.1  |
| Kidney and Renal Pelvis          | 20355     | 2.1   | 2626                    | 2.7   | 149                               | 2152                    | 1.22 | (1.18 to 1.27) | 61.9             | 71.1             | 176810                                                 | 8.7  |
| Vagina and Other Genital Organs  | 8419      | 0.8   | 1017                    | 1.1   | 141                               | 835                     | 1.22 | (1.15 to 1.3)  | 60.9             | 69.8             | 71887                                                  | 8.5  |
| Non-Hodgkin Lymphoma             | 48121     | 4.9   | 6019                    | 6.3   | 144                               | 5049                    | 1.19 | (1.17 to 1.23) | 63.0             | 72.0             | 418358                                                 | 8.7  |
| Cervix Uteri                     | 26962     | 2.7   | 2374                    | 2.5   | 85                                | 1993                    | 1.19 | (1.15 to 1.24) | 48.1             | 62.5             | 280045                                                 | 10.4 |
| Other Leukemia                   | 5150      | 0.5   | 417                     | 0.4   | 110                               | 354                     | 1.18 | (1.07 to 1.3)  | 55.4             | 66.3             | 37959                                                  | 7.4  |
| Liver and Intrahepatic Bile Duct | 4280      | 0.4   | 203                     | 0.2   | 126                               | 175                     | 1.16 | (1.01 to 1.34) | 63.7             | 68.5             | 16095                                                  | 3.8  |
| Pancreas                         | 7682      | 0.8   | 279                     | 0.3   | 135                               | 241                     | 1.16 | (1.03 to 1.31) | 64.9             | 70.1             | 20727                                                  | 2.7  |
| Acute Non-Lymphocytic Leukemia   | 3669      | 0.4   | 209                     | 0.2   | 87                                | 181                     | 1.16 | (1.01 to 1.33) | 52.4             | 64.4             | 23927                                                  | 6.5  |
| Eye and Orbit                    | 1772      | 0.2   | 222                     | 0.2   | 135                               | 193                     | 1.15 | (1.01 to 1.32) | 59.7             | 69.7             | 16500                                                  | 9.3  |
| Lung and Bronchus                | 64543     | 6.5   | 3746                    | 3.9   | 136                               | 3280                    | 1.14 | (1.11 to 1.18) | 66.3             | 72.5             | 274482                                                 | 4.3  |
| Small Intestine                  | 3470      | 0.4   | 377                     | 0.4   | 141                               | 330                     | 1.14 | (1.03 to 1.27) | 61.8             | 70.5             | 26766                                                  | 7.7  |
| Soft Tissue including Heart      | 5762      | 0.6   | 565                     | 0.6   | 106                               | 505                     | 1.12 | (1.03 to 1.22) | 54.3             | 67.1             | 53287                                                  | 9.2  |
| Thyroid                          | 45600     | 4.6   | 4037                    | 4.2   | 76                                | 3621                    | 1.12 | (1.09 to 1.15) | 46.8             | 62.8             | 529731                                                 | 11.6 |
| Ovary                            | 32863     | 3.3   | 2218                    | 2.3   | 98                                | 2075                    | 1.07 | (1.03 to 1.12) | 58.4             | 66.7             | 227119                                                 | 6.9  |
| Breast                           | 392959    | 39.7  | 36668                   | 38.1  | 90                                | 34495                   | 1.06 | (1.06 to 1.08) | 59.3             | 70.9             | 4085949                                                | 10.4 |
| Corpus and Uterus, NOS           | 75508     | 7.6   | 9191                    | 9.6   | 120                               | 8728                    | 1.05 | (1.04 to 1.08) | 61.3             | 71.1             | 767038                                                 | 10.2 |
| Colon and Rectum                 | 98690     | 10.0  | 10292                   | 10.7  | 130                               | 9821                    | 1.05 | (1.03 to 1.07) | 65.9             | 73.8             | 792524                                                 | 8.0  |
| Stomach                          | 8992      | 0.9   | 661                     | 0.7   | 130                               | 634                     | 1.04 | (0.97 to 1.13) | 64.6             | 73.3             | 51021                                                  | 5.7  |
| Myeloma                          | 11404     | 1.2   | 726                     | 0.8   | 129                               | 727                     | 1.00 | (0.93 to 1.08) | 65.9             | 71.0             | 56264                                                  | 4.9  |
| Melanoma of the Skin             | 44660     | 4.5   | 4565                    | 4.7   | 89                                | 4574                    | 1.00 | (0.97 to 1.03) | 52.3             | 67.5             | 515156                                                 | 11.5 |
| Bones and Joints                 | 1605      | 0.2   | 116                     | 0.1   | 71                                | 121                     | 0.96 | (0.8 to 1.15)  | 46.8             | 62.9             | 16450                                                  | 10.2 |
| Brain and Other Nervous System   | 8102      | 0.8   | 287                     | 0.3   | 55                                | 316                     | 0.91 | (0.81 to 1.02) | 48.6             | 59.1             | 51860                                                  | 6.4  |

## References

1. Overview of the SEER Program <https://seer.cancer.gov/about/>.
2. Appendix D, Race And Nationality Descriptions From the 2000 U.S. Census Bureau and National Center for Health Statistics ([https://seer.cancer.gov/...als/2018/SPCSM\\_2018\\_AppendixD.pdf-129K](https://seer.cancer.gov/...als/2018/SPCSM_2018_AppendixD.pdf-129K)). .
3. SEER Program Coding and Staging Manual 2018 ([https://seer.cancer.gov/manuals/2018/SPCSM\\_2018\\_maindoc.pdf](https://seer.cancer.gov/manuals/2018/SPCSM_2018_maindoc.pdf) - 1.4M).
4. Surveillance, Epidemiology, and End Results (SEER) Program ([www.seer.cancer.gov](http://www.seer.cancer.gov)) SEER\*Stat Database: Incidence - SEER Research Plus Data, 13 Registries (excl AK), Nov 2019 Sub (1992-2017) - Linked To County Attributes - Total U.S., 1969-2018 Counties, National Cancer Institute, DCCPS, Surveillance Research Program, released April 2020, based on the November 2019 submission. Accessed June 1, 2020-Oct 16, 2020.
5. Surveillance, Epidemiology, and End Results (SEER) Program ([www.seer.cancer.gov](http://www.seer.cancer.gov)) SEER\*Stat Database: Incidence - SEER Research Plus Data, 13 Registries (excl AK), Nov 2019 Sub (1992-2017) for SMRs - Linked To County Attributes - Total U.S., 1969-2018 Counties, National Cancer Institute, DCCPS, Surveillance Research Program, released April 2020, based on the November 2019 submission. Accessed June 1, 2020-Aug 25, 2020.
6. Howlader N, Noone AM, Krapcho M, Miller D, Brest A, Yu M, Ruhl J, Tatalovich Z, Mariotto A, Lewis DR, Chen HS, Feuer EJ, Cronin KA. eds. SEER Cancer Statistics Review, 1975-2017. [https://seer.cancer.gov/csr/1975\\_2017/](https://seer.cancer.gov/csr/1975_2017/), based on November 2019 SEER data submission, posted to the SEER web site, April 2020. Bethesda, MD: National Cancer Institute; 2020.
7. Turner JJ, Morton LM, Linet MS, et al. InterLymph hierarchical classification of lymphoid neoplasms for epidemiologic research based on the WHO classification (2008): update and future directions. *Blood*. 2010;116(20):e90-98.
8. Surveillance, Epidemiology, and End Results (SEER) Program ([www.seer.cancer.gov](http://www.seer.cancer.gov)) SEER\*Stat Database: Incidence - SEER Research Plus Data, 9 Registries, Nov 2019 Sub (1975-2017) - Linked To County Attributes - Total U.S., 1969-2018 Counties, National Cancer Institute, DCCPS, Surveillance Research Program, released April 2020, based on the November 2019 submission. Accessed June 1, 2020-Aug 25, 2020.
9. Curtis RE, Freedman DM, Ron E, Ries LAG, Hacker DG, Edwards BK, Tucker MA, Fraumeni JF Jr. (eds). *New Malignancies Among Cancer Survivors: SEER Cancer Registries, 1973-2000*. National Cancer Institute, NIH Publ. No. 05-5302. Bethesda, MD, 2006.
10. Johnson CH, Peace S, Adamo P, Fritz A, Percy-Laurry A, Edwards BK. *The 2007 Multiple Primary and Histology Coding Rules*. National Cancer Institute, Surveillance, Epidemiology and End Results Program. Bethesda, MD, 2007.
11. UNSCEAR. AnnexA: Epidemiological Studies of Radiation and Cancer. Vol I. New York, NY: United Nations; 2006. Report of the United Nations Scientific Committee on the Effects of Atomic Radiation. UNSCEAR 2006 report.
12. National Center for Health Statistics. National Vital Statistics System. 2020, <https://www.cdc.gov/nchs/nvss/deaths.htm>.
13. U.S. Department of Health and Human Services. *Smoking Cessation. A Report of the Surgeon General*. Atlanta, GA: U.S. Department of Health and Human Services, Centers for Disease Control and Prevention, National Center for Chronic Disease Prevention and Health Promotion, Office on Smoking and Health, 2020.
14. Lauby-Secretan B, Scoccianti C, Loomis D, et al. Body Fatness and Cancer--Viewpoint of the IARC Working Group. *The New England journal of medicine*. 2016;375(8):794-798.

15. World Cancer Research Fund/American Institute for Cancer Research. Continuous Update Project Expert Report 2018. Alcoholic drinks and the risk of cancer. Available at [dietandcancerreport.org](http://dietandcancerreport.org). Accessed on Oct 10, 2020.
16. Bouvard V, Baan R, Straif K, et al. A review of human carcinogens--Part B: biological agents. *Lancet Oncol*. 2009;10(4):321-322.
17. Yasui Y, Liu Y, Neglia JP, et al. A methodological issue in the analysis of second-primary cancer incidence in long-term survivors of childhood cancers. *Am J Epidemiol*. 2003;158(11):1108-1113.
18. Rostgaard K. Methods for stratification of person-time and events - a prerequisite for Poisson regression and SIR estimation. *Epidemiol Perspect Innov*. 2008;5:7.
19. Surveillance Research Program, National Cancer Institute SEER\*Stat software ([www.seer.cancer.gov/seerstat](http://www.seer.cancer.gov/seerstat)) version 8.3.6.
